# Supplementary material for: Global, Regional, and National Cancer Incidence, Mortality, Years of Life Lost, Years Lived With Disability, and Disability-Adjusted Life-Years for 29 Cancer Groups, 1990 to 2016: A Systematic Analysis for the Global Burden of Disease Study
Source: PubMed Central journal article supplement (PMC6248091; doi:10.1001/jamaoncol.2018.2706), 2018-06-02
Supplement: jamaoncol-4-1553-s001.pdf [file jamaoncol-4-1553-s001.pdf]

## Supplementary Online Content

Global Burden of Disease Cancer Collaboration. Global, Regional, and National Cancer Incidence, Mortality, Years of Life Lost, Years Lived With Disability, and Disability-Adjusted Life-Years for 29 Cancer Groups, 1990 to 2016  
A Systematic Analysis for the Global Burden of Disease Study. *JAMA Oncology*.  
Published online June 2, 2018. doi:10.1001/jamaoncol.2018.2706

**eAppendix.**

**eTables 1 through 16.**

**eFigures 1 through 72.**

This supplementary material has been provided by the authors to give readers additional information about their work.

## Supplementary Online Content

Global Burden of Disease Cancer Collaboration. Global, regional, and national cancer incidence, mortality, years of life lost, years lived with disability, and disability-adjusted life years for 29 cancer groups, 1990 to 2016: a systematic analysis for the Global Burden of Disease Study 2016.

## eAppendix

|                                              |    |
|----------------------------------------------|----|
| Definition of indicator .....                | 5  |
| Data sources.....                            | 5  |
| Cancer incidence data sources.....           | 5  |
| Mortality/incidence ratio data sources ..... | 5  |
| Cancer mortality data sources .....          | 5  |
| Bias of categories of input data .....       | 5  |
| Data analysis .....                          | 6  |
| Cancer registry data formatting.....         | 6  |
| Cause of death database formatting .....     | 9  |
| CODEm models .....                           | 9  |
| Liver cancer etiology split models.....      | 9  |
| CodCorrect .....                             | 10 |
| Incidence estimation.....                    | 10 |
| Prevalence and YLD estimation .....          | 10 |
| Probability of cancer .....                  | 13 |
| References .....                             | 14 |

|                                                                                                                                                                                        |     |
|----------------------------------------------------------------------------------------------------------------------------------------------------------------------------------------|-----|
| eTable 1: GATHER Guidelines checklist .....                                                                                                                                            | 17  |
| eTable 2: Sources for cancer incidence and mortality-to-incidence ratio data by country, year, and registry .....                                                                      | 19  |
| eTable 3: Number of site-years for cancer mortality data by type.....                                                                                                                  | 46  |
| eTable 4: List of International Classification of Diseases (ICD) codes mapped to the Global Burden of Disease cause list for cancer incidence data.....                                | 48  |
| eTable 5: List of International Classification of Diseases (ICD) codes mapped to the Global Burden of Disease cause list for cancer mortality data .....                               | 50  |
| eTable 6: Undefined cancer code categories (ICD-10) and respective target codes for cancer registry incidence data.....                                                                | 53  |
| eTable 7: Sociodemographic Index groupings by geography, based on 2016 values .....                                                                                                    | 53  |
| eTable 8: Covariates selected for CODEm for each GBD cancer group and expected direction of covariate .....                                                                            | 59  |
| eTable 9: Comparison of GBD 2015 and GBD 2016 covariates used and level of covariates.....                                                                                             | 83  |
| eTable 10: Results for CODEm model testing.....                                                                                                                                        | 108 |
| eTable 11: Percent change before and after CodCorrect by cancer for all ages, both sexes combined, 2016 .....                                                                          | 118 |
| eTable 12: Duration of four prevalence phases by cancer .....                                                                                                                          | 120 |
| eTable 13: Disability weights .....                                                                                                                                                    | 123 |
| eTable 14: Decomposition of trends in incidence globally, and by SDI quintile, both sexes, 2006 to 2016 .....                                                                          | 124 |
| eTable 15: Contribution of YLDs and YLLs to DALYs by cancer, global, both sexes, 2016 .....                                                                                            | 150 |
| eTable 16: Probability of developing cancer within selected age intervals, global, and by SDI quintile, by sex, 2006-2016 in % (odds) .....                                            | 151 |
| <br>                                                                                                                                                                                   |     |
| eFigure 1: Flowchart GBD cancer mortality, YLL estimation .....                                                                                                                        | 178 |
| eFigure 2: Flowchart GBD cancer incidence, prevalence, YLD estimation .....                                                                                                            | 179 |
| eFigure 3: Sociodemographic Index quintiles, 2016.....                                                                                                                                 | 180 |
| eFigure 4: Contribution of YLDs and YLLs to DALYs by cancer, global, both sexes, 2016.....                                                                                             | 181 |
| eFigure 5: Average annual percent change in age-standardized death and incidence rates between 2006 and 2016 for both sexes, by SDI quintile, all neoplasms .....                      | 182 |
| eFigure 6: Average annual percent change in age-standardized death and incidence rates between 2006 and 2016 for both sexes, by SDI quintile, tracheal, bronchus, and lung cancer..... | 183 |
| eFigure 7: Average annual percent change in age-standardized death and incidence rates between 2006 and 2016 for both sexes, by SDI quintile, colon and rectum cancer .....            | 184 |
| eFigure 8: Average annual percent change in age-standardized death and incidence rates between 2006 and 2016 for both sexes, by SDI quintile, breast cancer .....                      | 185 |
| eFigure 9: Average annual percent change in age-standardized death and incidence rates between 2006 and 2016, by SDI quintile, prostate cancer .....                                   | 186 |
| eFigure 10: Average annual percent change in age-standardized death and incidence rates between 2006 and 2016 for both sexes, by SDI quintile, stomach cancer .....                    | 187 |
| eFigure 11: Average annual percent change in age-standardized death and incidence rates between 2006 and 2016 for both sexes, by SDI quintile, liver cancer.....                       | 188 |

|                                                                                                                                                                                             |                                     |
|---------------------------------------------------------------------------------------------------------------------------------------------------------------------------------------------|-------------------------------------|
| eFigure 12: Average annual percent change in age-standardized death and incidence rates between 2006 and 2016, by SDI quintile, cervical cancer .....                                       | 189                                 |
| eFigure 13: Average annual percent change in age-standardized death and incidence rates between 2006 and 2016 for both sexes, by SDI quintile, leukemia.....                                | 190                                 |
| eFigure 14: Average annual percent change in age-standardized death and incidence rates between 2006 and 2016 for both sexes, by SDI quintile, non-Hodgkin lymphoma .....                   | 191                                 |
| eFigure 15: Cancer ranking by total incidence based on global level for developing and developed regions and all countries, both sexes, 2016.....                                           | 201                                 |
| eFigure 16: Cancer ranking by total mortality based on global level for developing and developed regions and all countries, both sexes, 2016 .....                                          | 210                                 |
| eFigure 17: Top-ranked cancers by absolute incident cases for all ages in males, 2016 .....                                                                                                 | 211                                 |
| eFigure 18: Top-ranked cancers by absolute incident cases for all ages in females, 2016 .....                                                                                               | 212                                 |
| eFigure 19: Top-ranked cancers by absolute deaths for all ages in males, 2016 .....                                                                                                         | 213                                 |
| eFigure 20: Top-ranked cancers by absolute deaths for all ages in females, 2016 .....                                                                                                       | 214                                 |
| eFigure 21: Global Decomposition of Changes in Cancer Incident Cases due to Population Growth, Population Aging, and Changes in Age-specific Incidence Rates, Both Sexes, 2006 to 2016..... | 215                                 |
| eFigure 22: Average annual change in age-standardized mortality rate between 2006 and 2016 for both sexes by SDI and cancer ( .....                                                         | <b>Error! Bookmark not defined.</b> |
| eFigure 23: Trends in Age-Standardized Incidence Rates for Tracheal, Bronchus, and Lung Cancer, 1990-2016, Female.....                                                                      | 216                                 |
| eFigure 24: Trends in Age-Standardized Incidence Rates for Tracheal, Bronchus, and Lung Cancer, 1990-2016, Male .....                                                                       | 216                                 |
| eFigure 25: Trends in Age-Standardized Incidence Rates for Colon and Rectum Cancer, 1990-2016, Female.....                                                                                  | 217                                 |
| eFigure 26: Trends in Age-Standardized Incidence Rates for Colon and Rectum Cancer, 1990-2016, Male .....                                                                                   | 217                                 |
| eFigure 27: Trends in Age-Standardized Incidence Rates for Breast Cancer, 1990-2016, Female.....                                                                                            | 218                                 |
| eFigure 28: Trends in Age-Standardized Incidence Rates for NMSC, 1990-2016, Female .....                                                                                                    | 218                                 |
| eFigure 29: Trends in Age-Standardized Incidence Rates for NMSC, 1990-2016, Male.....                                                                                                       | 219                                 |
| eFigure 30: Trends in Age-Standardized Incidence Rates for Prostate Cancer, 1990-2016, Male .....                                                                                           | 219                                 |
| eFigure 31: Trends in Age-Standardized Incidence Rates for Stomach Cancer, 1990-2016, Female .....                                                                                          | 220                                 |
| eFigure 32: Trends in Age-Standardized Incidence Rates for Stomach Cancer, 1990-2016, Male.....                                                                                             | 220                                 |
| eFigure 33: Trends in Age-Standardized Incidence Rates for Liver Cancer, 1990-2016, Female .....                                                                                            | 221                                 |
| eFigure 34: Trends in Age-Standardized Incidence Rates for Liver Cancer, 1990-2016, Male .....                                                                                              | 221                                 |
| eFigure 35: Trends in Age-Standardized Incidence Rates for Cervical Cancer, 1990-2016, Female .....                                                                                         | 222                                 |
| eFigure 36: Trends in Age-Standardized Incidence Rates for Leukemia, 1990-2016, Female.....                                                                                                 | 222                                 |
| eFigure 37: Trends in Age-Standardized Incidence Rates for Leukemia, 1990-2016, Male .....                                                                                                  | 223                                 |
| eFigure 38: Trends in Age-Standardized Incidence Rates for Non-Hodgkin lymphoma, 1990-2016, Female .....                                                                                    | 223                                 |
| eFigure 39: Trends in Age-Standardized Incidence Rates for Non-Hodgkin lymphoma, 1990-2016, Male .....                                                                                      | 224                                 |
| eFigure 40: Trends in Age-Standardized Incidence Rates for Esophageal Cancer, 1990-2016, Female... ..                                                                                       | 225                                 |
| eFigure 41: Trends in Age-Standardized Incidence Rates for Esophageal Cancer, 1990-2016, Male .....                                                                                         | 225                                 |
| eFigure 42: Trends in Age-Standardized Incidence Rates for Bladder Cancer, 1990-2016, Female.....                                                                                           | 226                                 |

|                                                                                                                    |     |
|--------------------------------------------------------------------------------------------------------------------|-----|
| eFigure 43: Trends in Age-Standardized Incidence Rates for Bladder Cancer, 1990-2016, Male .....                   | 226 |
| eFigure 44: Trends in Age-Standardized Incidence Rates for Pancreatic Cancer, 1990-2016, Female ....               | 227 |
| eFigure 45: Trends in Age-Standardized Incidence Rates for Pancreatic Cancer, 1990-2016, Male .....                | 227 |
| eFigure 46: Trends in Age-Standardized Incidence Rates for Uterine Cancer, 1990-2016, Female .....                 | 228 |
| eFigure 47: Trends in Age-Standardized Incidence Rates for Lip and oral cavity Cancer, 1990-2016, Female.....      | 228 |
| eFigure 48: Trends in Age-Standardized Incidence Rates for Lip and oral cavity Cancer, 1990-2016, Male .....       | 229 |
| eFigure 49: Trends in Age-Standardized Incidence Rates for Kidney Cancer, 1990-2016, Female .....                  | 229 |
| eFigure 50: Trends in Age-Standardized Incidence Rates for Kidney Cancer, 1990-2016, Male .....                    | 230 |
| eFigure 51: Trends in Age-Standardized Incidence Rates for Brain and nervous system cancer, 1990-2016, Female..... | 230 |
| eFigure 52: Trends in Age-Standardized Incidence Rates for Brain and nervous system cancer, 1990-2016, Male .....  | 231 |
| eFigure 53: Trends in Age-Standardized Incidence Rates for Melanoma, 1990-2016, Female.....                        | 231 |
| eFigure 54: Trends in Age-Standardized Incidence Rates for Melanoma, 1990-2016, Male .....                         | 232 |
| eFigure 55: Trends in Age-Standardized Incidence Rates for Ovarian Cancer, 1990-2016, Female .....                 | 232 |
| eFigure 56: Trends in Age-Standardized Incidence Rates for Thyroid Cancer, 1990-2016, Female.....                  | 233 |
| eFigure 57: Trends in Age-Standardized Incidence Rates for Thyroid Cancer, 1990-2016, Male .....                   | 233 |
| eFigure 58: Trends in Age-Standardized Incidence Rates for Larynx Cancer, 1990-2016, Female.....                   | 234 |
| eFigure 59: Trends in Age-Standardized Incidence Rates for Larynx Cancer, 1990-2016, Male .....                    | 234 |
| eFigure 60: Trends in Age-Standardized Incidence Rates for Gallbladder Cancer, 1990-2016, Female ..                | 235 |
| eFigure 61: Trends in Age-Standardized Incidence Rates for Gallbladder Cancer, 1990-2016, Male .....               | 235 |
| eFigure 62: Trends in Age-Standardized Incidence Rates for Other Pharynx Cancer, 1990-2016, Female .....           | 236 |
| eFigure 63: Trends in Age-Standardized Incidence Rates for Other Pharynx Cancer, 1990-2016, Male ..                | 236 |
| eFigure 64: Trends in Age-Standardized Incidence Rates for Multiple Myeloma, 1990-2016, Female ...                 | 237 |
| eFigure 65: Trends in Age-Standardized Incidence Rates for Multiple Myeloma, 1990-2016, Male .....                 | 237 |
| eFigure 66: Trends in Age-Standardized Incidence Rates for Nasopharynx Cancer, 1990-2016, Female                   | 238 |
| eFigure 67: Trends in Age-Standardized Incidence Rates for Nasopharynx Cancer, 1990-2016, Male ...                 | 238 |
| eFigure 68: Trends in Age-Standardized Incidence Rates for Hodgkin Lymphoma, 1990-2016, Female .                   | 239 |
| eFigure 69: Trends in Age-Standardized Incidence Rates for Hodgkin Lymphoma, 1990-2016, Male ....                  | 239 |
| eFigure 70: Trends in Age-Standardized Incidence Rates for Testicular Cancer, 1990-2016, Male .....                | 240 |
| eFigure 71: Trends in Age-Standardized Incidence Rates for Mesothelioma, 1990-2016, Female.....                    | 240 |
| eFigure 72: Trends in Age-Standardized Incidence Rates for Mesothelioma, 1990-2016, Male .....                     | 241 |

## Definition of indicator

The GBD cause list is organized in a hierarchy. Levels 1 and 2 represent general groupings. The broad group “neoplasms,” which includes all cancer causes, is at Level 2 under the Level 1 group Non-communicable diseases. Level 3 includes 29 cancer groups, and Level 4 includes 37 groups since in Level 4, leukemia, liver cancer, and non-melanoma skin cancer are further subdivided. In this publication, estimates for the GBD cancer groups, for both sexes, for the time from 1980 to 2016, and for the 5-year GBD age groups (0-5; 5-9; etc. until 95+) are presented for 195 countries or territories. All ICD9 codes pertaining to cancer (140-209) and ICD10 codes (C00-C96) except for Kaposi sarcoma (ICD10: C46) are included in these estimates.

eTable 4 and eTable 5 list all ICD codes and their respective GBD cause. Countries and territories reported can be found in eTable 7.

## Data sources

### Cancer incidence data sources

Cancer incidence was sought from individual cancer registries or aggregated databases of cancer registry data like “Cancer Incidence In Five Continents” (CI5),<sup>1-10</sup> EUREG,<sup>11</sup> or NORDCAN.<sup>12</sup> Data were excluded if they were not representative of the coverage population (e.g., hospital-based registries), if they did not cover all malignant neoplasms as defined in ICD9 (140-208) or ICD10 (C00-C96) (e.g., specialty cancer registry), if they did not include data for both sexes and all age groups, if the data were limited to years prior to 1980, or if the source did not provide details on the population covered. Preference was given to registries with national coverage over those with only local coverage, except those from countries where the GBD study provides subnational estimates. A list of the cancer registries included in our analysis and the years covered can be found in eTable 2. Additional metadata for each source are available in the online GBD citation tool, <http://ghdx.healthdata.org/gbd-2016/data-input-sources>.

### Mortality/incidence ratio data sources

Most cancer registries only report cancer incidence. However, if a cancer registry also reported cancer mortality, mortality data were also extracted from the source to be used in the mortality to incidence estimation. eTable 2 lists the registries used for the estimation of mortality-to-incidence ratios.

### Cancer mortality data sources

A detailed description of the data sources and processing steps for the cause of death database can be found in the appendix to the GBD 2016 paper “Global, regional, and national age-sex specific mortality for 264 causes of death, 1980–2016: a systematic analysis for the Global Burden of Disease Study 2016.”<sup>13</sup>

### Bias of categories of input data

Bias of the input data included for the COD database is described elsewhere.<sup>13</sup> Cancer registry data can be biased in multiple ways. A high proportion of ill-defined cancer cases in the registry data requires redistribution of these cases to other cancers, which introduces a potential for bias. Changes between coding systems can lead to artificial differences in disease estimates; however, we adjust for this bias by mapping the different coding systems to the GBD causes. Underreporting of cancers that require advanced diagnostic techniques (e.g., leukemia, brain, pancreatic, and liver cancer) can be an issue in cancer registries from low-income countries. On the other hand, misclassification of metastatic sites as primary cancer can lead to overestimation of cancer sites that are common sites for metastases like brain or liver. Since many cancer registries are located in urban areas, the representativeness of the

registry for the general population can also be problematic. The accuracy of mortality data reported in cancer registries usually depends on the quality of the vital registration system. If the vital registration system is incomplete or of poor quality, the mortality-to-incidence ratio can be biased to lower ratios.

### Data analysis

Flowcharts describing the conceptual overview of the data processing are available in eFigure 1 and eFigure 2.

#### Cancer registry data formatting

Cancer registry data went through multiple processing steps before integration with the COD database. First, the original data were transformed into standardized files, which included standardization of format, categorization, and registry names (#1 in eFigure 1).

Second, some cancer registries report individual codes as well as aggregated totals (e.g., C18, C19, and C20 are reported individually but the aggregated group of C18–C20 (colorectal cancer) is also reported in the registry data). The data processing step “subtotal recalculation” (#2 in flowchart) verifies these totals and subtracts the values of any individual codes from the aggregates.

In the third step (#3 in the flowchart), cancer registry incidence data and cancer registry mortality data are mapped to GBD causes. A different map is used for incidence and for mortality data because of the assumption that there are no deaths for certain cancers. One example is basal cell carcinoma of the skin. In the cancer registry incidence data, basal cell carcinoma is mapped to non-melanoma skin cancer (basal cell carcinoma). However, if basal cell skin cancer is recorded in the cancer registry mortality data, the deaths are instead mapped to non-melanoma skin cancer (squamous cell carcinoma) under the assumption that they were indeed misclassified squamous cell skin cancers. Other examples are benign or in situ neoplasms. Benign or in situ neoplasms found in the cancer registry incidence dataset were simply dropped from that dataset. The same neoplasms reported in a cancer registry mortality dataset were mapped to the respective invasive cancer (e.g., melanoma in situ in the cancer registry incidence dataset was dropped from the dataset; melanoma in situ in the cancer registry mortality dataset was mapped to melanoma). Mapping for incidence and mortality data can be found in eTable 4 and eTable 5.

In the fourth data processing step (#4 in the flowchart), cancer registry data were standardized to the GBD age groups. Age-specific incidence rates were generated using CI5, SEER, and NORDCAN data, while age-specific mortality rates were generated from the CoD data.<sup>13</sup> Age-specific weights were then generated by applying the age-specific rates to a given registry population that required age-splitting to produce the expected number of cases/deaths for that registry by age. The expected number of cases/deaths for each sex, age, and cancer were then normalized to 1, creating final, age-specific proportions. These proportions were then applied to the total number of cases/deaths by sex and cancer to get the age-specific number of cases/deaths.

In the rare case that the cancer registry only contained data for both sexes combined, the age-specific cases/deaths were split and re-assigned to separate sexes using the same weights that are used for the age-splitting process. Starting from the expected number of deaths, proportions were generated by sex for each age (e.g., if for ages 15-19 years old there are 6 expected deaths for males and 4 expected deaths for females, then 60% of the combined-sex deaths for ages 15-19 years would be assigned to males and the remaining 40% would be assigned to females).

In the fifth step (#5 in the flowchart), data for cause entries that are aggregates of GBD causes were redistributed. Examples of these aggregated causes include some registries reporting ICD10 codes C00-

C14 together as, “lip, oral cavity, and pharyngeal cancer.” These groups were broken down into subcauses that could be mapped to single GBD causes. In this example, those include lip and oral cavity cancer (C00-C08), nasopharyngeal cancer (C11), cancer of other parts of the pharynx (C09-C10, C12-C13), and “Malignant neoplasm of other and ill-defined sites in the lip, oral cavity, and pharynx” (C14). To redistribute the data, weights were created using the same method employed in age-sex splitting (see step four above). For the undefined code (C14 in the example) an “average all cancer” weight was used, which was generated by adding all cases from SEER/NORDCAN/CI5 and dividing those by the combined population. Then, proportions were generated by subcause for each aggregate cause as in the sex splitting example above (see step four). The total number of cases from the aggregated group (C00-C14) was recalculated for each subgroup and the undefined code (C14). C14 was then redistributed as a “garbage code” in step six. Distinct proportions were used for C46 (Kaposi sarcoma). C46 entries were redistributed as “other cancer” and HIV.

In the sixth step (#6 in the flowchart), unspecified codes (“garbage code”) were redistributed. Redistribution of cancer registry incidence and mortality data mirrored the process of the redistribution used in the cause of death database and has not changed compared to GBD 2013.<sup>13</sup>

In the seventh step (#7 in the flowchart), duplicate or redundant sources were removed from the processed cancer registry dataset. Duplicate sources were present if, for example, the cancer registry was part of the CI5 database but we also had data from the registry directly. Redundancies occurred and were removed as described in “Inclusion and Exclusion Criteria,” where more detailed data were available, or when national registry data could replace regionally representative data. From here, two parallel selection processes were run to generate input data for the MI models and to generate incidence for final mortality estimation. Higher priority was given to registry data from the most standardized source when creating the final incidence input, whereas for the MI model input, only sources that reported incidence and mortality were used. This is different from GBD 2015, where mortality and incidence could come from different sources as long as they covered the same population. In the eighth step (#8 in the flowchart), the processed incidence and mortality data from cancer registries were matched by cancer, age, sex, year, and location to generate MI ratios. These MI ratios were used as input for a three-step modeling approach using the general GBD ST-GPR approach with SDI as a covariate in the linear step mixed effects model using a logit link function. Predictions were made without the random effects. The ST-GPR model has three main hyper-parameters that control for smoothing across time, age, and geography. The time adjustment parameter ( $\lambda$ ) was set to 2, which aims to borrow strength from neighboring time points (i.e., the exposure in this year is highly correlated with exposure in the previous year but less so further back in time). The age adjustment parameter  $\omega$  was set to 0.5, which borrows strength from data in neighboring age groups. The space adjustment parameter  $\xi$  was set to 0.95 in locations with data and to 0.5 in locations without data (the higher  $\xi$  was applied when at least one age-sex group in the country of estimation had at least five unique data points. The lower  $\xi$  was applied when estimating data-scarce countries). Zeta aims to borrow strength across the hierarchy of geographical locations.<sup>13</sup> For the amplitude parameter in the Gaussian process regression we used 2 and for the scale we used a value of 15.

We have modified the approach to estimate MI ratios compared to GBD 2015. Since for GBD 2015 MI ratio predictions for some cancers yielded similar predictions for low-SDI countries without data as for high-SDI countries, we refined the estimation process. Inclusion criteria for the MI ratio input data were changed to only include mortality and incidence data if they were reported by the same source. We excluded MI ratios reported in the CI5<sup>4,4-10</sup> since mortality data used for the calculation of these MI ratios by definition has to be independent from the cancer registry. We also revised the outliering



process and excluded data based on the SDI quintile categorization rather than on development status. For each cancer, MI ratios from locations in SDI quintiles 1-4 (low to high-middle SDI) were dropped if they were below the median of MI ratios from locations in SDI quintile 5 (high SDI). We also dropped MI ratios from locations in SDI quintiles 1-4 if the MI ratios were above the third quartile + 1.5 \* IQR (inter-quartile range). We dropped all MIR that were based on less than 25 cases to avoid noise due to small numbers except for mesothelioma and acute lymphoid leukemia, where we dropped MIR that were based on less than 10 cases because of lower data availability for these two cancers. We also aggregated incidence and mortality to the youngest 5-year age bin where we had at least 50 data points to avoid MIR predictions in young age groups that were based on few data points. The MIR in the age-bin that was used to aggregate MIR was used to backfill the MIR for younger age groups.

Since MI ratios can be above 1, especially in older age groups and cancers with low cure rates, we used the 95<sup>th</sup> percentile of the cleaned dataset that only included MIR that were based on 50 or more cases to cap the MIR input data. This “upper cap” was used to allow MIR over 1 but to constrain the MIR to a maximum level. To run the logit model, the input data were divided by the upper caps and model predictions after ST-GPR was rescaled by multiplying them by the upper caps.

Upper caps used for GBD 2016 were the following:

| Age group | Maximum MIR |
|-----------|-------------|
| 0-4       | 0.57        |
| 5-9       | 0.69        |
| 10-14     | 0.81        |
| 15-19     | 0.84        |
| 20-24     | 0.72        |
| 25-29     | 0.62        |
| 30-34     | 0.69        |
| 35-39     | 0.78        |
| 40-44     | 0.86        |
| 45-49     | 0.89        |
| 50-54     | 0.92        |
| 55-59     | 0.95        |
| 60-64     | 0.99        |
| 65-69     | 1.04        |
| 70-74     | 1.10        |
| 75-79     | 1.17        |
| 80+       | 1.32        |

To constrain the model at the lower end, we used the 5<sup>th</sup> percentile of the cancer-specific cleaned MIR input data to replace all model predictions with this lower cap.

Final MI ratios were matched with the cancer registry incidence dataset in the ninth step (#9 in the flowchart) to generate mortality estimates (Incidence \* Mortality/Incidence = Mortality) (#10 in the flowchart). The final mortality estimates were then uploaded into the COD database (#11 in the flowchart). Cancer-specific mortality modeling then followed the general CODEm process.

## Cause of death database formatting

Formatting of data sources for the cause of death database has been described in detail elsewhere (#11 in the flowchart).<sup>13</sup>

## CODEm models

Mortality estimates for each cancer were generated using CODEm (#12 in the flowchart). Methods describing the CODEm approach have been described elsewhere.<sup>13,14</sup> In brief, the CODEm modeling approach is based on the principles that all types of available data should be used even if data quality varies; that individual models but also ensemble models should be tested for their predictive validity; and that the best model or sets of models should be chosen based on the out of sample predictive validity. Models were run separately for countries with extensive and complete vital registration data and countries with less VR data to prevent an inflation in the uncertainty around the estimates in “data-rich” countries. Covariates were selected based on a possible predictive relationship between the covariate and the specific cancer mortality. Level 1 covariates have a proven strong relationship with the outcome such as etiological or biological roles. Level 2 covariates have a strong relationship but not a direct biological link. Covariates that are more distal in the causal chain or are mediated through Level 1 or 2 covariates are categorized as Level 3.<sup>14</sup> Differences in covariate selection between GBD 2015 and GBD 2016 by cause and direction of the covariate can be found in eTable 9.

## Liver cancer etiology split models

To find the proportion of liver cancer cases due to the four etiology groups included in GBD (1. Liver cancer due to hepatitis B, 2. Liver cancer due to hepatitis C, 3. Liver cancer due to alcohol, 4. Liver cancer due to other causes), a systematic literature search was performed on 10/24/2016 in PubMed using the search string (*"liver neoplasms"[All Fields] OR "HCC"[All Fields] OR "liver cancer"[All Fields] OR "Carcinoma, Hepatocellular"[Mesh]) AND (("hepatitis B"[All Fields] OR "Hepatitis B"[Mesh] OR "Hepatitis B virus"[Mesh] OR "Hepatitis B Antibodies"[Mesh] OR "Hepatitis B Antigens"[Mesh]) OR ("hepatitis C"[All Fields] OR "Hepatitis C"[Mesh] OR "hepatitis C antibodies"[MESH] OR "Hepatitis C Antigens"[Mesh] OR "Hepacivirus"[Mesh]) OR ("alcohol"[All Fields] OR "Alcohol Drinking"[Mesh] OR "Alcohol-Related Disorders"[Mesh] OR "Alcoholism"[Mesh] OR "Alcohol-Induced Disorders"[Mesh])) AND ("2015"[PDAT] : "2016"[PDAT]) NOT (animals[MeSH] NOT humans[MeSH])*). Studies were included if the study population was representative of the liver cancer population for the respective location. For each study the proportions of liver cancer due to the three specific risk factors were calculated. Remaining risk factors were included under a combined “other” group. Cryptogenic cases were only included if other etiologies like viral hepatitis or alcoholic cirrhosis had been excluded. If multiple risk factors were reported for an individual patient these were apportioned proportionally to the individual risk factors. The proportion data found through the systematic literature review were used as input for four separate DisMod-MR 2.1 models to determine the proportion of liver cancers due to the four subgroups for all locations, both sexes, and all age groups (step #16 in the flowchart). A study covariate was used for publications that only assessed liver cancer in a cirrhotic population. The reference, or “gold standard,” that was used for crosswalking was the compilation of all studies that assessed the etiology of liver cancer in a general population. A study covariate was also used for studies that only assessed hepatocellular carcinoma (HCC) as opposed to all primary liver cancers. The reference or “gold standard” that was used for crosswalking was the compilation of all studies that assessed the etiology of liver cancer for the population with all primary liver cancers.

For liver cancer due to hepatitis C and hepatitis B, a prior value of 0 was set between age 0 and 0.01. For

liver cancer due to alcohol a prior value of 0 was set for ages 0 to 5 years. For liver cancer due to hepatitis C, hepatitis C (IgG) seroprevalence was used as a covariate as well as a covariate for alcohol (liters per capita) and hepatitis B prevalence (HBsAg seroprevalence), forcing a negative relationship between the alcohol and hepatitis B covariate and the outcome of liver cancer due to hepatitis C proportion. For liver cancer due to hepatitis B, seroprevalence of HBsAg was used as a covariate as well as a covariate for alcohol and hepatitis C IgG seroprevalence, forcing a negative relationship between the alcohol and hepatitis C covariate and the outcome of liver cancer due to hepatitis B proportion. For liver cancer due to alcohol, alcohol (liters per capita) was used as a covariate as well as a covariate for proportion of alcohol abstainers, hepatitis B and hepatitis C seroprevalence, forcing a negative relationship between the proportion of alcohol abstainers, hepatitis B and hepatitis C covariates and the outcome of liver cancer due to alcohol proportion. All covariates used were modeled independently. To ensure consistency between cirrhosis and liver cancer estimates and to take advantage of the data for the respective other related cause (e.g., liver cancer due to hepatitis C and the related cause cirrhosis due to hepatitis C), we generated covariates from the liver cancer proportion models that we used in the cirrhosis etiology proportion models. We then created covariates from the cirrhosis etiology proportion models and used those in the liver cancer etiology models.

Since the proportion models are run independently of each other, the final proportion models were scaled to sum to 100% within each age, sex, year, and location, by dividing each proportion by the sum of the four (step # 17). For the liver cancer subtype mortality estimates, we multiplied the parent cause “liver cancer” by the corresponding scaled proportions (step # 18). Single cause estimates were adjusted to fit into the separately modeled all-cause mortality in the process CodCorrect.

### CodCorrect

CODEm models estimate the individual cause-level mortality without taking into account the all-cause mortality (#13 in the flowchart). To ensure that all single causes add up to the all-cause mortality and that all child-causes add up to the parent cause, an algorithm called “CodCorrect” is used (#14 and #15 in the flowchart). Details regarding the algorithm can be found elsewhere.<sup>13</sup>

### Incidence estimation

GBD cancer incidence estimates were generated by dividing final mortality estimates (after CodCorrect adjustment) by the MI ratio for the specific cancer (#1 eFigure 2). To propagate uncertainty from the MI ratios and the mortality estimates to incidence, this process was done at the 1,000-draw level. It was assumed that uncertainty in the MI ratio is independent of uncertainty in the estimated age-specific death rates.

### Prevalence and YLD estimation

Prevalence is estimated as 10-year prevalence for all cancers as in GBD 2013 and GBD 2015.<sup>15</sup> To estimate cancer prevalence, relative cancer survival was estimated by scaling cancer-specific survival between a “best case” and “worst case” survival. The methods and input data used to generate the best and worst case survival as well as to scale countries between these boundaries remained the same as for the GBD 2013 and GBD 2015 studies (# 2, 3, and 5 in the flowchart).<sup>15</sup> Since the cause “other leukemia” was added for GBD 2016, survival data were updated using SEER 1973 survival data for “other leukemia” as the worst-case scenario and SEER 2010 survival data as the best-case survival. To transform relative to absolute survival (adjusting for background mortality) GBD 2016 lifetables were used (# 6 and 7 in the flowchart).<sup>16</sup> The access to cancer care variable to scale countries between the

best and worst case survival was estimated using the same method as for GBD 2013 and GBD 2015 (# 4 in the flowchart):<sup>15</sup>

$$\text{Access to care} = 1 - \frac{\text{Age standardized MI ratio}_{cys} - \text{Age standardized MI ratio}_{\min}}{\text{Age standardized MI ratio}_{\max} - \text{Age standardized MI ratio}_{\min}}$$

c=country; y=year; s=sex; Age-standardized MI ratio<sub>min</sub>=lowest MI ratio for all countries and years; Age-standardized MI ratio<sub>max</sub>=highest MI ratio for all countries and years

Duration of the treatment phases (1. diagnosis and primary therapy; 2. Controlled phases; 3. Metastatic phase; 4. Terminal phase) remained the same as for GBD 2013 and GBD 2015, with the exception of the “other leukemia” cause, which was added for GBD 2016 (eTable 12). Total prevalence time was divided into phases 1, 3, and 4 for the population that died within 10 years, and the remaining prevalence was attributed to the controlled phase. For the population that survived beyond 10 years, prevalence person time was attributed to phase 1 and phase 2 (#8 in the flowchart). YLDs were calculated by multiplying each phase with the respective disability weight (eTable 13). To generate the total YLDs for each cancer (with the exception of cancers where additional disability is added due to procedures – see next paragraph) the YLDs for each cancer sequela were added (step 13 in eFigure 2).

Additional disability was estimated for breast cancer (disability due to mastectomy), larynx cancer (disability due to laryngectomy), colon and rectum cancer (disability due to stoma), bladder cancer (disability due to incontinence), and prostatectomy (disability due to incontinence and impotence) (#10 in eFigure 2). Hospital data were used to estimate the number of cancer patients undergoing mastectomy, laryngectomy, stoma, prostatectomy, and cystectomy. These proportions remained the same as in GBD 2013 and GBD 2015 and were used as input for proportion models that were run in DisMod-MR 2.0 (#9 in eFigure 2).<sup>15,17</sup> The procedure proportions (proportion of cancer population that undergoes procedures) from hospital data was used as input for a proportion model in DisMod-MR 2.0 in order to estimate the proportions for all locations, by age, and by sex.

Since colostomy or ileostomy procedures are done for reasons other than cancer, a literature review was done to determine the proportion of ostomies due to colorectal cancer. The “all cause” colostomy proportions were multiplied by 0.58 based on the results of the literature review showing that on average 58% of ostomies are done for colorectal cancer.<sup>18–20</sup>

The final procedure proportions were applied to the incidence cases of the respective cancers and multiplied with the proportion of the incidence population surviving for 10 years to determine the incident cases of the cancer population that underwent procedures. These incident cases were used again as an input for DisMod-MR 2.1, with a remission specification of zero and an excess mortality rate prior of 0 to 0.1. This approach was different compared to GBD 2015, where we used the cause-specific mortality of the specific cancer to obtain prevalence of the sequela. The approach was changed since the mortality for the population undergoing disease-specific procedures (e.g., mastectomy for breast cancer) is likely closer to the general population after they have survived for a period of time compared to the cause-specific mortality of the underlying disease (e.g., breast cancer).

Since disability associated with prostatectomy comes from impotence and incontinence and not from the prostatectomy itself, 18% of the prostatectomy prevalence was assumed to be incontinent and 55% was assumed to be impotent based on a literature review done for GBD 2013.<sup>21–28</sup>

Since all sequelae for a cause need to be mutually exclusive, the controlled phase for the cancers with additional procedure-related disability was adjusted to only include the population without procedure-related disability (= controlled phases prevalence of the total population – controlled phase prevalence of the proportion that experienced procedure related disability) (#11 in eFigure 2). The disability weight for the prevalence of the population that experiences additional disability was adjusted to reflect the combined disability of the controlled phase as well as the procedure.

Lastly, the procedure sequelae prevalence and general sequelae prevalence were multiplied with disability weights (eTable 13) for the procedures to obtain the number of YLDs (#10 in eFigure 2). The sum of these YLDs are the final YLD estimate associated with each cancer.

### Probability of cancer

The cumulative probability of developing cancer for certain age groups and an approximated lifetime risk for all cancer groups (age 0 to 79) as well as the odds of developing cancer for 2016 were calculated. The method use does not take into account competing risks of death. The cancer risk is approximated using the following formula<sup>29</sup>:

$$\text{Cumulative risk} = 1 - e^{-\text{cumulative rate}}$$

## References

1. Doll R, Payne P, Waterhouse J. *Cancer Incidence in Five Continents I*. Geneva: Union Internationale Contre le Cancer; 1966.
2. Doll R, Muir C, Waterhouse J. *Cancer Incidence in Five Continents II*. Geneva: Union Internationale Contre le Cancer, Geneva; 1970.
3. Waterhouse J, Muir C, Correa P, Powell J. *Cancer Incidence in Five Continents III*. Lyon: IARC; 1976.
4. Waterhouse J, Muir C, Shanmugaratnam K, Powell J. *Cancer Incidence in Five Continents IV*. Lyon: IARC; 1982.
5. Muir C, Mack T, Powell J, Whelan S. *Cancer Incidence in Five Continents V*. Lyon: IARC; 1987.
6. Parkin D, Muir C, Whelan S, Gao Y, Ferlay J, Powell J. *Cancer Incidence in Five Continents VI*. Lyon: IARC; 1992.
7. Parkin D, Whelan S, Ferlay J, Raymond L, Young J. *Cancer Incidence in Five Continents VII*. Lyon: IARC; 1997.
8. Parkin D, Whelan S, Ferlay J, Teppo L, Thomas D. *Cancer Incidence in Five Continents VIII*. Lyon: IARC; 2002.
9. Curado M, Edwards B, Shin H, et al. *Cancer Incidence in Five Continents IX*. Lyon: IARC; 2007. <http://www.iarc.fr/en/publications/pdfs-online/epi/sp160/CI5vol9-A.pdf>.
10. Forman D, Bray F, Brewster D, et al. Cancer Incidence in Five Continents X. <http://ci5.iarc.fr>. Published 2013.
11. Steliarova-Foucher E, O'Callaghan M, Ferlay J, Masuyer E, Forman D, Comber H, Bray F. European Cancer Observatory: Cancer Incidence, Mortality, Prevalence and Survival in Europe. International Agency for Research on Cancer. <http://eco.iarc.fr>. Accessed August 10, 2016.
12. Engholm G, Ferlay J, Christensen N, et al. NORDCAN--a Nordic tool for cancer information, planning, quality control and research. *Acta Oncol*. 2010;49(5):725-736. doi:10.3109/02841861003782017.
13. Abajobir AA, Abbafati C, Abbas KM, et al. Global, regional, and national age-sex specific mortality for 264 causes of death, 1980–2016: a systematic analysis for the Global Burden of Disease Study 2016. *The Lancet*. 2017;390(10100):1151-1210. doi:10.1016/S0140-6736(17)32152-9.
14. Foreman KJ, Lozano R, Lopez AD, Murray CJ. Modeling causes of death: an integrated approach using CODEm. *Popul Health Metr*. 2012;10(1):1. doi:10.1186/1478-7954-10-1.
15. Fitzmaurice C, Dicker D, Pain A, et al. The Global Burden of Cancer 2013. *JAMA Oncol*. May 2015. doi:10.1001/jamaoncol.2015.0735.
16. GBD Mortality and Causes of Death Collaborators. Global, regional, and national life expectancy, all-cause and cause specific mortality for 249 causes of death, 1980–2015: a systematic analysis for the Global Burden of Disease Study 2015. *The Lancet*. August 2016.

17. Flaxman AD, Vos T, Murray C. *An Integrative MetaRegression Framework for Descriptive Epidemiology*. University of Washington Press; 2015.
18. Canova C, Giorato E, Roveron G, Turrini P, Zanotti R. Validation of a stoma-specific quality of life questionnaire in a sample of patients with colostomy or ileostomy. *Colorectal Dis Off J Assoc Coloproctology G B Irel*. 2013;15(11):e692-698. doi:10.1111/codi.12324.
19. Caricato M, Ausania F, Ripetti V, Bartolozzi F, Campoli G, Coppola R. Retrospective analysis of long-term defunctioning stoma complications after colorectal surgery. *Colorectal Dis Off J Assoc Coloproctology G B Irel*. 2007;9(6):559-561. doi:10.1111/j.1463-1318.2006.01187.x.
20. Erwin-Toth P, Thompson SJ, Davis JS. Factors impacting the quality of life of people with an ostomy in North America: results from the Dialogue Study. *J Wound Ostomy Cont Nurs Off Publ Wound Ostomy Cont Nurses Soc WOCN*. 2012;39(4):417-422; quiz 423-424. doi:10.1097/WON.0b013e318259c441.
21. Catalona WJ, Carvalhal GF, Mager DE, Smith DS. Potency, continence and complication rates in 1,870 consecutive radical retropubic prostatectomies. *J Urol*. 1999;162(2):433-438.
22. Donnellan SM, Duncan HJ, MacGregor RJ, Russell JM. Prospective assessment of incontinence after radical retropubic prostatectomy: objective and subjective analysis. *Urology*. 1997;49(2):225-230. doi:10.1016/S0090-4295(96)00451-7.
23. Eastham JA, Kattan MW, Rogers E, et al. Risk factors for urinary incontinence after radical prostatectomy. *J Urol*. 1996;156(5):1707-1713.
24. Kundu SD, Roehl KA, Eggener SE, Antenor JAV, Han M, Catalona WJ. Potency, continence and complications in 3,477 consecutive radical retropubic prostatectomies. *J Urol*. 2004;172(6 Pt 1):2227-2231.
25. Potosky AL, Davis WW, Hoffman RM, et al. Five-Year Outcomes After Prostatectomy or Radiotherapy for Prostate Cancer: The Prostate Cancer Outcomes Study. *JNCI J Natl Cancer Inst*. 2004;96(18):1358-1367. doi:10.1093/jnci/djh259.
26. Sacco E, Prayer-Galetti T, Pinto F, et al. Urinary incontinence after radical prostatectomy: incidence by definition, risk factors and temporal trend in a large series with a long-term follow-up. *BJU Int*. 2006;97(6):1234-1241. doi:10.1111/j.1464-410X.2006.06185.x.
27. Stanford JL, Feng Z, Hamilton AS, et al. Urinary and sexual function after radical prostatectomy for clinically localized prostate cancer: the Prostate Cancer Outcomes Study. *JAMA*. 2000;283(3):354-360.
28. Walsh PC, Marschke P, Ricker D, Burnett AL. Patient-reported urinary continence and sexual function after anatomic radical prostatectomy. *Urology*. 2000;55(1):58-61.
29. Esteve J, Benhamou E, Raymond L. *Descriptive Epidemiology*. Vol VI. IARC Scientific Publications No.128. Lyon, France: IARC Publications; 1994.



30. Neal RD, Din NU, Hamilton W, et al. Comparison of cancer diagnostic intervals before and after implementation of NICE guidelines: analysis of data from the UK General Practice Research Database. *Br J Cancer*. 2014;110(3):584-592. doi:10.1038/bjc.2013.791.
31. *Surveillance, Epidemiology, and End Results (SEER) Program (Www.seer.cancer.gov) SEER\*Stat Database: Incidence - SEER 18 Regs Research Data + Hurricane Katrina Impacted Louisiana Cases, Nov 2012 Sub (1973-2010 Varying) - Linked To County Attributes - Total U.S., 1969-2011 Counties, National Cancer Institute, DCCPS, Surveillance Research Program, Surveillance Systems Branch, Released April 2013, Based on the November 2012 Submission.*
32. Allgar VL, Neal RD. Delays in the diagnosis of six cancers: analysis of data from the National Survey of NHS Patients: Cancer. *Br J Cancer*. 2005;92(11):1959-1970. doi:10.1038/sj.bjc.6602587.
33. Neal RD, Cannings-John R, Hood K, et al. Excision of malignant melanomas in North Wales: effect of location and surgeon on time to diagnosis and quality of excision. *Fam Pract*. 2008;25(4):221-227. doi:10.1093/fampra/cmn036.
34. Nolan RC, Chan MT-L, Heenan PJ. A clinicopathologic review of lethal nonmelanoma skin cancers in Western Australia. *J Am Acad Dermatol*. 2005;52(1):101-108. doi:10.1016/j.jaad.2004.08.016.
35. Kewalramani T, Nimer SD, Zelenetz AD, et al. Progressive disease following autologous transplantation in patients with chemosensitive relapsed or primary refractory Hodgkin's disease or aggressive non-Hodgkin's lymphoma. *Bone Marrow Transplant*. 2003;32(7):673-679. doi:10.1038/sj.bmt.1704214.
36. Esteban D, Tovar N, Jiménez R, et al. Patients with relapsed/refractory chronic lymphocytic leukaemia may benefit from inclusion in clinical trials irrespective of the therapy received: a case-control retrospective analysis. *Blood Cancer J*. 2015;5:e356. doi:10.1038/bcj.2015.78.

eTable 1: GATHER Guidelines checklist

| <b>Objectives and funding</b>                                                                                                                                                                                                                                                                                                                                                               | <b>Reported in the manuscript/appendix</b>                                                                                                 |
|---------------------------------------------------------------------------------------------------------------------------------------------------------------------------------------------------------------------------------------------------------------------------------------------------------------------------------------------------------------------------------------------|--------------------------------------------------------------------------------------------------------------------------------------------|
| 1 Define the indicator(s), populations (including age, sex, and geographic entities), and time period(s) for which estimates were made.                                                                                                                                                                                                                                                     | See appendix: "Definition of indicator"                                                                                                    |
| 2 List the funding sources for the work.                                                                                                                                                                                                                                                                                                                                                    | See main manuscript                                                                                                                        |
| <b>Data Inputs</b>                                                                                                                                                                                                                                                                                                                                                                          |                                                                                                                                            |
| <b>For all data inputs from multiple sources that are synthesized as part of the study:</b>                                                                                                                                                                                                                                                                                                 |                                                                                                                                            |
| 3 Describe how the data were identified and how the data were accessed.                                                                                                                                                                                                                                                                                                                     | See appendix: "Data sources"                                                                                                               |
| 4 Specify the inclusion and exclusion criteria. Identify all ad-hoc exclusions.                                                                                                                                                                                                                                                                                                             | See appendix: "Data sources"                                                                                                               |
| 5 Provide information about all included data sources and their main characteristics. For each data source used, report reference information or contact name/institution, population represented, data collection method, year(s) of data collection, sex and age range, diagnostic criteria or measurement method, and sample size, as relevant.                                          | <a href="http://ghdx.healthdata.org/gbd-2016/data-input-sources">http://ghdx.healthdata.org/gbd-2016/data-input-sources</a>                |
| 6 Identify and describe any categories of input data that have potentially important biases (e.g., based on characteristics listed in item 5).                                                                                                                                                                                                                                              | See appendix: "Bias of categories of input data"                                                                                           |
| <b>For data inputs that contribute to the analysis but were not synthesized as part of the study:</b>                                                                                                                                                                                                                                                                                       |                                                                                                                                            |
| 7 Describe and give sources for any other data inputs.                                                                                                                                                                                                                                                                                                                                      | <a href="http://ghdx.healthdata.org/gbd-2016/data-input-sources">http://ghdx.healthdata.org/gbd-2016/data-input-sources</a>                |
| <b>For all data inputs:</b>                                                                                                                                                                                                                                                                                                                                                                 |                                                                                                                                            |
| 8 Provide all data inputs in a file format from which data can be efficiently extracted (e.g., a spreadsheet rather than a PDF), including all relevant meta-data listed in item 5. For any data inputs that cannot be shared because of ethical or legal reasons, such as third-party ownership, provide a contact name or the name of the institution that retains the right to the data. | <a href="http://ghdx.healthdata.org/gbd-2016/data-input-sources">http://ghdx.healthdata.org/gbd-2016/data-input-sources</a>                |
| <b>DATA ANALYSIS</b>                                                                                                                                                                                                                                                                                                                                                                        |                                                                                                                                            |
| 9 Provide a conceptual overview of the data analysis method. A diagram may be helpful.                                                                                                                                                                                                                                                                                                      | See eFigure 1: Flowchart GBD cancer mortality, YLL estimation<br>See eFigure 2: Flowchart GBD cancer incidence, prevalence, YLD estimation |
| 10 Provide a detailed description of all steps of the analysis, including mathematical formulae. This description should cover, as relevant, data cleaning, data pre-processing, data adjustments and weighting of data sources, and mathematical or statistical model(s).                                                                                                                  | See appendix: "Data analysis"                                                                                                              |
| 11 Describe how candidate models were evaluated and how the final model(s) were selected.                                                                                                                                                                                                                                                                                                   | See appendix "CODEm models"<br>See eTable 8: Covariates selected for CODEm for each GBD cancer group                                       |

|                                                                                                                                                                    |                                                                                                                                                                                                      |
|--------------------------------------------------------------------------------------------------------------------------------------------------------------------|------------------------------------------------------------------------------------------------------------------------------------------------------------------------------------------------------|
|                                                                                                                                                                    | and expected direction of covariate                                                                                                                                                                  |
| 12 Provide the results of an evaluation of model performance, if done, as well as the results of any relevant sensitivity analysis.                                | See eTable 10: Results for CODEm model testing                                                                                                                                                       |
| 13 Describe methods of calculating uncertainty of the estimates. State which sources of uncertainty were, and were not, accounted for in the uncertainty analysis. | See appendix “Data analysis”                                                                                                                                                                         |
| 14 State how analytic or statistical source code used to generate estimates can be accessed.                                                                       | <a href="http://ghdx.healthdata.org/gbd-2016-code">http://ghdx.healthdata.org/gbd-2016-code</a>                                                                                                      |
| <b>RESULTS AND DISCUSSION</b>                                                                                                                                      |                                                                                                                                                                                                      |
| 15 Provide published estimates in a file format from which data can be efficiently extracted.                                                                      | GBD 2016 estimates are available online ( <a href="http://vizhub.healthdata.org/gbd-compare">http://vizhub.healthdata.org/gbd-compare</a> ).                                                         |
| 16 Report a quantitative measure of the uncertainty of the estimates (e.g., uncertainty intervals).                                                                | Done                                                                                                                                                                                                 |
| 17 Interpret results in light of existing evidence. If updating a previous set of estimates, describe the reasons for changes in estimates.                        | eTable 2: Sources for cancer incidence and mortality-to-incidence ratio data by country, year, and registry<br>eTable 9: Comparison of GBD 2015 and GBD 2016 covariates used and level of covariates |
| 18 Discuss limitations of the estimates. Include a discussion of any modelling assumptions or data limitations that affect interpretation of the estimates.        | See main manuscript “Limitations”                                                                                                                                                                    |

eTable 2: Sources for cancer incidence and mortality-to-incidence ratio data by country, year, and registry

| Location              | Registry              | Years available from registry | Years used for incidence | Years available for MI ratio | Years used for MI ratio |
|-----------------------|-----------------------|-------------------------------|--------------------------|------------------------------|-------------------------|
| Algeria               | Algiers               | 1993-1997                     | 5                        | 1993-1997                    | 0                       |
| Algeria               | Batna                 | 2000-2006                     | 7                        | 2000-2006                    | 0                       |
| Algeria               | Oran                  | 2005-2006                     | 2                        | 2005-2006                    | 0                       |
| Algeria               | Setif                 | 1986-2007                     | 18                       | 1986-2007                    | 0                       |
| Antilles except Aruba | Antilles except Aruba | 1973-1982                     | 0                        | NA                           | NA                      |
| Argentina             | Bahia Blanca          | 1993-2007                     | 15                       | 1993-2007                    | 0                       |
| Argentina             | Concordia             | 1990-1997                     | 10                       | 1990-1997                    | 0                       |
| Argentina             | Cordoba               | 2003-2007                     | 4                        | 2004-2007                    | 0                       |
| Argentina             | Mendoza               | 2003-2007                     | 5                        | 2003-2007                    | 0                       |
| Argentina             | Tierra del Fuego      | 2003-2007                     | 5                        | 2003-2007                    | 0                       |
| Australia             | Capital Territory     | 1978-2007                     | 25                       | 1983-2007                    | 0                       |
| Australia             | National Registry     | 1982-2007                     | 26                       | 1968-2007                    | 26                      |
| Australia             | New South Wales       | 1973-2007                     | 25                       | 1983-2007                    | 0                       |
| Australia             | Northern Territory    | 1993-2007                     | 10                       | 1998-2007                    | 0                       |
| Australia             | Queensland            | 1982-2007                     | 15                       | 1993-2007                    | 0                       |
| Australia             | South Australia       | 1977-2007                     | 31                       | 1977-2007                    | 0                       |
| Australia             | Tasmania              | 1978-2007                     | 30                       | 1978-2007                    | 0                       |
| Australia             | Victoria              | 1982-2007                     | 25                       | 1983-2007                    | 0                       |
| Australia             | Western Australia     | 1982-2007                     | 25                       | 1983-2007                    | 0                       |
| Austria               | National Registry     | 1983-2010                     | 31                       | 1983-2010                    | 7                       |
| Austria               | Salzburg              | NA                            | NA                       | 1999-2006                    | 0                       |
| Austria               | Tyrol                 | 1988-2007                     | 0                        | 1988-2007                    | 0                       |
| Austria               | Vorarlberg            | 1993-2007                     | 0                        | 1993-2007                    | 0                       |
| Bahrain               | National Registry     | 1998-2007                     | 10                       | 1998-2007                    | 0                       |
| Belarus               | National Registry     | 1983-2007                     | 25                       | 1983-2007                    | 0                       |
| Belgium               | Antwerp               | 1998-2002                     | 5                        | 1998-2002                    | 0                       |

| Location | Registry                | Years available from registry | Years used for incidence | Years available for MI ratio | Years used for MI ratio |
|----------|-------------------------|-------------------------------|--------------------------|------------------------------|-------------------------|
| Belgium  | Flanders                | 1998-2001                     | 4                        | 1998-2001                    | 0                       |
| Belgium  | Flanders except Limburg | 1997-1998                     | 2                        | 1997-1998                    | 0                       |
| Belgium  | Limburg                 | 1997-1998                     | 2                        | 1997-1998                    | 0                       |
| Belgium  | National Registry       | 2003-2010                     | 7                        | 2003-2010                    | 0                       |
| Bermuda  | Bermuda                 | 1983-1987                     | 5                        | 1983-1987                    | 0                       |
| Brazil   | Aracaju                 | 1996-2012                     | 17                       | 1996-2012                    | 0                       |
| Brazil   | Barretos                | 2008-2013                     | 6                        | 2008-2013                    | 0                       |
| Brazil   | Belem                   | 1989-2009                     | 17                       | 1989-2009                    | 0                       |
| Brazil   | Belo Horizonte          | 2000-2008                     | 9                        | 2000-2008                    | 0                       |
| Brazil   | Brasilia                | 1998-2001                     | 4                        | 1998-2001                    | 0                       |
| Brazil   | Campinas                | 1991-2005                     | 15                       | 1991-2005                    | 0                       |
| Brazil   | Campo Grande            | 2000-2009                     | 6                        | 2000-2009                    | 0                       |
| Brazil   | Cuiaba                  | 2000-2007                     | 8                        | 2000-2007                    | 0                       |
| Brazil   | Curitiba                | 1998-2010                     | 13                       | 1998-2010                    | 0                       |
| Brazil   | Distrito Federal        | 1999-2002                     | 4                        | 1999-2002                    | 0                       |
| Brazil   | Espirito Santo          | 1997-2012                     | 16                       | 1997-2012                    | 0                       |
| Brazil   | Florianopolis           | 2008-2012                     | 5                        | 2008-2012                    | 0                       |
| Brazil   | Fortaleza               | 1978-2006                     | 25                       | 1978-2006                    | 0                       |
| Brazil   | Goiania                 | 1988-2009                     | 22                       | 1988-2009                    | 0                       |
| Brazil   | Jahu                    | 1996-2013                     | 18                       | 1996-2013                    | 0                       |
| Brazil   | Joao Pessoa             | 1999-2010                     | 12                       | 1999-2010                    | 0                       |
| Brazil   | Manaus                  | 1999-2006                     | 8                        | 1999-2006                    | 0                       |
| Brazil   | Mato Grosso Interior    | 2001-2005                     | 5                        | 2001-2005                    | 0                       |
| Brazil   | Natal                   | 1999-2005                     | 7                        | 1999-2005                    | 0                       |
| Brazil   | Palmas                  | 2000-2012                     | 13                       | 2000-2012                    | 0                       |
| Brazil   | Pocos de Caldas         | 2007-2011                     | 5                        | 2007-2011                    | 0                       |
| Brazil   | Porto Alegre            | 1979-2006                     | 22                       | 1979-2006                    | 0                       |
| Brazil   | Recife                  | 1968-2010                     | 17                       | 1968-2010                    | 0                       |

| Location | Registry                        | Years available from registry | Years used for incidence | Years available for MI ratio | Years used for MI ratio |
|----------|---------------------------------|-------------------------------|--------------------------|------------------------------|-------------------------|
| Brazil   | Roraima                         | 2003-2010                     | 8                        | 2003-2010                    | 0                       |
| Brazil   | Salvador                        | 1996-2005                     | 10                       | 1996-2005                    | 0                       |
| Brazil   | Santos                          | 2008-2009                     | 2                        | 2008-2009                    | 0                       |
| Brazil   | Sao Paulo                       | 1969-2011                     | 17                       | 1969-2011                    | 0                       |
| Brazil   | Teresina                        | 2000-2006                     | 7                        | 2000-2006                    | 0                       |
| Bulgaria | National Registry               | 1993-2010                     | 12                       | 1993-2010                    | 12                      |
| Canada   | Alberta                         | 1960-2007                     | 32                       | 1960-2007                    | 0                       |
| Canada   | British Columbia                | 1969-2007                     | 32                       | 1969-2007                    | 0                       |
| Canada   | Manitoba                        | 1958-2007                     | 32                       | 1958-2007                    | 0                       |
| Canada   | Maritime                        | 1969-1987                     | 9                        | 1969-1987                    | 0                       |
| Canada   | National Registry               | 1978-2007                     | 30                       | 1978-2007                    | 0                       |
| Canada   | New Brunswick                   | 1962-2007                     | 25                       | 1962-2007                    | 0                       |
| Canada   | Newfoundland                    | 1969-2002                     | 26                       | 1969-2002                    | 0                       |
| Canada   | Newfoundland and Labrador       | 1960-2007                     | 9                        | 1960-2007                    | 0                       |
| Canada   | Northwest Territories           | 1983-2007                     | 0                        | 1983-2007                    | 0                       |
| Canada   | Northwest Territories and Yukon | 1973-1987                     | 5                        | 1973-1987                    | 0                       |
| Canada   | Nova Scotia                     | 1978-2007                     | 20                       | 1978-2007                    | 0                       |
| Canada   | Ontario                         | 1969-2007                     | 23                       | 1969-2007                    | 0                       |
| Canada   | Prince Edward Island            | 1978-2007                     | 16                       | 1978-2007                    | 0                       |
| Canada   | Quebec                          | 1963-2007                     | 13                       | 1963-2007                    | 0                       |
| Canada   | Saskatchewan                    | 1960-2007                     | 34                       | 1960-2007                    | 0                       |
| Canada   | Yukon                           | 1983-2007                     | 0                        | 1983-2007                    | 0                       |
| Chile    | Antofagasta                     | 2003-2007                     | 0                        | 2003-2007                    | 0                       |
| Chile    | Bio Bio                         | 2003-2007                     | 5                        | 2003-2007                    | 0                       |
| Chile    | Los Rios                        | 2003-2007                     | 5                        | 2003-2007                    | 0                       |
| Chile    | National Registry               | 1959-1961                     | 0                        | 1959-1961                    | 0                       |
| Chile    | Valdivia                        | 1998-2007                     | 10                       | 1998-2007                    | 0                       |
| China    | Anshan                          | 1998-2011                     | 11                       | 1998-2011                    | 13                      |

| Location | Registry                    | Years available from registry | Years used for incidence | Years available for MI ratio | Years used for MI ratio |
|----------|-----------------------------|-------------------------------|--------------------------|------------------------------|-------------------------|
| China    | Baoding                     | 2009-2011                     | 2                        | 2009-2011                    | 2                       |
| China    | Beijing                     | 1990-2011                     | 22                       | 1990-2011                    | 21                      |
| China    | Beijing Rural Areas         | 2011                          | 0                        | 2011                         | 0                       |
| China    | Beiliu                      | 2011                          | 1                        | 2011                         | 1                       |
| China    | Bengbu                      | 2011                          | 1                        | 2011                         | 1                       |
| China    | Benxi                       | 2003-2011                     | 8                        | 2003-2011                    | 8                       |
| China    | Bijiang District, Tongren   | 2011                          | 1                        | 2011                         | 1                       |
| China    | Bincheng District, Binzhou  | 2011                          | 1                        | 2011                         | 1                       |
| China    | Binghai                     | 2011                          | 1                        | 2011                         | 1                       |
| China    | Boli                        | 2011                          | 1                        | 2011                         | 1                       |
| China    | Cangwu                      | 2011                          | 1                        | 2011                         | 1                       |
| China    | Cangzhou                    | 2011                          | 1                        | 2011                         | 1                       |
| China    | Changfeng                   | 2011                          | 1                        | 2011                         | 1                       |
| China    | Changle                     | 1990-2011                     | 21                       | 1990-2011                    | 21                      |
| China    | Changning                   | 2011                          | 1                        | 2011                         | 1                       |
| China    | Changzhou                   | 2011                          | 1                        | 2011                         | 1                       |
| China    | Chifeng                     | 2009-2011                     | 2                        | 2009-2011                    | 2                       |
| China    | Chuzhou District, Huai'an   | 2004-2007                     | 3                        | 2004-2007                    | 0                       |
| China    | Ci County                   | 1990-2009                     | 23                       | 1990-2009                    | 12                      |
| China    | Cili                        | 2011                          | 1                        | 2011                         | 1                       |
| China    | Cixi                        | 2011                          | 1                        | 2011                         | 1                       |
| China    | Cixian                      | 2011                          | 1                        | 2011                         | 1                       |
| China    | Daan                        | 2011                          | 1                        | 2011                         | 1                       |
| China    | Dafeng                      | 2003-2011                     | 6                        | 2003-2011                    | 8                       |
| China    | Dalian City                 | 1998-2011                     | 12                       | 1998-2011                    | 13                      |
| China    | Dancheng                    | 2011                          | 1                        | 2011                         | 1                       |
| China    | Dandong                     | 2008-2011                     | 3                        | 2008-2011                    | 3                       |
| China    | Daoli District, Harbin City | 2005-2011                     | 5                        | 2005-2011                    | 6                       |

| Location | Registry                  | Years available from registry | Years used for incidence | Years available for MI ratio | Years used for MI ratio |
|----------|---------------------------|-------------------------------|--------------------------|------------------------------|-------------------------|
| China    | Dawukou                   | 2011                          | 1                        | 2011                         | 1                       |
| China    | Dazhu                     | 2011                          | 1                        | 2011                         | 1                       |
| China    | Decheng District, Dezhou  | 2011                          | 1                        | 2011                         | 1                       |
| China    | Dehui                     | 2009-2011                     | 2                        | 2009-2011                    | 2                       |
| China    | Dingan                    | 2011                          | 1                        | 2011                         | 1                       |
| China    | Donggang                  | 2009-2011                     | 2                        | 2009-2011                    | 2                       |
| China    | Donghai County            | 2004-2011                     | 3                        | 2004-2011                    | 2                       |
| China    | Dunhuang                  | 2011                          | 1                        | 2011                         | 1                       |
| China    | Faku                      | 2011                          | 1                        | 2011                         | 1                       |
| China    | Feicheng                  | 1998-2011                     | 13                       | 1998-2011                    | 13                      |
| China    | Feidong                   | 2011                          | 1                        | 2011                         | 1                       |
| China    | Feixi County              | 2009-2011                     | 2                        | 2009-2011                    | 2                       |
| China    | Fusui County              | 1990-2011                     | 14                       | 1990-2011                    | 8                       |
| China    | Fuyuan                    | 2011                          | 1                        | 2011                         | 1                       |
| China    | Ganyu                     | 2004-2011                     | 2                        | 2004-2011                    | 1                       |
| China    | Ganzhou District, Zhangye | 2011                          | 1                        | 2011                         | 1                       |
| China    | Gaomi                     | 2011                          | 1                        | 2011                         | 1                       |
| China    | Gaotang                   | 2011                          | 1                        | 2011                         | 1                       |
| China    | Gejiu                     | 2004-2011                     | 3                        | 2004-2011                    | 2                       |
| China    | Gongan                    | 2011                          | 1                        | 2011                         | 1                       |
| China    | Guangrao                  | 2011                          | 1                        | 2011                         | 1                       |
| China    | Guangzhou City            | 2000-2011                     | 9                        | 2000-2011                    | 11                      |
| China    | Guannan                   | 2011                          | 1                        | 2011                         | 1                       |
| China    | Guanyun County            | 2004-2011                     | 3                        | 2004-2011                    | 3                       |
| China    | Guilin                    | 2011                          | 1                        | 2011                         | 1                       |
| China    | Guyuan                    | 2011                          | 1                        | 2011                         | 1                       |
| China    | Hai'an County             | 2009-2011                     | 2                        | 2009-2011                    | 2                       |
| China    | Haimen                    | 2003-2011                     | 7                        | 2003-2011                    | 8                       |



| Location | Registry                                         | Years available from registry | Years used for incidence | Years available for MI ratio | Years used for MI ratio |
|----------|--------------------------------------------------|-------------------------------|--------------------------|------------------------------|-------------------------|
| China    | Hainan                                           | 2011                          | 1                        | 2011                         | 1                       |
| China    | Haining                                          | 1998-2011                     | 11                       | 1998-2011                    | 13                      |
| China    | Hangzhou City                                    | 2000-2011                     | 9                        | 2000-2011                    | 11                      |
| China    | Hanjiang District, Putian                        | 2011                          | 1                        | 2011                         | 1                       |
| China    | Hefei                                            | 2011                          | 1                        | 2011                         | 1                       |
| China    | Hengdong County                                  | 2009-2011                     | 2                        | 2009-2011                    | 2                       |
| China    | Hepu                                             | 2011                          | 1                        | 2011                         | 1                       |
| China    | Hetian                                           | 2011                          | 1                        | 2011                         | 1                       |
| China    | Hong Kong Special Administrative Region of China | 1974-2013                     | 43                       | 1974-2013                    | 8                       |
| China    | Hongta District, Yuxi                            | 2011                          | 1                        | 2011                         | 1                       |
| China    | Hongtong                                         | 2011                          | 1                        | 2011                         | 1                       |
| China    | Hongze                                           | 2011                          | 1                        | 2011                         | 1                       |
| China    | Huai'an District, Huai'an                        | 1998-2009                     | 12                       | 1998-2009                    | 12                      |
| China    | Huaiyin District, Huai'an                        | 2009-2011                     | 2                        | 2009-2011                    | 2                       |
| China    | Huangdao District, Qingdao                       | 2011                          | 1                        | 2011                         | 1                       |
| China    | Huian                                            | 2011                          | 1                        | 2011                         | 1                       |
| China    | Huichuan District, Zunyi                         | 2011                          | 1                        | 2011                         | 1                       |
| China    | Huinong                                          | 2011                          | 1                        | 2011                         | 1                       |
| China    | Huixian                                          | 2011                          | 1                        | 2011                         | 1                       |
| China    | Huzhu                                            | 2011                          | 1                        | 2011                         | 1                       |
| China    | Jiangmen                                         | 2011                          | 1                        | 2011                         | 1                       |
| China    | Jianhu County                                    | 2003-2011                     | 6                        | 2003-2011                    | 8                       |
| China    | Jianou                                           | 2011                          | 1                        | 2011                         | 1                       |
| China    | Jianping                                         | 2011                          | 1                        | 2011                         | 1                       |
| China    | Jiashan County                                   | 1990-2011                     | 22                       | 1990-2011                    | 21                      |
| China    | Jiaxing                                          | 2000-2011                     | 10                       | 2000-2011                    | 11                      |
| China    | Jilin                                            | 2011                          | 1                        | 2011                         | 1                       |

| Location | Registry                      | Years available from registry | Years used for incidence | Years available for MI ratio | Years used for MI ratio |
|----------|-------------------------------|-------------------------------|--------------------------|------------------------------|-------------------------|
| China    | Jinan                         | 2011                          | 1                        | 2011                         | 1                       |
| China    | Jingan                        | 2011                          | 1                        | 2011                         | 1                       |
| China    | Jingtai County                | 2009-2011                     | 2                        | 2009-2011                    | 2                       |
| China    | Jingxian                      | 2011                          | 1                        | 2011                         | 1                       |
| China    | Jingyang                      | 2011                          | 1                        | 2011                         | 1                       |
| China    | Jinhu County                  | 2007-2011                     | 3                        | 2007-2011                    | 4                       |
| China    | Jintan District               | 2003-2011                     | 6                        | 2003-2011                    | 7                       |
| China    | Jinzhai                       | 2011                          | 1                        | 2011                         | 1                       |
| China    | Jiulongpo District, Chongqing | 2004-2011                     | 3                        | 2004-2011                    | 4                       |
| China    | Jiyuan                        | 2011                          | 1                        | 2011                         | 1                       |
| China    | Junan                         | 2011                          | 1                        | 2011                         | 1                       |
| China    | Kaihua                        | 2011                          | 1                        | 2011                         | 1                       |
| China    | Kailu                         | 2011                          | 1                        | 2011                         | 1                       |
| China    | Kaiyang                       | 2011                          | 1                        | 2011                         | 1                       |
| China    | Kangping                      | 2011                          | 1                        | 2011                         | 1                       |
| China    | Kunes County                  | 2009                          | 1                        | 2009                         | 1                       |
| China    | Lanping                       | 2011                          | 1                        | 2011                         | 1                       |
| China    | Lanzhou                       | 2011                          | 1                        | 2011                         | 1                       |
| China    | Leishan                       | 2011                          | 1                        | 2011                         | 1                       |
| China    | Leshan                        | 2011                          | 1                        | 2011                         | 1                       |
| China    | Lhasa                         | 2011                          | 1                        | 2011                         | 1                       |
| China    | Liangzhou District            | 2008-2011                     | 3                        | 2008-2011                    | 3                       |
| China    | Lianhu District, Xi'an        | 2011                          | 1                        | 2011                         | 1                       |
| China    | Lianshui                      | 2011                          | 1                        | 2011                         | 1                       |
| China    | Lianyungang                   | 2004-2011                     | 4                        | 2004-2011                    | 4                       |
| China    | Lingbi                        | 2011                          | 1                        | 2011                         | 1                       |
| China    | Linhe District, Bayannaer     | 2011                          | 1                        | 2011                         | 1                       |
| China    | Linqu County                  | 1998-2011                     | 11                       | 1998-2011                    | 13                      |

| Location | Registry                                     | Years available from registry | Years used for incidence | Years available for MI ratio | Years used for MI ratio |
|----------|----------------------------------------------|-------------------------------|--------------------------|------------------------------|-------------------------|
| China    | Lintan                                       | 2011                          | 1                        | 2011                         | 1                       |
| China    | Linxian                                      | 2011                          | 1                        | 2011                         | 1                       |
| China    | Linzhou                                      | 1990-2011                     | 19                       | 1990-2011                    | 21                      |
| China    | Liuzhou                                      | 2009-2011                     | 2                        | 2009-2011                    | 2                       |
| China    | Liyang                                       | 2011                          | 1                        | 2011                         | 1                       |
| China    | Longnan                                      | 2011                          | 1                        | 2011                         | 1                       |
| China    | Longquanyi District, Chengdu                 | 2011                          | 1                        | 2011                         | 1                       |
| China    | Lujiang                                      | 2011                          | 1                        | 2011                         | 1                       |
| China    | Luoshan                                      | 2011                          | 1                        | 2011                         | 1                       |
| China    | Luoyang                                      | 2011                          | 1                        | 2011                         | 1                       |
| China    | Lushan                                       | 2011                          | 1                        | 2011                         | 1                       |
| China    | Ma'anshan                                    | 2003-2011                     | 6                        | 2003-2011                    | 8                       |
| China    | Macao Special Administrative Region of China | 2003-2007                     | 5                        | 2003-2007                    | 0                       |
| China    | Macheng                                      | 2011                          | 1                        | 2011                         | 1                       |
| China    | Maiji District, Tianshui                     | 2011                          | 1                        | 2011                         | 1                       |
| China    | Mayang                                       | 2011                          | 1                        | 2011                         | 1                       |
| China    | Meixian                                      | 2011                          | 1                        | 2011                         | 1                       |
| China    | Minhe                                        | 2011                          | 1                        | 2011                         | 1                       |
| China    | Naidong                                      | 2011                          | 1                        | 2011                         | 1                       |
| China    | Nangang District, Harbin City                | 1992-2011                     | 20                       | 1992-2011                    | 14                      |
| China    | Nantong                                      | 2011                          | 1                        | 2011                         | 1                       |
| China    | Neixiang                                     | 2011                          | 1                        | 2011                         | 1                       |
| China    | Ningyang                                     | 2011                          | 1                        | 2011                         | 1                       |
| China    | Nongqishi                                    | 2011                          | 1                        | 2011                         | 1                       |
| China    | Pengzhou                                     | 2011                          | 1                        | 2011                         | 1                       |
| China    | Pingluo                                      | 2011                          | 1                        | 2011                         | 1                       |
| China    | Qianxi County                                | 2009-2011                     | 2                        | 2009-2011                    | 2                       |
| China    | Qidong County                                | 1983-2011                     | 35                       | 1983-2011                    | 21                      |

| Location | Registry                      | Years available from registry | Years used for incidence | Years available for MI ratio | Years used for MI ratio |
|----------|-------------------------------|-------------------------------|--------------------------|------------------------------|-------------------------|
| China    | Qingdao                       | 2011                          | 1                        | 2011                         | 1                       |
| China    | Qinghe                        | 2011                          | 1                        | 2011                         | 1                       |
| China    | Qingpu                        | 2011                          | 1                        | 2011                         | 1                       |
| China    | Qingyang District, Chengdu    | 2009-2011                     | 2                        | 2009-2011                    | 2                       |
| China    | Qinhuangdao                   | 2011                          | 1                        | 2011                         | 1                       |
| China    | Qionghai                      | 2011                          | 1                        | 2011                         | 1                       |
| China    | Renhe District, Panzhihua     | 2011                          | 1                        | 2011                         | 1                       |
| China    | Rushan                        | 2011                          | 1                        | 2011                         | 1                       |
| China    | Sanmenxia                     | 2011                          | 1                        | 2011                         | 1                       |
| China    | Sanya                         | 2011                          | 1                        | 2011                         | 1                       |
| China    | Shangdong                     | 1993-1997                     | 0                        | NA                           | NA                      |
| China    | Shanggao                      | 2011                          | 1                        | 2011                         | 1                       |
| China    | Shanghai                      | 1975-2011                     | 31                       | 1975-2011                    | 21                      |
| China    | Shangyu                       | 2009-2011                     | 2                        | 2009-2011                    | 2                       |
| China    | Shangzhi                      | 2009-2011                     | 2                        | 2009-2011                    | 2                       |
| China    | Shangzhou District, Shangluo  | 2011                          | 1                        | 2011                         | 1                       |
| China    | Shapingba District, Chongqing | 2011                          | 1                        | 2011                         | 1                       |
| China    | Shenqiu                       | 2011                          | 1                        | 2011                         | 1                       |
| China    | Shenyang City                 | 2003-2011                     | 7                        | 2003-2011                    | 8                       |
| China    | Shenzen City                  | 2004-2011                     | 2                        | 2004-2011                    | 1                       |
| China    | Shexian County                | 2003-2011                     | 8                        | 2003-2011                    | 8                       |
| China    | Sheyang County                | 2008-2011                     | 3                        | 2008-2011                    | 3                       |
| China    | Shifeng District, Zhuzhou     | 2011                          | 1                        | 2011                         | 1                       |
| China    | Shihezi                       | 2011                          | 1                        | 2011                         | 1                       |
| China    | Shouxian                      | 2011                          | 1                        | 2011                         | 1                       |
| China    | Shouyang                      | 2011                          | 1                        | 2011                         | 1                       |
| China    | Sihui                         | 1998-2011                     | 11                       | 1998-2011                    | 13                      |
| China    | Suzhou                        | 2006-2011                     | 4                        | 2006-2011                    | 5                       |

| Location | Registry                      | Years available from registry | Years used for incidence | Years available for MI ratio | Years used for MI ratio |
|----------|-------------------------------|-------------------------------|--------------------------|------------------------------|-------------------------|
| China    | Taixing                       | 2004-2011                     | 4                        | 2004-2011                    | 6                       |
| China    | Tengchong                     | 2011                          | 1                        | 2011                         | 1                       |
| China    | Tengzhou                      | 2011                          | 1                        | 2011                         | 1                       |
| China    | Tianchang                     | 2011                          | 1                        | 2011                         | 1                       |
| China    | Tianjin                       | 1981-2011                     | 22                       | 1981-2011                    | 16                      |
| China    | Tianjin Rural Areas           | 2011                          | 0                        | 2011                         | 0                       |
| China    | Tianshan District, Urumqi     | 2011                          | 1                        | 2011                         | 1                       |
| China    | Tong'an District, Xiamen      | 2011                          | 1                        | 2011                         | 1                       |
| China    | Tongguan                      | 2011                          | 1                        | 2011                         | 1                       |
| China    | Tonghua                       | 2011                          | 1                        | 2011                         | 1                       |
| China    | Tongling                      | 2008-2011                     | 3                        | 2008-2011                    | 3                       |
| China    | Wanzhouqu District, Chongqing | 2011                          | 1                        | 2011                         | 1                       |
| China    | Wenshang County               | 2009-2011                     | 2                        | 2009-2011                    | 2                       |
| China    | Wuan                          | 2011                          | 1                        | 2011                         | 1                       |
| China    | Wufeng                        | 2011                          | 1                        | 2011                         | 1                       |
| China    | Wuhan City                    | 1990-2011                     | 22                       | 1990-2011                    | 18                      |
| China    | Wuhu                          | 2011                          | 1                        | 2011                         | 1                       |
| China    | Wuning                        | 2011                          | 1                        | 2011                         | 1                       |
| China    | Wuwei                         | 2004                          | 1                        | 2004                         | 0                       |
| China    | Wuxi                          | 2006-2011                     | 2                        | 2006-2011                    | 2                       |
| China    | Xiamen City                   | 2009-2011                     | 2                        | 2009-2011                    | 2                       |
| China    | Xiang'an District, Xiamen     | 2011                          | 1                        | 2011                         | 1                       |
| China    | Xiangfang District, Harbin    | 2011                          | 1                        | 2011                         | 1                       |
| China    | Xianju County                 | 2009-2011                     | 2                        | 2009-2011                    | 2                       |
| China    | Xilinhaote                    | 2011                          | 1                        | 2011                         | 1                       |
| China    | Xinghualing District, Taiyuan | 2011                          | 1                        | 2011                         | 1                       |
| China    | Xining                        | 2009-2011                     | 2                        | 2009-2011                    | 2                       |
| China    | Xinyuan                       | 2011                          | 1                        | 2011                         | 1                       |

| Location | Registry                   | Years available from registry | Years used for incidence | Years available for MI ratio | Years used for MI ratio |
|----------|----------------------------|-------------------------------|--------------------------|------------------------------|-------------------------|
| China    | Xinzhou District, Shangrao | 2011                          | 1                        | 2011                         | 1                       |
| China    | Xiping County              | 2009-2011                     | 2                        | 2009-2011                    | 2                       |
| China    | Xuanwei                    | 2011                          | 1                        | 2011                         | 1                       |
| China    | Xuyi County                | 2009-2011                     | 2                        | 2009-2011                    | 2                       |
| China    | Xuzhou                     | 2011                          | 1                        | 2011                         | 1                       |
| China    | Yakeshi                    | 2011                          | 1                        | 2011                         | 1                       |
| China    | Yancheng                   | 2011                          | 1                        | 2011                         | 1                       |
| China    | Yancheng District, Luohe   | 2011                          | 1                        | 2011                         | 1                       |
| China    | Yangcheng County           | 2003-2011                     | 6                        | 2003-2011                    | 8                       |
| China    | Yangquan                   | 2009-2011                     | 2                        | 2009-2011                    | 2                       |
| China    | Yangshan                   | 2011                          | 1                        | 2011                         | 1                       |
| China    | Yangzhong                  | 1998-2011                     | 12                       | 1998-2011                    | 13                      |
| China    | Yanji                      | 2009-2011                     | 2                        | 2009-2011                    | 2                       |
| China    | Yanshi                     | 2009-2011                     | 2                        | 2009-2011                    | 2                       |
| China    | Yantai                     | 2011                          | 1                        | 2011                         | 1                       |
| China    | Yanting County             | 1998-2011                     | 10                       | 1998-2011                    | 13                      |
| China    | Yinchuan                   | 2011                          | 1                        | 2011                         | 1                       |
| China    | Yingdong District, Fuyang  | 2011                          | 1                        | 2011                         | 1                       |
| China    | Yingshan                   | 2011                          | 1                        | 2011                         | 1                       |
| China    | Yiyuan                     | 2011                          | 1                        | 2011                         | 1                       |
| China    | Yongding                   | 2011                          | 1                        | 2011                         | 1                       |
| China    | Yongqiao District, Suzhou  | 2011                          | 1                        | 2011                         | 1                       |
| China    | Yuanhui District, Luohe    | 2011                          | 1                        | 2011                         | 1                       |
| China    | Yuanqu                     | 2011                          | 1                        | 2011                         | 1                       |
| China    | Yucheng                    | 2011                          | 1                        | 2011                         | 1                       |
| China    | Yuci District, Jinzhong    | 2011                          | 1                        | 2011                         | 1                       |
| China    | Yueyanglou                 | 2011                          | 1                        | 2011                         | 1                       |
| China    | Yunmeng County             | 2009-2011                     | 2                        | 2009-2011                    | 2                       |

| Location      | Registry                    | Years available from registry | Years used for incidence | Years available for MI ratio | Years used for MI ratio |
|---------------|-----------------------------|-------------------------------|--------------------------|------------------------------|-------------------------|
| China         | Yuzhong District, Chongqing | 2011                          | 1                        | 2011                         | 1                       |
| China         | Yuzhou                      | 2011                          | 1                        | 2011                         | 1                       |
| China         | Zanhuang                    | 2011                          | 1                        | 2011                         | 1                       |
| China         | Zhanggong District          | 2009                          | 1                        | 2009                         | 1                       |
| China         | Zhanggong District, Ganzhou | 2011                          | 1                        | 2011                         | 1                       |
| China         | Zhangqiu                    | 2011                          | 1                        | 2011                         | 1                       |
| China         | Zhaoling District, Luohe    | 2011                          | 1                        | 2011                         | 1                       |
| China         | Zhaoyuan                    | 2011                          | 1                        | 2011                         | 1                       |
| China         | Zhongshan                   | 1998-2011                     | 12                       | 1998-2011                    | 13                      |
| China         | Zhongshan County            | 2004-2007                     | 3                        | 2004-2007                    | 0                       |
| China         | Zhongwei                    | 2011                          | 1                        | 2011                         | 1                       |
| China         | Zhongxiang                  | 2011                          | 1                        | 2011                         | 1                       |
| China         | Zhuanghe                    | 2009-2011                     | 2                        | 2009-2011                    | 2                       |
| China         | Zhuhai                      | 2011                          | 1                        | 2011                         | 1                       |
| China         | Ziliujing District          | 2009                          | 1                        | 2009                         | 1                       |
| China         | Ziliujing District, Zigong  | 2011                          | 1                        | 2011                         | 1                       |
| China         | Zixing                      | 2011                          | 1                        | 2011                         | 1                       |
| China         | Zoucheng                    | 2011                          | 1                        | 2011                         | 1                       |
| Colombia      | Bucaramanga                 | 2003-2007                     | 5                        | 2003-2007                    | 0                       |
| Colombia      | Cali                        | 1962-2007                     | 40                       | 1962-2007                    | 0                       |
| Colombia      | Manizales                   | 2003-2007                     | 5                        | 2003-2007                    | 0                       |
| Colombia      | National Registry           | 2003-2010                     | 0                        | 2003-2010                    | 0                       |
| Colombia      | Pasto                       | 2003-2007                     | 5                        | 2003-2007                    | 0                       |
| Costa Rica    | National Registry           | 1980-2011                     | 33                       | 1980-2013                    | 0                       |
| Cote d'Ivoire | National Registry           | 1995-1997                     | 3                        | 1995-1997                    | 0                       |
| Croatia       | National Registry           | 1988-2010                     | 23                       | 1988-2010                    | 8                       |
| Cuba          | National Registry           | 1968-1987                     | 11                       | 1968-1986                    | 0                       |
| Cuba          | Villa Clara                 | 1995-2007                     | 7                        | 1995-2007                    | 0                       |

| Location       | Registry            | Years available from registry | Years used for incidence | Years available for MI ratio | Years used for MI ratio |
|----------------|---------------------|-------------------------------|--------------------------|------------------------------|-------------------------|
| Cyprus         | National Registry   | 1998-2007                     | 9                        | 1998-2007                    | 4                       |
| Czech Republic | National Registry   | 1983-2010                     | 27                       | 1983-2010                    | 5                       |
| Denmark        | National Registry   | 1953-2014                     | 50                       | 1953-2014                    | 35                      |
| Ecuador        | Cuenca              | 2003-2007                     | 5                        | 2003-2007                    | 0                       |
| Ecuador        | Quito               | 1985-2007                     | 25                       | 1985-2007                    | 0                       |
| Egypt          | Aswan               | 2008                          | 1                        | 2008                         | 0                       |
| Egypt          | Damietta            | 2009                          | 1                        | 2009                         | 0                       |
| Egypt          | Gharbiah            | 1999-2007                     | 9                        | 1999-2007                    | 0                       |
| Egypt          | Minia               | 2009                          | 1                        | 2009                         | 0                       |
| Estonia        | National Registry   | 1968-2011                     | 44                       | 1968-2009                    | 5                       |
| Fiji           | National Registry   | 1998-2010                     | 13                       | 1998-2010                    | 11                      |
| Finland        | National Registry   | 1953-2014                     | 50                       | 1953-2014                    | 35                      |
| France         | Bas Rhin            | 1975-2007                     | 33                       | 1975-2007                    | 0                       |
| France         | Calvados            | 1978-2007                     | 30                       | 1978-2007                    | 0                       |
| France         | Calvados Digestive  | 1978-2009                     | 6                        | 1978-2009                    | 0                       |
| France         | Cote d'Or           | 1980-2009                     | 30                       | 1980-2009                    | 0                       |
| France         | Doubs               | 1977-2009                     | 36                       | 1977-2009                    | 0                       |
| France         | Finistere Digestive | 1984-2009                     | 26                       | 1984-2009                    | 0                       |
| France         | Haut Rhin           | 1988-2009                     | 21                       | 1988-2009                    | 0                       |
| France         | Herault             | 1987-2009                     | 26                       | 1987-2009                    | 0                       |
| France         | Isere               | 1979-2009                     | 30                       | 1979-2009                    | 0                       |
| France         | Loire Atlantique    | 1991-2009                     | 18                       | 1991-2009                    | 0                       |
| France         | Manche              | 1994-2009                     | 19                       | 1994-2009                    | 0                       |
| France         | Nord                | 2005-2009                     | 3                        | 2005-2009                    | 0                       |
| France         | Normandy            | 2002-2009                     | 8                        | 2002-2009                    | 0                       |
| France         | Somme               | 1982-2009                     | 27                       | 1982-2009                    | 0                       |
| France         | Tarn                | 1982-2009                     | 27                       | 1982-2009                    | 0                       |
| France         | Vendee              | 1998-2007                     | 10                       | 1998-2007                    | 0                       |



| Location         | Registry                      | Years available from registry | Years used for incidence | Years available for MI ratio | Years used for MI ratio |
|------------------|-------------------------------|-------------------------------|--------------------------|------------------------------|-------------------------|
| French Polynesia | French Polynesia              | 1988-2002                     | 0                        | NA                           | NA                      |
| Germany          | Bavaria                       | 2002-2007                     | 0                        | 2002-2007                    | 0                       |
| Germany          | Berlin                        | 1998-2007                     | 2                        | 1998-2007                    | 0                       |
| Germany          | Brandenburg                   | 1998-2007                     | 2                        | 1998-2007                    | 0                       |
| Germany          | Bremen                        | 2000-2008                     | 0                        | 2000-2008                    | 0                       |
| Germany          | Eastern States (former GDR)   | 1964-1989                     | 22                       | 1964-1989                    | 0                       |
| Germany          | Free State of Saxony          | 1998-2007                     | 2                        | 1998-2007                    | 0                       |
| Germany          | Hamburg                       | 1969-2009                     | 16                       | 1969-2010                    | 2                       |
| Germany          | Lower Saxony                  | 2003-2007                     | 0                        | 2003-2007                    | 0                       |
| Germany          | Mecklenburg                   | 1998-2007                     | 2                        | 1998-2007                    | 0                       |
| Germany          | Mecklenburg-West Pomerania    | 1998-2007                     | 0                        | 1998-2007                    | 0                       |
| Germany          | Munich                        | 1998-2007                     | 0                        | 1998-2007                    | 0                       |
| Germany          | National Registry             | 2000-2010                     | 11                       | 2000-2010                    | 11                      |
| Germany          | North Rhine Westphalia        | 1998-2007                     | 2                        | 1994-2007                    | 2                       |
| Germany          | Rhineland Palatinate          | 2000-2007                     | 0                        | 2000-2007                    | 0                       |
| Germany          | Saarland                      | 1968-2007                     | 30                       | 1968-2007                    | 30                      |
| Germany          | Saxony-Anhalt                 | 1998-2007                     | 2                        | 1998-2007                    | 0                       |
| Germany          | Schleswig Holstein            | 1998-2007                     | 2                        | 1998-2007                    | 2                       |
| Germany          | Thuringen                     | 1998-2007                     | 2                        | 1998-2007                    | 0                       |
| Germany          | Westphalia                    | 1998-2007                     | 0                        | 1998-2007                    | 0                       |
| Greece           | National Registry             | 1990-1991                     | 0                        | 1990-1991                    | 0                       |
| Greenland        | Greenland                     | 1980-2014                     | 35                       | 1980-2014                    | 32                      |
| Grenada          | St. George's Central Hospital | 1996-2000                     | 5                        | 1996-2000                    | 0                       |
| Guinea           | Conakry                       | 1992-1995                     | 4                        | 1992-1995                    | 0                       |
| Hungary          | County Szabolcs-Szatmar       | 1962-1987                     | 18                       | 1962-1987                    | 0                       |
| Hungary          | County Vas                    | 1962-1987                     | 20                       | 1962-1987                    | 0                       |
| Hungary          | Miskolc                       | 1962-1966                     | 0                        | 1962-1966                    | 0                       |
| Hungary          | National Registry             | 2001-2011                     | 11                       | 2001-2011                    | 0                       |

| Location | Registry                   | Years available from registry | Years used for incidence | Years available for MI ratio | Years used for MI ratio |
|----------|----------------------------|-------------------------------|--------------------------|------------------------------|-------------------------|
| Iceland  | National Registry          | 1955-2014                     | 50                       | 1955-2014                    | 35                      |
| India    | Ahmedabad                  | 1983-2005                     | 12                       | NA                           | NA                      |
| India    | Ahmedabad Rural            | 2006-2010                     | 5                        | NA                           | NA                      |
| India    | Ahmedabad Urban            | 2006-2013                     | 7                        | NA                           | NA                      |
| India    | Aizawl                     | 2005-2014                     | 5                        | NA                           | NA                      |
| India    | Aurangabad                 | 2005-2014                     | 9                        | NA                           | NA                      |
| India    | Bangalore                  | 1982-2012                     | 24                       | NA                           | NA                      |
| India    | Barshi Expanded            | 2009-2012                     | 2                        | NA                           | NA                      |
| India    | Barshi Rural               | 1988-2014                     | 20                       | NA                           | NA                      |
| India    | Bhopal                     | 2004-2013                     | 11                       | NA                           | NA                      |
| India    | Cachar                     | 2007-2014                     | 7                        | NA                           | NA                      |
| India    | Chandigarh Union Territory | 2013                          | 1                        | NA                           | NA                      |
| India    | Chennai                    | 1982-2013                     | 34                       | NA                           | NA                      |
| India    | Delhi                      | 1993-2012                     | 21                       | NA                           | NA                      |
| India    | Dibrugarh                  | 2005-2014                     | 11                       | NA                           | NA                      |
| India    | Dindigul Ambilikkai        | 2003-2013                     | 7                        | NA                           | NA                      |
| India    | Imphal                     | 2005-2014                     | 5                        | NA                           | NA                      |
| India    | Kamrup Urban               | 2005-2014                     | 11                       | NA                           | NA                      |
| India    | Karunagappally             | 1991-2007                     | 17                       | NA                           | NA                      |
| India    | Kolkata                    | 2005-2012                     | 6                        | NA                           | NA                      |
| India    | Kollam                     | 2006-2014                     | 8                        | NA                           | NA                      |
| India    | Manipur                    | 2006-2010                     | 5                        | NA                           | NA                      |
| India    | Manipur Excl Imphal West   | 2009-2014                     | 5                        | NA                           | NA                      |
| India    | Mansa District             | 2013                          | 1                        | NA                           | NA                      |
| India    | Meghalaya                  | 2010-2014                     | 5                        | NA                           | NA                      |
| India    | Mizoram                    | 2003-2010                     | 10                       | NA                           | NA                      |
| India    | Mizoram Excl Aizawl        | 2005-2014                     | 5                        | NA                           | NA                      |
| India    | Mumbai                     | 1964-2012                     | 50                       | NA                           | NA                      |

| Location | Registry                   | Years available from registry | Years used for incidence | Years available for MI ratio | Years used for MI ratio |
|----------|----------------------------|-------------------------------|--------------------------|------------------------------|-------------------------|
| India    | Nagaland                   | 2010-2014                     | 4                        | NA                           | NA                      |
| India    | Nagpur                     | 1980-2013                     | 20                       | NA                           | NA                      |
| India    | Naharlagun Excl Papum Pare | 2012-2014                     | 3                        | NA                           | NA                      |
| India    | Papum Pare                 | 2012-2014                     | 3                        | NA                           | NA                      |
| India    | Pasighat                   | 2012-2014                     | 3                        | NA                           | NA                      |
| India    | Patiala District           | 2012-2014                     | 3                        | NA                           | NA                      |
| India    | Pune                       | 1973-2013                     | 32                       | NA                           | NA                      |
| India    | S.A.S Nagar District       | 2013                          | 1                        | NA                           | NA                      |
| India    | Sangrur District           | 2013                          | 1                        | NA                           | NA                      |
| India    | Sikkim                     | 2003-2014                     | 14                       | NA                           | NA                      |
| India    | Silchar                    | 2005-2006                     | 2                        | NA                           | NA                      |
| India    | Tamil Nadu                 | 2012-2013                     | 2                        | NA                           | NA                      |
| India    | Tripura                    | 2010-2014                     | 4                        | NA                           | NA                      |
| India    | Trivandrum                 | 1991-2014                     | 21                       | NA                           | NA                      |
| India    | Wardha                     | 2010-2014                     | 5                        | NA                           | NA                      |
| Iran     | Ardabil                    | 1985-2008                     | 8                        | 1985-2008                    | 0                       |
| Iran     | Golestan                   | 1996-2007                     | 8                        | 1996-2007                    | 0                       |
| Iran     | National Registry          | 2003-2007                     | 8                        | 2003-2007                    | 0                       |
| Iraq     | National Registry          | 2007-2011                     | 3                        | 2007-2011                    | 0                       |
| Ireland  | National Registry          | 1994-2010                     | 16                       | 1994-2010                    | 0                       |
| Ireland  | Southern Ireland           | 1980-1992                     | 12                       | 1980-1992                    | 0                       |
| Israel   | National Registry          | 1960-2010                     | 13                       | 1960-2010                    | 0                       |
| Italy    | Alto Adige                 | 2003-2006                     | 4                        | 2003-2006                    | 0                       |
| Italy    | Biella                     | 1995-2007                     | 13                       | 1995-2007                    | 0                       |
| Italy    | Brescia                    | 1999-2007                     | 7                        | 1999-2006                    | 0                       |
| Italy    | Catania and Messina        | 2003-2005                     | 3                        | 2003-2005                    | 0                       |
| Italy    | Catanzaro                  | 2003-2007                     | 5                        | 2003-2007                    | 0                       |
| Italy    | Como                       | 2003-2007                     | 5                        | 2003-2007                    | 0                       |

| Location | Registry              | Years available from registry | Years used for incidence | Years available for MI ratio | Years used for MI ratio |
|----------|-----------------------|-------------------------------|--------------------------|------------------------------|-------------------------|
| Italy    | Ferrara               | 1991-2007                     | 17                       | 1991-2007                    | 0                       |
| Italy    | Florence              | 1985-2002                     | 18                       | 1985-2002                    | 0                       |
| Italy    | Florence and Prato    | 1985-2007                     | 21                       | 1985-2005                    | 0                       |
| Italy    | Friuli Venezia Giulia | 2003-2007                     | 5                        | 2003-2007                    | 0                       |
| Italy    | Genoa                 | 1986-2007                     | 18                       | 1986-2006                    | 0                       |
| Italy    | Latina                | 1983-2007                     | 12                       | 1983-2007                    | 0                       |
| Italy    | Lecco                 | 2003-2007                     | 5                        | 2003-2007                    | 0                       |
| Italy    | Macerata              | 1991-2000                     | 10                       | 1991-2000                    | 0                       |
| Italy    | Mantua                | 2003-2007                     | 3                        | 2003-2005                    | 0                       |
| Italy    | Milan                 | 1999-2007                     | 8                        | 1999-2006                    | 0                       |
| Italy    | Modena                | 1988-2007                     | 23                       | 1988-2007                    | 0                       |
| Italy    | Naples                | 1998-2007                     | 10                       | 1998-2007                    | 0                       |
| Italy    | National Registry     | 2006-2009                     | 4                        | 2006-2009                    | 4                       |
| Italy    | North East Italy      | 1995-2002                     | 8                        | 1995-2002                    | 0                       |
| Italy    | Nuoro                 | 2003-2007                     | 5                        | 2003-2007                    | 0                       |
| Italy    | Palermo               | 2003-2007                     | 4                        | 2003-2006                    | 0                       |
| Italy    | Parma                 | 1978-2007                     | 30                       | 1978-2007                    | 0                       |
| Italy    | Ragusa                | 1978-2007                     | 31                       | 1981-2007                    | 0                       |
| Italy    | Reggio Emilia         | 1998-2007                     | 10                       | 1998-2007                    | 0                       |
| Italy    | Romanga               | 1985-2007                     | 22                       | 1986-2007                    | 0                       |
| Italy    | Salerno               | 1998-2007                     | 9                        | 1998-2007                    | 0                       |
| Italy    | Sassari               | 1993-2007                     | 15                       | 1993-2007                    | 0                       |
| Italy    | Sondrio               | 1998-2007                     | 14                       | 1998-2007                    | 0                       |
| Italy    | South Lombard         | 2003-2005                     | 3                        | 2003-2005                    | 0                       |
| Italy    | South Tyrol           | 2003-2007                     | 0                        | NA                           | NA                      |
| Italy    | Syracuse              | 1999-2007                     | 9                        | 1999-2007                    | 0                       |
| Italy    | Torino                | 1984-2007                     | 23                       | 1985-2007                    | 0                       |
| Italy    | Trapani               | 2003-2006                     | 4                        | 2003-2006                    | 0                       |

| Location      | Registry          | Years available from registry | Years used for incidence | Years available for MI ratio | Years used for MI ratio |
|---------------|-------------------|-------------------------------|--------------------------|------------------------------|-------------------------|
| Italy         | Trento            | 2003-2006                     | 4                        | 2003-2006                    | 0                       |
| Italy         | Trieste           | 1983-1992                     | 6                        | 1984-1992                    | 0                       |
| Italy         | Umbria            | 1994-2007                     | 13                       | 1994-2007                    | 1                       |
| Italy         | Varese            | 1976-2007                     | 32                       | 1976-2007                    | 0                       |
| Italy         | Veneto            | 1988-2007                     | 17                       | 1988-2006                    | 0                       |
| Jamaica       | National Registry | 1958-2007                     | 25                       | 1958-2007                    | 0                       |
| Japan         | Aichi             | 1998-2007                     | 11                       | 1998-2007                    | 1                       |
| Japan         | Fukui             | 1998-2007                     | 10                       | 1998-2007                    | 0                       |
| Japan         | Fukuoka           | 1974-1975                     | 2                        | 1974-1975                    | 0                       |
| Japan         | Hiroshima         | 1978-2007                     | 28                       | 1978-2007                    | 0                       |
| Japan         | Miyagi            | 1959-2007                     | 35                       | 1959-2007                    | 0                       |
| Japan         | Nagasaki          | 1973-2007                     | 35                       | 1973-2007                    | 0                       |
| Japan         | National Registry | 1975-2010                     | 36                       | 1958-2013                    | 36                      |
| Japan         | Niigata           | 2003-2007                     | 5                        | 2003-2007                    | 0                       |
| Japan         | Okayama           | 1966-1969                     | 0                        | 1966-1969                    | 0                       |
| Japan         | Osaka             | 1963-2007                     | 38                       | 1963-2007                    | 0                       |
| Japan         | Saga              | 1984-2007                     | 18                       | 1984-2007                    | 0                       |
| Japan         | Yamagata          | 1983-2002                     | 23                       | 1983-2002                    | 0                       |
| Jordan        | National Registry | 2001-2008                     | 8                        | 2001-2008                    | 0                       |
| Kenya         | Nairobi           | 2000-2002                     | 3                        | 2000-2002                    | 0                       |
| Kuwait        | National Registry | 1979-2007                     | 28                       | 1979-2007                    | 0                       |
| Kyrgyzstan    | National Registry | 1986-1987                     | 2                        | 1986-1987                    | 0                       |
| La Martinique | La Martinique     | 1981-2002                     | 0                        | NA                           | NA                      |
| La Reunion    | La Reunion        | 1988-1994                     | 0                        | NA                           | NA                      |
| Latvia        | National Registry | 1983-2007                     | 24                       | 1983-2007                    | 5                       |
| Lebanon       | National Registry | 1998-2007                     | 4                        | 1998-2007                    | 0                       |
| Libya         | Benghazi          | 2003-2005                     | 3                        | 2003-2005                    | 0                       |
| Lithuania     | National Registry | 1978-2011                     | 33                       | 1978-2011                    | 2                       |

| Location    | Registry           | Years available from registry | Years used for incidence | Years available for MI ratio | Years used for MI ratio |
|-------------|--------------------|-------------------------------|--------------------------|------------------------------|-------------------------|
| Malawi      | Blantyre           | 1994-2007                     | 10                       | 1994-2007                    | 0                       |
| Malaysia    | National Registry  | 2003                          | 1                        | 2003                         | 0                       |
| Malaysia    | Penang             | 1998-2007                     | 9                        | 1998-2007                    | 0                       |
| Malaysia    | Sarawak            | 1998-2002                     | 5                        | 1998-2002                    | 0                       |
| Mali        | Bamako             | 1987-1996                     | 11                       | 1987-1996                    | 0                       |
| Malta       | National Registry  | 1969-2010                     | 27                       | 1969-2010                    | 15                      |
| Mongolia    | National Registry  | 2003-2007                     | 0                        | 2003-2007                    | 0                       |
| Morocco     | Greater Casablanca | 2004                          | 1                        | 2004                         | 0                       |
| Mozambique  | Lourenco Marques   | 1956-1960                     | 0                        | 1956-1960                    | 0                       |
| Namibia     | National Registry  | 2000-2009                     | 10                       | 2000-2009                    | 0                       |
| Netherlands | Eindhoven          | 1973-2007                     | 27                       | 1973-2007                    | 0                       |
| Netherlands | Maastricht         | 1986-2002                     | 3                        | 1986-2002                    | 0                       |
| Netherlands | National Registry  | 1989-2015                     | 19                       | 1989-2007                    | 0                       |
| Netherlands | Three Provinces    | 1960-1962                     | 0                        | 1960-1962                    | 0                       |
| New Zealand | National Registry  | 1968-2014                     | 32                       | 1983-2014                    | 5                       |
| Nigeria     | Calabar            | 2009-2013                     | 5                        | 2009-2013                    | 0                       |
| Nigeria     | Ibadan             | 1960-1969                     | 0                        | 1960-1969                    | 0                       |
| Nigeria     | Midwestern Nigeria | NA                            | NA                       | 2008-2009                    | 0                       |
| Norway      | National Registry  | 1953-2014                     | 50                       | 1953-2014                    | 35                      |
| Oman        | National Registry  | 1993-2012                     | 20                       | 1993-2012                    | 0                       |
| Pakistan    | South Karachi      | 1995-2002                     | 8                        | 1995-2002                    | 0                       |
| Palestine   | West Bank          | 2010-2011                     | 2                        | 2010-2011                    | 0                       |
| Panama      | National Registry  | 1988-2011                     | 23                       | 1988-2011                    | 12                      |
| Paraguay    | Asuncion Region    | 1988-1989                     | 2                        | 1988-1989                    | 0                       |
| Peru        | Lima               | 1990-1991                     | 2                        | 1990-1991                    | 0                       |
| Peru        | Trujillo           | 1984-2002                     | 19                       | 1984-2002                    | 1                       |
| Philippines | Manila             | 1983-2007                     | 25                       | 1983-2007                    | 0                       |
| Philippines | Rizal              | 1978-2007                     | 20                       | 1978-2007                    | 0                       |

| Location    | Registry                 | Years available from registry | Years used for incidence | Years available for MI ratio | Years used for MI ratio |
|-------------|--------------------------|-------------------------------|--------------------------|------------------------------|-------------------------|
| Poland      | Cieszyn                  | 1968-1977                     | 5                        | 1973-1977                    | 0                       |
| Poland      | Cieszyn and Nowy Sacz    | 1968-1972                     | 5                        | 1968-1972                    | 0                       |
| Poland      | Cracow                   | 1968-2006                     | 26                       | 1973-2006                    | 0                       |
| Poland      | Cracow City and District | 1965-1972                     | 5                        | 1965-1972                    | 0                       |
| Poland      | Four Rural Areas         | 1965-1966                     | 0                        | 1965-1966                    | 0                       |
| Poland      | Katowice                 | 1965-1977                     | 5                        | 1965-1974                    | 0                       |
| Poland      | Kielce                   | 1988-2007                     | 13                       | 1988-2007                    | 0                       |
| Poland      | Lower Silesia            | 1984-2007                     | 14                       | 1984-2007                    | 0                       |
| Poland      | National Registry        | 1999-2011                     | 13                       | 1999-2011                    | 13                      |
| Poland      | Nowy Sacz                | 1973-1986                     | 13                       | 1973-1986                    | 0                       |
| Poland      | Opole                    | 1985-1987                     | 3                        | 1985-1987                    | 0                       |
| Poland      | Rzeszow                  | 2003-2007                     | 0                        | 2003-2007                    | 0                       |
| Poland      | Warsaw                   | 1988-2002                     | 11                       | 1988-2002                    | 0                       |
| Poland      | Warsaw Rural             | 1968-1987                     | 15                       | 1968-1987                    | 0                       |
| Poland      | Warsaw Urban             | 1965-2002                     | 27                       | 1965-2002                    | 0                       |
| Portugal    | Azores                   | 1997-2011                     | 14                       | 1981-2012                    | 15                      |
| Portugal    | Centre                   | 2003-2007                     | 5                        | 2003-2007                    | 5                       |
| Portugal    | North Portugal           | 2000-2006                     | 7                        | 2000-2006                    | 7                       |
| Portugal    | Porto                    | 1998-2002                     | 5                        | 1998-2002                    | 0                       |
| Portugal    | South Portugal           | 1998-2007                     | 10                       | 1998-2007                    | 0                       |
| Portugal    | Vila Nova de Gaia        | 1983-1997                     | 10                       | 1983-1997                    | 0                       |
| Puerto Rico | National Registry        | NA                            | 26                       | NA                           | NA                      |
| Qatar       | National Registry        | 2003-2007                     | 5                        | 2003-2007                    | 0                       |
| Romania     | Banat Region             | 1967                          | 0                        | 1967                         | 0                       |
| Romania     | Cluj                     | 2007                          | 1                        | 2007                         | 1                       |
| Romania     | County Cluj              | 1974-1987                     | 14                       | 1974-1987                    | 0                       |
| Romania     | County Timis             | 1970-1972                     | 3                        | 1970-1972                    | 0                       |
| Romania     | Timisoara                | 2008                          | 1                        | 2008                         | 0                       |

| Location     | Registry            | Years available from registry | Years used for incidence | Years available for MI ratio | Years used for MI ratio |
|--------------|---------------------|-------------------------------|--------------------------|------------------------------|-------------------------|
| Russia       | St Petersburg       | 1983-2007                     | 19                       | 1983-2007                    | 0                       |
| Samoa        | National Registry   | 1980-1988                     | 9                        | 1980-1988                    | 0                       |
| Saudi Arabia | National Registry   | 1994-2012                     | 10                       | 1994-2012                    | 0                       |
| Saudi Arabia | Riyadh              | 2003-2007                     | 5                        | 2003-2007                    | 0                       |
| Senegal      | Dakar               | 1969-1974                     | 6                        | 1969-1974                    | 0                       |
| Serbia       | Central Serbia      | 2003-2007                     | 4                        | 2003-2007                    | 5                       |
| Serbia       | National Registry   | 1999-2002                     | 4                        | 1999-2002                    | 0                       |
| Serbia       | Vojvodina           | 1988-1997                     | 10                       | 1988-1997                    | 0                       |
| Seychelles   | National Registry   | 2009-2011                     | 3                        | 2009-2011                    | 0                       |
| Singapore    | National Registry   | 1950-2008                     | 44                       | 1950-2008                    | 0                       |
| Slovakia     | National Registry   | 1968-2007                     | 42                       | 1968-2010                    | 30                      |
| Slovenia     | National Registry   | 1956-2010                     | 49                       | 1956-2010                    | 8                       |
| South Africa | Johannesburg, Bantu | 1953-1955                     | 0                        | 1953-1955                    | 0                       |
| South Africa | National Registry   | 2003-2011                     | 4                        | 2003-2011                    | 0                       |
| South Africa | PROMECC             | 1998-2007                     | 10                       | 1998-2007                    | 0                       |
| South Korea  | Busan               | 1996-2007                     | 2                        | 1996-2007                    | 0                       |
| South Korea  | Daegu               | 1997-2007                     | 2                        | 1997-2007                    | 0                       |
| South Korea  | Daejeon             | 1998-2007                     | 0                        | 1998-2007                    | 0                       |
| South Korea  | Gwangju             | 1998-2007                     | 0                        | 1998-2007                    | 0                       |
| South Korea  | Incheon             | 1998-2007                     | 0                        | 1998-2007                    | 0                       |
| South Korea  | Jeju                | 2000-2007                     | 3                        | 2000-2007                    | 0                       |
| South Korea  | Kangwha County      | 1986-1997                     | 12                       | 1986-1997                    | 0                       |
| South Korea  | National Registry   | 1999-2012                     | 12                       | 1999-2012                    | 0                       |
| South Korea  | Seoul               | 1993-2007                     | 5                        | 1993-2007                    | 0                       |
| South Korea  | Ulsan               | 1999-2007                     | 0                        | 1999-2007                    | 0                       |
| Spain        | Albacete            | 1991-2007                     | 16                       | 1991-2007                    | 6                       |
| Spain        | Asturias            | 1988-2007                     | 17                       | 1988-2007                    | 5                       |
| Spain        | Balears             | 1988-2005                     | 18                       | 1988-2005                    | 0                       |



| Location    | Registry                | Years available from registry | Years used for incidence | Years available for MI ratio | Years used for MI ratio |
|-------------|-------------------------|-------------------------------|--------------------------|------------------------------|-------------------------|
| Spain       | Basque Country          | 1986-2007                     | 20                       | 1986-2008                    | 4                       |
| Spain       | Canary Islands          | 1993-2006                     | 10                       | 1993-2006                    | 0                       |
| Spain       | Ciudad Real             | 2004-2007                     | 4                        | 2004-2007                    | 0                       |
| Spain       | Cuenca                  | 1993-2007                     | 15                       | 1993-2007                    | 5                       |
| Spain       | Girona                  | 1980-2007                     | 27                       | 1980-2008                    | 23                      |
| Spain       | Granada                 | 1985-2007                     | 22                       | 1985-2007                    | 23                      |
| Spain       | La Rioja                | 1993-2007                     | 12                       | 1993-2007                    | 13                      |
| Spain       | Mallorca                | 1988-2007                     | 14                       | 1988-2007                    | 0                       |
| Spain       | Murcia                  | 1983-2007                     | 24                       | 1983-2007                    | 25                      |
| Spain       | Navarra                 | 1973-2007                     | 32                       | 1973-2008                    | 31                      |
| Spain       | Tarragona               | 1980-2007                     | 25                       | 1980-2007                    | 24                      |
| Spain       | Zaragoza                | 1968-2000                     | 33                       | 1968-2000                    | 0                       |
| Sri Lanka   | National Registry       | 2001-2005                     | 6                        | 2001-2005                    | 0                       |
| Sweden      | National Registry       | 1958-2014                     | 50                       | 1958-2014                    | 35                      |
| Sweden      | Stockholm               | 1990-2010                     | 21                       | 1990-2010                    | 0                       |
| Sweden      | Sweden except Stockholm | 1990-2010                     | 21                       | 1990-2010                    | 0                       |
| Switzerland | Basel                   | 1981-2007                     | 7                        | 1981-2007                    | 0                       |
| Switzerland | Geneva                  | 1970-2008                     | 19                       | 1970-2008                    | 29                      |
| Switzerland | Graubunden              | 1989-1997                     | 0                        | 1989-1997                    | 0                       |
| Switzerland | Graubunden and Glarus   | 1989-2009                     | 0                        | 1980-2009                    | 20                      |
| Switzerland | National Registry       | 1986-2013                     | 25                       | 1989-2013                    | 0                       |
| Switzerland | Neuchatel               | 1974-2007                     | 13                       | 1974-2008                    | 5                       |
| Switzerland | St Gallen - Appenzell   | 1980-2009                     | 9                        | 1980-2009                    | 29                      |
| Switzerland | Ticino                  | 1996-2007                     | 0                        | 1996-2007                    | 0                       |
| Switzerland | Valais                  | 1989-2007                     | 0                        | 1989-2007                    | 0                       |
| Switzerland | Vaud                    | 1975-2007                     | 13                       | 1975-2008                    | 5                       |
| Switzerland | Zurich                  | 1980-2009                     | 9                        | 1980-2009                    | 0                       |
| Taiwan      | National Registry       | 1980-2007                     | 28                       | 1980-2007                    | 28                      |

| Location            | Registry          | Years available from registry | Years used for incidence | Years available for MI ratio | Years used for MI ratio |
|---------------------|-------------------|-------------------------------|--------------------------|------------------------------|-------------------------|
| Thailand            | Bangkok           | 1995-2007                     | 11                       | 1995-2007                    | 0                       |
| Thailand            | Chiang Mai        | 1983-2007                     | 29                       | 1983-2007                    | 0                       |
| Thailand            | Chonburi          | 2001-2007                     | 8                        | 2001-2007                    | 0                       |
| Thailand            | Khon Kaen         | 1988-2007                     | 19                       | 1988-2007                    | 0                       |
| Thailand            | Lampang           | 1993-2007                     | 18                       | 1993-2007                    | 0                       |
| Thailand            | Lop Buri          | 2001-2003                     | 3                        | 2001-2003                    | 0                       |
| Thailand            | Nakhon Phanom     | 2001-2003                     | 3                        | 2001-2003                    | 0                       |
| Thailand            | Prachuap Khiri    | 2001-2003                     | 3                        | 2001-2003                    | 0                       |
| Thailand            | Rayong            | 2001-2003                     | 3                        | 2001-2003                    | 0                       |
| Thailand            | Songkhla          | 1993-2007                     | 16                       | 1993-2007                    | 0                       |
| Thailand            | Surat Thani       | 2001-2003                     | 3                        | 2001-2003                    | 0                       |
| Thailand            | Ubon Ratchathani  | 2001-2003                     | 3                        | 2001-2003                    | 0                       |
| Thailand            | Udon Thani        | 2001-2003                     | 3                        | 2001-2003                    | 0                       |
| The Gambia          | National Registry | 1987-1998                     | 15                       | 1987-1998                    | 0                       |
| Trinidad and Tobago | National Registry | 1995-2006                     | 12                       | 1995-2006                    | 12                      |
| Tunisia             | Centre Sousse     | 1998-2002                     | 5                        | 1998-2002                    | 0                       |
| Tunisia             | North Tunisia     | 2003-2005                     | 3                        | 2003-2005                    | 0                       |
| Turkey              | Ankara            | 2002-2005                     | 4                        | 2002-2005                    | 0                       |
| Turkey              | Antalya           | 1998-2008                     | 13                       | 1998-2008                    | 0                       |
| Turkey              | Edirne            | 2002-2007                     | 6                        | 2002-2007                    | 0                       |
| Turkey              | Eight Provinces   | 2006-2007                     | 2                        | 2006-2007                    | 0                       |
| Turkey              | Erzurum           | 2002-2005                     | 4                        | 2002-2005                    | 0                       |
| Turkey              | Eskisehir         | 2002-2005                     | 4                        | 2002-2005                    | 0                       |
| Turkey              | Izmir             | 1998-2008                     | 14                       | 1998-2008                    | 0                       |
| Turkey              | Nine Provinces    | 2008                          | 1                        | 2008                         | 0                       |
| Turkey              | Samsun            | 2002-2005                     | 4                        | 2002-2005                    | 0                       |
| Turkey              | Trabzon           | 2002-2007                     | 5                        | 2002-2007                    | 0                       |

| Location       | Registry                       | Years available from registry | Years used for incidence | Years available for MI ratio | Years used for MI ratio |
|----------------|--------------------------------|-------------------------------|--------------------------|------------------------------|-------------------------|
| Uganda         | Kampala                        | 1954-2013                     | 24                       | 1954-2013                    | 0                       |
| Ukraine        | National Registry              | 2000-2010                     | 7                        | 2000-2010                    | 4                       |
| United Kingdom | Aryshire                       | 1970-1972                     | 3                        | 1970-1972                    | 0                       |
| United Kingdom | East Anglia                    | 1988-1997                     | 0                        | 1988-1997                    | 0                       |
| United Kingdom | East Midlands                  | 1981-2014                     | 34                       | 1981-2014                    | 20                      |
| United Kingdom | East Scotland                  | 1973-1987                     | 5                        | 1973-1987                    | 0                       |
| United Kingdom | East of England                | 1981-2014                     | 33                       | 1981-2014                    | 20                      |
| United Kingdom | England                        | 1993-2007                     | 10                       | 1993-2007                    | 0                       |
| United Kingdom | England and Wales              | 1979-1990                     | 0                        | 1979-1990                    | 0                       |
| United Kingdom | Greater London                 | 1981-2014                     | 34                       | 1981-2014                    | 20                      |
| United Kingdom | Merseyside and Cheshire        | 1959-2002                     | 11                       | 1959-2002                    | 0                       |
| United Kingdom | North East England             | 1981-2014                     | 34                       | 1981-2014                    | 20                      |
| United Kingdom | North East Scotland            | 1973-1987                     | 5                        | 1973-1987                    | 0                       |
| United Kingdom | North Scotland                 | 1973-1987                     | 5                        | 1973-1987                    | 0                       |
| United Kingdom | North West England             | 1973-2014                     | 40                       | 1973-2014                    | 20                      |
| United Kingdom | Northern England and Yorkshire | 1998-2007                     | 0                        | 1998-2007                    | 0                       |
| United Kingdom | Northern Ireland               | 1993-2011                     | 18                       | 1993-2011                    | 0                       |
| United Kingdom | Oxford                         | 1963-2007                     | 18                       | 1963-2007                    | 0                       |
| United Kingdom | Scotland                       | 1963-2014                     | 40                       | 1963-2014                    | 25                      |
| United Kingdom | South East England             | 1981-2014                     | 34                       | 1981-2014                    | 20                      |
| United Kingdom | South East Scotland            | 1973-1987                     | 5                        | 1973-1987                    | 0                       |
| United Kingdom | South Thames                   | 1960-2007                     | 20                       | 1960-1997                    | 0                       |
| United Kingdom | South West England             | 1960-2014                     | 37                       | 1960-2014                    | 20                      |
| United Kingdom | Thames                         | 1998-2007                     | 0                        | 1991-2007                    | 0                       |
| United Kingdom | Trent                          | 1963-2007                     | 3                        | 1963-2007                    | 0                       |
| United Kingdom | Wales                          | 1981-2011                     | 31                       | 1981-2011                    | 20                      |
| United Kingdom | Wessex                         | 1988-1992                     | 0                        | 1988-1992                    | 0                       |
| United Kingdom | West Midlands                  | 1960-2014                     | 44                       | 1960-2014                    | 20                      |

| Location       | Registry                         | Years available from registry | Years used for incidence | Years available for MI ratio | Years used for MI ratio |
|----------------|----------------------------------|-------------------------------|--------------------------|------------------------------|-------------------------|
| United Kingdom | West Scotland                    | 1975-1992                     | 0                        | 1975-1992                    | 0                       |
| United Kingdom | Yorkshire                        | 1983-2002                     | 7                        | 1983-2002                    | 0                       |
| United Kingdom | Yorkshire and the Humber         | 1981-2014                     | 34                       | 1981-2014                    | 20                      |
| United States  | Alabama                          | 1998-2011                     | 10                       | 1998-2007                    | 0                       |
| United States  | Alameda County                   | 1969-1987                     | 5                        | 1983-1987                    | 0                       |
| United States  | Alaska                           | 1998-2011                     | 10                       | 1998-2007                    | 0                       |
| United States  | Alaska Natives                   | 1992-2013                     | 0                        | NA                           | NA                      |
| United States  | Arizona                          | 1998-2011                     | 10                       | 1998-2007                    | 0                       |
| United States  | Arkansas                         | 2001-2011                     | 5                        | 2003-2007                    | 0                       |
| United States  | Atlanta                          | 1973-2013                     | 39                       | 1973-2013                    | 36                      |
| United States  | California                       | 1998-2011                     | 10                       | 1998-2007                    | 0                       |
| United States  | California except SF, SJ-M, & LA | 2000-2013                     | 14                       | 2000-2013                    | 9                       |
| United States  | Central California               | 1988-1992                     | 5                        | 1988-1992                    | 0                       |
| United States  | Colorado                         | 1998-2011                     | 10                       | 1998-2007                    | 0                       |
| United States  | Connecticut                      | 1960-2013                     | 41                       | 1960-2013                    | 37                      |
| United States  | Delaware                         | 1999-2011                     | 5                        | 2003-2007                    | 0                       |
| United States  | Detroit                          | 1969-2013                     | 41                       | 1973-2013                    | 37                      |
| United States  | District of Columbia             | 1998-2011                     | 5                        | 1998-2002                    | 0                       |
| United States  | El Paso                          | 1960-1970                     | 0                        | 1960-1970                    | 0                       |
| United States  | Florida                          | 1998-2011                     | 10                       | 1998-2007                    | 0                       |
| United States  | Georgia                          | 1998-2011                     | 10                       | 1998-2007                    | 0                       |
| United States  | Greater Georgia                  | 1973-2013                     | 14                       | 1973-2013                    | 13                      |
| United States  | Hawaii                           | 1960-2013                     | 46                       | 1960-2013                    | 37                      |
| United States  | Idaho                            | 1998-2011                     | 10                       | 1998-2007                    | 0                       |
| United States  | Illinois                         | 1998-2011                     | 10                       | 1998-2007                    | 0                       |
| United States  | Indiana                          | 1998-2011                     | 10                       | 1998-2007                    | 0                       |
| United States  | Iowa                             | 1969-2013                     | 41                       | 1973-2013                    | 37                      |
| United States  | Kansas                           | 1999-2011                     | 0                        | NA                           | NA                      |

| Location      | Registry                      | Years available from registry | Years used for incidence | Years available for MI ratio | Years used for MI ratio |
|---------------|-------------------------------|-------------------------------|--------------------------|------------------------------|-------------------------|
| United States | Kentucky                      | 1973-2013                     | 19                       | 1973-2013                    | 19                      |
| United States | Los Angeles                   | 1973-2013                     | 41                       | 1973-2013                    | 24                      |
| United States | Louisiana                     | 1973-2013                     | 29                       | 1973-2013                    | 18                      |
| United States | Maine                         | 1998-2011                     | 10                       | 1998-2007                    | 0                       |
| United States | Maryland                      | 1999-2011                     | 0                        | NA                           | NA                      |
| United States | Massachusetts                 | 1998-2011                     | 10                       | 1998-2007                    | 0                       |
| United States | Michigan                      | 1998-2011                     | 10                       | 1998-2007                    | 0                       |
| United States | Minnesota                     | 1999-2011                     | 0                        | NA                           | NA                      |
| United States | Mississippi                   | 2003-2011                     | 5                        | 2003-2007                    | 0                       |
| United States | Missouri                      | 1998-2011                     | 10                       | 1998-2007                    | 0                       |
| United States | Montana                       | 1998-2011                     | 10                       | 1998-2007                    | 0                       |
| United States | National Registry             | 1962-2007                     | 0                        | 1962-2007                    | 0                       |
| United States | Nebraska                      | 1999-2011                     | 5                        | 2003-2007                    | 0                       |
| United States | Nevada                        | 1959-2010                     | 0                        | 1959-1966                    | 0                       |
| United States | New Hampshire                 | 1999-2011                     | 5                        | 2003-2007                    | 0                       |
| United States | New Jersey                    | 1973-2013                     | 24                       | 1973-2013                    | 19                      |
| United States | New Mexico                    | 1969-2013                     | 45                       | 1969-2013                    | 37                      |
| United States | New Orleans                   | 1974-2007                     | 17                       | 1983-2007                    | 0                       |
| United States | New York                      | 1993-2011                     | 15                       | 1993-2007                    | 0                       |
| United States | New York City                 | 1978-1987                     | 0                        | NA                           | NA                      |
| United States | New York except New York City | 1959-1987                     | 0                        | 1959-1961                    | 0                       |
| United States | North Carolina                | 1999-2011                     | 5                        | 2003-2007                    | 0                       |
| United States | North Dakota                  | 1999-2011                     | 5                        | 2003-2007                    | 0                       |
| United States | Ohio                          | 1998-2011                     | 10                       | 1998-2007                    | 0                       |
| United States | Oklahoma                      | 1998-2011                     | 10                       | 1998-2007                    | 0                       |
| United States | Oregon                        | 1998-2011                     | 10                       | 1998-2007                    | 0                       |
| United States | Pennsylvania                  | 1998-2011                     | 10                       | 1998-2007                    | 0                       |
| United States | Rhode Island                  | 1998-2011                     | 10                       | 1998-2007                    | 0                       |

| Location      | Registry                                                | Years available from registry | Years used for incidence | Years available for MI ratio | Years used for MI ratio |
|---------------|---------------------------------------------------------|-------------------------------|--------------------------|------------------------------|-------------------------|
| United States | Rural Georgia                                           | 1973-2013                     | 22                       | 1973-2013                    | 24                      |
| United States | San Francisco                                           | 1969-2007                     | 29                       | 1973-2007                    | 0                       |
| United States | San Francisco, Oakland, San Mateo, and Surrounding Area | 1973-2013                     | 41                       | 1973-2013                    | 36                      |
| United States | San Jose Monterey                                       | 1973-2013                     | 22                       | 1973-2013                    | 24                      |
| United States | Seattle                                                 | 1973-2013                     | 40                       | 1973-2013                    | 36                      |
| United States | South Carolina                                          | 1998-2011                     | 10                       | 1998-2007                    | 0                       |
| United States | South Dakota                                            | 2001-2011                     | 5                        | 2003-2007                    | 0                       |
| United States | Tennessee                                               | 2003-2011                     | 5                        | 2003-2007                    | 0                       |
| United States | Texas                                                   | 1998-2011                     | 10                       | 1998-2007                    | 0                       |
| United States | Utah                                                    | 1966-2013                     | 41                       | 1973-2013                    | 37                      |
| United States | Vermont                                                 | 1998-2011                     | 10                       | 1998-2007                    | 0                       |
| United States | Virginia                                                | 2003-2011                     | 5                        | 2003-2007                    | 0                       |
| United States | Washington                                              | 1998-2011                     | 10                       | 1998-2007                    | 0                       |
| United States | West Virginia                                           | 1998-2011                     | 10                       | 1998-2007                    | 0                       |
| United States | Wisconsin                                               | 1998-2011                     | 10                       | 1998-2007                    | 0                       |
| United States | Wyoming                                                 | 1999-2011                     | 5                        | 2003-2007                    | 0                       |
| Uruguay       | Montevideo                                              | 1990-1995                     | 6                        | 1990-1995                    | 0                       |
| Uruguay       | National Registry                                       | 2002-2007                     | 8                        | 2002-2007                    | 0                       |
| Vietnam       | Hanoi                                                   | 1991-1997                     | 8                        | 1991-1997                    | 0                       |
| Vietnam       | Ho Chi Minh                                             | 1995-1998                     | 4                        | 1995-1998                    | 0                       |
| Zimbabwe      | Bulawayo                                                | 1963-1972                     | 5                        | 1963-1972                    | 0                       |
| Zimbabwe      | Harare                                                  | 1990-2006                     | 17                       | 1990-2006                    | 0                       |
| Zimbabwe      | National Registry                                       | 2005-2006                     | 2                        | 2005-2006                    | 0                       |

eTable 3: Number of site-years for cancer mortality data by type

| Cause                                              | VR<br>GBD<br>2015 | VR<br>GBD<br>2016 | VR<br>change<br>GBD 2015<br>to GBD<br>2016 | VA<br>GBD<br>2015 | VA<br>GBD<br>2016 | VA change<br>GBD 2015<br>to GBD<br>2016 | CR<br>GBD<br>2015 | CR<br>GBD<br>2016 | CR change<br>GBD 2015<br>to GBD<br>2016 | Total<br>GBD<br>2015 | Total<br>GBD<br>2016 | Total<br>change<br>GBD 2015<br>to GBD<br>2016 |
|----------------------------------------------------|-------------------|-------------------|--------------------------------------------|-------------------|-------------------|-----------------------------------------|-------------------|-------------------|-----------------------------------------|----------------------|----------------------|-----------------------------------------------|
| Lip and oral cavity cancer                         | 10049             | 15962             | 59%                                        | 134               | 585               | 337%                                    | 2399              | 2758              | 15%                                     | 12582                | 19305                | 53%                                           |
| Nasopharynx cancer                                 | 10070             | 15988             | 59%                                        |                   |                   |                                         | 2354              | 2806              | 19%                                     | 12424                | 18794                | 51%                                           |
| Other pharynx cancer                               | 10050             | 15967             | 59%                                        |                   | 374               |                                         | 2323              | 2782              | 20%                                     | 12373                | 19123                | 55%                                           |
| Esophageal cancer                                  | 10408             | 16298             | 57%                                        | 132               | 590               | 347%                                    | 2411              | 2849              | 18%                                     | 12951                | 19737                | 52%                                           |
| Stomach cancer                                     | 10414             | 16304             | 57%                                        |                   | 374               |                                         | 2432              | 2873              | 18%                                     | 12846                | 19551                | 52%                                           |
| Colon and rectum cancer                            | 10413             | 16303             | 57%                                        | 134               | 602               | 349%                                    | 2432              | 2873              | 18%                                     | 12979                | 19778                | 52%                                           |
| Liver cancer                                       | 10118             | 16028             | 58%                                        |                   | 374               |                                         | 2419              | 2859              | 18%                                     | 12537                | 19261                | 54%                                           |
| Gallbladder and biliary tract cancer               | 10090             | 14972             | 48%                                        |                   |                   |                                         | 2331              | 2779              | 19%                                     | 12421                | 17751                | 43%                                           |
| Pancreatic cancer                                  | 9796              | 15701             | 60%                                        |                   |                   |                                         | 2418              | 2862              | 18%                                     | 12214                | 18563                | 52%                                           |
| Larynx cancer                                      | 10390             | 16280             | 57%                                        |                   | 374               |                                         | 2405              | 2846              | 18%                                     | 12795                | 19500                | 52%                                           |
| Tracheal, bronchus, and lung cancer                | 10413             | 16303             | 57%                                        | 147               | 602               | 310%                                    | 2413              | 2853              | 18%                                     | 12973                | 19758                | 52%                                           |
| Malignant skin melanoma                            | 10103             | 16018             | 59%                                        |                   |                   |                                         | 2305              | 2704              | 17%                                     | 12408                | 18722                | 51%                                           |
| Non-melanoma skin cancer                           | 9680              | 15581             | 61%                                        |                   |                   |                                         | 1230              |                   | -100%                                   | 10910                | 15581                | 43%                                           |
| Non-melanoma skin cancer (squamous-cell carcinoma) | 8526              | 14204             | 67%                                        |                   |                   |                                         | 1230              |                   | -100%                                   | 9756                 | 14204                | 46%                                           |
| Breast cancer                                      | 10403             | 16294             | 57%                                        | 153               | 618               | 304%                                    | 2417              | 2861              | 18%                                     | 12973                | 19773                | 52%                                           |

| Cause                              | VR<br>GBD<br>2015 | VR<br>GBD<br>2016 | VR<br>change<br>GBD 2015<br>to GBD<br>2016 | VA<br>GBD<br>2015 | VA<br>GBD<br>2016 | VA change<br>GBD 2015<br>to GBD<br>2016 | CR<br>GBD<br>2015 | CR<br>GBD<br>2016 | CR change<br>GBD 2015<br>to GBD<br>2016 | Total<br>GBD<br>2015 | Total<br>GBD<br>2016 | Total<br>change<br>GBD 2015<br>to GBD<br>2016 |
|------------------------------------|-------------------|-------------------|--------------------------------------------|-------------------|-------------------|-----------------------------------------|-------------------|-------------------|-----------------------------------------|----------------------|----------------------|-----------------------------------------------|
| Cervical cancer                    | 10406             | 16295             | 57%                                        |                   | 370               |                                         | 2382              | 2809              | 18%                                     | 12788                | 19474                | 52%                                           |
| Uterine cancer                     | 10325             | 16280             | 58%                                        |                   | 374               |                                         | 2373              | 2831              | 19%                                     | 12698                | 19485                | 53%                                           |
| Ovarian cancer                     | 9802              | 15710             | 60%                                        |                   |                   |                                         | 2371              | 2845              | 20%                                     | 12173                | 18555                | 52%                                           |
| Prostate cancer                    | 10356             | 16247             | 57%                                        |                   |                   |                                         | 2351              | 2826              | 20%                                     | 12707                | 19073                | 50%                                           |
| Testicular cancer                  | 8869              | 14549             | 64%                                        | 84                | 130               | 55%                                     | 2274              | 2734              | 20%                                     | 11227                | 17413                | 55%                                           |
| Kidney cancer                      | 10095             | 16010             | 59%                                        |                   |                   |                                         | 2387              | 2716              | 14%                                     | 12482                | 18726                | 50%                                           |
| Bladder cancer                     | 10100             | 16010             | 59%                                        |                   |                   |                                         | 2426              | 2656              | 9%                                      | 12526                | 18666                | 49%                                           |
| Brain and nervous<br>system cancer | 9801              | 15705             | 60%                                        | 1                 | 378               | 37700%                                  | 2418              | 2885              | 19%                                     | 12220                | 18968                | 55%                                           |
| Thyroid cancer                     | 9713              | 15634             | 61%                                        |                   |                   |                                         | 2375              | 2826              | 19%                                     | 12088                | 18460                | 53%                                           |
| Mesothelioma                       | 9095              | 7418              | -18%                                       |                   |                   |                                         | 1293              |                   | -100%                                   | 10388                | 7418                 | -29%                                          |
| Hodgkin<br>lymphoma                | 10078             | 15991             | 59%                                        |                   |                   |                                         | 2289              | 2762              | 21%                                     | 12367                | 18753                | 52%                                           |
| Non-Hodgkin<br>lymphoma            | 10102             | 16011             | 58%                                        |                   |                   |                                         | 2394              | 2860              | 19%                                     | 12496                | 18871                | 51%                                           |
| Multiple myeloma                   | 10086             | 16005             | 59%                                        |                   |                   |                                         | 2294              | 2737              | 19%                                     | 12380                | 18742                | 51%                                           |
| Leukemia                           | 10964             | 16851             | 54%                                        |                   | 585               |                                         | 2396              | 2925              | 22%                                     | 13360                | 20361                | 52%                                           |
| Acute lymphoid<br>leukemia         | 8236              | 13930             | 69%                                        |                   |                   |                                         | 260               | 1130              | 335%                                    | 8496                 | 15060                | 77%                                           |
| Chronic lymphoid<br>leukemia       | 8226              | 13926             | 69%                                        |                   |                   |                                         | 249               | 1104              | 343%                                    | 8475                 | 15030                | 77%                                           |
| Acute myeloid<br>leukemia          | 8235              | 13930             | 69%                                        |                   |                   |                                         | 259               | 1118              | 332%                                    | 8494                 | 15048                | 77%                                           |
| Chronic myeloid<br>leukemia        | 8234              | 13930             | 69%                                        |                   |                   |                                         | 259               | 1124              | 334%                                    | 8493                 | 15054                | 77%                                           |
| Other leukemia                     |                   | 15986             |                                            |                   | 211               |                                         |                   | 1913              |                                         |                      | 18110                |                                               |
| Other neoplasms                    | 10486             | 16149             | 54%                                        |                   |                   |                                         | 2444              | 2951              | 21%                                     | 12930                | 19100                | 48%                                           |

VR: vital registration system data, VA: verbal autopsy data, CR: cancer registry data



eTable 4: List of International Classification of Diseases (ICD) codes mapped to the Global Burden of Disease cause list for cancer incidence data

| Cause                                              | ICD10                                                                                                                          | ICD9                                                                                  |
|----------------------------------------------------|--------------------------------------------------------------------------------------------------------------------------------|---------------------------------------------------------------------------------------|
| Lip and oral cavity cancer                         | C00-C07, C08-C08.9, Z85.81-Z85.810                                                                                             | 140-145.9, V76.42                                                                     |
| Nasopharynx cancer                                 | C11-C11.9                                                                                                                      | 147-147.9                                                                             |
| Other pharynx cancer                               | C09-C10.9, C12-C13.9                                                                                                           | 146-146.9, 148-148.9                                                                  |
| Esophageal cancer                                  | C15-C15.9, Z85.01                                                                                                              | 150-150.9                                                                             |
| Stomach cancer                                     | C16-C16.9, Z12.0, Z85.02-Z85.028                                                                                               | 151-151.9, 209.23, V10.04                                                             |
| Colon and rectum cancer                            | C18-C19.0, C20, C21-C21.8, Z12.1-Z12.13, Z85.03-Z85.048, Z86.010                                                               | 153-154.9, 209.1-209.17, V10.05-V10.06, V76.41, V76.5-V76.52                          |
| Liver cancer                                       | C22-C22.4, C22.7-C22.9, Z85.05                                                                                                 | 155-155.9, V10.07                                                                     |
| Liver cancer due to hepatitis B                    |                                                                                                                                |                                                                                       |
| Liver cancer due to hepatitis C                    |                                                                                                                                |                                                                                       |
| Liver cancer due to alcohol use                    |                                                                                                                                |                                                                                       |
| Liver cancer due to other causes                   |                                                                                                                                |                                                                                       |
| Gallbladder and biliary tract cancer               | C23, C24-C24.9                                                                                                                 | 156-156.9                                                                             |
| Pancreatic cancer                                  | C25-C25.9, Z85.07                                                                                                              | 157-157.9                                                                             |
| Larynx cancer                                      | C32-C32.9, Z85.21                                                                                                              | 161-161.9, V10.21                                                                     |
| Tracheal, bronchus, and lung cancer                | C33, C34-C34.92, Z12.2, Z80.1-Z80.2, Z85.1-Z85.20                                                                              | 162-162.9, 209.21, V10.1-V10.20, V16.1-V16.2, V16.4-V16.40                            |
| Malignant skin melanoma                            | C43-C43.9, Z85.82-Z85.828                                                                                                      | 172-172.9                                                                             |
| Non-melanoma skin cancer                           | C44-C44.99                                                                                                                     | 173-173.99, 216-216.9, 232-232.9                                                      |
| Non-melanoma skin cancer (squamous-cell carcinoma) | C44.02, C44.12-C44.129, C44.22-C44.229, C44.32-C44.329, C44.42, C44.52-C44.529, C44.62-C44.629, C44.72-C44.729, C44.82, C44.92 | 173.02, 173.12, 173.22, 173.32, 173.42, 173.52, 173.62, 173.72, 173.82, 173.92        |
| Non-melanoma skin cancer (basal-cell carcinoma)    | C44.01, C44.11-C44.119, C44.21-C44.219, C44.31-C44.319, C44.41, C44.51-C44.519, C44.61-C44.619, C44.71-C44.719, C44.81, C44.91 | 173.01, 173.11, 173.21, 173.31, 173.41, 173.51, 173.60-173.61, 173.71, 173.81, 173.91 |

| <b>Cause</b>                    | <b>ICD10</b>                                                                      | <b>ICD9</b>                                             |
|---------------------------------|-----------------------------------------------------------------------------------|---------------------------------------------------------|
| Breast cancer                   | C50-C50.629, C50.8-C50.929, Z12.3-Z12.39, Z80.3, Z85.3, Z86.000                   | 174-175.9, V10.3, V16.3                                 |
| Cervical cancer                 | C53-C53.9, Z12.4, Z85.41                                                          | 180-180.9, V10.41, V72.32                               |
| Uterine cancer                  | C54-C54.3, C54.8-C54.9, Z85.42, Z86.001                                           | 182-182.9                                               |
| Ovarian cancer                  | C56-C56.2, C56.9, Z80.41, Z85.43                                                  | 183-183.0, 183.8-183.9, V10.43, V16.41                  |
| Prostate cancer                 | C61-C61.9, Z12.5, Z80.42, Z85.46                                                  | 185-185.9, V10.46, V16.42, V76.44                       |
| Testicular cancer               | C62-C62.92, Z80.43, Z85.47-Z85.48                                                 | 186-186.9, V10.47-V10.48, V16.43                        |
| Kidney cancer                   | C64-C64.2, C64.9-C65.9, Z80.51, Z85.52-Z85.54                                     | 189-189.1, 189.5-189.6, 209.24                          |
| Bladder cancer                  | C67-C67.9, Z12.6-Z12.79, Z80.52, Z85.51                                           | 188-188.9, V10.51, V16.52, V76.3                        |
| Brain and nervous system cancer | C70-C70.1, C70.9-C72.9, Z85.841-Z85.848, Z86.011                                  | 191-191.9                                               |
| Thyroid cancer                  | C73, Z85.850                                                                      | 193-193.9                                               |
| Mesothelioma                    | C45-C45.2, C45.7, C45.9                                                           |                                                         |
| Hodgkin lymphoma                | C81-C81.49, C81.7-C81.79, C81.9-C81.99, Z85.71-Z85.72                             | 201-201.98, V10.72                                      |
| Non-Hodgkin lymphoma            | C82-C85.29, C85.7-C86.6, C96-C96.9                                                | 200-200.9, 202-202.98                                   |
| Multiple myeloma                | C88-C90.32                                                                        | 203-203.9                                               |
| Leukemia                        | C91-C93.7, C93.9-C95.2, C95.7-C95.92, Z80.6, Z85.6                                | 204-208.92, V10.59-V10.69, V16.6                        |
| Acute lymphoid leukemia         | C91.0-C91.02                                                                      | 204.0-204.02                                            |
| Chronic lymphoid leukemia       | C91.1-C91.12                                                                      | 204.1-204.12                                            |
| Acute myeloid leukemia          | C92.0-C92.02, C92.3-C92.62, C93.0-C93.02, C94.0-C94.02, C94.2-C94.22, C94.4-C94.5 | 205.0-205.02, 205.3-205.32, 206.0-206.02, 207.0         |
| Chronic myeloid leukemia        | C92.1-C92.12                                                                      | 205.1-205.12, 206.1-206.12, 207.1                       |
| Other leukemia                  | C91.2-C91.9, C92.2, C92.7-C92.9, C93.1-C93.9, C94.1, C94.3, C94.6-C95.9           | 204.2-204.9, 205.2, 205.8-205.9, 206.2-207, 207.2-208.9 |

| Cause           | ICD10                                                                                                                                                                                             | ICD9                                                                                                                                                                                                  |
|-----------------|---------------------------------------------------------------------------------------------------------------------------------------------------------------------------------------------------|-------------------------------------------------------------------------------------------------------------------------------------------------------------------------------------------------------|
| Other neoplasms | C17-C17.9, C30-C30.1, C31-C31.9, C37-C37.0, C38-C38.8, C40-C41.4, C41.8-C41.9, C47-C4A, C51-C52, C57-C57.8, C58-C58.0, C60-C60.9, C63-C63.8, C66-C66.9, C68.0-C68.8, C69-C69.92, C74-C75.5, C75.8 | 152-152.9, 158-158.9, 160-160.9, 163-164.9, 170-171.9, 181-181.9, 183.2-183.5, 184-184.9, 187-187.9, 189.2-189.4, 189.8-190.9, 192-192.9, 194-194.8, 209-209.03, 209.22, 209.25-209.27, 209.31-209.36 |

eTable 5: List of International Classification of Diseases (ICD) codes mapped to the Global Burden of Disease cause list for cancer mortality data

| Cause                                | ICD10                                          | ICD9                                              |
|--------------------------------------|------------------------------------------------|---------------------------------------------------|
| Lip and oral cavity cancer           | C00-C08.9, D10.0-D10.5, D11-D11.9              | 140-145.9, 210.0-210.6, 235.0                     |
| Nasopharynx cancer                   | C11-C11.9, D10.6                               | 147-147.9, 210.7-210.9                            |
| Other pharynx cancer                 | C09-C10.9, C12-C13.9, D10.7                    | 146-146.9, 148-148.9                              |
| Esophageal cancer                    | C15-C15.9, D00.1, D13.0                        | 150-150.9, 211.0, 230.1                           |
| Stomach cancer                       | C16-C16.9, D00.2, D13.1, D37.1                 | 151-151.9, 211.1, 230.2                           |
| Colon and rectum cancer              | C18-C21.9, D01.0-D01.3, D12-D12.9, D37.3-D37.5 | 153-154.9, 209.1, 209.5, 211.3-211.4, 230.3-230.6 |
| Liver cancer                         | C22-C22.9, D13.4                               | 155-155.9, 211.5                                  |
| Liver cancer due to hepatitis B      |                                                |                                                   |
| Liver cancer due to hepatitis C      |                                                |                                                   |
| Liver cancer due to alcohol use      |                                                |                                                   |
| Liver cancer due to other causes     |                                                |                                                   |
| Gallbladder and biliary tract cancer | C23-C24.9, D13.5                               | 156-156.9                                         |
| Pancreatic cancer                    | C25-C25.9, D13.6-D13.7                         | 157-157.9, 211.6-211.7                            |
| Larynx cancer                        | C32-C32.9, D02.0, D14.1, D38.0                 | 161-161.9, 212.1, 231.0, 235.6                    |
| Tracheal, bronchus, and lung cancer  | C33-C34.9, D02.1-D02.3, D14.2-D14.3, D38.1     | 162-162.9, 212.2-212.3, 231.1-231.2, 235.7        |
| Malignant skin melanoma              | C43-C43.9, D03-D03.9, D22-D23.9, D48.5         | 172-172.9                                         |

| <b>Cause</b>                                       | <b>ICD10</b>                                                            | <b>ICD9</b>                                             |
|----------------------------------------------------|-------------------------------------------------------------------------|---------------------------------------------------------|
| Non-melanoma skin cancer                           | C44-C44.9, D04-D04.9, D49.2                                             | 173-173.9, 222.4, 232-232.9, 238.2                      |
| Non-melanoma skin cancer (squamous-cell carcinoma) | C44-C44.9, D04-D04.9, D49.2                                             | 173-173.9, 222.4, 232-232.9, 238.2                      |
| Breast cancer                                      | C50-C50.9, D05-D05.9, D24-D24.9, D48.6, D49.3, N60-N60.9                | 174-175.9, 217-217.8, 233.0, 238.3, 239.3, 610-610.9    |
| Cervical cancer                                    | C53-C53.9, D06-D06.9, D26.0                                             | 180-180.9, 219.0, 233.1                                 |
| Uterine cancer                                     | C54-C54.9, D07.0-D07.2, N87-N87.9                                       | 182-182.8, 233.2                                        |
| Ovarian cancer                                     | C56-C56.9, D27-D27.9, D39.1                                             | 183-183.0, 220-220.9, 236.2                             |
| Prostate cancer                                    | C61-C61.9, D07.5, D29.1, D40.0                                          | 185-185.9, 222.2, 236.5                                 |
| Testicular cancer                                  | C62-C62.9, D29.2-D29.8, D40.1-D40.8                                     | 186-186.9, 222.0, 222.3, 236.4                          |
| Kidney cancer                                      | C64-C65.9, D30.0-D30.1, D41.0-D41.1                                     | 189.0-189.1, 189.5-189.6, 223.0-223.1                   |
| Bladder cancer                                     | C67-C67.9, D09.0, D30.3, D41.4-D41.8, D49.4                             | 188-188.9, 223.3, 233.7, 236.7, 239.4                   |
| Brain and nervous system cancer                    | C70-C72.9                                                               | 191-192.9                                               |
| Thyroid cancer                                     | C73-C73.9, D09.3, D09.8, D34-D34.9, D44.0                               | 193-193.9, 226-226.9                                    |
| Mesothelioma                                       | C45-C45.9                                                               |                                                         |
| Hodgkin lymphoma                                   | C81-C81.9                                                               | 201-201.9                                               |
| Non-Hodgkin lymphoma                               | C82-C86.6, C96-C96.9                                                    | 200-200.9, 202-202.9                                    |
| Multiple myeloma                                   | C88-C90.9                                                               | 203-203.9                                               |
| Leukemia                                           | C91-C95.9                                                               | 204-208.9                                               |
| Acute lymphoid leukemia                            | C91.0                                                                   | 204.0                                                   |
| Chronic lymphoid leukemia                          | C91.1                                                                   | 204.1                                                   |
| Acute myeloid leukemia                             | C92.0, C92.3-C92.6, C93.0, C94.0, C94.2, C94.4-C94.5                    | 205.0, 205.3, 206.0, 207.0                              |
| Chronic myeloid leukemia                           | C92.1                                                                   | 205.1, 206.1, 207.1                                     |
| Other leukemia                                     | C91.2-C91.9, C92.2, C92.7-C92.9, C93.1-C93.9, C94.1, C94.3, C94.6-C95.9 | 204.2-204.9, 205.2, 205.8-205.9, 206.2-207, 207.2-208.9 |

| Cause                                                                                                                                          | ICD10                                                                                                                                                                                                                                                                                                                                                                                                                                            | ICD9                                                                                                                                                                                                                                                                                                                                                                                                                                       |
|------------------------------------------------------------------------------------------------------------------------------------------------|--------------------------------------------------------------------------------------------------------------------------------------------------------------------------------------------------------------------------------------------------------------------------------------------------------------------------------------------------------------------------------------------------------------------------------------------------|--------------------------------------------------------------------------------------------------------------------------------------------------------------------------------------------------------------------------------------------------------------------------------------------------------------------------------------------------------------------------------------------------------------------------------------------|
| Other neoplasms                                                                                                                                | C17-C17.9, C30-C31.9, C37-C38.8, C40-C41.9, C47-C4A, C51-C52.9, C57-C57.8, C58-C58.0, C60-C60.9, C63-C63.8, C66-C66.9, C68.0-C68.8, C69-C69.9, C74-C75.8, D07.4, D09.2, D13.2-D13.3, D14.0, D15-D16.9, D28.0-D28.1, D28.7, D29.0, D30.2, D30.4-D30.8, D31-D33.9, D35-D36, D36.1-D36.7, D37.2, D38.2-D38.5, D39.2, D39.8, D41.2-D41.3, D42-D43.9, D44.1-D44.8, D45-D47.0, D47.2-D47.9, D48.0-D48.4, D49.6, K31.7, K62.0-K62.1, K63.5, N84.0-N84.1 | 152-152.9, 158-158.9, 160-160.9, 163-164.9, 170-171.9, 181-181.9, 182.9, 183.2-183.8, 184.0-184.4, 184.8, 187.1-187.8, 189.2-189.4, 189.8, 190-190.9, 194-194.8, 209.0, 209.4, 211.2, 211.8, 212.0, 212.4-212.8, 213-213.9, 221.0-221.8, 222.1, 222.8, 223.2, 223.8, 224-225.9, 227-228.9, 229.0, 229.8, 230.7-230.8, 233.4-233.5, 234.0-234.8, 235.4, 235.8, 236.1, 237-237.3, 237.5-237.9, 238.0-238.1, 238.4-238.9, 239.2, 239.6, 569.0 |
| ICD codes specifying benign neoplasms in the raw mortality data from vital registration systems were mapped to the respective malignant cause. |                                                                                                                                                                                                                                                                                                                                                                                                                                                  |                                                                                                                                                                                                                                                                                                                                                                                                                                            |

eTable 6: Undefined cancer code categories (ICD-10) and respective target codes for cancer registry incidence data

| Unspecified site cancer codes                                                         | Target codes for redistribution of these unspecified site cancer                                                             |
|---------------------------------------------------------------------------------------|------------------------------------------------------------------------------------------------------------------------------|
| C14,C14.0-C14.3,C14.8                                                                 | C00-C13.99                                                                                                                   |
| C26,C26.0,C26.1,C26.8,C26.9                                                           | C15.00-C25.99                                                                                                                |
| C39,C39.0,C39.8,C39.9                                                                 | C30.00-C38.99, C45.00-C45.99                                                                                                 |
| C55,C55.1,C55.9                                                                       | C53.00-C54.99                                                                                                                |
| C57.9                                                                                 | C51.00-C54.99, C56.00-C58.99                                                                                                 |
| C68.9                                                                                 | C64.00-C68.89                                                                                                                |
| C63.9                                                                                 | C60.00-C63.89                                                                                                                |
| C75.9                                                                                 | C73.00-C75.89                                                                                                                |
| C76,C76.4,C76.5,C76.8,C77,C77.3-C77.5,C77.8,C77.9,C78,C79,C79.2-C79.9,C80,C80.0,C80.2 | C00-C99 (Except any unspecified site cancer codes)                                                                           |
| C76.0,C76.1,C77.0,C77.1,C78.0-C78.3                                                   | C00-C13.99 ,C15, C30-C34.99,C37-C38.99, C40-C42.99, C43-C50.99, C69-C73.9                                                    |
| C76.2,C76.3,C77.2,C7.5,C78.4-C78.8,C79.0,C79.1                                        | C15.00-C25.99, C45.00-C45.99, C48.00-C54.99, C56.00-C58.99 , C61, C63.00-C63.89, C64.00-C68.99, C74.00-C75.89, C81.00-C88.99 |

eTable 7: Sociodemographic Index groupings by geography, based on 2016 values

| Location       | SDI quintile |
|----------------|--------------|
| Andorra        | High SDI     |
| Australia      | High SDI     |
| Austria        | High SDI     |
| Belgium        | High SDI     |
| Brunei         | High SDI     |
| Canada         | High SDI     |
| Croatia        | High SDI     |
| Cyprus         | High SDI     |
| Czech Republic | High SDI     |
| Denmark        | High SDI     |
| Estonia        | High SDI     |
| Finland        | High SDI     |
| France         | High SDI     |
| Georgia        | High SDI     |
| Germany        | High SDI     |
| Greece         | High SDI     |

|                      |                 |
|----------------------|-----------------|
| Iceland              | High SDI        |
| Ireland              | High SDI        |
| Italy                | High SDI        |
| Japan                | High SDI        |
| Latvia               | High SDI        |
| Lithuania            | High SDI        |
| Luxembourg           | High SDI        |
| Malta                | High SDI        |
| Netherlands          | High SDI        |
| New Zealand          | High SDI        |
| Norway               | High SDI        |
| Poland               | High SDI        |
| Puerto Rico          | High SDI        |
| Singapore            | High SDI        |
| Slovakia             | High SDI        |
| Slovenia             | High SDI        |
| South Korea          | High SDI        |
| Sweden               | High SDI        |
| Switzerland          | High SDI        |
| Taiwan               | High SDI        |
| United Kingdom       | High SDI        |
| United States        | High SDI        |
| Virgin Islands, U.S. | High SDI        |
| Antigua and Barbuda  | High-middle SDI |
| Argentina            | High-middle SDI |
| Armenia              | High-middle SDI |
| Azerbaijan           | High-middle SDI |
| Barbados             | High-middle SDI |
| Belarus              | High-middle SDI |
| Bermuda              | High-middle SDI |
| Bulgaria             | High-middle SDI |
| Chile                | High-middle SDI |
| Cuba                 | High-middle SDI |
| Georgia              | High-middle SDI |
| Greenland            | High-middle SDI |
| Guam                 | High-middle SDI |
| Hungary              | High-middle SDI |
| Iran                 | High-middle SDI |
| Israel               | High-middle SDI |
| Kazakhstan           | High-middle SDI |
| Kuwait               | High-middle SDI |

|                          |                 |
|--------------------------|-----------------|
| Lebanon                  | High-middle SDI |
| Libya                    | High-middle SDI |
| Macedonia                | High-middle SDI |
| Malaysia                 | High-middle SDI |
| Mauritius                | High-middle SDI |
| Montenegro               | High-middle SDI |
| Northern Mariana Islands | High-middle SDI |
| Panama                   | High-middle SDI |
| Portugal                 | High-middle SDI |
| Qatar                    | High-middle SDI |
| Romania                  | High-middle SDI |
| Russia                   | High-middle SDI |
| Saudi Arabia             | High-middle SDI |
| Serbia                   | High-middle SDI |
| Spain                    | High-middle SDI |
| The Bahamas              | High-middle SDI |
| Trinidad and Tobago      | High-middle SDI |
| Turkey                   | High-middle SDI |
| Turkmenistan             | High-middle SDI |
| Ukraine                  | High-middle SDI |
| United Arab Emirates     | High-middle SDI |
| Albania                  | Middle SDI      |
| Algeria                  | Middle SDI      |
| American Samoa           | Middle SDI      |
| Bahrain                  | Middle SDI      |
| Bosnia and Herzegovina   | Middle SDI      |
| Botswana                 | Middle SDI      |
| Brazil                   | Middle SDI      |
| China                    | Middle SDI      |
| Colombia                 | Middle SDI      |
| Costa Rica               | Middle SDI      |
| Dominica                 | Middle SDI      |
| Dominican Republic       | Middle SDI      |
| Ecuador                  | Middle SDI      |
| Egypt                    | Middle SDI      |
| El Salvador              | Middle SDI      |
| Equatorial Guinea        | Middle SDI      |



|                                     |                |
|-------------------------------------|----------------|
| Fiji                                | Middle SDI     |
| Grenada                             | Middle SDI     |
| Guyana                              | Middle SDI     |
| Indonesia                           | Middle SDI     |
| Jamaica                             | Middle SDI     |
| Jordan                              | Middle SDI     |
| Maldives                            | Middle SDI     |
| Mexico                              | Middle SDI     |
| Moldova                             | Middle SDI     |
| Mongolia                            | Middle SDI     |
| Oman                                | Middle SDI     |
| Paraguay                            | Middle SDI     |
| Peru                                | Middle SDI     |
| Philippines                         | Middle SDI     |
| Saint Lucia                         | Middle SDI     |
| Saint Vincent and<br>the Grenadines | Middle SDI     |
| Seychelles                          | Middle SDI     |
| South Africa                        | Middle SDI     |
| Sri Lanka                           | Middle SDI     |
| Suriname                            | Middle SDI     |
| Thailand                            | Middle SDI     |
| Tunisia                             | Middle SDI     |
| Uruguay                             | Middle SDI     |
| Uzbekistan                          | Middle SDI     |
| Venezuela                           | Middle SDI     |
| Vietnam                             | Middle SDI     |
| Bangladesh                          | Low-middle SDI |
| Belize                              | Low-middle SDI |
| Bhutan                              | Low-middle SDI |
| Bolivia                             | Low-middle SDI |
| Cambodia                            | Low-middle SDI |
| Cameroon                            | Low-middle SDI |
| Cape Verde                          | Low-middle SDI |
| Congo                               | Low-middle SDI |
| Federated States<br>of Micronesia   | Low-middle SDI |
| Gabon                               | Low-middle SDI |
| Ghana                               | Low-middle SDI |
| Guatemala                           | Low-middle SDI |
| Honduras                            | Low-middle SDI |
| India                               | Low-middle SDI |

|                                  |                |
|----------------------------------|----------------|
| Iraq                             | Low-middle SDI |
| Kenya                            | Low-middle SDI |
| Kyrgyzstan                       | Low-middle SDI |
| Laos                             | Low-middle SDI |
| Lesotho                          | Low-middle SDI |
| Marshall Islands                 | Low-middle SDI |
| Mauritania                       | Low-middle SDI |
| Morocco                          | Low-middle SDI |
| Myanmar                          | Low-middle SDI |
| Namibia                          | Low-middle SDI |
| Nepal                            | Low-middle SDI |
| Nicaragua                        | Low-middle SDI |
| Nigeria                          | Low-middle SDI |
| North Korea                      | Low-middle SDI |
| Pakistan                         | Low-middle SDI |
| Samoa                            | Low-middle SDI |
| Sudan                            | Low-middle SDI |
| Swaziland                        | Low-middle SDI |
| Syria                            | Low-middle SDI |
| Tajikistan                       | Low-middle SDI |
| Timor-Leste                      | Low-middle SDI |
| Tonga                            | Low-middle SDI |
| Vanuatu                          | Low-middle SDI |
| Zambia                           | Low-middle SDI |
| Zimbabwe                         | Low-middle SDI |
| Afghanistan                      | Low SDI        |
| Angola                           | Low SDI        |
| Benin                            | Low SDI        |
| Burkina Faso                     | Low SDI        |
| Burundi                          | Low SDI        |
| Central African Republic         | Low SDI        |
| Chad                             | Low SDI        |
| Comoros                          | Low SDI        |
| Cote d'Ivoire                    | Low SDI        |
| Democratic Republic of the Congo | Low SDI        |
| Djibouti                         | Low SDI        |
| Eritrea                          | Low SDI        |
| Ethiopia                         | Low SDI        |
| Guinea                           | Low SDI        |

|                       |         |
|-----------------------|---------|
| Guinea-Bissau         | Low SDI |
| Haiti                 | Low SDI |
| Kiribati              | Low SDI |
| Liberia               | Low SDI |
| Madagascar            | Low SDI |
| Malawi                | Low SDI |
| Mali                  | Low SDI |
| Mozambique            | Low SDI |
| Niger                 | Low SDI |
| Palestine             | Low SDI |
| Papua New Guinea      | Low SDI |
| Rwanda                | Low SDI |
| Sao Tome and Principe | Low SDI |
| Senegal               | Low SDI |
| Sierra Leone          | Low SDI |
| Solomon Islands       | Low SDI |
| Somalia               | Low SDI |
| South Sudan           | Low SDI |
| Tanzania              | Low SDI |
| The Gambia            | Low SDI |
| Togo                  | Low SDI |
| Uganda                | Low SDI |
| Yemen                 | Low SDI |

eTable 8: Covariates selected for CODEm for each GBD cancer group and expected direction of covariate

| Cause             | Sex    | Age start   | Age end   | Direction | Covariate                                              |
|-------------------|--------|-------------|-----------|-----------|--------------------------------------------------------|
| Esophageal cancer | Male   | 15-19 years | 95+ years | 1         | Tobacco (cigarettes per capita)                        |
| Esophageal cancer | Male   | 15-19 years | 95+ years | -1        | Education (years per capita)                           |
| Esophageal cancer | Male   | 15-19 years | 95+ years | -1        | Fruits (kcal per capita)                               |
| Esophageal cancer | Male   | 15-19 years | 95+ years | -1        | LDI (I\$ per capita)                                   |
| Esophageal cancer | Male   | 15-19 years | 95+ years | 1         | Mean BMI                                               |
| Esophageal cancer | Male   | 15-19 years | 95+ years | 1         | Indoor Air Pollution (All Cooking Fuels)               |
| Esophageal cancer | Male   | 15-19 years | 95+ years | -1        | Sanitation (proportion with access)                    |
| Esophageal cancer | Male   | 15-19 years | 95+ years | 1         | Smoking Prevalence                                     |
| Esophageal cancer | Male   | 15-19 years | 95+ years | -1        | Vegetables (kcal per capita)                           |
| Esophageal cancer | Male   | 15-19 years | 95+ years | -1        | Improved Water Source (proportion with access)         |
| Esophageal cancer | Male   | 15-19 years | 95+ years | 1         | Log-transformed age-standardized SEV scalar: Esophag C |
| Esophageal cancer | Male   | 15-19 years | 95+ years | -1        | Socio-demographic Index                                |
| Esophageal cancer | Male   | 15-19 years | 95+ years | -1        | Healthcare access and quality index                    |
| Esophageal cancer | Female | 15-19 years | 95+ years | 1         | Alcohol (liters per capita)                            |
| Esophageal cancer | Female | 15-19 years | 95+ years | 1         | Tobacco (cigarettes per capita)                        |
| Esophageal cancer | Female | 15-19 years | 95+ years | -1        | Education (years per capita)                           |
| Esophageal cancer | Female | 15-19 years | 95+ years | -1        | Fruits (kcal per capita)                               |
| Esophageal cancer | Female | 15-19 years | 95+ years | -1        | LDI (I\$ per capita)                                   |
| Esophageal cancer | Female | 15-19 years | 95+ years | 1         | Mean BMI                                               |
| Esophageal cancer | Female | 15-19 years | 95+ years | 1         | Indoor Air Pollution (All Cooking Fuels)               |
| Esophageal cancer | Female | 15-19 years | 95+ years | -1        | Sanitation (proportion with access)                    |
| Esophageal cancer | Female | 15-19 years | 95+ years | 1         | Smoking Prevalence                                     |
| Esophageal cancer | Female | 15-19 years | 95+ years | -1        | Vegetables (kcal per capita)                           |
| Esophageal cancer | Female | 15-19 years | 95+ years | -1        | Improved Water Source (proportion with access)         |
| Esophageal cancer | Female | 15-19 years | 95+ years | 1         | Log-transformed age-standardized SEV scalar: Esophag C |
| Esophageal cancer | Female | 15-19 years | 95+ years | 0         | Socio-demographic Index                                |
| Esophageal cancer | Female | 15-19 years | 95+ years | -1        | Healthcare access and quality index                    |
| Esophageal cancer | Female | 15-19 years | 95+ years | 0         | LDI (I\$ per capita)                                   |
| Esophageal cancer | Female | 15-19 years | 95+ years | -1        | Socio-demographic Index                                |

| Cause             | Sex    | Age start   | Age end   | Direction | Covariate                                      |
|-------------------|--------|-------------|-----------|-----------|------------------------------------------------|
| Esophageal cancer | Female | 15-19 years | 95+ years | -1        | fruits adjusted(g)                             |
| Esophageal cancer | Female | 15-19 years | 95+ years | -1        | vegetables adjusted(g)                         |
| Esophageal cancer | Male   | 15-19 years | 95+ years | 0         | LDI (I\$ per capita)                           |
| Esophageal cancer | Male   | 15-19 years | 95+ years | 1         | Log-transformed SEV scalar: Esophag C          |
| Esophageal cancer | Male   | 15-19 years | 95+ years | -1        | fruits adjusted(g)                             |
| Esophageal cancer | Male   | 15-19 years | 95+ years | -1        | vegetables adjusted(g)                         |
| Stomach cancer    | Male   | 15-19 years | 95+ years | 1         | Alcohol (liters per capita)                    |
| Stomach cancer    | Male   | 15-19 years | 95+ years | 1         | Tobacco (cigarettes per capita)                |
| Stomach cancer    | Male   | 15-19 years | 95+ years | 1         | Cumulative Cigarettes (10 Years)               |
| Stomach cancer    | Male   | 15-19 years | 95+ years | 1         | Cumulative Cigarettes (15 Years)               |
| Stomach cancer    | Male   | 15-19 years | 95+ years | 0         | LDI (I\$ per capita)                           |
| Stomach cancer    | Male   | 15-19 years | 95+ years | 1         | Mean BMI                                       |
| Stomach cancer    | Male   | 15-19 years | 95+ years | 1         | Indoor Air Pollution (All Cooking Fuels)       |
| Stomach cancer    | Male   | 15-19 years | 95+ years | 1         | Outdoor Air Pollution (PM2.5)                  |
| Stomach cancer    | Male   | 15-19 years | 95+ years | -1        | Sanitation (proportion with access)            |
| Stomach cancer    | Male   | 15-19 years | 95+ years | 1         | Smoking Prevalence                             |
| Stomach cancer    | Male   | 15-19 years | 95+ years | -1        | Improved Water Source (proportion with access) |
| Stomach cancer    | Male   | 15-19 years | 95+ years | 1         | Log-transformed SEV scalar: Stomach C          |
| Stomach cancer    | Male   | 15-19 years | 95+ years | 0         | Socio-demographic Index                        |
| Stomach cancer    | Male   | 15-19 years | 95+ years | -1        | fruits adjusted (g)                            |
| Stomach cancer    | Male   | 15-19 years | 95+ years | -1        | vegetables adjusted (g)                        |
| Stomach cancer    | Male   | 15-19 years | 95+ years | -1        | Healthcare access and quality index            |
| Stomach cancer    | Male   | 15-19 years | 95+ years | 1         | Diet high in sodium                            |
| Stomach cancer    | Female | 15-19 years | 95+ years | 1         | Alcohol (liters per capita)                    |
| Stomach cancer    | Female | 15-19 years | 95+ years | 1         | Tobacco (cigarettes per capita)                |
| Stomach cancer    | Female | 15-19 years | 95+ years | 1         | Cumulative Cigarettes (10 Years)               |
| Stomach cancer    | Female | 15-19 years | 95+ years | -1        | Education (years per capita)                   |
| Stomach cancer    | Female | 15-19 years | 95+ years | 0         | LDI (I\$ per capita)                           |
| Stomach cancer    | Female | 15-19 years | 95+ years | 1         | Mean BMI                                       |
| Stomach cancer    | Female | 15-19 years | 95+ years | 1         | Indoor Air Pollution (All Cooking Fuels)       |

| Cause          | Sex    | Age start   | Age end   | Direction | Covariate                                           |
|----------------|--------|-------------|-----------|-----------|-----------------------------------------------------|
| Stomach cancer | Female | 15-19 years | 95+ years | 1         | Outdoor Air Pollution (PM2.5)                       |
| Stomach cancer | Female | 15-19 years | 95+ years | -1        | Sanitation (proportion with access)                 |
| Stomach cancer | Female | 15-19 years | 95+ years | 1         | Smoking Prevalence                                  |
| Stomach cancer | Female | 15-19 years | 95+ years | -1        | Improved Water Source (proportion with access)      |
| Stomach cancer | Female | 15-19 years | 95+ years | 1         | Log-transformed SEV scalar: Stomach C               |
| Stomach cancer | Female | 15-19 years | 95+ years | 0         | Socio-demographic Index                             |
| Stomach cancer | Female | 15-19 years | 95+ years | -1        | fruits adjusted (g)                                 |
| Stomach cancer | Female | 15-19 years | 95+ years | -1        | vegetables adjusted (g)                             |
| Stomach cancer | Female | 15-19 years | 95+ years | -1        | Healthcare access and quality index                 |
| Stomach cancer | Female | 15-19 years | 95+ years | 1         | Diet high in sodium                                 |
| Liver cancer   | Male   | 5-9 years   | 95+ years | 1         | Alcohol (liters per capita)                         |
| Liver cancer   | Male   | 5-9 years   | 95+ years | 1         | Tobacco (cigarettes per capita)                     |
| Liver cancer   | Male   | 5-9 years   | 95+ years | 1         | Cumulative Cigarettes (15 Years)                    |
| Liver cancer   | Male   | 5-9 years   | 95+ years | 1         | Cumulative Cigarettes (20 Years)                    |
| Liver cancer   | Male   | 5-9 years   | 95+ years | 1         | Diabetes Age-Standardized Prevalence (proportion)   |
| Liver cancer   | Male   | 5-9 years   | 95+ years | -1        | Education (years per capita)                        |
| Liver cancer   | Male   | 5-9 years   | 95+ years | 0         | LDI (I\$ per capita)                                |
| Liver cancer   | Male   | 5-9 years   | 95+ years | 1         | Mean BMI                                            |
| Liver cancer   | Male   | 5-9 years   | 95+ years | 1         | Percent of total calories consumed as saturated fat |
| Liver cancer   | Male   | 5-9 years   | 95+ years | 1         | Log-transformed SEV scalar: Liver C                 |
| Liver cancer   | Male   | 5-9 years   | 95+ years | 0         | Socio-demographic Index                             |
| Liver cancer   | Male   | 5-9 years   | 95+ years | 1         | red meats adjusted (g)                              |
| Liver cancer   | Male   | 5-9 years   | 95+ years | 1         | Hepatitis B (HBsAg) Seroprevalence                  |
| Liver cancer   | Male   | 5-9 years   | 95+ years | 1         | Hepatitis C (IgG) Seroprevalence                    |
| Liver cancer   | Male   | 5-9 years   | 95+ years | -1        | Healthcare access and quality index                 |
| Liver cancer   | Female | 5-9 years   | 95+ years | 1         | Alcohol (liters per capita)                         |
| Liver cancer   | Female | 5-9 years   | 95+ years | 1         | Tobacco (cigarettes per capita)                     |
| Liver cancer   | Female | 5-9 years   | 95+ years | 1         | Cumulative Cigarettes (15 Years)                    |
| Liver cancer   | Female | 5-9 years   | 95+ years | 1         | Cumulative Cigarettes (20 Years)                    |
| Liver cancer   | Female | 5-9 years   | 95+ years | 1         | Diabetes Age-Standardized Prevalence (proportion)   |

| Cause         | Sex    | Age start   | Age end   | Direction | Covariate                                           |
|---------------|--------|-------------|-----------|-----------|-----------------------------------------------------|
| Liver cancer  | Female | 5-9 years   | 95+ years | -1        | Education (years per capita)                        |
| Liver cancer  | Female | 5-9 years   | 95+ years | 0         | LDI (I\$ per capita)                                |
| Liver cancer  | Female | 5-9 years   | 95+ years | 1         | Mean BMI                                            |
| Liver cancer  | Female | 5-9 years   | 95+ years | 1         | Percent of total calories consumed as saturated fat |
| Liver cancer  | Female | 5-9 years   | 95+ years | 1         | Log-transformed SEV scalar: Liver C                 |
| Liver cancer  | Female | 5-9 years   | 95+ years | 0         | Socio-demographic Index                             |
| Liver cancer  | Female | 5-9 years   | 95+ years | 1         | red meats adjusted (g)                              |
| Liver cancer  | Female | 5-9 years   | 95+ years | 1         | Hepatitis B (HBsAg) Seroprevalence                  |
| Liver cancer  | Female | 5-9 years   | 95+ years | 1         | Hepatitis C (IgG) Seroprevalence                    |
| Liver cancer  | Female | 5-9 years   | 95+ years | -1        | Healthcare access and quality index                 |
| Larynx cancer | Male   | 15-19 years | 95+ years | 1         | Alcohol (liters per capita)                         |
| Larynx cancer | Male   | 15-19 years | 95+ years | 1         | Tobacco (cigarettes per capita)                     |
| Larynx cancer | Male   | 15-19 years | 95+ years | 1         | Cumulative Cigarettes (10 Years)                    |
| Larynx cancer | Male   | 15-19 years | 95+ years | 1         | Cumulative Cigarettes (15 Years)                    |
| Larynx cancer | Male   | 15-19 years | 95+ years | 1         | Cumulative Cigarettes (20 Years)                    |
| Larynx cancer | Male   | 15-19 years | 95+ years | 1         | Cumulative Cigarettes (5 Years)                     |
| Larynx cancer | Male   | 15-19 years | 95+ years | -1        | Education (years per capita)                        |
| Larynx cancer | Male   | 15-19 years | 95+ years | 0         | LDI (I\$ per capita)                                |
| Larynx cancer | Male   | 15-19 years | 95+ years | 1         | Population Density (over 1000 ppl/sqkm, proportion) |
| Larynx cancer | Male   | 15-19 years | 95+ years | 1         | Population Density (under 150 ppl/sqkm, proportion) |
| Larynx cancer | Male   | 15-19 years | 95+ years | 1         | Smoking Prevalence                                  |
| Larynx cancer | Male   | 15-19 years | 95+ years | 1         | Log-transformed SEV scalar: Larynx C                |
| Larynx cancer | Male   | 15-19 years | 95+ years | 0         | Socio-demographic Index                             |
| Larynx cancer | Male   | 15-19 years | 95+ years | -1        | fruits adjusted (g)                                 |
| Larynx cancer | Male   | 15-19 years | 95+ years | -1        | vegetables adjusted (g)                             |
| Larynx cancer | Male   | 15-19 years | 95+ years | -1        | Healthcare access and quality index                 |
| Larynx cancer | Female | 15-19 years | 95+ years | 1         | Alcohol (liters per capita)                         |
| Larynx cancer | Female | 15-19 years | 95+ years | 1         | Tobacco (cigarettes per capita)                     |
| Larynx cancer | Female | 15-19 years | 95+ years | 1         | Cumulative Cigarettes (10 Years)                    |
| Larynx cancer | Female | 15-19 years | 95+ years | 1         | Cumulative Cigarettes (15 Years)                    |

| Cause                               | Sex    | Age start   | Age end   | Direction | Covariate                                           |
|-------------------------------------|--------|-------------|-----------|-----------|-----------------------------------------------------|
| Larynx cancer                       | Female | 15-19 years | 95+ years | 1         | Cumulative Cigarettes (20 Years)                    |
| Larynx cancer                       | Female | 15-19 years | 95+ years | 1         | Cumulative Cigarettes (5 Years)                     |
| Larynx cancer                       | Female | 15-19 years | 95+ years | -1        | Education (years per capita)                        |
| Larynx cancer                       | Female | 15-19 years | 95+ years | 0         | LDI (I\$ per capita)                                |
| Larynx cancer                       | Female | 15-19 years | 95+ years | 1         | Population Density (over 1000 ppl/sqkm, proportion) |
| Larynx cancer                       | Female | 15-19 years | 95+ years | 1         | Population Density (under 150 ppl/sqkm, proportion) |
| Larynx cancer                       | Female | 15-19 years | 95+ years | 1         | Smoking Prevalence                                  |
| Larynx cancer                       | Female | 15-19 years | 95+ years | 1         | Log-transformed SEV scalar: Larynx C                |
| Larynx cancer                       | Female | 15-19 years | 95+ years | 0         | Socio-demographic Index                             |
| Larynx cancer                       | Female | 15-19 years | 95+ years | -1        | fruits adjusted (g)                                 |
| Larynx cancer                       | Female | 15-19 years | 95+ years | -1        | vegetables adjusted (g)                             |
| Larynx cancer                       | Female | 15-19 years | 95+ years | -1        | Healthcare access and quality index                 |
| Tracheal, bronchus, and lung cancer | Female | 15-19 years | 95+ years | 1         | Tobacco (cigarettes per capita)                     |
| Tracheal, bronchus, and lung cancer | Female | 15-19 years | 95+ years | 1         | Cumulative Cigarettes (10 Years)                    |
| Tracheal, bronchus, and lung cancer | Female | 15-19 years | 95+ years | 1         | Cumulative Cigarettes (15 Years)                    |
| Tracheal, bronchus, and lung cancer | Female | 15-19 years | 95+ years | 1         | Cumulative Cigarettes (20 Years)                    |
| Tracheal, bronchus, and lung cancer | Female | 15-19 years | 95+ years | 1         | Cumulative Cigarettes (5 Years)                     |
| Tracheal, bronchus, and lung cancer | Female | 15-19 years | 95+ years | 0         | Education (years per capita)                        |
| Tracheal, bronchus, and lung cancer | Female | 15-19 years | 95+ years | 0         | LDI (I\$ per capita)                                |
| Tracheal, bronchus, and lung cancer | Female | 15-19 years | 95+ years | 1         | Indoor Air Pollution (All Cooking Fuels)            |
| Tracheal, bronchus, and lung cancer | Female | 15-19 years | 95+ years | 1         | Outdoor Air Pollution (PM2.5)                       |
| Tracheal, bronchus, and lung cancer | Female | 15-19 years | 95+ years | 1         | Smoking Prevalence                                  |
| Tracheal, bronchus, and lung cancer | Female | 15-19 years | 95+ years | 1         | Log-transformed SEV scalar: Lung C                  |
| Tracheal, bronchus, and lung cancer | Female | 15-19 years | 95+ years | 1         | Log-transformed age-standardized SEV scalar: Lung C |
| Tracheal, bronchus, and lung cancer | Female | 15-19 years | 95+ years | 0         | Socio-demographic Index                             |
| Tracheal, bronchus, and lung cancer | Female | 15-19 years | 95+ years | -1        | Healthcare access and quality index                 |
| Tracheal, bronchus, and lung cancer | Male   | 15-19 years | 95+ years | 1         | Tobacco (cigarettes per capita)                     |
| Tracheal, bronchus, and lung cancer | Male   | 15-19 years | 95+ years | 1         | Cumulative Cigarettes (10 Years)                    |
| Tracheal, bronchus, and lung cancer | Male   | 15-19 years | 95+ years | 1         | Cumulative Cigarettes (15 Years)                    |
| Tracheal, bronchus, and lung cancer | Male   | 15-19 years | 95+ years | 1         | Cumulative Cigarettes (20 Years)                    |



| Cause                               | Sex    | Age start   | Age end   | Direction | Covariate                                           |
|-------------------------------------|--------|-------------|-----------|-----------|-----------------------------------------------------|
| Tracheal, bronchus, and lung cancer | Male   | 15-19 years | 95+ years | 1         | Cumulative Cigarettes (5 Years)                     |
| Tracheal, bronchus, and lung cancer | Male   | 15-19 years | 95+ years | 0         | Education (years per capita)                        |
| Tracheal, bronchus, and lung cancer | Male   | 15-19 years | 95+ years | 0         | LDI (I\$ per capita)                                |
| Tracheal, bronchus, and lung cancer | Male   | 15-19 years | 95+ years | 1         | Indoor Air Pollution (All Cooking Fuels)            |
| Tracheal, bronchus, and lung cancer | Male   | 15-19 years | 95+ years | 1         | Outdoor Air Pollution (PM2.5)                       |
| Tracheal, bronchus, and lung cancer | Male   | 15-19 years | 95+ years | 1         | Smoking Prevalence                                  |
| Tracheal, bronchus, and lung cancer | Male   | 15-19 years | 95+ years | 1         | Log-transformed SEV scalar: Lung C                  |
| Tracheal, bronchus, and lung cancer | Male   | 15-19 years | 95+ years | 1         | Log-transformed age-standardized SEV scalar: Lung C |
| Tracheal, bronchus, and lung cancer | Male   | 15-19 years | 95+ years | 0         | Socio-demographic Index                             |
| Tracheal, bronchus, and lung cancer | Male   | 15-19 years | 95+ years | -1        | Healthcare access and quality index                 |
| Breast cancer                       | Male   | 15-19 years | 95+ years | 1         | Alcohol (liters per capita)                         |
| Breast cancer                       | Male   | 15-19 years | 95+ years | 1         | Cumulative Cigarettes (10 Years)                    |
| Breast cancer                       | Male   | 15-19 years | 95+ years | -1        | Education (years per capita)                        |
| Breast cancer                       | Male   | 15-19 years | 95+ years | 1         | Saturated Fats (kcal per capita)                    |
| Breast cancer                       | Male   | 15-19 years | 95+ years | 0         | LDI (I\$ per capita)                                |
| Breast cancer                       | Male   | 15-19 years | 95+ years | 1         | Mean BMI                                            |
| Breast cancer                       | Male   | 15-19 years | 95+ years | 1         | Log-transformed SEV scalar: Breast C                |
| Breast cancer                       | Male   | 15-19 years | 95+ years | 0         | Socio-demographic Index                             |
| Breast cancer                       | Male   | 15-19 years | 95+ years | -1        | fruits adjusted (g)                                 |
| Breast cancer                       | Male   | 15-19 years | 95+ years | -1        | vegetables adjusted (g)                             |
| Breast cancer                       | Male   | 15-19 years | 95+ years | -1        | Healthcare access and quality index                 |
| Breast cancer                       | Female | 15-19 years | 95+ years | 1         | Alcohol (liters per capita)                         |
| Breast cancer                       | Female | 15-19 years | 95+ years | -1        | Age-Specific Fertility Rate                         |
| Breast cancer                       | Female | 15-19 years | 95+ years | 1         | Cumulative Cigarettes (10 Years)                    |
| Breast cancer                       | Female | 15-19 years | 95+ years | -1        | Education (years per capita)                        |
| Breast cancer                       | Female | 15-19 years | 95+ years | 1         | Saturated Fats (kcal per capita)                    |
| Breast cancer                       | Female | 15-19 years | 95+ years | 0         | LDI (I\$ per capita)                                |
| Breast cancer                       | Female | 15-19 years | 95+ years | 1         | Mean BMI                                            |
| Breast cancer                       | Female | 15-19 years | 95+ years | -1        | Total Fertility Rate                                |
| Breast cancer                       | Female | 15-19 years | 95+ years | 1         | Log-transformed SEV scalar: Breast C                |

| Cause           | Sex    | Age start   | Age end   | Direction | Covariate                                         |
|-----------------|--------|-------------|-----------|-----------|---------------------------------------------------|
| Breast cancer   | Female | 15-19 years | 95+ years | 0         | Socio-demographic Index                           |
| Breast cancer   | Female | 15-19 years | 95+ years | -1        | fruits adjusted (g)                               |
| Breast cancer   | Female | 15-19 years | 95+ years | -1        | vegetables adjusted (g)                           |
| Breast cancer   | Female | 15-19 years | 95+ years | -1        | Healthcare access and quality index               |
| Cervical cancer | Female | 15-19 years | 95+ years | 1         | Abortion On-Demand Illegal (binary)               |
| Cervical cancer | Female | 15-19 years | 95+ years | 1         | Age-Specific Fertility Rate                       |
| Cervical cancer | Female | 15-19 years | 95+ years | 1         | Cumulative Cigarettes (10 Years)                  |
| Cervical cancer | Female | 15-19 years | 95+ years | 1         | Cumulative Cigarettes (15 Years)                  |
| Cervical cancer | Female | 15-19 years | 95+ years | 1         | Cumulative Cigarettes (5 Years)                   |
| Cervical cancer | Female | 15-19 years | 95+ years | -1        | Education (years per capita)                      |
| Cervical cancer | Female | 15-19 years | 95+ years | -1        | Health System Access 2 (unitless)                 |
| Cervical cancer | Female | 15-19 years | 95+ years | 0         | LDI (I\$ per capita)                              |
| Cervical cancer | Female | 15-19 years | 95+ years | 1         | Smoking Prevalence                                |
| Cervical cancer | Female | 15-19 years | 95+ years | 1         | Total Fertility Rate                              |
| Cervical cancer | Female | 15-19 years | 95+ years | 0         | Socio-demographic Index                           |
| Cervical cancer | Female | 15-19 years | 95+ years | -1        | fruits adjusted (g)                               |
| Cervical cancer | Female | 15-19 years | 95+ years | -1        | vegetables adjusted (g)                           |
| Cervical cancer | Female | 15-19 years | 95+ years | 1         | HIV age-standardized prevalence                   |
| Cervical cancer | Female | 15-19 years | 95+ years | -1        | Healthcare access and quality index               |
| Uterine cancer  | Female | 15-19 years | 95+ years | 1         | Tobacco (cigarettes per capita)                   |
| Uterine cancer  | Female | 15-19 years | 95+ years | 1         | Cumulative Cigarettes (10 Years)                  |
| Uterine cancer  | Female | 15-19 years | 95+ years | 1         | Cumulative Cigarettes (5 Years)                   |
| Uterine cancer  | Female | 15-19 years | 95+ years | 1         | Diabetes Age-Standardized Prevalence (proportion) |
| Uterine cancer  | Female | 15-19 years | 95+ years | -1        | Education (years per capita)                      |
| Uterine cancer  | Female | 15-19 years | 95+ years | -1        | Health System Access (unitless)                   |
| Uterine cancer  | Female | 15-19 years | 95+ years | 0         | LDI (I\$ per capita)                              |
| Uterine cancer  | Female | 15-19 years | 95+ years | 1         | Mean BMI                                          |
| Uterine cancer  | Female | 15-19 years | 95+ years | 1         | Smoking Prevalence                                |
| Uterine cancer  | Female | 15-19 years | 95+ years | 0         | Total Fertility Rate                              |
| Uterine cancer  | Female | 15-19 years | 95+ years | 1         | Log-transformed SEV scalar: Uterus C              |

| Cause                   | Sex    | Age start   | Age end   | Direction | Covariate                                           |
|-------------------------|--------|-------------|-----------|-----------|-----------------------------------------------------|
| Uterine cancer          | Female | 15-19 years | 95+ years | 0         | Socio-demographic Index                             |
| Uterine cancer          | Female | 15-19 years | 95+ years | -1        | fruits adjusted (g)                                 |
| Uterine cancer          | Female | 15-19 years | 95+ years | -1        | vegetables adjusted (g)                             |
| Uterine cancer          | Female | 15-19 years | 95+ years | -1        | Healthcare access and quality index                 |
| Prostate cancer         | Male   | 15-19 years | 95+ years | 0         | Education (years per capita)                        |
| Prostate cancer         | Male   | 15-19 years | 95+ years | 0         | LDI (I\$ per capita)                                |
| Prostate cancer         | Male   | 15-19 years | 95+ years | 1         | Percent of total calories consumed as saturated fat |
| Prostate cancer         | Male   | 15-19 years | 95+ years | 1         | Log-transformed SEV scalar: Prostate C              |
| Prostate cancer         | Male   | 15-19 years | 95+ years | 0         | Socio-demographic Index                             |
| Prostate cancer         | Male   | 15-19 years | 95+ years | -1        | Healthcare access and quality index                 |
| Colon and rectum cancer | Male   | 15-19 years | 95+ years | 1         | Alcohol (liters per capita)                         |
| Colon and rectum cancer | Male   | 15-19 years | 95+ years | 1         | Tobacco (cigarettes per capita)                     |
| Colon and rectum cancer | Male   | 15-19 years | 95+ years | 1         | Diabetes Age-Standardized Prevalence (proportion)   |
| Colon and rectum cancer | Male   | 15-19 years | 95+ years | -1        | Education (years per capita)                        |
| Colon and rectum cancer | Male   | 15-19 years | 95+ years | -1        | Health System Access 2 (unitless)                   |
| Colon and rectum cancer | Male   | 15-19 years | 95+ years | 0         | LDI (I\$ per capita)                                |
| Colon and rectum cancer | Male   | 15-19 years | 95+ years | 1         | Mean BMI                                            |
| Colon and rectum cancer | Male   | 15-19 years | 95+ years | 1         | Smoking Prevalence                                  |
| Colon and rectum cancer | Male   | 15-19 years | 95+ years | 1         | Log-transformed SEV scalar: Colorect C              |
| Colon and rectum cancer | Male   | 15-19 years | 95+ years | 0         | Socio-demographic Index                             |
| Colon and rectum cancer | Male   | 15-19 years | 95+ years | -1        | fruits adjusted (g)                                 |
| Colon and rectum cancer | Male   | 15-19 years | 95+ years | -1        | milk adjusted (g)                                   |
| Colon and rectum cancer | Male   | 15-19 years | 95+ years | -1        | nuts seeds adjusted (g)                             |
| Colon and rectum cancer | Male   | 15-19 years | 95+ years | -1        | PUFA adjusted (percent)                             |
| Colon and rectum cancer | Male   | 15-19 years | 95+ years | 1         | red meats adjusted (g)                              |
| Colon and rectum cancer | Male   | 15-19 years | 95+ years | -1        | vegetables adjusted (g)                             |
| Colon and rectum cancer | Male   | 15-19 years | 95+ years | -1        | whole grains adjusted (g)                           |
| Colon and rectum cancer | Male   | 15-19 years | 95+ years | -1        | Healthcare access and quality index                 |
| Colon and rectum cancer | Female | 15-19 years | 95+ years | 1         | Alcohol (liters per capita)                         |
| Colon and rectum cancer | Female | 15-19 years | 95+ years | 1         | Tobacco (cigarettes per capita)                     |

| Cause                      | Sex    | Age start   | Age end   | Direction | Covariate                                         |
|----------------------------|--------|-------------|-----------|-----------|---------------------------------------------------|
| Colon and rectum cancer    | Female | 15-19 years | 95+ years | 1         | Diabetes Age-Standardized Prevalence (proportion) |
| Colon and rectum cancer    | Female | 15-19 years | 95+ years | -1        | Education (years per capita)                      |
| Colon and rectum cancer    | Female | 15-19 years | 95+ years | -1        | Health System Access 2 (unitless)                 |
| Colon and rectum cancer    | Female | 15-19 years | 95+ years | 0         | LDI (I\$ per capita)                              |
| Colon and rectum cancer    | Female | 15-19 years | 95+ years | 1         | Mean BMI                                          |
| Colon and rectum cancer    | Female | 15-19 years | 95+ years | 1         | Smoking Prevalence                                |
| Colon and rectum cancer    | Female | 15-19 years | 95+ years | 1         | Log-transformed SEV scalar: Colorect C            |
| Colon and rectum cancer    | Female | 15-19 years | 95+ years | 0         | Socio-demographic Index                           |
| Colon and rectum cancer    | Female | 15-19 years | 95+ years | -1        | fruits adjusted (g)                               |
| Colon and rectum cancer    | Female | 15-19 years | 95+ years | -1        | milk adjusted (g)                                 |
| Colon and rectum cancer    | Female | 15-19 years | 95+ years | -1        | nuts seeds adjusted (g)                           |
| Colon and rectum cancer    | Female | 15-19 years | 95+ years | -1        | PUFA adjusted (percent)                           |
| Colon and rectum cancer    | Female | 15-19 years | 95+ years | 1         | red meats adjusted (g)                            |
| Colon and rectum cancer    | Female | 15-19 years | 95+ years | -1        | vegetables adjusted (g)                           |
| Colon and rectum cancer    | Female | 15-19 years | 95+ years | -1        | whole grains adjusted (g)                         |
| Colon and rectum cancer    | Female | 15-19 years | 95+ years | -1        | Healthcare access and quality index               |
| Lip and oral cavity cancer | Male   | 15-19 years | 95+ years | 1         | Alcohol (liters per capita)                       |
| Lip and oral cavity cancer | Male   | 15-19 years | 95+ years | 1         | Tobacco (cigarettes per capita)                   |
| Lip and oral cavity cancer | Male   | 15-19 years | 95+ years | 1         | Cumulative Cigarettes (10 Years)                  |
| Lip and oral cavity cancer | Male   | 15-19 years | 95+ years | 1         | Cumulative Cigarettes (15 Years)                  |
| Lip and oral cavity cancer | Male   | 15-19 years | 95+ years | 1         | Cumulative Cigarettes (20 Years)                  |
| Lip and oral cavity cancer | Male   | 15-19 years | 95+ years | 1         | Cumulative Cigarettes (5 Years)                   |
| Lip and oral cavity cancer | Male   | 15-19 years | 95+ years | -1        | Education (years per capita)                      |
| Lip and oral cavity cancer | Male   | 15-19 years | 95+ years | -1        | Health System Access 2 (unitless)                 |
| Lip and oral cavity cancer | Male   | 15-19 years | 95+ years | 0         | LDI (I\$ per capita)                              |
| Lip and oral cavity cancer | Male   | 15-19 years | 95+ years | 1         | Smoking Prevalence                                |
| Lip and oral cavity cancer | Male   | 15-19 years | 95+ years | 1         | Log-transformed SEV scalar: Mouth C               |
| Lip and oral cavity cancer | Male   | 15-19 years | 95+ years | 0         | Socio-demographic Index                           |
| Lip and oral cavity cancer | Male   | 15-19 years | 95+ years | -1        | fruits adjusted (g)                               |
| Lip and oral cavity cancer | Male   | 15-19 years | 95+ years | 1         | red meats adjusted (g)                            |

| Cause                      | Sex    | Age start   | Age end   | Direction | Covariate                                           |
|----------------------------|--------|-------------|-----------|-----------|-----------------------------------------------------|
| Lip and oral cavity cancer | Male   | 15-19 years | 95+ years | -1        | vegetables adjusted (g)                             |
| Lip and oral cavity cancer | Male   | 15-19 years | 95+ years | -1        | Healthcare access and quality index                 |
| Lip and oral cavity cancer | Female | 15-19 years | 95+ years | 1         | Alcohol (liters per capita)                         |
| Lip and oral cavity cancer | Female | 15-19 years | 95+ years | 1         | Cumulative Cigarettes (10 Years)                    |
| Lip and oral cavity cancer | Female | 15-19 years | 95+ years | 1         | Cumulative Cigarettes (20 Years)                    |
| Lip and oral cavity cancer | Female | 15-19 years | 95+ years | -1        | Education (years per capita)                        |
| Lip and oral cavity cancer | Female | 15-19 years | 95+ years | -1        | Fruits (kcal per capita)                            |
| Lip and oral cavity cancer | Female | 15-19 years | 95+ years | -1        | Health System Access 2 (unitless)                   |
| Lip and oral cavity cancer | Female | 15-19 years | 95+ years | -1        | LDI (I\$ per capita)                                |
| Lip and oral cavity cancer | Female | 15-19 years | 95+ years | 1         | Red Meat (kcal per capita)                          |
| Lip and oral cavity cancer | Female | 15-19 years | 95+ years | 1         | Smoking Prevalence                                  |
| Lip and oral cavity cancer | Female | 15-19 years | 95+ years | -1        | Vegetables (kcal per capita)                        |
| Lip and oral cavity cancer | Female | 15-19 years | 95+ years | 0         | Socio-demographic Index                             |
| Lip and oral cavity cancer | Female | 15-19 years | 95+ years | -1        | Healthcare access and quality index                 |
| Nasopharynx cancer         | Female | 5-9 years   | 95+ years | 1         | Alcohol (liters per capita)                         |
| Nasopharynx cancer         | Female | 5-9 years   | 95+ years | 1         | Tobacco (cigarettes per capita)                     |
| Nasopharynx cancer         | Female | 5-9 years   | 95+ years | 1         | Cumulative Cigarettes (10 Years)                    |
| Nasopharynx cancer         | Female | 5-9 years   | 95+ years | 1         | Cumulative Cigarettes (15 Years)                    |
| Nasopharynx cancer         | Female | 5-9 years   | 95+ years | 1         | Cumulative Cigarettes (20 Years)                    |
| Nasopharynx cancer         | Female | 5-9 years   | 95+ years | 1         | Cumulative Cigarettes (5 Years)                     |
| Nasopharynx cancer         | Female | 5-9 years   | 95+ years | -1        | Education (years per capita)                        |
| Nasopharynx cancer         | Female | 5-9 years   | 95+ years | -1        | Health System Access 2 (unitless)                   |
| Nasopharynx cancer         | Female | 5-9 years   | 95+ years | 0         | LDI (I\$ per capita)                                |
| Nasopharynx cancer         | Female | 5-9 years   | 95+ years | 1         | Population Density (over 1000 ppl/sqkm, proportion) |
| Nasopharynx cancer         | Female | 5-9 years   | 95+ years | 1         | Population Density (under 150 ppl/sqkm, proportion) |
| Nasopharynx cancer         | Female | 5-9 years   | 95+ years | 1         | Smoking Prevalence                                  |
| Nasopharynx cancer         | Female | 5-9 years   | 95+ years | 1         | Log-transformed SEV scalar: Nasoph C                |
| Nasopharynx cancer         | Female | 5-9 years   | 95+ years | 0         | Socio-demographic Index                             |
| Nasopharynx cancer         | Female | 5-9 years   | 95+ years | -1        | fruits adjusted (g)                                 |
| Nasopharynx cancer         | Female | 5-9 years   | 95+ years | -1        | vegetables adjusted (g)                             |

| Cause                | Sex    | Age start   | Age end   | Direction | Covariate                                           |
|----------------------|--------|-------------|-----------|-----------|-----------------------------------------------------|
| Nasopharynx cancer   | Female | 5-9 years   | 95+ years | -1        | whole grains adjusted (g)                           |
| Nasopharynx cancer   | Male   | 5-9 years   | 95+ years | 1         | Alcohol (liters per capita)                         |
| Nasopharynx cancer   | Male   | 5-9 years   | 95+ years | 1         | Tobacco (cigarettes per capita)                     |
| Nasopharynx cancer   | Male   | 5-9 years   | 95+ years | 1         | Cumulative Cigarettes (10 Years)                    |
| Nasopharynx cancer   | Male   | 5-9 years   | 95+ years | 1         | Cumulative Cigarettes (15 Years)                    |
| Nasopharynx cancer   | Male   | 5-9 years   | 95+ years | 1         | Cumulative Cigarettes (20 Years)                    |
| Nasopharynx cancer   | Male   | 5-9 years   | 95+ years | 1         | Cumulative Cigarettes (5 Years)                     |
| Nasopharynx cancer   | Male   | 5-9 years   | 95+ years | -1        | Education (years per capita)                        |
| Nasopharynx cancer   | Male   | 5-9 years   | 95+ years | -1        | Health System Access 2 (unitless)                   |
| Nasopharynx cancer   | Male   | 5-9 years   | 95+ years | 0         | LDI (I\$ per capita)                                |
| Nasopharynx cancer   | Male   | 5-9 years   | 95+ years | 1         | Population Density (over 1000 ppl/sqkm, proportion) |
| Nasopharynx cancer   | Male   | 5-9 years   | 95+ years | 1         | Population Density (under 150 ppl/sqkm, proportion) |
| Nasopharynx cancer   | Male   | 5-9 years   | 95+ years | 1         | Smoking Prevalence                                  |
| Nasopharynx cancer   | Male   | 5-9 years   | 95+ years | 1         | Log-transformed SEV scalar: Nasoph C                |
| Nasopharynx cancer   | Male   | 5-9 years   | 95+ years | 0         | Socio-demographic Index                             |
| Nasopharynx cancer   | Male   | 5-9 years   | 95+ years | -1        | fruits adjusted (g)                                 |
| Nasopharynx cancer   | Male   | 5-9 years   | 95+ years | -1        | vegetables adjusted (g)                             |
| Nasopharynx cancer   | Male   | 5-9 years   | 95+ years | -1        | whole grains adjusted (g)                           |
| Other pharynx cancer | Male   | 15-19 years | 95+ years | 1         | Alcohol (liters per capita)                         |
| Other pharynx cancer | Male   | 15-19 years | 95+ years | 1         | Cumulative Cigarettes (5 Years)                     |
| Other pharynx cancer | Male   | 15-19 years | 95+ years | -1        | Education (years per capita)                        |
| Other pharynx cancer | Male   | 15-19 years | 95+ years | 0         | LDI (I\$ per capita)                                |
| Other pharynx cancer | Male   | 15-19 years | 95+ years | 1         | Population Density (over 1000 ppl/sqkm, proportion) |
| Other pharynx cancer | Male   | 15-19 years | 95+ years | 1         | Population Density (under 150 ppl/sqkm, proportion) |
| Other pharynx cancer | Male   | 15-19 years | 95+ years | 1         | Smoking Prevalence                                  |
| Other pharynx cancer | Male   | 15-19 years | 95+ years | -1        | Health System Access (capped)                       |
| Other pharynx cancer | Male   | 15-19 years | 95+ years | 1         | Log-transformed SEV scalar: Oth Phar C              |
| Other pharynx cancer | Male   | 15-19 years | 95+ years | 0         | Socio-demographic Index                             |
| Other pharynx cancer | Male   | 15-19 years | 95+ years | -1        | fruits adjusted (g)                                 |
| Other pharynx cancer | Male   | 15-19 years | 95+ years | -1        | vegetables adjusted (g)                             |

| Cause                                | Sex    | Age start   | Age end   | Direction | Covariate                                           |
|--------------------------------------|--------|-------------|-----------|-----------|-----------------------------------------------------|
| Other pharynx cancer                 | Male   | 15-19 years | 95+ years | -1        | whole grains adjusted (g)                           |
| Other pharynx cancer                 | Female | 15-19 years | 95+ years | 1         | Alcohol (liters per capita)                         |
| Other pharynx cancer                 | Female | 15-19 years | 95+ years | 1         | Cumulative Cigarettes (5 Years)                     |
| Other pharynx cancer                 | Female | 15-19 years | 95+ years | -1        | Education (years per capita)                        |
| Other pharynx cancer                 | Female | 15-19 years | 95+ years | 0         | LDI (I\$ per capita)                                |
| Other pharynx cancer                 | Female | 15-19 years | 95+ years | 1         | Population Density (over 1000 ppl/sqkm, proportion) |
| Other pharynx cancer                 | Female | 15-19 years | 95+ years | 1         | Population Density (under 150 ppl/sqkm, proportion) |
| Other pharynx cancer                 | Female | 15-19 years | 95+ years | 1         | Smoking Prevalence                                  |
| Other pharynx cancer                 | Female | 15-19 years | 95+ years | -1        | Health System Access (capped)                       |
| Other pharynx cancer                 | Female | 15-19 years | 95+ years | 1         | Log-transformed SEV scalar: Oth Phar C              |
| Other pharynx cancer                 | Female | 15-19 years | 95+ years | 0         | Socio-demographic Index                             |
| Other pharynx cancer                 | Female | 15-19 years | 95+ years | -1        | fruits adjusted (g)                                 |
| Other pharynx cancer                 | Female | 15-19 years | 95+ years | -1        | vegetables adjusted (g)                             |
| Other pharynx cancer                 | Female | 15-19 years | 95+ years | -1        | whole grains adjusted (g)                           |
| Gallbladder and biliary tract cancer | Female | 15-19 years | 95+ years | 1         | Alcohol (liters per capita)                         |
| Gallbladder and biliary tract cancer | Female | 15-19 years | 95+ years | 1         | Tobacco (cigarettes per capita)                     |
| Gallbladder and biliary tract cancer | Female | 15-19 years | 95+ years | 1         | Cumulative Cigarettes (10 Years)                    |
| Gallbladder and biliary tract cancer | Female | 15-19 years | 95+ years | 1         | Cumulative Cigarettes (5 Years)                     |
| Gallbladder and biliary tract cancer | Female | 15-19 years | 95+ years | 1         | Diabetes Age-Standardized Prevalence (proportion)   |
| Gallbladder and biliary tract cancer | Female | 15-19 years | 95+ years | -1        | Education (years per capita)                        |
| Gallbladder and biliary tract cancer | Female | 15-19 years | 95+ years | 1         | Health System Access 2 (unitless)                   |
| Gallbladder and biliary tract cancer | Female | 15-19 years | 95+ years | 0         | LDI (I\$ per capita)                                |
| Gallbladder and biliary tract cancer | Female | 15-19 years | 95+ years | 1         | Mean BMI                                            |
| Gallbladder and biliary tract cancer | Female | 15-19 years | 95+ years | 1         | Smoking Prevalence                                  |
| Gallbladder and biliary tract cancer | Female | 15-19 years | 95+ years | 1         | Log-transformed SEV scalar: Gallblad C              |
| Gallbladder and biliary tract cancer | Female | 15-19 years | 95+ years | 0         | Socio-demographic Index                             |
| Gallbladder and biliary tract cancer | Female | 15-19 years | 95+ years | -1        | fruits adjusted (g)                                 |
| Gallbladder and biliary tract cancer | Female | 15-19 years | 95+ years | -1        | vegetables adjusted (g)                             |
| Gallbladder and biliary tract cancer | Female | 15-19 years | 95+ years | -1        | Healthcare access and quality index                 |
| Gallbladder and biliary tract cancer | Female | 15-19 years | 95+ years | -1        | Health System Access (capped)                       |

| Cause                                | Sex  | Age start   | Age end   | Direction | Covariate                                           |
|--------------------------------------|------|-------------|-----------|-----------|-----------------------------------------------------|
| Gallbladder and biliary tract cancer | Male | 15-19 years | 95+ years | 1         | Alcohol (liters per capita)                         |
| Gallbladder and biliary tract cancer | Male | 15-19 years | 95+ years | 1         | Tobacco (cigarettes per capita)                     |
| Gallbladder and biliary tract cancer | Male | 15-19 years | 95+ years | 1         | Cumulative Cigarettes (10 Years)                    |
| Gallbladder and biliary tract cancer | Male | 15-19 years | 95+ years | 1         | Cumulative Cigarettes (5 Years)                     |
| Gallbladder and biliary tract cancer | Male | 15-19 years | 95+ years | 1         | Diabetes Age-Standardized Prevalence (proportion)   |
| Gallbladder and biliary tract cancer | Male | 15-19 years | 95+ years | -1        | Education (years per capita)                        |
| Gallbladder and biliary tract cancer | Male | 15-19 years | 95+ years | 0         | LDI (I\$ per capita)                                |
| Gallbladder and biliary tract cancer | Male | 15-19 years | 95+ years | 1         | Mean BMI                                            |
| Gallbladder and biliary tract cancer | Male | 15-19 years | 95+ years | 1         | Smoking Prevalence                                  |
| Gallbladder and biliary tract cancer | Male | 15-19 years | 95+ years | -1        | Health System Access (capped)                       |
| Gallbladder and biliary tract cancer | Male | 15-19 years | 95+ years | 1         | Log-transformed SEV scalar: Gallblad C              |
| Gallbladder and biliary tract cancer | Male | 15-19 years | 95+ years | 0         | Socio-demographic Index                             |
| Gallbladder and biliary tract cancer | Male | 15-19 years | 95+ years | -1        | fruits adjusted (g)                                 |
| Gallbladder and biliary tract cancer | Male | 15-19 years | 95+ years | -1        | vegetables adjusted (g)                             |
| Gallbladder and biliary tract cancer | Male | 15-19 years | 95+ years | -1        | Healthcare access and quality index                 |
| Pancreatic cancer                    | Male | 15-19 years | 95+ years | 1         | Alcohol (liters per capita)                         |
| Pancreatic cancer                    | Male | 15-19 years | 95+ years | 1         | Tobacco (cigarettes per capita)                     |
| Pancreatic cancer                    | Male | 15-19 years | 95+ years | 1         | Cumulative Cigarettes (10 Years)                    |
| Pancreatic cancer                    | Male | 15-19 years | 95+ years | 1         | Cumulative Cigarettes (20 Years)                    |
| Pancreatic cancer                    | Male | 15-19 years | 95+ years | 1         | Cumulative Cigarettes (5 Years)                     |
| Pancreatic cancer                    | Male | 15-19 years | 95+ years | 1         | Diabetes Age-Standardized Prevalence (proportion)   |
| Pancreatic cancer                    | Male | 15-19 years | 95+ years | -1        | Education (years per capita)                        |
| Pancreatic cancer                    | Male | 15-19 years | 95+ years | 0         | LDI (I\$ per capita)                                |
| Pancreatic cancer                    | Male | 15-19 years | 95+ years | 1         | Mean BMI                                            |
| Pancreatic cancer                    | Male | 15-19 years | 95+ years | 1         | Percent of total calories consumed as saturated fat |
| Pancreatic cancer                    | Male | 15-19 years | 95+ years | 1         | Smoking Prevalence                                  |
| Pancreatic cancer                    | Male | 15-19 years | 95+ years | 1         | Total Calories (kcal per capita)                    |
| Pancreatic cancer                    | Male | 15-19 years | 95+ years | 1         | Log-transformed SEV scalar: Pancreas C              |
| Pancreatic cancer                    | Male | 15-19 years | 95+ years | 0         | Socio-demographic Index                             |
| Pancreatic cancer                    | Male | 15-19 years | 95+ years | -1        | fruits adjusted (g)                                 |



| Cause                   | Sex    | Age start   | Age end   | Direction | Covariate                                           |
|-------------------------|--------|-------------|-----------|-----------|-----------------------------------------------------|
| Pancreatic cancer       | Male   | 15-19 years | 95+ years | 1         | red meats adjusted (g)                              |
| Pancreatic cancer       | Male   | 15-19 years | 95+ years | -1        | vegetables adjusted (g)                             |
| Pancreatic cancer       | Male   | 15-19 years | 95+ years | -1        | Healthcare access and quality index                 |
| Pancreatic cancer       | Female | 15-19 years | 95+ years | 1         | Alcohol (liters per capita)                         |
| Pancreatic cancer       | Female | 15-19 years | 95+ years | 1         | Tobacco (cigarettes per capita)                     |
| Pancreatic cancer       | Female | 15-19 years | 95+ years | 1         | Cumulative Cigarettes (10 Years)                    |
| Pancreatic cancer       | Female | 15-19 years | 95+ years | 1         | Cumulative Cigarettes (20 Years)                    |
| Pancreatic cancer       | Female | 15-19 years | 95+ years | 1         | Cumulative Cigarettes (5 Years)                     |
| Pancreatic cancer       | Female | 15-19 years | 95+ years | 1         | Diabetes Age-Standardized Prevalence (proportion)   |
| Pancreatic cancer       | Female | 15-19 years | 95+ years | -1        | Education (years per capita)                        |
| Pancreatic cancer       | Female | 15-19 years | 95+ years | 0         | LDI (I\$ per capita)                                |
| Pancreatic cancer       | Female | 15-19 years | 95+ years | 1         | Mean BMI                                            |
| Pancreatic cancer       | Female | 15-19 years | 95+ years | 1         | Percent of total calories consumed as saturated fat |
| Pancreatic cancer       | Female | 15-19 years | 95+ years | 1         | Smoking Prevalence                                  |
| Pancreatic cancer       | Female | 15-19 years | 95+ years | 1         | Log-transformed SEV scalar: Pancreas C              |
| Pancreatic cancer       | Female | 15-19 years | 95+ years | 0         | Socio-demographic Index                             |
| Pancreatic cancer       | Female | 15-19 years | 95+ years | -1        | fruits adjusted (g)                                 |
| Pancreatic cancer       | Female | 15-19 years | 95+ years | 1         | red meats adjusted (g)                              |
| Pancreatic cancer       | Female | 15-19 years | 95+ years | -1        | vegetables adjusted (g)                             |
| Pancreatic cancer       | Female | 15-19 years | 95+ years | 1         | energy unadjusted (kcal)                            |
| Pancreatic cancer       | Female | 15-19 years | 95+ years | -1        | Healthcare access and quality index                 |
| Pancreatic cancer       | Male   | 15-19 years | 95+ years | 1         | energy unadjusted (kcal)                            |
| Pancreatic cancer       | Female | 15-19 years | 95+ years | 1         | vegetables adjusted (g)                             |
| Pancreatic cancer       | Female | 15-19 years | 95+ years | -1        | vegetables unadjusted (g)                           |
| Malignant skin melanoma | Male   | 15-19 years | 95+ years | 1         | Alcohol (liters per capita)                         |
| Malignant skin melanoma | Male   | 15-19 years | 95+ years | -1        | Education (years per capita)                        |
| Malignant skin melanoma | Male   | 15-19 years | 95+ years | 0         | LDI (I\$ per capita)                                |
| Malignant skin melanoma | Male   | 15-19 years | 95+ years | 0         | Latitude Under 15 (proportion)                      |
| Malignant skin melanoma | Male   | 15-19 years | 95+ years | 0         | Latitude 15 to 30 (proportion)                      |
| Malignant skin melanoma | Male   | 15-19 years | 95+ years | -1        | Latitude 30 to 45 (proportion)                      |

| Cause                    | Sex    | Age start   | Age end   | Direction | Covariate                           |
|--------------------------|--------|-------------|-----------|-----------|-------------------------------------|
| Malignant skin melanoma  | Male   | 15-19 years | 95+ years | -1        | Latitude Over 45 (proportion)       |
| Malignant skin melanoma  | Male   | 15-19 years | 95+ years | 0         | Socio-demographic Index             |
| Malignant skin melanoma  | Male   | 15-19 years | 95+ years | -1        | fruits adjusted (g)                 |
| Malignant skin melanoma  | Male   | 15-19 years | 95+ years | -1        | vegetables adjusted (g)             |
| Malignant skin melanoma  | Male   | 15-19 years | 95+ years | -1        | Healthcare access and quality index |
| Malignant skin melanoma  | Female | 15-19 years | 95+ years | 1         | Alcohol (liters per capita)         |
| Malignant skin melanoma  | Female | 15-19 years | 95+ years | -1        | Education (years per capita)        |
| Malignant skin melanoma  | Female | 15-19 years | 95+ years | 0         | LDI (I\$ per capita)                |
| Malignant skin melanoma  | Female | 15-19 years | 95+ years | 0         | Latitude Under 15 (proportion)      |
| Malignant skin melanoma  | Female | 15-19 years | 95+ years | 0         | Latitude 15 to 30 (proportion)      |
| Malignant skin melanoma  | Female | 15-19 years | 95+ years | -1        | Latitude 30 to 45 (proportion)      |
| Malignant skin melanoma  | Female | 15-19 years | 95+ years | -1        | Latitude Over 45 (proportion)       |
| Malignant skin melanoma  | Female | 15-19 years | 95+ years | 0         | Socio-demographic Index             |
| Malignant skin melanoma  | Female | 15-19 years | 95+ years | -1        | fruits adjusted (g)                 |
| Malignant skin melanoma  | Female | 15-19 years | 95+ years | -1        | vegetables adjusted (g)             |
| Malignant skin melanoma  | Female | 15-19 years | 95+ years | -1        | Healthcare access and quality index |
| Non-melanoma skin cancer | Male   | 15-19 years | 95+ years | 1         | Cumulative Cigarettes (10 Years)    |
| Non-melanoma skin cancer | Male   | 15-19 years | 95+ years | 1         | Cumulative Cigarettes (15 Years)    |
| Non-melanoma skin cancer | Male   | 15-19 years | 95+ years | 1         | Cumulative Cigarettes (5 Years)     |
| Non-melanoma skin cancer | Male   | 15-19 years | 95+ years | -1        | Education (years per capita)        |
| Non-melanoma skin cancer | Male   | 15-19 years | 95+ years | 0         | Average latitude                    |
| Non-melanoma skin cancer | Male   | 15-19 years | 95+ years | 0         | LDI (I\$ per capita)                |
| Non-melanoma skin cancer | Male   | 15-19 years | 95+ years | 1         | Smoking Prevalence                  |
| Non-melanoma skin cancer | Male   | 15-19 years | 95+ years | 0         | Socio-demographic Index             |
| Non-melanoma skin cancer | Male   | 15-19 years | 95+ years | -1        | Healthcare access and quality index |
| Non-melanoma skin cancer | Male   | 15-19 years | 95+ years | -1        | Health System Access (capped)       |
| Non-melanoma skin cancer | Female | 15-19 years | 95+ years | 1         | Cumulative Cigarettes (10 Years)    |
| Non-melanoma skin cancer | Female | 15-19 years | 95+ years | 1         | Cumulative Cigarettes (15 Years)    |
| Non-melanoma skin cancer | Female | 15-19 years | 95+ years | 1         | Cumulative Cigarettes (5 Years)     |
| Non-melanoma skin cancer | Female | 15-19 years | 95+ years | -1        | Education (years per capita)        |

| Cause                    | Sex    | Age start   | Age end   | Direction | Covariate                                           |
|--------------------------|--------|-------------|-----------|-----------|-----------------------------------------------------|
| Non-melanoma skin cancer | Female | 15-19 years | 95+ years | 0         | Average latitude                                    |
| Non-melanoma skin cancer | Female | 15-19 years | 95+ years | 0         | LDI (I\$ per capita)                                |
| Non-melanoma skin cancer | Female | 15-19 years | 95+ years | 1         | Smoking Prevalence                                  |
| Non-melanoma skin cancer | Female | 15-19 years | 95+ years | 0         | Socio-demographic Index                             |
| Non-melanoma skin cancer | Female | 15-19 years | 95+ years | -1        | Healthcare access and quality index                 |
| Non-melanoma skin cancer | Female | 15-19 years | 95+ years | -1        | Health System Access (capped)                       |
| Ovarian cancer           | Female | 15-19 years | 95+ years | 1         | Alcohol (liters per capita)                         |
| Ovarian cancer           | Female | 15-19 years | 95+ years | 1         | Tobacco (cigarettes per capita)                     |
| Ovarian cancer           | Female | 15-19 years | 95+ years | -1        | Contraception (Modern) Prevalence (proportion)      |
| Ovarian cancer           | Female | 15-19 years | 95+ years | 1         | Cumulative Cigarettes (20 Years)                    |
| Ovarian cancer           | Female | 15-19 years | 95+ years | 1         | Diabetes Age-Standardized Prevalence (proportion)   |
| Ovarian cancer           | Female | 15-19 years | 95+ years | -1        | Education (years per capita)                        |
| Ovarian cancer           | Female | 15-19 years | 95+ years | 0         | LDI (I\$ per capita)                                |
| Ovarian cancer           | Female | 15-19 years | 95+ years | 1         | Mean BMI                                            |
| Ovarian cancer           | Female | 15-19 years | 95+ years | 1         | Percent of total calories consumed as saturated fat |
| Ovarian cancer           | Female | 15-19 years | 95+ years | 1         | Smoking Prevalence                                  |
| Ovarian cancer           | Female | 15-19 years | 95+ years | 0         | Total Fertility Rate                                |
| Ovarian cancer           | Female | 15-19 years | 95+ years | 1         | Log-transformed SEV scalar: Ovary C                 |
| Ovarian cancer           | Female | 15-19 years | 95+ years | 0         | Socio-demographic Index                             |
| Ovarian cancer           | Female | 15-19 years | 95+ years | -1        | fruits adjusted (g)                                 |
| Ovarian cancer           | Female | 15-19 years | 95+ years | -1        | vegetables adjusted (g)                             |
| Ovarian cancer           | Female | 15-19 years | 95+ years | 1         | energy unadjusted (kcal)                            |
| Ovarian cancer           | Female | 15-19 years | 95+ years | -1        | Healthcare access and quality index                 |
| Testicular cancer        | Male   | 15-19 years | 95+ years | 1         | Cumulative Cigarettes (10 Years)                    |
| Testicular cancer        | Male   | 15-19 years | 95+ years | 1         | Cumulative Cigarettes (15 Years)                    |
| Testicular cancer        | Male   | 15-19 years | 95+ years | 1         | Cumulative Cigarettes (5 Years)                     |
| Testicular cancer        | Male   | 15-19 years | 95+ years | -1        | Education (years per capita)                        |
| Testicular cancer        | Male   | 15-19 years | 95+ years | -1        | Fruits (kcal per capita)                            |
| Testicular cancer        | Male   | 15-19 years | 95+ years | -1        | Health System Access 2 (unitless)                   |
| Testicular cancer        | Male   | 15-19 years | 95+ years | -1        | LDI (I\$ per capita)                                |

| Cause             | Sex    | Age start   | Age end   | Direction | Covariate                                         |
|-------------------|--------|-------------|-----------|-----------|---------------------------------------------------|
| Testicular cancer | Male   | 15-19 years | 95+ years | -1        | Vegetables (kcal per capita)                      |
| Testicular cancer | Male   | 15-19 years | 95+ years | 0         | Socio-demographic Index                           |
| Testicular cancer | Male   | 15-19 years | 95+ years | -1        | Healthcare access and quality index               |
| Kidney cancer     | Male   | 0-6 days    | 95+ years | 1         | Alcohol (liters per capita)                       |
| Kidney cancer     | Male   | 0-6 days    | 95+ years | 1         | Cumulative Cigarettes (10 Years)                  |
| Kidney cancer     | Male   | 0-6 days    | 95+ years | 1         | Cumulative Cigarettes (15 Years)                  |
| Kidney cancer     | Male   | 0-6 days    | 95+ years | 1         | Cumulative Cigarettes (5 Years)                   |
| Kidney cancer     | Male   | 0-6 days    | 95+ years | 1         | Diabetes Age-Standardized Prevalence (proportion) |
| Kidney cancer     | Male   | 0-6 days    | 95+ years | -1        | Education (years per capita)                      |
| Kidney cancer     | Male   | 0-6 days    | 95+ years | -1        | Health System Access 2 (unitless)                 |
| Kidney cancer     | Male   | 0-6 days    | 95+ years | 0         | LDI (I\$ per capita)                              |
| Kidney cancer     | Male   | 0-6 days    | 95+ years | 1         | Mean BMI                                          |
| Kidney cancer     | Male   | 0-6 days    | 95+ years | 1         | Systolic Blood Pressure (mmHg)                    |
| Kidney cancer     | Male   | 0-6 days    | 95+ years | 1         | Smoking Prevalence                                |
| Kidney cancer     | Male   | 0-6 days    | 95+ years | 1         | Log-transformed SEV scalar: Kidney C              |
| Kidney cancer     | Male   | 0-6 days    | 95+ years | 0         | Socio-demographic Index                           |
| Kidney cancer     | Female | 0-6 days    | 95+ years | 1         | Alcohol (liters per capita)                       |
| Kidney cancer     | Female | 0-6 days    | 95+ years | 1         | Cumulative Cigarettes (10 Years)                  |
| Kidney cancer     | Female | 0-6 days    | 95+ years | 1         | Cumulative Cigarettes (15 Years)                  |
| Kidney cancer     | Female | 0-6 days    | 95+ years | 1         | Cumulative Cigarettes (5 Years)                   |
| Kidney cancer     | Female | 0-6 days    | 95+ years | 1         | Diabetes Age-Standardized Prevalence (proportion) |
| Kidney cancer     | Female | 0-6 days    | 95+ years | -1        | Education (years per capita)                      |
| Kidney cancer     | Female | 0-6 days    | 95+ years | -1        | Health System Access 2 (unitless)                 |
| Kidney cancer     | Female | 0-6 days    | 95+ years | -1        | LDI (I\$ per capita)                              |
| Kidney cancer     | Female | 0-6 days    | 95+ years | 1         | Mean BMI                                          |
| Kidney cancer     | Female | 0-6 days    | 95+ years | 1         | Systolic Blood Pressure (mmHg)                    |
| Kidney cancer     | Female | 0-6 days    | 95+ years | 1         | Smoking Prevalence                                |
| Kidney cancer     | Female | 0-6 days    | 95+ years | 0         | Total Fertility Rate                              |
| Kidney cancer     | Female | 0-6 days    | 95+ years | 1         | Total Calories (kcal per capita)                  |
| Kidney cancer     | Female | 0-6 days    | 95+ years | 1         | Log-transformed SEV scalar: Kidney C              |

| Cause          | Sex    | Age start   | Age end   | Direction | Covariate                                           |
|----------------|--------|-------------|-----------|-----------|-----------------------------------------------------|
| Kidney cancer  | Female | 0-6 days    | 95+ years | 1         | Socio-demographic Index                             |
| Kidney cancer  | Female | 0-6 days    | 95+ years | 0         | LDI (I\$ per capita)                                |
| Kidney cancer  | Female | 0-6 days    | 95+ years | 0         | Socio-demographic Index                             |
| Bladder cancer | Male   | 15-19 years | 95+ years | 1         | Alcohol (liters per capita)                         |
| Bladder cancer | Male   | 15-19 years | 95+ years | 1         | Cumulative Cigarettes (10 Years)                    |
| Bladder cancer | Male   | 15-19 years | 95+ years | 1         | Cumulative Cigarettes (15 Years)                    |
| Bladder cancer | Male   | 15-19 years | 95+ years | 1         | Cumulative Cigarettes (5 Years)                     |
| Bladder cancer | Male   | 15-19 years | 95+ years | -1        | Education (years per capita)                        |
| Bladder cancer | Male   | 15-19 years | 95+ years | 0         | LDI (I\$ per capita)                                |
| Bladder cancer | Male   | 15-19 years | 95+ years | 1         | Population Density (over 1000 ppl/sqkm, proportion) |
| Bladder cancer | Male   | 15-19 years | 95+ years | 1         | Population Density (under 150 ppl/sqkm, proportion) |
| Bladder cancer | Male   | 15-19 years | 95+ years | 1         | Smoking Prevalence                                  |
| Bladder cancer | Male   | 15-19 years | 95+ years | 1         | Log-transformed SEV scalar: Bladder C               |
| Bladder cancer | Male   | 15-19 years | 95+ years | 0         | Socio-demographic Index                             |
| Bladder cancer | Male   | 15-19 years | 95+ years | -1        | fruits adjusted (g)                                 |
| Bladder cancer | Male   | 15-19 years | 95+ years | -1        | vegetables adjusted (g)                             |
| Bladder cancer | Male   | 15-19 years | 95+ years | -1        | Healthcare access and quality index                 |
| Bladder cancer | Female | 15-19 years | 95+ years | 1         | Alcohol (liters per capita)                         |
| Bladder cancer | Female | 15-19 years | 95+ years | 1         | Cumulative Cigarettes (10 Years)                    |
| Bladder cancer | Female | 15-19 years | 95+ years | 1         | Cumulative Cigarettes (15 Years)                    |
| Bladder cancer | Female | 15-19 years | 95+ years | 1         | Cumulative Cigarettes (5 Years)                     |
| Bladder cancer | Female | 15-19 years | 95+ years | -1        | Education (years per capita)                        |
| Bladder cancer | Female | 15-19 years | 95+ years | 0         | LDI (I\$ per capita)                                |
| Bladder cancer | Female | 15-19 years | 95+ years | 1         | Population Density (over 1000 ppl/sqkm, proportion) |
| Bladder cancer | Female | 15-19 years | 95+ years | 1         | Population Density (under 150 ppl/sqkm, proportion) |
| Bladder cancer | Female | 15-19 years | 95+ years | 1         | Smoking Prevalence                                  |
| Bladder cancer | Female | 15-19 years | 95+ years | 1         | Log-transformed SEV scalar: Bladder C               |
| Bladder cancer | Female | 15-19 years | 95+ years | 0         | Socio-demographic Index                             |
| Bladder cancer | Female | 15-19 years | 95+ years | -1        | fruits adjusted (g)                                 |
| Bladder cancer | Female | 15-19 years | 95+ years | -1        | vegetables adjusted (g)                             |

| Cause                           | Sex    | Age start   | Age end   | Direction | Covariate                                           |
|---------------------------------|--------|-------------|-----------|-----------|-----------------------------------------------------|
| Bladder cancer                  | Female | 15-19 years | 95+ years | -1        | Healthcare access and quality index                 |
| Brain and nervous system cancer | Female | 0-6 days    | 95+ years | 1         | Alcohol (liters per capita)                         |
| Brain and nervous system cancer | Female | 0-6 days    | 95+ years | 1         | Cumulative Cigarettes (10 Years)                    |
| Brain and nervous system cancer | Female | 0-6 days    | 95+ years | 1         | Cumulative Cigarettes (15 Years)                    |
| Brain and nervous system cancer | Female | 0-6 days    | 95+ years | -1        | Education (years per capita)                        |
| Brain and nervous system cancer | Female | 0-6 days    | 95+ years | 0         | LDI (I\$ per capita)                                |
| Brain and nervous system cancer | Female | 0-6 days    | 95+ years | 1         | Cholesterol (total, mean per capita)                |
| Brain and nervous system cancer | Female | 0-6 days    | 95+ years | 1         | Systolic Blood Pressure (mmHg)                      |
| Brain and nervous system cancer | Female | 0-6 days    | 95+ years | 1         | Percent of total calories consumed as saturated fat |
| Brain and nervous system cancer | Female | 0-6 days    | 95+ years | 1         | Smoking Prevalence                                  |
| Brain and nervous system cancer | Female | 0-6 days    | 95+ years | 0         | Socio-demographic Index                             |
| Brain and nervous system cancer | Female | 0-6 days    | 95+ years | -1        | fruits adjusted (g)                                 |
| Brain and nervous system cancer | Female | 0-6 days    | 95+ years | 1         | red meats adjusted (g)                              |
| Brain and nervous system cancer | Female | 0-6 days    | 95+ years | -1        | vegetables adjusted (g)                             |
| Brain and nervous system cancer | Female | 0-6 days    | 95+ years | -1        | Healthcare access and quality index                 |
| Brain and nervous system cancer | Male   | 0-6 days    | 95+ years | 1         | Alcohol (liters per capita)                         |
| Brain and nervous system cancer | Male   | 0-6 days    | 95+ years | 1         | Cumulative Cigarettes (10 Years)                    |
| Brain and nervous system cancer | Male   | 0-6 days    | 95+ years | 1         | Cumulative Cigarettes (15 Years)                    |
| Brain and nervous system cancer | Male   | 0-6 days    | 95+ years | -1        | Education (years per capita)                        |
| Brain and nervous system cancer | Male   | 0-6 days    | 95+ years | 0         | LDI (I\$ per capita)                                |
| Brain and nervous system cancer | Male   | 0-6 days    | 95+ years | 1         | Cholesterol (total, mean per capita)                |
| Brain and nervous system cancer | Male   | 0-6 days    | 95+ years | 1         | Systolic Blood Pressure (mmHg)                      |
| Brain and nervous system cancer | Male   | 0-6 days    | 95+ years | 1         | Percent of total calories consumed as saturated fat |
| Brain and nervous system cancer | Male   | 0-6 days    | 95+ years | 1         | Smoking Prevalence                                  |
| Brain and nervous system cancer | Male   | 0-6 days    | 95+ years | -1        | Vegetables (kcal per capita)                        |
| Brain and nervous system cancer | Male   | 0-6 days    | 95+ years | 0         | Socio-demographic Index                             |
| Brain and nervous system cancer | Male   | 0-6 days    | 95+ years | -1        | fruits adjusted (g)                                 |
| Brain and nervous system cancer | Male   | 0-6 days    | 95+ years | 1         | red meats adjusted (g)                              |
| Brain and nervous system cancer | Male   | 0-6 days    | 95+ years | -1        | vegetables adjusted (g)                             |
| Brain and nervous system cancer | Male   | 0-6 days    | 95+ years | -1        | Healthcare access and quality index                 |

| Cause          | Sex    | Age start   | Age end   | Direction | Covariate                                      |
|----------------|--------|-------------|-----------|-----------|------------------------------------------------|
| Thyroid cancer | Female | 10-14 years | 95+ years | 1         | Alcohol (liters per capita)                    |
| Thyroid cancer | Female | 10-14 years | 95+ years | 1         | Tobacco (cigarettes per capita)                |
| Thyroid cancer | Female | 10-14 years | 95+ years | -1        | Education (years per capita)                   |
| Thyroid cancer | Female | 10-14 years | 95+ years | 0         | LDI (I\$ per capita)                           |
| Thyroid cancer | Female | 10-14 years | 95+ years | 1         | Mean BMI                                       |
| Thyroid cancer | Female | 10-14 years | 95+ years | -1        | Sanitation (proportion with access)            |
| Thyroid cancer | Female | 10-14 years | 95+ years | 1         | Smoking Prevalence                             |
| Thyroid cancer | Female | 10-14 years | 95+ years | -1        | Improved Water Source (proportion with access) |
| Thyroid cancer | Female | 10-14 years | 95+ years | 1         | Log-transformed SEV scalar: Thyroid C          |
| Thyroid cancer | Female | 10-14 years | 95+ years | 0         | Socio-demographic Index                        |
| Thyroid cancer | Female | 10-14 years | 95+ years | -1        | fruits adjusted (g)                            |
| Thyroid cancer | Female | 10-14 years | 95+ years | 1         | red meats adjusted (g)                         |
| Thyroid cancer | Female | 10-14 years | 95+ years | -1        | vegetables adjusted (g)                        |
| Thyroid cancer | Female | 10-14 years | 95+ years | -1        | Healthcare access and quality index            |
| Thyroid cancer | Male   | 10-14 years | 95+ years | 1         | Alcohol (liters per capita)                    |
| Thyroid cancer | Male   | 10-14 years | 95+ years | 1         | Tobacco (cigarettes per capita)                |
| Thyroid cancer | Male   | 10-14 years | 95+ years | -1        | Education (years per capita)                   |
| Thyroid cancer | Male   | 10-14 years | 95+ years | 0         | LDI (I\$ per capita)                           |
| Thyroid cancer | Male   | 10-14 years | 95+ years | 1         | Mean BMI                                       |
| Thyroid cancer | Male   | 10-14 years | 95+ years | -1        | Sanitation (proportion with access)            |
| Thyroid cancer | Male   | 10-14 years | 95+ years | 1         | Smoking Prevalence                             |
| Thyroid cancer | Male   | 10-14 years | 95+ years | -1        | Improved Water Source (proportion with access) |
| Thyroid cancer | Male   | 10-14 years | 95+ years | 1         | Log-transformed SEV scalar: Thyroid C          |
| Thyroid cancer | Male   | 10-14 years | 95+ years | 0         | Socio-demographic Index                        |
| Thyroid cancer | Male   | 10-14 years | 95+ years | -1        | fruits adjusted (g)                            |
| Thyroid cancer | Male   | 10-14 years | 95+ years | 1         | red meats adjusted (g)                         |
| Thyroid cancer | Male   | 10-14 years | 95+ years | -1        | vegetables adjusted (g)                        |
| Thyroid cancer | Male   | 10-14 years | 95+ years | -1        | Healthcare access and quality index            |
| Thyroid cancer | Male   | 10-14 years | 95+ years | 2         | Smoking Prevalence                             |
| Mesothelioma   | Female | 15-19 years | 95+ years | 1         | Asbestos production (binary)                   |

| Cause        | Sex    | Age start   | Age end   | Direction | Covariate                                              |
|--------------|--------|-------------|-----------|-----------|--------------------------------------------------------|
| Mesothelioma | Female | 15-19 years | 95+ years | 1         | Asbestos production (kg) per capita                    |
| Mesothelioma | Female | 15-19 years | 95+ years | 1         | Cumulative Cigarettes (5 Years)                        |
| Mesothelioma | Female | 15-19 years | 95+ years | -1        | Education (years per capita)                           |
| Mesothelioma | Female | 15-19 years | 95+ years | 1         | Gold production (binary)                               |
| Mesothelioma | Female | 15-19 years | 95+ years | 1         | Gold production (kg) per capita                        |
| Mesothelioma | Female | 15-19 years | 95+ years | 0         | LDI (I\$ per capita)                                   |
| Mesothelioma | Female | 15-19 years | 95+ years | 1         | Indoor Air Pollution (All Cooking Fuels)               |
| Mesothelioma | Female | 15-19 years | 95+ years | 1         | Elevation Over 1500m (proportion)                      |
| Mesothelioma | Female | 15-19 years | 95+ years | 1         | Elevation 500 to 1500m (proportion)                    |
| Mesothelioma | Female | 15-19 years | 95+ years | 1         | Population Density (over 1000 ppl/sqkm, proportion)    |
| Mesothelioma | Female | 15-19 years | 95+ years | 1         | Population Over 65 (proportion)                        |
| Mesothelioma | Female | 15-19 years | 95+ years | 1         | Smoking Prevalence                                     |
| Mesothelioma | Female | 15-19 years | 95+ years | 1         | Log-transformed SEV scalar: Mesothel                   |
| Mesothelioma | Female | 15-19 years | 95+ years | 0         | Socio-demographic Index                                |
| Mesothelioma | Female | 15-19 years | 95+ years | 1         | Asbestos consumption (metric tons per year per capita) |
| Mesothelioma | Female | 15-19 years | 95+ years | -1        | Healthcare access and quality index                    |
| Mesothelioma | Male   | 15-19 years | 95+ years | 1         | Cumulative Cigarettes (5 Years)                        |
| Mesothelioma | Male   | 15-19 years | 95+ years | -1        | Education (years per capita)                           |
| Mesothelioma | Male   | 15-19 years | 95+ years | 1         | Gold production (binary)                               |
| Mesothelioma | Male   | 15-19 years | 95+ years | 1         | Gold production (kg) per capita                        |
| Mesothelioma | Male   | 15-19 years | 95+ years | 0         | LDI (I\$ per capita)                                   |
| Mesothelioma | Male   | 15-19 years | 95+ years | 1         | Indoor Air Pollution (All Cooking Fuels)               |
| Mesothelioma | Male   | 15-19 years | 95+ years | 1         | Elevation Over 1500m (proportion)                      |
| Mesothelioma | Male   | 15-19 years | 95+ years | 1         | Elevation 500 to 1500m (proportion)                    |
| Mesothelioma | Male   | 15-19 years | 95+ years | 1         | Population Density (over 1000 ppl/sqkm, proportion)    |
| Mesothelioma | Male   | 15-19 years | 95+ years | 1         | Population Over 65 (proportion)                        |
| Mesothelioma | Male   | 15-19 years | 95+ years | 1         | Smoking Prevalence                                     |
| Mesothelioma | Male   | 15-19 years | 95+ years | 0         | Socio-demographic Index                                |
| Mesothelioma | Male   | 15-19 years | 95+ years | 1         | Asbestos consumption (metric tons per year per capita) |
| Mesothelioma | Male   | 15-19 years | 95+ years | -1        | Healthcare access and quality index                    |



| Cause                | Sex    | Age start   | Age end   | Direction | Covariate                           |
|----------------------|--------|-------------|-----------|-----------|-------------------------------------|
| Hodgkin lymphoma     | Male   | 0-6 days    | 95+ years | -1        | Education (years per capita)        |
| Hodgkin lymphoma     | Male   | 0-6 days    | 95+ years | 0         | LDI (I\$ per capita)                |
| Hodgkin lymphoma     | Male   | 0-6 days    | 95+ years | 0         | Socio-demographic Index             |
| Hodgkin lymphoma     | Male   | 0-6 days    | 95+ years | -1        | Healthcare access and quality index |
| Hodgkin lymphoma     | Female | 0-6 days    | 95+ years | -1        | Education (years per capita)        |
| Hodgkin lymphoma     | Female | 0-6 days    | 95+ years | 0         | LDI (I\$ per capita)                |
| Hodgkin lymphoma     | Female | 0-6 days    | 95+ years | 0         | Socio-demographic Index             |
| Hodgkin lymphoma     | Female | 0-6 days    | 95+ years | -1        | Healthcare access and quality index |
| Non-Hodgkin lymphoma | Male   | 0-6 days    | 95+ years | 1         | Alcohol (liters per capita)         |
| Non-Hodgkin lymphoma | Male   | 0-6 days    | 95+ years | 1         | Cumulative Cigarettes (10 Years)    |
| Non-Hodgkin lymphoma | Male   | 0-6 days    | 95+ years | -1        | Health System Access 2 (unitless)   |
| Non-Hodgkin lymphoma | Male   | 0-6 days    | 95+ years | 0         | LDI (I\$ per capita)                |
| Non-Hodgkin lymphoma | Male   | 0-6 days    | 95+ years | 1         | Smoking Prevalence                  |
| Non-Hodgkin lymphoma | Male   | 0-6 days    | 95+ years | 0         | Socio-demographic Index             |
| Non-Hodgkin lymphoma | Male   | 0-6 days    | 95+ years | -1        | Health System Access (capped)       |
| Non-Hodgkin lymphoma | Male   | 0-6 days    | 95+ years | -1        | Healthcare access and quality index |
| Non-Hodgkin lymphoma | Female | 0-6 days    | 95+ years | 1         | Alcohol (liters per capita)         |
| Non-Hodgkin lymphoma | Female | 0-6 days    | 95+ years | 1         | Cumulative Cigarettes (10 Years)    |
| Non-Hodgkin lymphoma | Female | 0-6 days    | 95+ years | -1        | Health System Access 2 (unitless)   |
| Non-Hodgkin lymphoma | Female | 0-6 days    | 95+ years | 0         | LDI (I\$ per capita)                |
| Non-Hodgkin lymphoma | Female | 0-6 days    | 95+ years | 1         | Smoking Prevalence                  |
| Non-Hodgkin lymphoma | Female | 0-6 days    | 95+ years | 0         | Socio-demographic Index             |
| Non-Hodgkin lymphoma | Female | 0-6 days    | 95+ years | -1        | Healthcare access and quality index |
| Non-Hodgkin lymphoma | Female | 0-6 days    | 95+ years | 0         | Total Fertility Rate                |
| Multiple myeloma     | Male   | 15-19 years | 95+ years | 1         | Alcohol (liters per capita)         |
| Multiple myeloma     | Male   | 15-19 years | 95+ years | 1         | Tobacco (cigarettes per capita)     |
| Multiple myeloma     | Male   | 15-19 years | 95+ years | -1        | Education (years per capita)        |
| Multiple myeloma     | Male   | 15-19 years | 95+ years | 0         | LDI (I\$ per capita)                |
| Multiple myeloma     | Male   | 15-19 years | 95+ years | 1         | Mean BMI                            |
| Multiple myeloma     | Male   | 15-19 years | 95+ years | -1        | Sanitation (proportion with access) |

| Cause            | Sex    | Age start   | Age end   | Direction | Covariate                                      |
|------------------|--------|-------------|-----------|-----------|------------------------------------------------|
| Multiple myeloma | Male   | 15-19 years | 95+ years | 1         | Smoking Prevalence                             |
| Multiple myeloma | Male   | 15-19 years | 95+ years | -1        | Improved Water Source (proportion with access) |
| Multiple myeloma | Male   | 15-19 years | 95+ years | 0         | Socio-demographic Index                        |
| Multiple myeloma | Male   | 15-19 years | 95+ years | -1        | fruits adjusted (g)                            |
| Multiple myeloma | Male   | 15-19 years | 95+ years | 1         | red meats adjusted (g)                         |
| Multiple myeloma | Male   | 15-19 years | 95+ years | -1        | vegetables adjusted (g)                        |
| Multiple myeloma | Male   | 15-19 years | 95+ years | -1        | Healthcare access and quality index            |
| Multiple myeloma | Female | 15-19 years | 95+ years | 1         | Alcohol (liters per capita)                    |
| Multiple myeloma | Female | 15-19 years | 95+ years | 1         | Tobacco (cigarettes per capita)                |
| Multiple myeloma | Female | 15-19 years | 95+ years | -1        | Education (years per capita)                   |
| Multiple myeloma | Female | 15-19 years | 95+ years | 0         | LDI (I\$ per capita)                           |
| Multiple myeloma | Female | 15-19 years | 95+ years | 1         | Mean BMI                                       |
| Multiple myeloma | Female | 15-19 years | 95+ years | -1        | Sanitation (proportion with access)            |
| Multiple myeloma | Female | 15-19 years | 95+ years | 1         | Smoking Prevalence                             |
| Multiple myeloma | Female | 15-19 years | 95+ years | -1        | Improved Water Source (proportion with access) |
| Multiple myeloma | Female | 15-19 years | 95+ years | 0         | Socio-demographic Index                        |
| Multiple myeloma | Female | 15-19 years | 95+ years | -1        | fruits adjusted (g)                            |
| Multiple myeloma | Female | 15-19 years | 95+ years | 1         | red meats adjusted (g)                         |
| Multiple myeloma | Female | 15-19 years | 95+ years | -1        | vegetables adjusted (g)                        |
| Multiple myeloma | Female | 15-19 years | 95+ years | -1        | Healthcare access and quality index            |
| Leukemia         | Female | 0-6 days    | 95+ years | 1         | Alcohol (liters per capita)                    |
| Leukemia         | Female | 0-6 days    | 95+ years | 1         | Tobacco (cigarettes per capita)                |
| Leukemia         | Female | 0-6 days    | 95+ years | 1         | Cumulative Cigarettes (10 Years)               |
| Leukemia         | Female | 0-6 days    | 95+ years | 1         | Cumulative Cigarettes (15 Years)               |
| Leukemia         | Female | 0-6 days    | 95+ years | 1         | Cumulative Cigarettes (20 Years)               |
| Leukemia         | Female | 0-6 days    | 95+ years | 1         | Cumulative Cigarettes (5 Years)                |
| Leukemia         | Female | 0-6 days    | 95+ years | -1        | Education (years per capita)                   |
| Leukemia         | Female | 0-6 days    | 95+ years | -1        | Health System Access 2 (unitless)              |
| Leukemia         | Female | 0-6 days    | 95+ years | 0         | LDI (I\$ per capita)                           |
| Leukemia         | Female | 0-6 days    | 95+ years | 1         | Smoking Prevalence                             |

| Cause           | Sex    | Age start | Age end   | Direction | Covariate                                             |
|-----------------|--------|-----------|-----------|-----------|-------------------------------------------------------|
| Leukemia        | Female | 0-6 days  | 95+ years | 1         | Log-transformed SEV scalar: Leukemia                  |
| Leukemia        | Female | 0-6 days  | 95+ years | 1         | Log-transformed age-standardized SEV scalar: Leukemia |
| Leukemia        | Female | 0-6 days  | 95+ years | 0         | Socio-demographic Index                               |
| Leukemia        | Male   | 0-6 days  | 95+ years | 1         | Alcohol (liters per capita)                           |
| Leukemia        | Male   | 0-6 days  | 95+ years | 1         | Tobacco (cigarettes per capita)                       |
| Leukemia        | Male   | 0-6 days  | 95+ years | 1         | Cumulative Cigarettes (10 Years)                      |
| Leukemia        | Male   | 0-6 days  | 95+ years | 1         | Cumulative Cigarettes (15 Years)                      |
| Leukemia        | Male   | 0-6 days  | 95+ years | 1         | Cumulative Cigarettes (20 Years)                      |
| Leukemia        | Male   | 0-6 days  | 95+ years | 1         | Cumulative Cigarettes (5 Years)                       |
| Leukemia        | Male   | 0-6 days  | 95+ years | -1        | Education (years per capita)                          |
| Leukemia        | Male   | 0-6 days  | 95+ years | -1        | Health System Access 2 (unitless)                     |
| Leukemia        | Male   | 0-6 days  | 95+ years | 0         | LDI (I\$ per capita)                                  |
| Leukemia        | Male   | 0-6 days  | 95+ years | 1         | Smoking Prevalence                                    |
| Leukemia        | Male   | 0-6 days  | 95+ years | 1         | Log-transformed SEV scalar: Leukemia                  |
| Leukemia        | Male   | 0-6 days  | 95+ years | 1         | Log-transformed age-standardized SEV scalar: Leukemia |
| Leukemia        | Male   | 0-6 days  | 95+ years | 0         | Socio-demographic Index                               |
| Leukemia        | Female | 0-6 days  | 95+ years | -1        | Health System Access (capped)                         |
| Leukemia        | Female | 0-6 days  | 95+ years | -1        | Healthcare access and quality index                   |
| Other neoplasms | Male   | 0-6 days  | 95+ years | 1         | Tobacco (cigarettes per capita)                       |
| Other neoplasms | Male   | 0-6 days  | 95+ years | -1        | Education (years per capita)                          |
| Other neoplasms | Male   | 0-6 days  | 95+ years | -1        | Health System Access 2 (unitless)                     |
| Other neoplasms | Male   | 0-6 days  | 95+ years | 0         | LDI (I\$ per capita)                                  |
| Other neoplasms | Male   | 0-6 days  | 95+ years | -1        | Nuts & Seeds (kcal per capita)                        |
| Other neoplasms | Male   | 0-6 days  | 95+ years | 1         | Smoking Prevalence                                    |
| Other neoplasms | Male   | 0-6 days  | 95+ years | 0         | Socio-demographic Index                               |
| Other neoplasms | Male   | 0-6 days  | 95+ years | -1        | fruits adjusted (g)                                   |
| Other neoplasms | Male   | 0-6 days  | 95+ years | -1        | PUFA adjusted (percent)                               |
| Other neoplasms | Male   | 0-6 days  | 95+ years | -1        | vegetables adjusted (g)                               |
| Other neoplasms | Male   | 0-6 days  | 95+ years | -1        | Healthcare access and quality index                   |
| Other neoplasms | Female | 0-6 days  | 95+ years | 1         | Tobacco (cigarettes per capita)                       |

| Cause           | Sex    | Age start | Age end   | Direction | Covariate                           |
|-----------------|--------|-----------|-----------|-----------|-------------------------------------|
| Other neoplasms | Female | 0-6 days  | 95+ years | -1        | Education (years per capita)        |
| Other neoplasms | Female | 0-6 days  | 95+ years | -1        | Health System Access 2 (unitless)   |
| Other neoplasms | Female | 0-6 days  | 95+ years | 0         | LDI (I\$ per capita)                |
| Other neoplasms | Female | 0-6 days  | 95+ years | 1         | Smoking Prevalence                  |
| Other neoplasms | Female | 0-6 days  | 95+ years | 0         | Socio-demographic Index             |
| Other neoplasms | Female | 0-6 days  | 95+ years | -1        | fruits adjusted (g)                 |
| Other neoplasms | Female | 0-6 days  | 95+ years | -1        | nuts seeds adjusted (g)             |
| Other neoplasms | Female | 0-6 days  | 95+ years | -1        | PUFA adjusted (percent)             |
| Other neoplasms | Female | 0-6 days  | 95+ years | -1        | vegetables adjusted (g)             |
| Other neoplasms | Female | 0-6 days  | 95+ years | -1        | Healthcare access and quality index |
| Other neoplasms | Male   | 0-6 days  | 95+ years | -1        | nuts seeds adjusted (g)             |

*eTable 9: Comparison of GBD 2015 and GBD 2016 covariates used and level of covariates*

| Cause             | Sex  | Covariate                                      | GBD 2015 |         |         | GBD 2016 |         |         |
|-------------------|------|------------------------------------------------|----------|---------|---------|----------|---------|---------|
|                   |      |                                                | Level 1  | Level 2 | Level 3 | Level 1  | Level 2 | Level 3 |
| Esophageal cancer | Male | Alcohol (liters per capita)                    | X        |         |         | X        |         |         |
| Esophageal cancer | Male | Tobacco (cigarettes per capita)                | X        |         |         | X        |         |         |
| Esophageal cancer | Male | Education (years per capita)                   |          |         | X       |          |         | X       |
| Esophageal cancer | Male | Fruits (kcal per capita)                       | X        |         |         | X        |         |         |
| Esophageal cancer | Male | LDI (I\$ per capita)                           |          |         | X       |          |         | X       |
| Esophageal cancer | Male | Mean BMI                                       | X        |         |         | X        |         |         |
| Esophageal cancer | Male | Indoor Air Pollution (All Cooking Fuels)       |          | X       |         |          | X       |         |
| Esophageal cancer | Male | Sanitation (proportion with access)            |          | X       |         |          | X       |         |
| Esophageal cancer | Male | Smoking Prevalence                             | X        |         |         | X        |         |         |
| Esophageal cancer | Male | Vegetables (kcal per capita)                   |          | X       |         |          | X       |         |
| Esophageal cancer | Male | Improved Water Source (proportion with access) |          | X       |         |          | X       |         |
| Esophageal cancer | Male | Socio-demographic Index                        |          |         | X       |          | X       |         |

| Cause             | Sex    | Covariate                                      | GBD 2015 |         |         | GBD 2016 |         |         |
|-------------------|--------|------------------------------------------------|----------|---------|---------|----------|---------|---------|
|                   |        |                                                | Level 1  | Level 2 | Level 3 | Level 1  | Level 2 | Level 3 |
| Esophageal cancer | Female | Alcohol (liters per capita)                    | X        |         |         | X        |         |         |
| Esophageal cancer | Female | Tobacco (cigarettes per capita)                | X        |         |         | X        |         |         |
| Esophageal cancer | Female | Education (years per capita)                   |          |         | X       |          |         | X       |
| Esophageal cancer | Female | Fruits (kcal per capita)                       | X        |         |         | X        |         |         |
| Esophageal cancer | Female | LDI (I\$ per capita)                           |          |         | X       |          |         | X       |
| Esophageal cancer | Female | Mean BMI                                       | X        |         |         | X        |         |         |
| Esophageal cancer | Female | Indoor Air Pollution (All Cooking Fuels)       |          | X       |         |          | X       |         |
| Esophageal cancer | Female | Sanitation (proportion with access)            |          | X       |         |          | X       |         |
| Esophageal cancer | Female | Smoking Prevalence                             | X        |         |         | X        |         |         |
| Esophageal cancer | Female | Vegetables (kcal per capita)                   |          | X       |         |          | X       |         |
| Esophageal cancer | Female | Improved Water Source (proportion with access) |          | X       |         |          | X       |         |
| Esophageal cancer | Female | Socio-demographic Index                        |          |         | X       |          |         | X       |
| Esophageal cancer | Female | Socio-demographic Index                        |          |         | X       |          | X       |         |
| Stomach cancer    | Male   | Alcohol (liters per capita)                    | X        |         |         | X        |         |         |
| Stomach cancer    | Male   | Tobacco (cigarettes per capita)                | X        |         |         | X        |         |         |
| Stomach cancer    | Male   | Cumulative Cigarettes (10 Years)               | X        |         |         | X        |         |         |
| Stomach cancer    | Male   | Cumulative Cigarettes (15 Years)               | X        |         |         | X        |         |         |
| Stomach cancer    | Male   | LDI (I\$ per capita)                           |          |         | X       |          |         | X       |
| Stomach cancer    | Male   | Mean BMI                                       |          | X       |         |          | X       |         |
| Stomach cancer    | Male   | Indoor Air Pollution (All Cooking Fuels)       |          | X       |         |          | X       |         |
| Stomach cancer    | Male   | Outdoor Air Pollution (PM2.5)                  |          | X       |         |          | X       |         |
| Stomach cancer    | Male   | Sanitation (proportion with access)            |          | X       |         |          | X       |         |
| Stomach cancer    | Male   | Smoking Prevalence                             | X        |         |         | X        |         |         |
| Stomach cancer    | Male   | Improved Water Source (proportion with access) |          | X       |         |          | X       |         |
| Stomach cancer    | Male   | Log-transformed SEV scalar: Stomach C          | X        |         |         | X        |         |         |

| Cause          | Sex    | Covariate                                         | GBD 2015 |         |         | GBD 2016 |         |         |
|----------------|--------|---------------------------------------------------|----------|---------|---------|----------|---------|---------|
|                |        |                                                   | Level 1  | Level 2 | Level 3 | Level 1  | Level 2 | Level 3 |
| Stomach cancer | Male   | Socio-demographic Index                           |          |         | X       |          |         | X       |
| Stomach cancer | Female | Alcohol (liters per capita)                       | X        |         |         | X        |         |         |
| Stomach cancer | Female | Tobacco (cigarettes per capita)                   | X        |         |         | X        |         |         |
| Stomach cancer | Female | Cumulative Cigarettes (10 Years)                  | X        |         |         | X        |         |         |
| Stomach cancer | Female | Education (years per capita)                      |          |         | X       |          |         | X       |
| Stomach cancer | Female | LDI (I\$ per capita)                              |          |         | X       |          |         | X       |
| Stomach cancer | Female | Mean BMI                                          |          | X       |         |          | X       |         |
| Stomach cancer | Female | Indoor Air Pollution (All Cooking Fuels)          |          | X       |         |          | X       |         |
| Stomach cancer | Female | Outdoor Air Pollution (PM2.5)                     |          | X       |         |          | X       |         |
| Stomach cancer | Female | Sanitation (proportion with access)               |          | X       |         |          | X       |         |
| Stomach cancer | Female | Smoking Prevalence                                | X        |         |         | X        |         |         |
| Stomach cancer | Female | Improved Water Source (proportion with access)    |          | X       |         |          | X       |         |
| Stomach cancer | Female | Log-transformed SEV scalar: Stomach C             | X        |         |         | X        |         |         |
| Stomach cancer | Female | Socio-demographic Index                           |          |         | X       |          |         | X       |
| Liver cancer   | Male   | Cumulative Cigarettes (15 Years)                  | X        |         |         | X        |         |         |
| Liver cancer   | Male   | Tobacco (cigarettes per capita)                   | X        |         |         | X        |         |         |
| Liver cancer   | Male   | Education (years per capita)                      |          |         | X       |          |         | X       |
| Liver cancer   | Male   | LDI (I\$ per capita)                              |          |         | X       |          |         | X       |
| Liver cancer   | Male   | Cumulative Cigarettes (20 Years)                  | X        |         |         | X        |         |         |
| Liver cancer   | Male   | Diabetes Age-Standardized Prevalence (proportion) |          | X       |         |          | X       |         |
| Liver cancer   | Male   | Mean BMI                                          |          | X       |         |          | X       |         |
| Liver cancer   | Male   | Alcohol (liters per capita)                       | X        |         |         | X        |         |         |
| Liver cancer   | Male   | Log-transformed SEV scalar: Liver C               | X        |         |         | X        |         |         |
| Liver cancer   | Male   | Socio-demographic Index                           |          |         | X       |          |         | X       |
| Liver cancer   | Female | Cumulative Cigarettes (15 Years)                  | X        |         |         | X        |         |         |

| Cause         | Sex    | Covariate                                           | GBD 2015 |         |         | GBD 2016 |         |         |
|---------------|--------|-----------------------------------------------------|----------|---------|---------|----------|---------|---------|
|               |        |                                                     | Level 1  | Level 2 | Level 3 | Level 1  | Level 2 | Level 3 |
| Liver cancer  | Female | Tobacco (cigarettes per capita)                     | X        |         |         | X        |         |         |
| Liver cancer  | Female | Education (years per capita)                        |          |         | X       |          |         | X       |
| Liver cancer  | Female | LDI (I\$ per capita)                                |          |         | X       |          |         | X       |
| Liver cancer  | Female | Cumulative Cigarettes (20 Years)                    | X        |         |         | X        |         |         |
| Liver cancer  | Female | Diabetes Age-Standardized Prevalence (proportion)   |          | X       |         |          | X       |         |
| Liver cancer  | Female | Mean BMI                                            |          | X       |         |          | X       |         |
| Liver cancer  | Female | Alcohol (liters per capita)                         | X        |         |         | X        |         |         |
| Liver cancer  | Female | Log-transformed SEV scalar: Liver C                 | X        |         |         | X        |         |         |
| Liver cancer  | Female | Socio-demographic Index                             |          |         | X       |          |         | X       |
| Larynx cancer | Male   | Cumulative Cigarettes (10 Years)                    |          | X       |         |          | X       |         |
| Larynx cancer | Male   | Cumulative Cigarettes (15 Years)                    |          | X       |         |          | X       |         |
| Larynx cancer | Male   | Cumulative Cigarettes (20 Years)                    |          | X       |         |          | X       |         |
| Larynx cancer | Male   | Cumulative Cigarettes (5 Years)                     |          | X       |         |          | X       |         |
| Larynx cancer | Male   | Tobacco (cigarettes per capita)                     |          | X       |         |          | X       |         |
| Larynx cancer | Male   | Education (years per capita)                        |          |         | X       |          |         | X       |
| Larynx cancer | Male   | Log-transformed SEV scalar: Larynx C                | X        |         |         | X        |         |         |
| Larynx cancer | Male   | LDI (I\$ per capita)                                |          |         | X       |          |         | X       |
| Larynx cancer | Male   | Smoking Prevalence                                  |          | X       |         |          | X       |         |
| Larynx cancer | Male   | Alcohol (liters per capita)                         | X        |         |         | X        |         |         |
| Larynx cancer | Male   | Population Density (under 150 ppl/sqkm, proportion) |          | X       |         |          | X       |         |
| Larynx cancer | Male   | Population Density (over 1000 ppl/sqkm, proportion) |          | X       |         |          | X       |         |
| Larynx cancer | Male   | Socio-demographic Index                             |          |         | X       |          |         | X       |
| Larynx cancer | Female | Cumulative Cigarettes (10 Years)                    |          | X       |         |          | X       |         |
| Larynx cancer | Female | Cumulative Cigarettes (15 Years)                    |          | X       |         |          | X       |         |
| Larynx cancer | Female | Cumulative Cigarettes (20 Years)                    |          | X       |         |          | X       |         |

| Cause                               | Sex    | Covariate                                           | GBD 2015 |         |         | GBD 2016 |         |         |
|-------------------------------------|--------|-----------------------------------------------------|----------|---------|---------|----------|---------|---------|
|                                     |        |                                                     | Level 1  | Level 2 | Level 3 | Level 1  | Level 2 | Level 3 |
| Larynx cancer                       | Female | Cumulative Cigarettes (5 Years)                     |          | X       |         |          | X       |         |
| Larynx cancer                       | Female | Tobacco (cigarettes per capita)                     |          | X       |         |          | X       |         |
| Larynx cancer                       | Female | Education (years per capita)                        |          |         | X       |          |         | X       |
| Larynx cancer                       | Female | Log-transformed SEV scalar: Larynx C                | X        |         |         | X        |         |         |
| Larynx cancer                       | Female | LDI (I\$ per capita)                                |          |         | X       |          |         | X       |
| Larynx cancer                       | Female | Smoking Prevalence                                  |          | X       |         |          | X       |         |
| Larynx cancer                       | Female | Alcohol (liters per capita)                         | X        |         |         | X        |         |         |
| Larynx cancer                       | Female | Population Density (under 150 ppl/sqkm, proportion) |          | X       |         |          | X       |         |
| Larynx cancer                       | Female | Population Density (over 1000 ppl/sqkm, proportion) |          | X       |         |          | X       |         |
| Larynx cancer                       | Female | Socio-demographic Index                             |          |         | X       |          |         | X       |
| Tracheal, bronchus, and lung cancer | Male   | Tobacco (cigarettes per capita)                     | X        |         |         | X        |         |         |
| Tracheal, bronchus, and lung cancer | Male   | Cumulative Cigarettes (10 Years)                    | X        |         |         | X        |         |         |
| Tracheal, bronchus, and lung cancer | Male   | Cumulative Cigarettes (15 Years)                    | X        |         |         | X        |         |         |
| Tracheal, bronchus, and lung cancer | Male   | Cumulative Cigarettes (20 Years)                    | X        |         |         | X        |         |         |
| Tracheal, bronchus, and lung cancer | Male   | Cumulative Cigarettes (5 Years)                     | X        |         |         | X        |         |         |
| Tracheal, bronchus, and lung cancer | Male   | Education (years per capita)                        |          |         | X       |          |         | X       |
| Tracheal, bronchus, and lung cancer | Male   | LDI (I\$ per capita)                                |          |         | X       |          |         | X       |
| Tracheal, bronchus, and lung cancer | Male   | Indoor Air Pollution (All Cooking Fuels)            |          | X       |         |          | X       |         |
| Tracheal, bronchus, and lung cancer | Male   | Outdoor Air Pollution (PM2.5)                       |          | X       |         |          | X       |         |



| Cause                               | Sex    | Covariate                                | GBD 2015 |         |         | GBD 2016 |         |         |
|-------------------------------------|--------|------------------------------------------|----------|---------|---------|----------|---------|---------|
|                                     |        |                                          | Level 1  | Level 2 | Level 3 | Level 1  | Level 2 | Level 3 |
| lung cancer                         |        |                                          |          |         |         |          |         |         |
| Tracheal, bronchus, and lung cancer | Male   | Smoking Prevalence                       | X        |         |         | X        |         |         |
| Tracheal, bronchus, and lung cancer | Male   | Socio-demographic Index                  |          |         | X       |          |         | X       |
| Tracheal, bronchus, and lung cancer | Female | Tobacco (cigarettes per capita)          | X        |         |         | X        |         |         |
| Tracheal, bronchus, and lung cancer | Female | Cumulative Cigarettes (10 Years)         | X        |         |         | X        |         |         |
| Tracheal, bronchus, and lung cancer | Female | Cumulative Cigarettes (15 Years)         | X        |         |         | X        |         |         |
| Tracheal, bronchus, and lung cancer | Female | Cumulative Cigarettes (20 Years)         | X        |         |         | X        |         |         |
| Tracheal, bronchus, and lung cancer | Female | Cumulative Cigarettes (5 Years)          | X        |         |         | X        |         |         |
| Tracheal, bronchus, and lung cancer | Female | Education (years per capita)             |          |         | X       |          |         | X       |
| Tracheal, bronchus, and lung cancer | Female | LDI (I\$ per capita)                     |          |         | X       |          |         | X       |
| Tracheal, bronchus, and lung cancer | Female | Indoor Air Pollution (All Cooking Fuels) |          | X       |         |          | X       |         |
| Tracheal, bronchus, and lung cancer | Female | Outdoor Air Pollution (PM2.5)            |          | X       |         |          | X       |         |
| Tracheal, bronchus, and lung cancer | Female | Smoking Prevalence                       | X        |         |         | X        |         |         |
| Tracheal, bronchus, and lung cancer | Female | Socio-demographic Index                  |          |         | X       |          |         | X       |
| Breast cancer                       | Male   | Cumulative Cigarettes (10 Years)         |          | X       |         |          | X       |         |
| Breast cancer                       | Male   | Alcohol (liters per capita)              | X        |         |         | X        |         |         |
| Breast cancer                       | Male   | Education (years per capita)             |          |         | X       |          |         | X       |

| Cause           | Sex    | Covariate                            | GBD 2015 |         |         | GBD 2016 |         |         |
|-----------------|--------|--------------------------------------|----------|---------|---------|----------|---------|---------|
|                 |        |                                      | Level 1  | Level 2 | Level 3 | Level 1  | Level 2 | Level 3 |
| Breast cancer   | Male   | LDI (I\$ per capita)                 |          |         | X       |          |         | X       |
| Breast cancer   | Male   | Log-transformed SEV scalar: Breast C | X        |         |         | X        |         |         |
| Breast cancer   | Male   | Socio-demographic Index              |          |         | X       |          |         | X       |
| Breast cancer   | Male   | Mean BMI                             | X        |         |         | X        |         |         |
| Breast cancer   | Female | Cumulative Cigarettes (10 Years)     |          | X       |         |          | X       |         |
| Breast cancer   | Female | Alcohol (liters per capita)          | X        |         |         | X        |         |         |
| Breast cancer   | Female | Education (years per capita)         |          |         | X       |          |         | X       |
| Breast cancer   | Female | LDI (I\$ per capita)                 |          |         | X       |          |         | X       |
| Breast cancer   | Female | Log-transformed SEV scalar: Breast C | X        |         |         | X        |         |         |
| Breast cancer   | Female | Socio-demographic Index              |          |         | X       |          |         | X       |
| Breast cancer   | Female | Mean BMI                             | X        |         |         | X        |         |         |
| Breast cancer   | Female | Total Fertility Rate                 |          | X       |         |          | X       |         |
| Cervical cancer | Female | Abortion On-Demand Illegal (binary)  | X        |         |         | X        |         |         |
| Cervical cancer | Female | Cumulative Cigarettes (10 Years)     | X        |         |         | X        |         |         |
| Cervical cancer | Female | Cumulative Cigarettes (15 Years)     | X        |         |         | X        |         |         |
| Cervical cancer | Female | Cumulative Cigarettes (5 Years)      | X        |         |         | X        |         |         |
| Cervical cancer | Female | Education (years per capita)         |          |         | X       |          |         | X       |
| Cervical cancer | Female | Health System Access 2 (unitless)    |          | X       |         |          | X       |         |
| Cervical cancer | Female | LDI (I\$ per capita)                 |          |         | X       |          |         | X       |
| Cervical cancer | Female | Smoking Prevalence                   |          | X       |         |          | X       |         |
| Cervical cancer | Female | Total Fertility Rate                 |          | X       |         |          | X       |         |
| Cervical cancer | Female | Socio-demographic Index              |          |         | X       |          |         | X       |
| Cervical cancer | Female | HIV age-standardized prevalence      | X        |         |         | X        |         |         |
| Uterine cancer  | Female | Cumulative Cigarettes (10 Years)     |          | X       |         |          | X       |         |
| Uterine cancer  | Female | Cumulative Cigarettes (5 Years)      |          | X       |         |          | X       |         |
| Uterine cancer  | Female | Tobacco (cigarettes per capita)      |          | X       |         |          | X       |         |
| Uterine cancer  | Female | Education (years per capita)         |          |         | X       |          |         | X       |

| Cause                   | Sex    | Covariate                                         | GBD 2015 |         |         | GBD 2016 |         |         |
|-------------------------|--------|---------------------------------------------------|----------|---------|---------|----------|---------|---------|
|                         |        |                                                   | Level 1  | Level 2 | Level 3 | Level 1  | Level 2 | Level 3 |
| Uterine cancer          | Female | Health System Access (unitless)                   |          | X       |         |          | X       |         |
| Uterine cancer          | Female | Diabetes Age-Standardized Prevalence (proportion) |          | X       |         |          | X       |         |
| Uterine cancer          | Female | Smoking Prevalence                                |          | X       |         |          | X       |         |
| Uterine cancer          | Female | Mean BMI                                          | X        |         |         | X        |         |         |
| Uterine cancer          | Female | Total Fertility Rate                              |          | X       |         |          | X       |         |
| Uterine cancer          | Female | Socio-demographic Index                           |          |         | X       |          |         | X       |
| Uterine cancer          | Female | LDI (I\$ per capita)                              |          |         | X       |          |         | X       |
| Uterine cancer          | Female | Log-transformed SEV scalar: Uterus C              | X        |         |         | X        |         |         |
| Prostate cancer         | Male   | Socio-demographic Index                           |          |         | X       |          |         | X       |
| Prostate cancer         | Male   | Log-transformed SEV scalar: Prostate C            | X        |         |         | X        |         |         |
| Prostate cancer         | Male   | Education (years per capita)                      |          |         | X       |          |         | X       |
| Prostate cancer         | Male   | LDI (I\$ per capita)                              |          |         | X       |          |         | X       |
| Colon and rectum cancer | Male   | Alcohol (liters per capita)                       | X        |         |         | X        |         |         |
| Colon and rectum cancer | Male   | Tobacco (cigarettes per capita)                   | X        |         |         | X        |         |         |
| Colon and rectum cancer | Male   | Diabetes Age-Standardized Prevalence (proportion) |          | X       |         |          | X       |         |
| Colon and rectum cancer | Male   | Education (years per capita)                      |          |         | X       |          |         | X       |
| Colon and rectum cancer | Male   | Health System Access 2 (unitless)                 |          | X       |         |          | X       |         |
| Colon and rectum cancer | Male   | LDI (I\$ per capita)                              |          |         | X       |          |         | X       |
| Colon and rectum cancer | Male   | Mean BMI                                          | X        |         |         | X        |         |         |
| Colon and rectum cancer | Male   | Smoking Prevalence                                | X        |         |         | X        |         |         |
| Colon and rectum cancer | Male   | Log-transformed SEV scalar: Colorect C            | X        |         |         | X        |         |         |
| Colon and rectum cancer | Male   | Socio-demographic Index                           |          |         | X       |          |         | X       |
| Colon and rectum cancer | Female | Alcohol (liters per capita)                       | X        |         |         | X        |         |         |
| Colon and rectum cancer | Female | Tobacco (cigarettes per capita)                   |          | X       |         |          | X       |         |
| Colon and rectum cancer | Female | Diabetes Age-Standardized Prevalence (proportion) |          | X       |         |          | X       |         |

| Cause                      | Sex    | Covariate                              | GBD 2015 |         |         | GBD 2016 |         |         |
|----------------------------|--------|----------------------------------------|----------|---------|---------|----------|---------|---------|
|                            |        |                                        | Level 1  | Level 2 | Level 3 | Level 1  | Level 2 | Level 3 |
| Colon and rectum cancer    | Female | Education (years per capita)           |          |         | X       |          |         | X       |
| Colon and rectum cancer    | Female | Health System Access 2 (unitless)      |          | X       |         |          | X       |         |
| Colon and rectum cancer    | Female | LDI (I\$ per capita)                   |          |         | X       |          |         | X       |
| Colon and rectum cancer    | Female | Mean BMI                               | X        |         |         | X        |         |         |
| Colon and rectum cancer    | Female | Smoking Prevalence                     |          | X       |         |          | X       |         |
| Colon and rectum cancer    | Female | Log-transformed SEV scalar: Colorect C | X        |         |         | X        |         |         |
| Colon and rectum cancer    | Female | Socio-demographic Index                |          |         | X       |          |         | X       |
| Lip and oral cavity cancer | Male   | Alcohol (liters per capita)            | X        |         |         | X        |         |         |
| Lip and oral cavity cancer | Male   | Cumulative Cigarettes (10 Years)       | X        |         |         | X        |         |         |
| Lip and oral cavity cancer | Male   | Cumulative Cigarettes (20 Years)       | X        |         |         | X        |         |         |
| Lip and oral cavity cancer | Male   | Education (years per capita)           |          |         | X       |          |         | X       |
| Lip and oral cavity cancer | Male   | Health System Access 2 (unitless)      |          | X       |         |          | X       |         |
| Lip and oral cavity cancer | Male   | LDI (I\$ per capita)                   |          |         | X       |          |         | X       |
| Lip and oral cavity cancer | Male   | Smoking Prevalence                     | X        |         |         | X        |         |         |
| Lip and oral cavity cancer | Male   | Log-transformed SEV scalar: Mouth C    | X        |         |         | X        |         |         |
| Lip and oral cavity cancer | Male   | Socio-demographic Index                |          |         | X       |          |         | X       |
| Lip and oral cavity cancer | Female | Alcohol (liters per capita)            | X        |         |         | X        |         |         |
| Lip and oral cavity cancer | Female | Cumulative Cigarettes (10 Years)       | X        |         |         | X        |         |         |
| Lip and oral cavity cancer | Female | Cumulative Cigarettes (20 Years)       | X        |         |         | X        |         |         |
| Lip and oral cavity cancer | Female | Education (years per capita)           |          |         | X       |          |         | X       |
| Lip and oral cavity cancer | Female | Fruits (kcal per capita)               |          | X       |         |          | X       |         |
| Lip and oral cavity cancer | Female | Health System Access 2 (unitless)      |          | X       |         |          | X       |         |
| Lip and oral cavity cancer | Female | LDI (I\$ per capita)                   |          |         | X       |          |         | X       |
| Lip and oral cavity cancer | Female | Red Meat (kcal per capita)             |          | X       |         |          | X       |         |
| Lip and oral cavity cancer | Female | Smoking Prevalence                     | X        |         |         | X        |         |         |
| Lip and oral cavity cancer | Female | Vegetables (kcal per capita)           | X        |         |         | X        |         |         |
| Lip and oral cavity cancer | Female | Socio-demographic Index                |          |         | X       |          |         | X       |

| Cause                | Sex    | Covariate                                           | GBD 2015 |         |         | GBD 2016 |         |         |
|----------------------|--------|-----------------------------------------------------|----------|---------|---------|----------|---------|---------|
|                      |        |                                                     | Level 1  | Level 2 | Level 3 | Level 1  | Level 2 | Level 3 |
| Nasopharynx cancer   | Male   | Alcohol (liters per capita)                         | X        |         |         | X        |         |         |
| Nasopharynx cancer   | Male   | Education (years per capita)                        |          |         | X       |          |         | X       |
| Nasopharynx cancer   | Male   | Health System Access 2 (unitless)                   |          | X       |         |          | X       |         |
| Nasopharynx cancer   | Male   | LDI (I\$ per capita)                                |          |         | X       |          |         | X       |
| Nasopharynx cancer   | Male   | Population Density (over 1000 ppl/sqkm, proportion) |          | X       |         |          | X       |         |
| Nasopharynx cancer   | Male   | Population Density (under 150 ppl/sqkm, proportion) |          | X       |         |          | X       |         |
| Nasopharynx cancer   | Male   | Log-transformed SEV scalar: Nasoph C                | X        |         |         | X        |         |         |
| Nasopharynx cancer   | Male   | Socio-demographic Index                             |          |         | X       |          |         | X       |
| Nasopharynx cancer   | Female | Alcohol (liters per capita)                         | X        |         |         | X        |         |         |
| Nasopharynx cancer   | Female | Education (years per capita)                        |          |         | X       |          |         | X       |
| Nasopharynx cancer   | Female | Health System Access 2 (unitless)                   |          | X       |         |          | X       |         |
| Nasopharynx cancer   | Female | LDI (I\$ per capita)                                |          |         | X       |          |         | X       |
| Nasopharynx cancer   | Female | Population Density (over 1000 ppl/sqkm, proportion) |          | X       |         |          | X       |         |
| Nasopharynx cancer   | Female | Population Density (under 150 ppl/sqkm, proportion) |          | X       |         |          | X       |         |
| Nasopharynx cancer   | Female | Log-transformed SEV scalar: Nasoph C                | X        |         |         | X        |         |         |
| Nasopharynx cancer   | Female | Socio-demographic Index                             |          |         | X       |          |         | X       |
| Other pharynx cancer | Male   | Alcohol (liters per capita)                         | X        |         |         | X        |         |         |
| Other pharynx cancer | Male   | Cumulative Cigarettes (5 Years)                     |          | X       |         |          | X       |         |
| Other pharynx cancer | Male   | Education (years per capita)                        |          |         | X       |          |         | X       |
| Other pharynx cancer | Male   | LDI (I\$ per capita)                                |          |         | X       |          |         | X       |
| Other pharynx cancer | Male   | Population Density (over 1000 ppl/sqkm, proportion) |          | X       |         |          | X       |         |
| Other pharynx cancer | Male   | Population Density (under 150 ppl/sqkm, proportion) |          | X       |         |          | X       |         |

| Cause                                | Sex    | Covariate                                           | GBD 2015 |         |         | GBD 2016 |         |         |
|--------------------------------------|--------|-----------------------------------------------------|----------|---------|---------|----------|---------|---------|
|                                      |        |                                                     | Level 1  | Level 2 | Level 3 | Level 1  | Level 2 | Level 3 |
| Other pharynx cancer                 | Male   | Smoking Prevalence                                  | X        |         |         | X        |         |         |
| Other pharynx cancer                 | Male   | Health System Access (capped)                       |          | X       |         |          | X       |         |
| Other pharynx cancer                 | Male   | Log-transformed SEV scalar: Oth Phar C              | X        |         |         | X        |         |         |
| Other pharynx cancer                 | Male   | Socio-demographic Index                             |          |         | X       |          |         | X       |
| Other pharynx cancer                 | Female | Alcohol (liters per capita)                         | X        |         |         | X        |         |         |
| Other pharynx cancer                 | Female | Cumulative Cigarettes (5 Years)                     |          | X       |         |          | X       |         |
| Other pharynx cancer                 | Female | Education (years per capita)                        |          |         | X       |          |         | X       |
| Other pharynx cancer                 | Female | LDI (I\$ per capita)                                |          |         | X       |          |         | X       |
| Other pharynx cancer                 | Female | Population Density (over 1000 ppl/sqkm, proportion) |          | X       |         |          | X       |         |
| Other pharynx cancer                 | Female | Population Density (under 150 ppl/sqkm, proportion) |          | X       |         |          | X       |         |
| Other pharynx cancer                 | Female | Smoking Prevalence                                  | X        |         |         | X        |         |         |
| Other pharynx cancer                 | Female | Health System Access (capped)                       |          | X       |         |          | X       |         |
| Other pharynx cancer                 | Female | Log-transformed SEV scalar: Oth Phar C              | X        |         |         | X        |         |         |
| Other pharynx cancer                 | Female | Socio-demographic Index                             |          |         | X       |          |         | X       |
| Gallbladder and biliary tract cancer | Female | Cumulative Cigarettes (10 Years)                    |          | X       |         |          | X       |         |
| Gallbladder and biliary tract cancer | Female | Cumulative Cigarettes (5 Years)                     |          | X       |         |          | X       |         |
| Gallbladder and biliary tract cancer | Female | Tobacco (cigarettes per capita)                     |          | X       |         |          | X       |         |
| Gallbladder and biliary tract cancer | Female | Education (years per capita)                        |          |         | X       |          |         | X       |
| Gallbladder and biliary tract cancer | Female | Health System Access (capped)                       |          | X       |         |          | X       |         |
| Gallbladder and biliary tract cancer | Female | LDI (I\$ per capita)                                |          |         | X       |          |         | X       |
| Gallbladder and biliary tract        | Female | Log-transformed SEV scalar: Gallblad C              | X        |         |         | X        |         |         |

| Cause                                | Sex    | Covariate                                         | GBD 2015 |         |         | GBD 2016 |         |         |
|--------------------------------------|--------|---------------------------------------------------|----------|---------|---------|----------|---------|---------|
|                                      |        |                                                   | Level 1  | Level 2 | Level 3 | Level 1  | Level 2 | Level 3 |
| cancer                               |        |                                                   |          |         |         |          |         |         |
| Gallbladder and biliary tract cancer | Female | Diabetes Age-Standardized Prevalence (proportion) |          | X       |         |          | X       |         |
| Gallbladder and biliary tract cancer | Female | Smoking Prevalence                                |          | X       |         |          | X       |         |
| Gallbladder and biliary tract cancer | Female | Alcohol (liters per capita)                       |          | X       |         |          | X       |         |
| Gallbladder and biliary tract cancer | Female | Mean BMI                                          | X        |         |         | X        |         |         |
| Gallbladder and biliary tract cancer | Female | Socio-demographic Index                           |          |         | X       |          |         | X       |
| Gallbladder and biliary tract cancer | Male   | Cumulative Cigarettes (10 Years)                  |          | X       |         |          | X       |         |
| Gallbladder and biliary tract cancer | Male   | Cumulative Cigarettes (5 Years)                   |          | X       |         |          | X       |         |
| Gallbladder and biliary tract cancer | Male   | Tobacco (cigarettes per capita)                   |          | X       |         |          | X       |         |
| Gallbladder and biliary tract cancer | Male   | Education (years per capita)                      |          |         | X       |          |         | X       |
| Gallbladder and biliary tract cancer | Male   | Health System Access (capped)                     |          | X       |         |          | X       |         |
| Gallbladder and biliary tract cancer | Male   | LDI (I\$ per capita)                              |          |         | X       |          |         | X       |
| Gallbladder and biliary tract cancer | Male   | Log-transformed SEV scalar: Gallblad C            | X        |         |         | X        |         |         |
| Gallbladder and biliary tract cancer | Male   | Diabetes Age-Standardized Prevalence (proportion) |          | X       |         |          | X       |         |
| Gallbladder and biliary tract cancer | Male   | Smoking Prevalence                                |          | X       |         |          | X       |         |
| Gallbladder and biliary tract        | Male   | Alcohol (liters per capita)                       |          | X       |         |          | X       |         |

| Cause                                | Sex    | Covariate                                         | GBD 2015 |         |         | GBD 2016 |         |         |
|--------------------------------------|--------|---------------------------------------------------|----------|---------|---------|----------|---------|---------|
|                                      |        |                                                   | Level 1  | Level 2 | Level 3 | Level 1  | Level 2 | Level 3 |
| cancer                               |        |                                                   |          |         |         |          |         |         |
| Gallbladder and biliary tract cancer | Male   | Mean BMI                                          | X        |         |         | X        |         |         |
| Gallbladder and biliary tract cancer | Male   | Socio-demographic Index                           |          |         | X       |          |         | X       |
| Pancreatic cancer                    | Male   | Cumulative Cigarettes (10 Years)                  | X        |         |         | X        |         |         |
| Pancreatic cancer                    | Male   | Total Calories (kcal per capita)                  |          | X       |         |          | X       |         |
| Pancreatic cancer                    | Male   | Cumulative Cigarettes (20 Years)                  | X        |         |         | X        |         |         |
| Pancreatic cancer                    | Male   | Cumulative Cigarettes (5 Years)                   |          | X       |         |          | X       |         |
| Pancreatic cancer                    | Male   | Tobacco (cigarettes per capita)                   | X        |         |         | X        |         |         |
| Pancreatic cancer                    | Male   | Education (years per capita)                      |          |         | X       |          |         | X       |
| Pancreatic cancer                    | Male   | Log-transformed SEV scalar: Pancreas C            | X        |         |         | X        |         |         |
| Pancreatic cancer                    | Male   | Diabetes Age-Standardized Prevalence (proportion) |          | X       |         |          | X       |         |
| Pancreatic cancer                    | Male   | Smoking Prevalence                                | X        |         |         | X        |         |         |
| Pancreatic cancer                    | Male   | Alcohol (liters per capita)                       | X        |         |         | X        |         |         |
| Pancreatic cancer                    | Male   | Mean BMI                                          | X        |         |         | X        |         |         |
| Pancreatic cancer                    | Male   | Socio-demographic Index                           |          |         | X       |          |         | X       |
| Pancreatic cancer                    | Male   | LDI (I\$ per capita)                              |          |         | X       |          |         | X       |
| Pancreatic cancer                    | Female | Cumulative Cigarettes (10 Years)                  | X        |         |         | X        |         |         |
| Pancreatic cancer                    | Female | Cumulative Cigarettes (20 Years)                  | X        |         |         | X        |         |         |
| Pancreatic cancer                    | Female | Cumulative Cigarettes (5 Years)                   | X        |         |         | X        |         |         |
| Pancreatic cancer                    | Female | Tobacco (cigarettes per capita)                   | X        |         |         | X        |         |         |
| Pancreatic cancer                    | Female | Education (years per capita)                      |          |         | X       |          |         | X       |
| Pancreatic cancer                    | Female | Log-transformed SEV scalar: Pancreas C            | X        |         |         | X        |         |         |
| Pancreatic cancer                    | Female | Diabetes Age-Standardized Prevalence (proportion) |          | X       |         |          | X       |         |
| Pancreatic cancer                    | Female | Smoking Prevalence                                | X        |         |         | X        |         |         |



| Cause                    | Sex    | Covariate                        | GBD 2015 |         |         | GBD 2016 |         |         |
|--------------------------|--------|----------------------------------|----------|---------|---------|----------|---------|---------|
|                          |        |                                  | Level 1  | Level 2 | Level 3 | Level 1  | Level 2 | Level 3 |
| Pancreatic cancer        | Female | Alcohol (liters per capita)      |          | X       |         |          | X       |         |
| Pancreatic cancer        | Female | Mean BMI                         | X        |         |         | X        |         |         |
| Pancreatic cancer        | Female | Socio-demographic Index          |          |         | X       |          |         | X       |
| Pancreatic cancer        | Female | LDI (I\$ per capita)             |          |         | X       |          |         | X       |
| Malignant skin melanoma  | Male   | Education (years per capita)     |          |         | X       |          |         | X       |
| Malignant skin melanoma  | Male   | LDI (I\$ per capita)             |          |         | X       |          |         | X       |
| Malignant skin melanoma  | Male   | Alcohol (liters per capita)      | X        |         |         |          | X       |         |
| Malignant skin melanoma  | Male   | Alcohol (liters per capita)      | X        |         |         | X        |         |         |
| Malignant skin melanoma  | Male   | Latitude 15 to 30 (proportion)   |          | X       |         |          | X       |         |
| Malignant skin melanoma  | Male   | Latitude Over 45 (proportion)    |          | X       |         |          | X       |         |
| Malignant skin melanoma  | Male   | Latitude 30 to 45 (proportion)   |          | X       |         |          | X       |         |
| Malignant skin melanoma  | Male   | Socio-demographic Index          |          |         | X       |          |         | X       |
| Malignant skin melanoma  | Female | Education (years per capita)     |          |         | X       |          |         | X       |
| Malignant skin melanoma  | Female | LDI (I\$ per capita)             |          |         | X       |          |         | X       |
| Malignant skin melanoma  | Female | Alcohol (liters per capita)      | X        |         |         | X        |         |         |
| Malignant skin melanoma  | Female | Latitude 15 to 30 (proportion)   |          | X       |         |          | X       |         |
| Malignant skin melanoma  | Female | Latitude Over 45 (proportion)    |          | X       |         |          | X       |         |
| Malignant skin melanoma  | Female | Latitude 30 to 45 (proportion)   |          | X       |         |          | X       |         |
| Malignant skin melanoma  | Female | Socio-demographic Index          |          |         | X       |          |         | X       |
| Non-melanoma skin cancer | Female | Cumulative Cigarettes (10 Years) | X        |         |         | X        |         |         |
| Non-melanoma skin cancer | Female | Cumulative Cigarettes (15 Years) | X        |         |         | X        |         |         |
| Non-melanoma skin cancer | Female | Socio-demographic Index          |          |         | X       |          |         | X       |
| Non-melanoma skin cancer | Female | Cumulative Cigarettes (5 Years)  | X        |         |         | X        |         |         |
| Non-melanoma skin cancer | Female | Education (years per capita)     |          |         | X       |          |         | X       |
| Non-melanoma skin cancer | Female | Health System Access (capped)    | X        |         |         |          | X       |         |
| Non-melanoma skin cancer | Female | LDI (I\$ per capita)             |          |         | X       |          |         | X       |
| Non-melanoma skin cancer | Female | Average latitude                 |          | X       |         |          | X       |         |

| Cause                    | Sex    | Covariate                                         | GBD 2015 |         |         | GBD 2016 |         |         |
|--------------------------|--------|---------------------------------------------------|----------|---------|---------|----------|---------|---------|
|                          |        |                                                   | Level 1  | Level 2 | Level 3 | Level 1  | Level 2 | Level 3 |
| Non-melanoma skin cancer | Female | Smoking Prevalence                                | X        |         |         | X        |         |         |
| Non-melanoma skin cancer | Male   | Cumulative Cigarettes (10 Years)                  | X        |         |         | X        |         |         |
| Non-melanoma skin cancer | Male   | Cumulative Cigarettes (15 Years)                  | X        |         |         | X        |         |         |
| Non-melanoma skin cancer | Male   | Socio-demographic Index                           |          |         | X       |          |         | X       |
| Non-melanoma skin cancer | Male   | Cumulative Cigarettes (5 Years)                   | X        |         |         | X        |         |         |
| Non-melanoma skin cancer | Male   | Education (years per capita)                      |          |         | X       |          |         | X       |
| Non-melanoma skin cancer | Male   | Health System Access (capped)                     | X        |         |         |          | X       |         |
| Non-melanoma skin cancer | Male   | LDI (I\$ per capita)                              |          |         | X       |          |         | X       |
| Non-melanoma skin cancer | Male   | Average latitude                                  |          | X       |         |          | X       |         |
| Non-melanoma skin cancer | Male   | Smoking Prevalence                                | X        |         |         | X        |         |         |
| Ovarian cancer           | Female | Cumulative Cigarettes (20 Years)                  | X        |         |         | X        |         |         |
| Ovarian cancer           | Female | Smoking Prevalence                                |          | X       |         |          | X       |         |
| Ovarian cancer           | Female | Tobacco (cigarettes per capita)                   | X        |         |         | X        |         |         |
| Ovarian cancer           | Female | Contraception (Modern) Prevalence (proportion)    | X        |         |         | X        |         |         |
| Ovarian cancer           | Female | LDI (I\$ per capita)                              |          |         | X       |          |         | X       |
| Ovarian cancer           | Female | Alcohol (liters per capita)                       | X        |         |         | X        |         |         |
| Ovarian cancer           | Female | Diabetes Age-Standardized Prevalence (proportion) |          | X       |         |          | X       |         |
| Ovarian cancer           | Female | Log-transformed SEV scalar: Ovary C               | X        |         |         | X        |         |         |
| Ovarian cancer           | Female | Education (years per capita)                      |          |         | X       |          |         | X       |
| Ovarian cancer           | Female | Mean BMI                                          |          | X       |         |          | X       |         |
| Ovarian cancer           | Female | Total Fertility Rate                              |          | X       |         |          | X       |         |
| Ovarian cancer           | Female | Socio-demographic Index                           |          |         | X       |          |         | X       |
| Testicular cancer        | Male   | Cumulative Cigarettes (10 Years)                  |          | X       |         |          | X       |         |
| Testicular cancer        | Male   | Cumulative Cigarettes (15 Years)                  |          | X       |         |          | X       |         |
| Testicular cancer        | Male   | Cumulative Cigarettes (5 Years)                   |          | X       |         |          | X       |         |

| Cause             | Sex    | Covariate                                         | GBD 2015 |         |         | GBD 2016 |         |         |
|-------------------|--------|---------------------------------------------------|----------|---------|---------|----------|---------|---------|
|                   |        |                                                   | Level 1  | Level 2 | Level 3 | Level 1  | Level 2 | Level 3 |
| Testicular cancer | Male   | Education (years per capita)                      |          |         | X       |          |         | X       |
| Testicular cancer | Male   | Fruits (kcal per capita)                          |          | X       |         |          | X       |         |
| Testicular cancer | Male   | Health System Access 2 (unitless)                 |          | X       |         |          | X       |         |
| Testicular cancer | Male   | LDI (I\$ per capita)                              |          |         | X       |          |         | X       |
| Testicular cancer | Male   | Vegetables (kcal per capita)                      |          | X       |         |          | X       |         |
| Testicular cancer | Male   | Socio-demographic Index                           |          |         | X       |          |         | X       |
| Kidney cancer     | Male   | Cumulative Cigarettes (10 Years)                  | X        |         |         | X        |         |         |
| Kidney cancer     | Male   | Cumulative Cigarettes (15 Years)                  | X        |         |         | X        |         |         |
| Kidney cancer     | Male   | Socio-demographic Index                           |          |         | X       |          |         | X       |
| Kidney cancer     | Male   | Cumulative Cigarettes (5 Years)                   | X        |         |         | X        |         |         |
| Kidney cancer     | Male   | Alcohol (liters per capita)                       |          | X       |         |          | X       |         |
| Kidney cancer     | Male   | Education (years per capita)                      |          |         | X       |          |         | X       |
| Kidney cancer     | Male   | LDI (I\$ per capita)                              |          |         | X       |          |         | X       |
| Kidney cancer     | Male   | Health System Access 2 (unitless)                 |          | X       |         |          | X       |         |
| Kidney cancer     | Male   | Diabetes Age-Standardized Prevalence (proportion) |          | X       |         |          | X       |         |
| Kidney cancer     | Male   | Smoking Prevalence                                |          | X       |         |          | X       |         |
| Kidney cancer     | Male   | Systolic Blood Pressure (mmHg)                    |          | X       |         |          | X       |         |
| Kidney cancer     | Male   | Mean BMI                                          | X        |         |         | X        |         |         |
| Kidney cancer     | Male   | Log-transformed SEV scalar: Kidney C              | X        |         |         | X        |         |         |
| Kidney cancer     | Female | Cumulative Cigarettes (10 Years)                  | X        |         |         | X        |         |         |
| Kidney cancer     | Female | Cumulative Cigarettes (15 Years)                  | X        |         |         | X        |         |         |
| Kidney cancer     | Female | Socio-demographic Index                           |          |         | X       |          |         | X       |
| Kidney cancer     | Female | Cumulative Cigarettes (5 Years)                   | X        |         |         | X        |         |         |
| Kidney cancer     | Female | Alcohol (liters per capita)                       |          | X       |         |          | X       |         |
| Kidney cancer     | Female | Total Calories (kcal per capita)                  |          | X       |         |          | X       |         |
| Kidney cancer     | Female | Education (years per capita)                      |          |         | X       |          |         | X       |

| Cause          | Sex    | Covariate                                           | GBD 2015 |         |         | GBD 2016 |         |         |
|----------------|--------|-----------------------------------------------------|----------|---------|---------|----------|---------|---------|
|                |        |                                                     | Level 1  | Level 2 | Level 3 | Level 1  | Level 2 | Level 3 |
| Kidney cancer  | Female | LDI (I\$ per capita)                                |          |         | X       |          |         | X       |
| Kidney cancer  | Female | Health System Access 2 (unitless)                   |          | X       |         |          | X       |         |
| Kidney cancer  | Female | Diabetes Age-Standardized Prevalence (proportion)   |          | X       |         |          | X       |         |
| Kidney cancer  | Female | Total Fertility Rate                                |          |         | X       |          |         | X       |
| Kidney cancer  | Female | Smoking Prevalence                                  |          | X       |         |          | X       |         |
| Kidney cancer  | Female | Systolic Blood Pressure (mmHg)                      |          | X       |         |          | X       |         |
| Kidney cancer  | Female | Mean BMI                                            | X        |         |         | X        |         |         |
| Kidney cancer  | Female | Log-transformed SEV scalar: Kidney C                | X        |         |         | X        |         |         |
| Bladder cancer | Male   | Cumulative Cigarettes (10 Years)                    | X        |         |         | X        |         |         |
| Bladder cancer | Male   | Cumulative Cigarettes (15 Years)                    | X        |         |         | X        |         |         |
| Bladder cancer | Male   | Cumulative Cigarettes (5 Years)                     | X        |         |         | X        |         |         |
| Bladder cancer | Male   | Education (years per capita)                        |          |         | X       |          |         | X       |
| Bladder cancer | Male   | LDI (I\$ per capita)                                |          |         | X       |          |         | X       |
| Bladder cancer | Male   | Socio-demographic Index                             |          |         | X       |          |         | X       |
| Bladder cancer | Male   | Smoking Prevalence                                  | X        |         |         | X        |         |         |
| Bladder cancer | Male   | Alcohol (liters per capita)                         |          | X       |         |          | X       |         |
| Bladder cancer | Male   | Log-transformed SEV scalar: Bladder C               | X        |         |         | X        |         |         |
| Bladder cancer | Male   | Population Density (under 150 ppl/sqkm, proportion) |          | X       |         |          | X       |         |
| Bladder cancer | Male   | Population Density (over 1000 ppl/sqkm, proportion) |          | X       |         |          | X       |         |
| Bladder cancer | Female | Cumulative Cigarettes (10 Years)                    | X        |         |         | X        |         |         |
| Bladder cancer | Female | Cumulative Cigarettes (15 Years)                    | X        |         |         | X        |         |         |
| Bladder cancer | Female | Cumulative Cigarettes (5 Years)                     | X        |         |         | X        |         |         |
| Bladder cancer | Female | Education (years per capita)                        |          |         | X       |          |         | X       |
| Bladder cancer | Female | LDI (I\$ per capita)                                |          |         | X       |          |         | X       |
| Bladder cancer | Female | Socio-demographic Index                             |          |         | X       |          |         | X       |

| Cause                           | Sex    | Covariate                                           | GBD 2015 |         |         | GBD 2016 |         |         |
|---------------------------------|--------|-----------------------------------------------------|----------|---------|---------|----------|---------|---------|
|                                 |        |                                                     | Level 1  | Level 2 | Level 3 | Level 1  | Level 2 | Level 3 |
| Bladder cancer                  | Female | Smoking Prevalence                                  | X        |         |         | X        |         |         |
| Bladder cancer                  | Female | Alcohol (liters per capita)                         |          | X       |         |          | X       |         |
| Bladder cancer                  | Female | Log-transformed SEV scalar: Bladder C               | X        |         |         | X        |         |         |
| Bladder cancer                  | Female | Population Density (under 150 ppl/sqkm, proportion) |          | X       |         |          | X       |         |
| Bladder cancer                  | Female | Population Density (over 1000 ppl/sqkm, proportion) |          | X       |         |          | X       |         |
| Brain and nervous system cancer | Male   | Cumulative Cigarettes (10 Years)                    | X        |         |         | X        |         |         |
| Brain and nervous system cancer | Male   | Cumulative Cigarettes (15 Years)                    | X        |         |         | X        |         |         |
| Brain and nervous system cancer | Male   | Vegetables (kcal per capita)                        |          | X       |         |          | X       |         |
| Brain and nervous system cancer | Male   | Smoking Prevalence                                  | X        |         |         | X        |         |         |
| Brain and nervous system cancer | Male   | Education (years per capita)                        |          |         | X       |          |         | X       |
| Brain and nervous system cancer | Male   | LDI (I\$ per capita)                                |          |         | X       |          |         | X       |
| Brain and nervous system cancer | Male   | Alcohol (liters per capita)                         | X        |         |         | X        |         |         |
| Brain and nervous system cancer | Male   | Systolic Blood Pressure (mmHg)                      |          | X       |         |          | X       |         |
| Brain and nervous system cancer | Male   | Cholesterol (total, mean per capita)                |          | X       |         |          | X       |         |
| Brain and nervous system cancer | Male   | Socio-demographic Index                             |          |         | X       |          |         | X       |
| Brain and nervous system cancer | Female | Cumulative Cigarettes (10 Years)                    | X        |         |         | X        |         |         |
| Brain and nervous system        | Female | Cumulative Cigarettes (15 Years)                    | X        |         |         | X        |         |         |

| Cause                           | Sex    | Covariate                                      | GBD 2015 |         |         | GBD 2016 |         |         |
|---------------------------------|--------|------------------------------------------------|----------|---------|---------|----------|---------|---------|
|                                 |        |                                                | Level 1  | Level 2 | Level 3 | Level 1  | Level 2 | Level 3 |
| cancer                          |        |                                                |          |         |         |          |         |         |
| Brain and nervous system cancer | Female | Smoking Prevalence                             | X        |         |         | X        |         |         |
| Brain and nervous system cancer | Female | Education (years per capita)                   |          |         | X       |          |         | X       |
| Brain and nervous system cancer | Female | LDI (I\$ per capita)                           |          |         | X       |          |         | X       |
| Brain and nervous system cancer | Female | Alcohol (liters per capita)                    | X        |         |         | X        |         |         |
| Brain and nervous system cancer | Female | Systolic Blood Pressure (mmHg)                 |          | X       |         |          | X       |         |
| Brain and nervous system cancer | Female | Cholesterol (total, mean per capita)           |          | X       |         |          | X       |         |
| Brain and nervous system cancer | Female | Socio-demographic Index                        |          |         | X       |          |         | X       |
| Thyroid cancer                  | Male   | Smoking Prevalence                             | X        |         |         |          | X       |         |
| Thyroid cancer                  | Male   | Smoking Prevalence                             | X        |         |         | X        |         |         |
| Thyroid cancer                  | Male   | Sanitation (proportion with access)            |          | X       |         |          | X       |         |
| Thyroid cancer                  | Male   | Tobacco (cigarettes per capita)                | X        |         |         |          | X       |         |
| Thyroid cancer                  | Male   | Education (years per capita)                   |          |         | X       |          |         | X       |
| Thyroid cancer                  | Male   | Log-transformed SEV scalar: Thyroid C          | X        |         |         | X        |         |         |
| Thyroid cancer                  | Male   | LDI (I\$ per capita)                           |          |         | X       |          |         | X       |
| Thyroid cancer                  | Male   | Socio-demographic Index                        |          |         | X       |          |         | X       |
| Thyroid cancer                  | Male   | Alcohol (liters per capita)                    | X        |         |         | X        |         |         |
| Thyroid cancer                  | Male   | Mean BMI                                       |          | X       |         |          | X       |         |
| Thyroid cancer                  | Male   | Improved Water Source (proportion with access) |          | X       |         |          | X       |         |
| Thyroid cancer                  | Female | Smoking Prevalence                             | X        |         |         |          | X       |         |
| Thyroid cancer                  | Female | Sanitation (proportion with access)            |          | X       |         |          | X       |         |

| Cause          | Sex    | Covariate                                           | GBD 2015 |         |         | GBD 2016 |         |         |
|----------------|--------|-----------------------------------------------------|----------|---------|---------|----------|---------|---------|
|                |        |                                                     | Level 1  | Level 2 | Level 3 | Level 1  | Level 2 | Level 3 |
| Thyroid cancer | Female | Tobacco (cigarettes per capita)                     | X        |         |         |          | X       |         |
| Thyroid cancer | Female | Education (years per capita)                        |          |         | X       |          |         | X       |
| Thyroid cancer | Female | Log-transformed SEV scalar: Thyroid C               | X        |         |         | X        |         |         |
| Thyroid cancer | Female | LDI (I\$ per capita)                                |          |         | X       |          |         | X       |
| Thyroid cancer | Female | Socio-demographic Index                             |          |         | X       |          |         | X       |
| Thyroid cancer | Female | Alcohol (liters per capita)                         | X        |         |         | X        |         |         |
| Thyroid cancer | Female | Mean BMI                                            |          | X       |         |          | X       |         |
| Thyroid cancer | Female | Improved Water Source (proportion with access)      |          | X       |         |          | X       |         |
| Mesothelioma   | Male   | Cumulative Cigarettes (5 Years)                     | X        |         |         | X        |         |         |
| Mesothelioma   | Male   | Education (years per capita)                        |          |         | X       |          |         | X       |
| Mesothelioma   | Male   | Gold production (binary)                            |          | X       |         |          | X       |         |
| Mesothelioma   | Male   | Gold production (kg) per capita                     |          | X       |         |          | X       |         |
| Mesothelioma   | Male   | LDI (I\$ per capita)                                |          |         | X       |          |         | X       |
| Mesothelioma   | Male   | Elevation Over 1500m (proportion)                   |          | X       |         |          | X       |         |
| Mesothelioma   | Male   | Elevation 500 to 1500m (proportion)                 |          | X       |         |          | X       |         |
| Mesothelioma   | Male   | Population Density (over 1000 ppl/sqkm, proportion) |          | X       |         |          | X       |         |
| Mesothelioma   | Male   | Population Over 65 (proportion)                     |          | X       |         |          | X       |         |
| Mesothelioma   | Male   | Smoking Prevalence                                  | X        |         |         | X        |         |         |
| Mesothelioma   | Male   | Socio-demographic Index                             |          |         | X       |          |         | X       |
| Mesothelioma   | Female | Asbestos production (binary)                        | X        |         |         | X        |         |         |
| Mesothelioma   | Female | Asbestos production (kg) per capita                 |          | X       |         |          | X       |         |
| Mesothelioma   | Female | Cumulative Cigarettes (5 Years)                     | X        |         |         | X        |         |         |
| Mesothelioma   | Female | Education (years per capita)                        |          |         | X       |          |         | X       |
| Mesothelioma   | Female | Gold production (binary)                            |          | X       |         |          | X       |         |
| Mesothelioma   | Female | Gold production (kg) per capita                     |          | X       |         |          | X       |         |

| Cause                | Sex    | Covariate                                           | GBD 2015 |         |         | GBD 2016 |         |         |
|----------------------|--------|-----------------------------------------------------|----------|---------|---------|----------|---------|---------|
|                      |        |                                                     | Level 1  | Level 2 | Level 3 | Level 1  | Level 2 | Level 3 |
| Mesothelioma         | Female | LDI (I\$ per capita)                                |          |         | X       |          |         | X       |
| Mesothelioma         | Female | Elevation Over 1500m (proportion)                   |          | X       |         |          | X       |         |
| Mesothelioma         | Female | Elevation 500 to 1500m (proportion)                 |          | X       |         |          | X       |         |
| Mesothelioma         | Female | Population Density (over 1000 ppl/sqkm, proportion) |          | X       |         |          | X       |         |
| Mesothelioma         | Female | Population Over 65 (proportion)                     |          | X       |         |          | X       |         |
| Mesothelioma         | Female | Smoking Prevalence                                  | X        |         |         | X        |         |         |
| Mesothelioma         | Female | Log-transformed SEV scalar: Mesothel                | X        |         |         | X        |         |         |
| Mesothelioma         | Female | Socio-demographic Index                             |          |         | X       |          |         | X       |
| Hodgkin lymphoma     | Male   | Education (years per capita)                        |          |         | X       |          |         | X       |
| Hodgkin lymphoma     | Male   | LDI (I\$ per capita)                                |          |         | X       |          |         | X       |
| Hodgkin lymphoma     | Male   | Socio-demographic Index                             |          |         | X       |          |         | X       |
| Hodgkin lymphoma     | Female | Education (years per capita)                        |          |         | X       |          |         | X       |
| Hodgkin lymphoma     | Female | LDI (I\$ per capita)                                |          |         | X       |          |         | X       |
| Hodgkin lymphoma     | Female | Socio-demographic Index                             |          |         | X       |          |         | X       |
| Non-Hodgkin lymphoma | Female | Cumulative Cigarettes (10 Years)                    |          | X       |         |          | X       |         |
| Non-Hodgkin lymphoma | Female | Socio-demographic Index                             |          |         | X       |          |         | X       |
| Non-Hodgkin lymphoma | Female | Smoking Prevalence                                  |          | X       |         |          | X       |         |
| Non-Hodgkin lymphoma | Female | LDI (I\$ per capita)                                |          |         | X       |          |         | X       |
| Non-Hodgkin lymphoma | Female | Health System Access 2 (unitless)                   | X        |         |         |          | X       |         |
| Non-Hodgkin lymphoma | Female | Total Fertility Rate                                |          |         | X       |          |         | X       |
| Non-Hodgkin lymphoma | Female | Alcohol (liters per capita)                         |          | X       |         |          | X       |         |
| Non-Hodgkin lymphoma | Male   | Cumulative Cigarettes (10 Years)                    |          | X       |         |          | X       |         |
| Non-Hodgkin lymphoma | Male   | Socio-demographic Index                             |          |         | X       |          |         | X       |
| Non-Hodgkin lymphoma | Male   | Smoking Prevalence                                  |          | X       |         |          | X       |         |
| Non-Hodgkin lymphoma | Male   | LDI (I\$ per capita)                                |          |         | X       |          |         | X       |
| Non-Hodgkin lymphoma | Male   | Health System Access 2 (unitless)                   | X        |         |         | X        |         |         |



| Cause                | Sex    | Covariate                                      | GBD 2015 |         |         | GBD 2016 |         |         |
|----------------------|--------|------------------------------------------------|----------|---------|---------|----------|---------|---------|
|                      |        |                                                | Level 1  | Level 2 | Level 3 | Level 1  | Level 2 | Level 3 |
| Non-Hodgkin lymphoma | Male   | Alcohol (liters per capita)                    |          | X       |         |          | X       |         |
| Multiple myeloma     | Female | Smoking Prevalence                             | X        |         |         | X        |         |         |
| Multiple myeloma     | Female | Sanitation (proportion with access)            |          | X       |         |          | X       |         |
| Multiple myeloma     | Female | Tobacco (cigarettes per capita)                | X        |         |         | X        |         |         |
| Multiple myeloma     | Female | Education (years per capita)                   |          |         | X       |          |         | X       |
| Multiple myeloma     | Female | LDI (I\$ per capita)                           |          |         | X       |          |         | X       |
| Multiple myeloma     | Female | Socio-demographic Index                        |          |         | X       |          |         | X       |
| Multiple myeloma     | Female | Alcohol (liters per capita)                    | X        |         |         | X        |         |         |
| Multiple myeloma     | Female | Mean BMI                                       |          | X       |         |          | X       |         |
| Multiple myeloma     | Female | Improved Water Source (proportion with access) |          | X       |         |          | X       |         |
| Multiple myeloma     | Male   | Smoking Prevalence                             | X        |         |         | X        |         |         |
| Multiple myeloma     | Male   | Sanitation (proportion with access)            |          | X       |         |          | X       |         |
| Multiple myeloma     | Male   | Tobacco (cigarettes per capita)                | X        |         |         | X        |         |         |
| Multiple myeloma     | Male   | Education (years per capita)                   |          |         | X       |          |         | X       |
| Multiple myeloma     | Male   | LDI (I\$ per capita)                           |          |         | X       |          |         | X       |
| Multiple myeloma     | Male   | Socio-demographic Index                        |          |         | X       |          |         | X       |
| Multiple myeloma     | Male   | Alcohol (liters per capita)                    | X        |         |         | X        |         |         |
| Multiple myeloma     | Male   | Mean BMI                                       |          | X       |         |          | X       |         |
| Multiple myeloma     | Male   | Improved Water Source (proportion with access) |          | X       |         |          | X       |         |
| Leukemia             | Male   | Cumulative Cigarettes (10 Years)               | X        |         |         |          | X       |         |
| Leukemia             | Male   | Cumulative Cigarettes (15 Years)               | X        |         |         |          | X       |         |
| Leukemia             | Male   | Socio-demographic Index                        |          |         | X       |          |         | X       |
| Leukemia             | Male   | Cumulative Cigarettes (5 Years)                | X        |         |         |          | X       |         |
| Leukemia             | Male   | Education (years per capita)                   |          |         | X       |          |         | X       |
| Leukemia             | Male   | LDI (I\$ per capita)                           |          |         | X       |          |         | X       |

| Cause                   | Sex    | Covariate                            | GBD 2015 |         |         | GBD 2016 |         |         |
|-------------------------|--------|--------------------------------------|----------|---------|---------|----------|---------|---------|
|                         |        |                                      | Level 1  | Level 2 | Level 3 | Level 1  | Level 2 | Level 3 |
| Leukemia                | Male   | Health System Access 2 (unitless)    | X        |         |         |          | X       |         |
| Leukemia                | Male   | Log-transformed SEV scalar: Leukemia | X        |         |         | X        |         |         |
| Leukemia                | Male   | Smoking Prevalence                   | X        |         |         |          | X       |         |
| Leukemia                | Male   | Alcohol (liters per capita)          |          | X       |         |          | X       |         |
| Leukemia                | Female | Alcohol (liters per capita)          |          | X       |         |          | X       |         |
| Leukemia                | Female | Cumulative Cigarettes (10 Years)     | X        |         |         |          | X       |         |
| Leukemia                | Female | Cumulative Cigarettes (15 Years)     | X        |         |         |          | X       |         |
| Leukemia                | Female | Education (years per capita)         |          |         | X       |          |         | X       |
| Leukemia                | Female | Health System Access 2 (unitless)    | X        |         |         |          | X       |         |
| Leukemia                | Female | Health System Access 2 (unitless)    | X        |         |         | X        |         |         |
| Leukemia                | Female | LDI (I\$ per capita)                 |          |         | X       |          |         | X       |
| Leukemia                | Female | Smoking Prevalence                   | X        |         |         |          | X       |         |
| Leukemia                | Female | Log-transformed SEV scalar: Leukemia | X        |         |         | X        |         |         |
| Leukemia                | Female | Socio-demographic Index              |          |         | X       |          |         | X       |
| Acute lymphoid leukemia | Male   | Cumulative Cigarettes (10 Years)     | X        |         |         |          | X       |         |
| Acute lymphoid leukemia | Male   | Socio-demographic Index              |          |         | X       |          |         | X       |
| Acute lymphoid leukemia | Male   | Cumulative Cigarettes (5 Years)      | X        |         |         |          | X       |         |
| Acute lymphoid leukemia | Male   | Education (years per capita)         |          |         | X       |          |         | X       |
| Acute lymphoid leukemia | Male   | LDI (I\$ per capita)                 |          |         | X       |          |         | X       |
| Acute lymphoid leukemia | Male   | Health System Access 2 (unitless)    | X        |         |         |          | X       |         |
| Acute lymphoid leukemia | Male   | Log-transformed SEV scalar: Leukemia | X        |         |         | X        |         |         |
| Acute lymphoid leukemia | Male   | Smoking Prevalence                   | X        |         |         |          | X       |         |
| Acute lymphoid leukemia | Male   | Alcohol (liters per capita)          |          | X       |         |          | X       |         |
| Acute lymphoid leukemia | Female | Cumulative Cigarettes (10 Years)     | X        |         |         |          | X       |         |
| Acute lymphoid leukemia | Female | Socio-demographic Index              |          |         | X       |          |         | X       |
| Acute lymphoid leukemia | Female | Cumulative Cigarettes (5 Years)      | X        |         |         |          | X       |         |
| Acute lymphoid leukemia | Female | Education (years per capita)         |          |         | X       |          |         | X       |

| Cause                     | Sex    | Covariate                            | GBD 2015 |         |         | GBD 2016 |         |         |
|---------------------------|--------|--------------------------------------|----------|---------|---------|----------|---------|---------|
|                           |        |                                      | Level 1  | Level 2 | Level 3 | Level 1  | Level 2 | Level 3 |
| Acute lymphoid leukemia   | Female | LDI (I\$ per capita)                 |          |         | X       |          |         | X       |
| Acute lymphoid leukemia   | Female | Health System Access 2 (unitless)    | X        |         |         |          | X       |         |
| Acute lymphoid leukemia   | Female | Log-transformed SEV scalar: Leukemia | X        |         |         | X        |         |         |
| Acute lymphoid leukemia   | Female | Smoking Prevalence                   | X        |         |         |          | X       |         |
| Acute lymphoid leukemia   | Female | Alcohol (liters per capita)          |          | X       |         |          | X       |         |
| Chronic lymphoid leukemia | Female | Cumulative Cigarettes (10 Years)     | X        |         |         |          | X       |         |
| Chronic lymphoid leukemia | Female | Socio-demographic Index              |          |         | X       |          |         | X       |
| Chronic lymphoid leukemia | Female | Cumulative Cigarettes (5 Years)      | X        |         |         |          | X       |         |
| Chronic lymphoid leukemia | Female | Education (years per capita)         |          |         | X       |          |         | X       |
| Chronic lymphoid leukemia | Female | LDI (I\$ per capita)                 |          |         | X       |          |         | X       |
| Chronic lymphoid leukemia | Female | Health System Access 2 (unitless)    | X        |         |         |          | X       |         |
| Chronic lymphoid leukemia | Female | Log-transformed SEV scalar: Leukemia | X        |         |         | X        |         |         |
| Chronic lymphoid leukemia | Female | Smoking Prevalence                   | X        |         |         |          | X       |         |
| Chronic lymphoid leukemia | Female | Alcohol (liters per capita)          |          | X       |         |          | X       |         |
| Chronic lymphoid leukemia | Male   | Cumulative Cigarettes (10 Years)     | X        |         |         |          | X       |         |
| Chronic lymphoid leukemia | Male   | Socio-demographic Index              |          |         | X       |          |         | X       |
| Chronic lymphoid leukemia | Male   | Cumulative Cigarettes (5 Years)      | X        |         |         |          | X       |         |
| Chronic lymphoid leukemia | Male   | Education (years per capita)         |          |         | X       |          |         | X       |
| Chronic lymphoid leukemia | Male   | LDI (I\$ per capita)                 |          |         | X       |          |         | X       |
| Chronic lymphoid leukemia | Male   | Health System Access 2 (unitless)    | X        |         |         |          | X       |         |
| Chronic lymphoid leukemia | Male   | Log-transformed SEV scalar: Leukemia | X        |         |         | X        |         |         |
| Chronic lymphoid leukemia | Male   | Smoking Prevalence                   | X        |         |         |          | X       |         |
| Chronic lymphoid leukemia | Male   | Alcohol (liters per capita)          |          | X       |         |          | X       |         |
| Acute myeloid leukemia    | Male   | Cumulative Cigarettes (10 Years)     | X        |         |         |          | X       |         |
| Acute myeloid leukemia    | Male   | Socio-demographic Index              |          |         | X       |          |         | X       |
| Acute myeloid leukemia    | Male   | Cumulative Cigarettes (5 Years)      | X        |         |         |          | X       |         |
| Acute myeloid leukemia    | Male   | Tobacco (cigarettes per capita)      | X        |         |         |          | X       |         |

| Cause                    | Sex    | Covariate                            | GBD 2015 |         |         | GBD 2016 |         |         |
|--------------------------|--------|--------------------------------------|----------|---------|---------|----------|---------|---------|
|                          |        |                                      | Level 1  | Level 2 | Level 3 | Level 1  | Level 2 | Level 3 |
| Acute myeloid leukemia   | Male   | Education (years per capita)         |          |         | X       |          |         | X       |
| Acute myeloid leukemia   | Male   | LDI (I\$ per capita)                 |          |         | X       |          |         | X       |
| Acute myeloid leukemia   | Male   | Health System Access 2 (unitless)    | X        |         |         |          | X       |         |
| Acute myeloid leukemia   | Male   | Health System Access 2 (unitless)    | X        |         |         | X        |         |         |
| Acute myeloid leukemia   | Male   | Log-transformed SEV scalar: Leukemia | X        |         |         | X        |         |         |
| Acute myeloid leukemia   | Male   | Smoking Prevalence                   | X        |         |         |          | X       |         |
| Acute myeloid leukemia   | Male   | Alcohol (liters per capita)          |          | X       |         |          | X       |         |
| Acute myeloid leukemia   | Female | Cumulative Cigarettes (10 Years)     | X        |         |         |          | X       |         |
| Acute myeloid leukemia   | Female | Socio-demographic Index              |          |         | X       |          |         | X       |
| Acute myeloid leukemia   | Female | Cumulative Cigarettes (5 Years)      | X        |         |         |          | X       |         |
| Acute myeloid leukemia   | Female | Tobacco (cigarettes per capita)      | X        |         |         |          | X       |         |
| Acute myeloid leukemia   | Female | Education (years per capita)         |          |         | X       |          |         | X       |
| Acute myeloid leukemia   | Female | LDI (I\$ per capita)                 |          |         | X       |          |         | X       |
| Acute myeloid leukemia   | Female | Health System Access 2 (unitless)    | X        |         |         |          | X       |         |
| Acute myeloid leukemia   | Female | Log-transformed SEV scalar: Leukemia | X        |         |         | X        |         |         |
| Acute myeloid leukemia   | Female | Smoking Prevalence                   | X        |         |         |          | X       |         |
| Acute myeloid leukemia   | Female | Alcohol (liters per capita)          |          | X       |         |          | X       |         |
| Chronic myeloid leukemia | Male   | Cumulative Cigarettes (10 Years)     | X        |         |         |          | X       |         |
| Chronic myeloid leukemia | Male   | Socio-demographic Index              |          |         | X       |          |         | X       |
| Chronic myeloid leukemia | Male   | Cumulative Cigarettes (5 Years)      | X        |         |         |          | X       |         |
| Chronic myeloid leukemia | Male   | Education (years per capita)         |          |         | X       |          |         | X       |
| Chronic myeloid leukemia | Male   | LDI (I\$ per capita)                 |          |         | X       |          |         | X       |
| Chronic myeloid leukemia | Male   | Health System Access 2 (unitless)    | X        |         |         |          | X       |         |
| Chronic myeloid leukemia | Male   | Smoking Prevalence                   | X        |         |         |          | X       |         |
| Chronic myeloid leukemia | Male   | Alcohol (liters per capita)          |          | X       |         |          | X       |         |
| Chronic myeloid leukemia | Female | Cumulative Cigarettes (10 Years)     | X        |         |         |          | X       |         |
| Chronic myeloid leukemia | Female | Socio-demographic Index              |          |         | X       |          |         | X       |

| Cause                    | Sex    | Covariate                         | GBD 2015 |         |         | GBD 2016 |         |         |
|--------------------------|--------|-----------------------------------|----------|---------|---------|----------|---------|---------|
|                          |        |                                   | Level 1  | Level 2 | Level 3 | Level 1  | Level 2 | Level 3 |
| Chronic myeloid leukemia | Female | Cumulative Cigarettes (5 Years)   | X        |         |         |          | X       |         |
| Chronic myeloid leukemia | Female | Education (years per capita)      |          |         | X       |          |         | X       |
| Chronic myeloid leukemia | Female | LDI (I\$ per capita)              |          |         | X       |          |         | X       |
| Chronic myeloid leukemia | Female | Health System Access 2 (unitless) | X        |         |         |          | X       |         |
| Chronic myeloid leukemia | Female | Smoking Prevalence                | X        |         |         |          | X       |         |
| Chronic myeloid leukemia | Female | Alcohol (liters per capita)       |          | X       |         |          | X       |         |
| Other neoplasms          | Male   | Tobacco (cigarettes per capita)   | X        |         |         | X        |         |         |
| Other neoplasms          | Male   | Education (years per capita)      |          |         | X       |          |         | X       |
| Other neoplasms          | Male   | Health System Access 2 (unitless) |          | X       |         |          | X       |         |
| Other neoplasms          | Male   | LDI (I\$ per capita)              |          |         | X       |          |         | X       |
| Other neoplasms          | Male   | Nuts & Seeds (kcal per capita)    |          | X       |         |          | X       |         |
| Other neoplasms          | Male   | Smoking Prevalence                | X        |         |         | X        |         |         |
| Other neoplasms          | Male   | Socio-demographic Index           |          |         | X       |          |         | X       |
| Other neoplasms          | Female | Tobacco (cigarettes per capita)   | X        |         |         | X        |         |         |
| Other neoplasms          | Female | Education (years per capita)      |          |         | X       |          |         | X       |
| Other neoplasms          | Female | Health System Access 2 (unitless) |          | X       |         |          | X       |         |
| Other neoplasms          | Female | LDI (I\$ per capita)              |          |         | X       |          |         | X       |
| Other neoplasms          | Female | Smoking Prevalence                | X        |         |         | X        |         |         |
| Other neoplasms          | Female | Socio-demographic Index           |          |         | X       |          |         | X       |

*eTable 10: Results for CODEm model testing*

| Cause                         | Sex    | Age start   | Age end   | Predictive validity |          |          |           |             |              |
|-------------------------------|--------|-------------|-----------|---------------------|----------|----------|-----------|-------------|--------------|
|                               |        |             |           | RMSE in             | RMSE out | Trend in | Trend out | Coverage in | Coverage out |
| Esophageal cancer [Data Rich] | Male   | 15-19 years | 95+ years | 0.198433            | 0.245255 | 0.161804 | 0.185832  | 0.998919    | 0.997968     |
| Esophageal cancer [Data       | Female | 15-19       | 95+       | 0.215283            | 0.268253 | 0.179366 | 0.206173  | 0.998593    | 0.997497     |

| Cause                                           | Sex    | Age start   | Age end   | Predictive validity |          |          |           |             |              |
|-------------------------------------------------|--------|-------------|-----------|---------------------|----------|----------|-----------|-------------|--------------|
|                                                 |        |             |           | RMSE in             | RMSE out | Trend in | Trend out | Coverage in | Coverage out |
| Rich]                                           |        | years       | years     |                     |          |          |           |             |              |
| Esophageal cancer [Global]                      | Female | 15-19 years | 95+ years | 0.272331            | 0.449786 | 0.211737 | 0.217784  | 0.997501    | 0.980359     |
| Esophageal cancer [Global]                      | Male   | 15-19 years | 95+ years | 0.238675            | 0.413533 | 0.185874 | 0.189452  | 0.997966    | 0.980274     |
| Stomach cancer [Data Rich]                      | Male   | 15-19 years | 95+ years | 0.168624            | 0.204856 | 0.135969 | 0.153663  | 0.998632    | 0.997638     |
| Stomach cancer [Data Rich]                      | Female | 15-19 years | 95+ years | 0.174226            | 0.211966 | 0.142399 | 0.164469  | 0.998495    | 0.99713      |
| Stomach cancer [Global]                         | Female | 15-19 years | 95+ years | 0.204713            | 0.321435 | 0.162978 | 0.160719  | 0.99867     | 0.984612     |
| Stomach cancer [Global]                         | Male   | 15-19 years | 95+ years | 0.196924            | 0.307854 | 0.153815 | 0.152673  | 0.998643    | 0.980242     |
| Liver cancer [Global]                           | Male   | 5-9 years   | 95+ years | 0.269051            | 0.454562 | 0.209164 | 0.210674  | 0.998031    | 0.986505     |
| Liver cancer [Data Rich]                        | Male   | 5-9 years   | 95+ years | 0.2413              | 0.325407 | 0.191496 | 0.224282  | 0.998065    | 0.996981     |
| Liver cancer [Global]                           | Female | 5-9 years   | 95+ years | 0.277507            | 0.413467 | 0.216708 | 0.218733  | 0.998803    | 0.991523     |
| Liver cancer [Data Rich]                        | Female | 5-9 years   | 95+ years | 0.232587            | 0.30673  | 0.193079 | 0.226226  | 0.998381    | 0.997116     |
| Larynx cancer [Data Rich]                       | Male   | 15-19 years | 95+ years | 0.200641            | 0.252556 | 0.161284 | 0.192664  | 0.997858    | 0.997282     |
| Larynx cancer [Data Rich]                       | Female | 15-19 years | 95+ years | 0.30673             | 0.388496 | 0.253812 | 0.302646  | 0.975795    | 0.977395     |
| Larynx cancer [Global]                          | Male   | 15-19 years | 95+ years | 0.234619            | 0.374157 | 0.181438 | 0.191236  | 0.998393    | 0.986868     |
| Larynx cancer [Global]                          | Female | 15-19 years | 95+ years | 0.356904            | 0.5464   | 0.283167 | 0.287904  | 0.98139     | 0.973441     |
| Tracheal, bronchus, and lung cancer [Data Rich] | Female | 15-19 years | 95+ years | 0.188871            | 0.231498 | 0.154034 | 0.180269  | 0.998449    | 0.997224     |

| Cause                                           | Sex    | Age start   | Age end   | Predictive validity |          |          |           |             |              |
|-------------------------------------------------|--------|-------------|-----------|---------------------|----------|----------|-----------|-------------|--------------|
|                                                 |        |             |           | RMSE in             | RMSE out | Trend in | Trend out | Coverage in | Coverage out |
| Tracheal, bronchus, and lung cancer [Data Rich] | Male   | 15-19 years | 95+ years | 0.181641            | 0.221799 | 0.146639 | 0.164353  | 0.99861     | 0.997327     |
| Tracheal, bronchus, and lung cancer [Global]    | Female | 15-19 years | 95+ years | 0.225478            | 0.304297 | 0.174547 | 0.175022  | 0.998643    | 0.995915     |
| Tracheal, bronchus, and lung cancer [Global]    | Male   | 15-19 years | 95+ years | 0.212545            | 0.307851 | 0.166159 | 0.169413  | 0.998557    | 0.990068     |
| Breast cancer [Data Rich]                       | Male   | 15-19 years | 95+ years | 0.339918            | 0.42271  | 0.265862 | 0.31327   | 0.97947     | 0.976519     |
| Breast cancer [Data Rich]                       | Female | 15-19 years | 95+ years | 0.192908            | 0.233432 | 0.155652 | 0.177959  | 0.996331    | 0.993547     |
| Breast cancer [Global]                          | Female | 15-19 years | 95+ years | 0.211224            | 0.287481 | 0.162086 | 0.167525  | 0.997149    | 0.990481     |
| Breast cancer [Global]                          | Male   | 15-19 years | 95+ years | 0.423524            | 0.594604 | 0.313547 | 0.315621  | 0.979072    | 0.968179     |
| Cervical cancer [Data Rich]                     | Female | 15-19 years | 95+ years | 0.193564            | 0.239786 | 0.156019 | 0.182773  | 0.998702    | 0.997568     |
| Cervical cancer [Global]                        | Female | 15-19 years | 95+ years | 0.244551            | 0.350403 | 0.188472 | 0.186523  | 0.999189    | 0.990516     |
| Uterine cancer [Global]                         | Female | 15-19 years | 95+ years | 0.26113             | 0.405926 | 0.203732 | 0.203708  | 0.999474    | 0.993606     |
| Uterine cancer [Data Rich]                      | Female | 15-19 years | 95+ years | 0.215364            | 0.272806 | 0.172502 | 0.20594   | 0.999534    | 0.998942     |
| Prostate cancer [Data Rich]                     | Male   | 15-19 years | 95+ years | 0.25085             | 0.303217 | 0.204423 | 0.237726  | 0.996921    | 0.994794     |
| Prostate cancer [Global]                        | Male   | 15-19 years | 95+ years | 0.29197             | 0.370344 | 0.218901 | 0.21368   | 0.996743    | 0.986557     |
| Colon and rectum cancer [Data Rich]             | Male   | 15-19 years | 95+ years | 0.185598            | 0.224739 | 0.152051 | 0.172096  | 0.998745    | 0.997677     |
| Colon and rectum cancer [Data Rich]             | Female | 15-19 years | 95+ years | 0.195509            | 0.240842 | 0.161929 | 0.192825  | 0.998011    | 0.996491     |
| Colon and rectum cancer                         | Male   | 15-19       | 95+       | 0.208621            | 0.291093 | 0.166006 | 0.167229  | 0.999046    | 0.991509     |

| Cause                                            | Sex    | Age start   | Age end   | Predictive validity |          |          |           |             |              |
|--------------------------------------------------|--------|-------------|-----------|---------------------|----------|----------|-----------|-------------|--------------|
|                                                  |        |             |           | RMSE in             | RMSE out | Trend in | Trend out | Coverage in | Coverage out |
| [Global]                                         |        | years       | years     |                     |          |          |           |             |              |
| Colon and rectum cancer [Global]                 | Female | 15-19 years | 95+ years | 0.215863            | 0.294113 | 0.171992 | 0.168904  | 0.998465    | 0.990486     |
| Lip and oral cavity cancer [Data Rich]           | Male   | 15-19 years | 95+ years | 0.207908            | 0.252841 | 0.168893 | 0.183409  | 0.999097    | 0.998219     |
| Lip and oral cavity cancer [Data Rich]           | Female | 15-19 years | 95+ years | 0.217054            | 0.273426 | 0.177172 | 0.204022  | 0.999549    | 0.999077     |
| Lip and oral cavity cancer [Global]              | Male   | 15-19 years | 95+ years | 0.252937            | 0.355882 | 0.20016  | 0.196201  | 0.998305    | 0.991385     |
| Lip and oral cavity cancer [Global]              | Female | 15-19 years | 95+ years | 0.252204            | 0.349135 | 0.192715 | 0.197068  | 0.999507    | 0.995154     |
| Nasopharynx cancer [Data Rich]                   | Female | 5-9 years   | 95+ years | 0.305983            | 0.418084 | 0.256857 | 0.342077  | 0.991357    | 0.991272     |
| Nasopharynx cancer [Data Rich]                   | Male   | 5-9 years   | 95+ years | 0.256041            | 0.343061 | 0.207344 | 0.249863  | 0.998424    | 0.997617     |
| Nasopharynx cancer [Global]                      | Female | 5-9 years   | 95+ years | 0.361818            | 0.574134 | 0.287872 | 0.294643  | 0.990987    | 0.982361     |
| Nasopharynx cancer [Global]                      | Male   | 5-9 years   | 95+ years | 0.303468            | 0.507949 | 0.238899 | 0.243384  | 0.998489    | 0.987144     |
| Other pharynx cancer [Data Rich]                 | Male   | 15-19 years | 95+ years | 0.243933            | 0.316171 | 0.196356 | 0.221139  | 0.99611     | 0.995076     |
| Other pharynx cancer [Data Rich]                 | Female | 15-19 years | 95+ years | 0.257668            | 0.327035 | 0.210857 | 0.248682  | 0.994188    | 0.993541     |
| Other pharynx cancer [Global]                    | Male   | 15-19 years | 95+ years | 0.287334            | 0.46305  | 0.218922 | 0.209273  | 0.996444    | 0.987678     |
| Other pharynx cancer [Global]                    | Female | 15-19 years | 95+ years | 0.319571            | 0.475567 | 0.248676 | 0.243749  | 0.994634    | 0.987119     |
| Gallbladder and biliary tract cancer [Data Rich] | Female | 15-19 years | 95+ years | 0.203972            | 0.267017 | 0.165798 | 0.189961  | 0.995926    | 0.994112     |
| Gallbladder and biliary tract cancer [Data Rich] | Male   | 15-19 years | 95+ years | 0.200502            | 0.247264 | 0.162741 | 0.182337  | 0.997554    | 0.996224     |



| Cause                                         | Sex    | Age start   | Age end   | Predictive validity |          |          |           |             |              |
|-----------------------------------------------|--------|-------------|-----------|---------------------|----------|----------|-----------|-------------|--------------|
|                                               |        |             |           | RMSE in             | RMSE out | Trend in | Trend out | Coverage in | Coverage out |
| Gallbladder and biliary tract cancer [Global] | Female | 15-19 years | 95+ years | 0.24119             | 0.382075 | 0.18688  | 0.183792  | 0.99678     | 0.982529     |
| Gallbladder and biliary tract cancer [Global] | Male   | 15-19 years | 95+ years | 0.261043            | 0.375592 | 0.187773 | 0.184805  | 0.998613    | 0.989089     |
| Pancreatic cancer [Data Rich]                 | Male   | 15-19 years | 95+ years | 0.173161            | 0.212802 | 0.140106 | 0.151654  | 0.998714    | 0.997757     |
| Pancreatic cancer [Data Rich]                 | Female | 15-19 years | 95+ years | 0.19234             | 0.240872 | 0.158471 | 0.180492  | 0.997995    | 0.996599     |
| Pancreatic cancer [Global]                    | Male   | 15-19 years | 95+ years | 0.198254            | 0.284044 | 0.152835 | 0.151022  | 0.998854    | 0.995525     |
| Pancreatic cancer [Global]                    | Female | 15-19 years | 95+ years | 0.209814            | 0.286474 | 0.168889 | 0.166741  | 0.998889    | 0.996591     |
| Malignant skin melanoma [Data Rich]           | Male   | 15-19 years | 95+ years | 0.258707            | 0.324742 | 0.207811 | 0.237785  | 0.999191    | 0.998467     |
| Malignant skin melanoma [Data Rich]           | Female | 15-19 years | 95+ years | 0.256129            | 0.301867 | 0.200431 | 0.216407  | 0.998728    | 0.997828     |
| Malignant skin melanoma [Global]              | Male   | 15-19 years | 95+ years | 0.296332            | 0.434735 | 0.225174 | 0.226047  | 0.998842    | 0.994037     |
| Malignant skin melanoma [Global]              | Female | 15-19 years | 95+ years | 0.292432            | 0.42973  | 0.222704 | 0.226799  | 0.998281    | 0.991761     |
| Non-melanoma skin cancer [Data Rich]          | Male   | 15-19 years | 95+ years | 0.155711            | 0.239935 | 0.112916 | 0.133783  | 0.99981     | 0.999603     |
| Non-melanoma skin cancer [Data Rich]          | Female | 15-19 years | 95+ years | 0.214155            | 0.309436 | 0.159857 | 0.183713  | 0.997395    | 0.997199     |
| Non-melanoma skin cancer [Global]             | Female | 15-19 years | 95+ years | 0.291672            | 0.489846 | 0.209023 | 0.217962  | 0.994887    | 0.985998     |
| Non-melanoma skin cancer [Global]             | Male   | 15-19 years | 95+ years | 0.192737            | 0.330459 | 0.136252 | 0.14092   | 0.999232    | 0.995604     |
| Ovarian cancer [Data Rich]                    | Female | 15-19 years | 95+ years | 0.195794            | 0.246041 | 0.157071 | 0.173662  | 0.998842    | 0.997833     |
| Ovarian cancer [Global]                       | Female | 15-19 years | 95+ years | 0.218013            | 0.313157 | 0.166727 | 0.167835  | 0.999174    | 0.994091     |

| Cause                                       | Sex    | Age start   | Age end   | Predictive validity |          |          |           |             |              |
|---------------------------------------------|--------|-------------|-----------|---------------------|----------|----------|-----------|-------------|--------------|
|                                             |        |             |           | RMSE in             | RMSE out | Trend in | Trend out | Coverage in | Coverage out |
|                                             |        | years       | years     |                     |          |          |           |             |              |
| Testicular cancer [Global]                  | Male   | 15-19 years | 95+ years | 0.328371            | 0.529164 | 0.255569 | 0.25659   | 0.999375    | 0.995125     |
| Testicular cancer [Data Rich]               | Male   | 15-19 years | 95+ years | 0.283022            | 0.371326 | 0.232189 | 0.243099  | 0.999645    | 0.999282     |
| Kidney cancer [Data Rich]                   | Male   | 0-6 days    | 95+ years | 0.241409            | 0.355526 | 0.19905  | 0.233492  | 0.999066    | 0.998706     |
| Kidney cancer [Data Rich]                   | Female | 0-6 days    | 95+ years | 0.269859            | 0.399459 | 0.223989 | 0.265876  | 0.998886    | 0.997983     |
| Kidney cancer [Global]                      | Male   | 0-6 days    | 95+ years | 0.280428            | 0.40437  | 0.224896 | 0.23264   | 0.999225    | 0.994304     |
| Kidney cancer [Global]                      | Female | 0-6 days    | 95+ years | 0.309672            | 0.434952 | 0.251863 | 0.260629  | 0.999065    | 0.992195     |
| Bladder cancer [Data Rich]                  | Male   | 15-19 years | 95+ years | 0.238162            | 0.289199 | 0.193221 | 0.21405   | 0.998893    | 0.9979       |
| Bladder cancer [Global]                     | Male   | 15-19 years | 95+ years | 0.259512            | 0.358356 | 0.20438  | 0.211875  | 0.998849    | 0.993972     |
| Bladder cancer [Global]                     | Female | 15-19 years | 95+ years | 0.279362            | 0.406151 | 0.217047 | 0.218843  | 0.995797    | 0.992228     |
| Bladder cancer [Data Rich]                  | Female | 15-19 years | 95+ years | 0.241778            | 0.308128 | 0.197425 | 0.236098  | 0.995139    | 0.99458      |
| Brain and nervous system cancer [Data Rich] | Female | 0-6 days    | 95+ years | 0.233403            | 0.3046   | 0.177532 | 0.189069  | 0.998845    | 0.997948     |
| Brain and nervous system cancer [Global]    | Female | 0-6 days    | 95+ years | 0.302238            | 0.394989 | 0.217704 | 0.215738  | 0.998871    | 0.995489     |
| Brain and nervous system cancer [Data Rich] | Male   | 0-6 days    | 95+ years | 0.216468            | 0.277928 | 0.168084 | 0.183155  | 0.998868    | 0.997924     |
| Brain and nervous system cancer [Global]    | Male   | 0-6 days    | 95+ years | 0.27435             | 0.374644 | 0.204471 | 0.20185   | 0.998951    | 0.996187     |
| Thyroid cancer [Data Rich]                  | Female | 10-14 years | 95+ years | 0.428862            | 0.514646 | 0.348096 | 0.339467  | 0.988448    | 0.986206     |

| Cause                            | Sex    | Age start   | Age end   | Predictive validity |          |          |           |             |              |
|----------------------------------|--------|-------------|-----------|---------------------|----------|----------|-----------|-------------|--------------|
|                                  |        |             |           | RMSE in             | RMSE out | Trend in | Trend out | Coverage in | Coverage out |
| Thyroid cancer [Data Rich]       | Male   | 10-14 years | 95+ years | 0.325439            | 0.400471 | 0.258836 | 0.251195  | 0.990913    | 0.991523     |
| Thyroid cancer [Global]          | Female | 10-14 years | 95+ years | 0.452233            | 0.57687  | 0.360692 | 0.356627  | 0.990555    | 0.981127     |
| Thyroid cancer [Global]          | Male   | 10-14 years | 95+ years | 0.365192            | 0.48212  | 0.280751 | 0.28231   | 0.992984    | 0.989187     |
| Mesothelioma [Data Rich]         | Female | 15-19 years | 95+ years | 0.196941            | 0.304164 | 0.152358 | 0.219033  | 0.998746    | 0.998454     |
| Mesothelioma [Data Rich]         | Male   | 15-19 years | 95+ years | 0.172967            | 0.285052 | 0.128708 | 0.171164  | 0.999971    | 0.999797     |
| Mesothelioma [Global]            | Male   | 15-19 years | 95+ years | 0.241276            | 0.464505 | 0.185143 | 0.181593  | 0.999543    | 0.989174     |
| Mesothelioma [Global]            | Female | 15-19 years | 95+ years | 0.260519            | 0.427073 | 0.202264 | 0.205672  | 0.998568    | 0.995729     |
| Hodgkin lymphoma [Data Rich]     | Male   | 0-6 days    | 95+ years | 0.350903            | 0.46589  | 0.27357  | 0.318263  | 0.99713     | 0.947085     |
| Hodgkin lymphoma [Data Rich]     | Female | 0-6 days    | 95+ years | 0.446449            | 0.618172 | 0.339263 | 0.421206  | 0.960309    | 0.961281     |
| Hodgkin lymphoma [Global]        | Male   | 0-6 days    | 95+ years | 0.418144            | 0.544918 | 0.308703 | 0.308167  | 0.998369    | 0.99283      |
| Hodgkin lymphoma [Global]        | Female | 0-6 days    | 95+ years | 0.590103            | 0.786115 | 0.402028 | 0.406353  | 0.972256    | 0.963972     |
| Non-Hodgkin lymphoma [Data Rich] | Male   | 0-6 days    | 95+ years | 0.257262            | 0.319446 | 0.198048 | 0.224728  | 0.998985    | 0.998708     |
| Non-Hodgkin lymphoma [Data Rich] | Female | 0-6 days    | 95+ years | 0.267228            | 0.346181 | 0.210521 | 0.242819  | 0.998808    | 0.998423     |
| Non-Hodgkin lymphoma [Global]    | Male   | 0-6 days    | 95+ years | 0.294371            | 0.40601  | 0.217911 | 0.227594  | 0.998919    | 0.992808     |
| Non-Hodgkin lymphoma [Global]    | Female | 0-6 days    | 95+ years | 0.300954            | 0.416656 | 0.228722 | 0.233181  | 0.998752    | 0.993317     |
| Multiple myeloma [Data           | Male   | 15-19       | 95+       | 0.229224            | 0.274483 | 0.181391 | 0.198275  | 0.999263    | 0.998586     |

| Cause                               | Sex    | Age start   | Age end   | Predictive validity |          |          |           |             |              |
|-------------------------------------|--------|-------------|-----------|---------------------|----------|----------|-----------|-------------|--------------|
|                                     |        |             |           | RMSE in             | RMSE out | Trend in | Trend out | Coverage in | Coverage out |
| Rich]                               |        | years       | years     |                     |          |          |           |             |              |
| Multiple myeloma [Data Rich]        | Female | 15-19 years | 95+ years | 0.239102            | 0.290048 | 0.187379 | 0.216489  | 0.999277    | 0.998797     |
| Multiple myeloma [Global]           | Male   | 15-19 years | 95+ years | 0.273879            | 0.3742   | 0.206672 | 0.211225  | 0.999194    | 0.994302     |
| Multiple myeloma [Global]           | Female | 15-19 years | 95+ years | 0.277053            | 0.38199  | 0.206454 | 0.209223  | 0.999174    | 0.996651     |
| Leukemia [Data Rich]                | Female | 0-6 days    | 95+ years | 0.232168            | 0.285674 | 0.190505 | 0.222964  | 0.997925    | 0.996086     |
| Leukemia [Data Rich]                | Male   | 0-6 days    | 95+ years | 0.218797            | 0.271475 | 0.178922 | 0.207808  | 0.998391    | 0.99703      |
| Leukemia [Global]                   | Female | 0-6 days    | 95+ years | 0.283536            | 0.361995 | 0.242014 | 0.242573  | 0.99865     | 0.993203     |
| Leukemia [Global]                   | Male   | 0-6 days    | 95+ years | 0.294539            | 0.379    | 0.275613 | 0.270439  | 0.997571    | 0.992988     |
| Other leukemia [Data Rich]          | Female | 0-6 days    | 95+ years | 0.3508              | 0.490285 | 0.278612 | 0.300191  | 0.996341    | 0.993081     |
| Other leukemia [Data Rich]          | Male   | 0-6 days    | 95+ years | 0.282754            | 0.349516 | 0.239149 | 0.221327  | 0.998039    | 0.995322     |
| Other leukemia [Global]             | Female | 0-6 days    | 95+ years | 0.413955            | 0.570583 | 0.311448 | 0.31415   | 0.997038    | 0.983931     |
| Other leukemia [Global]             | Male   | 0-6 days    | 95+ years | 0.34794             | 0.480636 | 0.275768 | 0.263252  | 0.998417    | 0.987829     |
| Acute lymphoid leukemia [Data Rich] | Female | 0-6 days    | 95+ years | 0.245042            | 0.343861 | 0.199697 | 0.196121  | 0.999735    | 0.998677     |
| Acute lymphoid leukemia [Data Rich] | Male   | 0-6 days    | 95+ years | 0.232196            | 0.322463 | 0.192678 | 0.180934  | 0.999027    | 0.997797     |
| Acute lymphoid leukemia [Global]    | Female | 0-6 days    | 95+ years | 0.292299            | 0.430489 | 0.219397 | 0.219718  | 0.999584    | 0.995845     |
| Acute lymphoid leukemia [Global]    | Male   | 0-6 days    | 95+ years | 0.258168            | 0.380972 | 0.20477  | 0.202271  | 0.999191    | 0.996156     |

| Cause                                                          | Sex    | Age start   | Age end   | Predictive validity |          |          |           |             |              |
|----------------------------------------------------------------|--------|-------------|-----------|---------------------|----------|----------|-----------|-------------|--------------|
|                                                                |        |             |           | RMSE in             | RMSE out | Trend in | Trend out | Coverage in | Coverage out |
| Chronic lymphoid leukemia [Data Rich]                          | Male   | 15-19 years | 95+ years | 0.264066            | 0.422453 | 0.205004 | 0.200284  | 0.998068    | 0.99624      |
| Chronic lymphoid leukemia [Data Rich]                          | Female | 15-19 years | 95+ years | 0.229014            | 0.365306 | 0.185879 | 0.188733  | 0.997496    | 0.995669     |
| Chronic lymphoid leukemia [Global]                             | Male   | 15-19 years | 95+ years | 0.281442            | 0.49744  | 0.21614  | 0.218752  | 0.997518    | 0.992235     |
| Chronic lymphoid leukemia [Global]                             | Female | 15-19 years | 95+ years | 0.268922            | 0.428058 | 0.20953  | 0.209509  | 0.997841    | 0.991753     |
| Acute myeloid leukemia [Data Rich]                             | Female | 0-6 days    | 95+ years | 0.243902            | 0.359063 | 0.198629 | 0.202072  | 0.999145    | 0.99819      |
| Acute myeloid leukemia [Data Rich]                             | Male   | 0-6 days    | 95+ years | 0.232648            | 0.331949 | 0.175921 | 0.178595  | 0.999717    | 0.999322     |
| Acute myeloid leukemia [Global]                                | Male   | 0-6 days    | 95+ years | 0.265031            | 0.360267 | 0.184561 | 0.180444  | 0.99956     | 0.995375     |
| Acute myeloid leukemia [Global]                                | Female | 0-6 days    | 95+ years | 0.281417            | 0.410413 | 0.213481 | 0.218102  | 0.999242    | 0.994128     |
| Chronic myeloid leukemia [Data Rich]                           | Female | 28-364 days | 95+ years | 0.257258            | 0.362538 | 0.219213 | 0.209664  | 0.999697    | 0.998442     |
| Chronic myeloid leukemia [Global]                              | Female | 28-364 days | 95+ years | 0.295483            | 0.439364 | 0.230637 | 0.214173  | 0.99951     | 0.996227     |
| Chronic myeloid leukemia [Global]                              | Male   | 28-364 days | 95+ years | 0.27712             | 0.436653 | 0.219288 | 0.215423  | 0.999912    | 0.997674     |
| Chronic myeloid leukemia [Data Rich]                           | Male   | 28-364 days | 95+ years | 0.247795            | 0.36944  | 0.21216  | 0.201106  | 0.999952    | 0.999142     |
| Non-melanoma skin cancer (squamous-cell carcinoma) [Data Rich] | Male   | 28-364 days | 95+ years | 0.154952            | 0.235392 | 0.111747 | 0.134674  | 0.999782    | 0.999627     |
| Non-melanoma skin cancer (squamous-cell carcinoma) [Data Rich] | Female | 28-364 days | 95+ years | 0.21458             | 0.296797 | 0.160927 | 0.184583  | 0.997336    | 0.997268     |
| Non-melanoma skin cancer                                       | Male   | 28-364      | 95+       | 0.186211            | 0.307069 | 0.133081 | 0.13346   | 0.999225    | 0.993893     |

| Cause                                                       | Sex    | Age start   | Age end   | Predictive validity |          |          |           |             |              |
|-------------------------------------------------------------|--------|-------------|-----------|---------------------|----------|----------|-----------|-------------|--------------|
|                                                             |        |             |           | RMSE in             | RMSE out | Trend in | Trend out | Coverage in | Coverage out |
| (squamous-cell carcinoma) [Global]                          |        | days        | years     |                     |          |          |           |             |              |
| Non-melanoma skin cancer (squamous-cell carcinoma) [Global] | Female | 28-364 days | 95+ years | 0.27535             | 0.449328 | 0.203049 | 0.202074  | 0.996456    | 0.987022     |
| Other neoplasms [Data Rich]                                 | Male   | 0-6 days    | 95+ years | 0.256396            | 0.315719 | 0.217052 | 0.239815  | 0.993394    | 0.988905     |
| Other neoplasms [Data Rich]                                 | Female | 0-6 days    | 95+ years | 0.266244            | 0.330966 | 0.224429 | 0.255028  | 0.993927    | 0.989754     |
| Other neoplasms [Global]                                    | Female | 0-6 days    | 95+ years | 0.287964            | 0.370172 | 0.237436 | 0.240632  | 0.995797    | 0.992799     |
| Other neoplasms [Global]                                    | Male   | 0-6 days    | 95+ years | 0.277797            | 0.363343 | 0.227826 | 0.234498  | 0.995245    | 0.992186     |

eTable 11: Percent change before and after CodCorrect by cancer for all ages, both sexes combined, 2016

| Cause                                | CodCorrect level | Percent change (%)     |
|--------------------------------------|------------------|------------------------|
| Neoplasms                            | 2                | -1.19 (-2.61 to 0.59)  |
| Esophageal cancer                    | 3                | -1.39 (-2.6 to 0.19)   |
| Stomach cancer                       | 3                | -1.88 (-3.12 to -0.25) |
| Liver cancer                         | 3                | -1.2 (-2.69 to 1.12)   |
| Liver cancer due to hepatitis B      | 4                | -0.59 (-2.21 to 2.08)  |
| Liver cancer due to hepatitis C      | 4                | -2.59 (-3.98 to -0.86) |
| Liver cancer due to alcohol use      | 4                | -1.87 (-3.7 to 0.33)   |
| Liver cancer due to other causes     | 4                | -0.65 (-2.07 to 1.69)  |
| Larynx cancer                        | 3                | -0.77 (-2.33 to 1.03)  |
| Tracheal, bronchus, and lung cancer  | 3                | -2.23 (-3.42 to -0.62) |
| Breast cancer                        | 3                | -0.37 (-2.34 to 1.76)  |
| Cervical cancer                      | 3                | 3.5 (0.72 to 6.15)     |
| Uterine cancer                       | 3                | 0.05 (-2.11 to 1.94)   |
| Prostate cancer                      | 3                | -0.98 (-2.71 to 0.95)  |
| Colon and rectum cancer              | 3                | -1.95 (-3.4 to -0.16)  |
| Lip and oral cavity cancer           | 3                | -0.39 (-2.3 to 1.54)   |
| Nasopharynx cancer                   | 3                | 0.26 (-1.36 to 3.21)   |
| Other pharynx cancer                 | 3                | 0.94 (-1.74 to 2.85)   |
| Gallbladder and biliary tract cancer | 3                | -2.65 (-4.45 to -0.79) |
| Pancreatic cancer                    | 3                | -2.11 (-3.57 to -0.34) |
| Malignant skin melanoma              | 3                | -0.7 (-2.07 to 0.99)   |
| Non-melanoma skin cancer             | 3                | -1.85 (-3.14 to -0.14) |
| Ovarian cancer                       | 3                | -0.37 (-2.32 to 1.5)   |
| Testicular cancer                    | 3                | 4.01 (1.79 to 7.54)    |
| Kidney cancer                        | 3                | -1.83 (-3.18 to -0.23) |
| Bladder cancer                       | 3                | -2.19 (-3.56 to -0.52) |
| Brain and nervous system cancer      | 3                | -0.24 (-1.96 to 2.3)   |
| Thyroid cancer                       | 3                | 0.67 (-1.23 to 2.44)   |
| Mesothelioma                         | 3                | -1.14 (-2.49 to 0.61)  |
| Hodgkin lymphoma                     | 3                | 2.55 (0.15 to 5.06)    |
| Non-Hodgkin lymphoma                 | 3                | -0.01 (-1.7 to 1.88)   |
| Multiple myeloma                     | 3                | -1.25 (-2.68 to 0.36)  |
| Leukemia                             | 3                | -0.42 (-2.46 to 2.27)  |
| Other leukemia                       | 4                | 2.9 (-3.46 to 13.65)   |
| Acute lymphoid leukemia              | 4                | 1.81 (-5.35 to 11.97)  |
| Chronic lymphoid leukemia            | 4                | 0.02 (-5.76 to 4.86)   |
| Acute myeloid leukemia               | 4                | 1.35 (-3.24 to 7.78)   |

| <b>Cause</b>                                       | <b>CodCorrect level</b> | <b>Percent change (%)</b> |
|----------------------------------------------------|-------------------------|---------------------------|
| Chronic myeloid leukemia                           | 4                       | 6.01 (-0.31 to 12.87)     |
| Non-melanoma skin cancer (squamous-cell carcinoma) | 4                       | -14.59 (-17.41 to -12.46) |
| Other neoplasms                                    | 3                       | 0.34 (-1.28 to 2.57)      |



eTable 12: Duration of four prevalence phases by cancer

|                                    | Diagnosis/<br>Treatment<br>(months) | Remission                                                                        | Disseminated/metastatic<br>(months)                               | Note                                                              | Terminal<br>(months) |
|------------------------------------|-------------------------------------|----------------------------------------------------------------------------------|-------------------------------------------------------------------|-------------------------------------------------------------------|----------------------|
| Esophageal cancer                  | 5 <sup>30</sup>                     | Calculated based on<br>remainder of time after<br>attributing other<br>sequelae. | 4.6 <sup>31</sup>                                                 | SEER Summary Stage 1997 (Distant<br>site/node involved) 1995-2000 | 1 months             |
| Stomach cancer                     | 5.2 <sup>30</sup>                   |                                                                                  | 3.88 <sup>31</sup>                                                | SEER Summary Stage 1997 (Distant<br>site/node involved) 1995-2000 |                      |
| Liver cancer                       | 4                                   |                                                                                  | 2.51 <sup>31</sup>                                                | SEER Summary Stage 1997 (Distant<br>site/node involved) 1995-2000 |                      |
| Larynx cancer                      | 5.3 <sup>30</sup>                   |                                                                                  | 8.84 <sup>31</sup>                                                | SEER Stage IVc                                                    |                      |
| Lung cancer                        | 3.3 <sup>32</sup>                   |                                                                                  | 4.51 <sup>31</sup>                                                | SEER Summary Stage 1997 (Distant<br>site/node involved) 1995-2000 |                      |
| Breast cancer                      | 3 <sup>32</sup>                     |                                                                                  | 17.7 <sup>31</sup>                                                | SEER Summary Stage 1997 (Distant<br>site/node involved) 1995-2000 |                      |
| Cervical cancer                    | 4.8 <sup>30</sup>                   |                                                                                  | 9.21 <sup>31</sup>                                                | SEER Summary Stage 1997 (Distant<br>site/node involved) 1995-2000 |                      |
| Uterine cancer                     | 4.6 <sup>30</sup>                   |                                                                                  | 11.6 <sup>31</sup>                                                | SEER Summary Stage 1997 (Distant<br>site/node involved) 1995-2000 |                      |
| Prostate cancer                    | 4 <sup>32</sup>                     |                                                                                  | 30.35 <sup>31</sup>                                               | SEER Summary Stage 1997 (Distant<br>site/node involved) 1995-2000 |                      |
| Colorectal cancer                  | 4 <sup>32</sup>                     |                                                                                  | 9.69 <sup>31</sup>                                                | SEER Summary Stage 1997 (Distant<br>site/node involved) 1995-2000 |                      |
| Oral cancer                        | 5.3 <sup>30</sup>                   |                                                                                  | 9.33 <sup>31</sup>                                                | SEER Stage IVc                                                    |                      |
| Nasopharyngeal<br>cancer           | 5.3 <sup>30</sup>                   |                                                                                  | 13.19 <sup>31</sup>                                               | SEER Stage IVc                                                    |                      |
| Cancer of other part<br>of pharynx | 5.3 <sup>30</sup>                   |                                                                                  | 7.91 <sup>31</sup>                                                | SEER Stage IVc                                                    |                      |
| Gallbladder cancer                 | 4                                   |                                                                                  | 3.47 <sup>31</sup>                                                | SEER Summary Stage 1997 (Distant<br>site/node involved) 1995-2000 |                      |
| Pancreas cancer                    | 4.1 <sup>30</sup>                   | 2.54 <sup>31</sup>                                                               | SEER Summary Stage 1997 (Distant<br>site/node involved) 1995-2000 |                                                                   |                      |

|                                | Diagnosis/<br>Treatment<br>(months) | Remission | Disseminated/metastatic<br>(months) | Note                                                                          | Terminal<br>(months) |
|--------------------------------|-------------------------------------|-----------|-------------------------------------|-------------------------------------------------------------------------------|----------------------|
| Melanoma                       | 2.9 <sup>33</sup>                   |           | 7.18 <sup>31</sup>                  | SEER Summary Stage 1997 (Distant site/node involved) 1995-2000                |                      |
| NMSC (squamous cell carcinoma) | 2.9 <sup>33</sup>                   |           | 17 <sup>34</sup>                    |                                                                               |                      |
| Ovarian cancer                 | 3.2 <sup>32</sup>                   |           | 25.6 <sup>31</sup>                  | SEER Summary Stage 1997 (Distant site/node involved) 1995-2000                |                      |
| Testicular cancer              | 3.7 <sup>30</sup>                   |           | 19.47 <sup>31</sup>                 | SEER Stage III                                                                |                      |
| Kidney cancer                  | 5.3 <sup>30</sup>                   |           | 5.38 <sup>31</sup>                  | SEER Summary Stage 1997 (Distant site/node involved) 1995-2000                |                      |
| Bladder cancer                 | 5.1 <sup>30</sup>                   |           | 5.8 <sup>31</sup>                   | SEER Summary Stage 1997 (Distant site/node involved) 1995-2000                |                      |
| Brain cancer                   | 5                                   |           | 6.93 <sup>31</sup>                  | SEER Median age standardized survival all patients, all years                 |                      |
| Thyroid cancer                 | 3                                   |           | 19.39 <sup>31</sup>                 | SEER Stage IVc                                                                |                      |
| Mesothelioma                   | 4                                   |           | 7.75 <sup>31</sup>                  | SEER Summary Stage 1997 (Distant site/node involved) 1995-2000                |                      |
| Hodgkin lymphoma               | 3.7 <sup>32</sup>                   |           | 26 <sup>35</sup>                    |                                                                               |                      |
| Non Hodgkin lymphoma           | 3.7 <sup>32</sup>                   |           | 7.7 <sup>35</sup>                   |                                                                               |                      |
| Multiple myeloma               | 7 <sup>30</sup>                     |           | 36.82 <sup>31</sup>                 | SEER Median age standardized survival all patients, all years                 |                      |
| Leukemia <sup>30</sup>         | 5                                   |           | 43.67 <sup>31</sup>                 | SEER Median age standardized survival all patients, all years                 |                      |
| ALL                            | 12                                  |           | 7.02 <sup>31</sup>                  | SEER Median age standardized survival all patients, all years                 |                      |
| AML                            | 6                                   |           | 4.6 <sup>31</sup>                   | SEER Median age standardized survival all patients, all years                 |                      |
| CLL                            | 6                                   |           | 48 <sup>36</sup>                    |                                                                               |                      |
| CML                            | 6                                   |           | 4.6 <sup>31</sup>                   | SEER Median age standardized survival for AML (patients with CML die in blast |                      |

|                | Diagnosis/<br>Treatment<br>(months)  | Remission | Disseminated/metastatic<br>(months) | Note                                                          | Terminal<br>(months) |
|----------------|--------------------------------------|-----------|-------------------------------------|---------------------------------------------------------------|----------------------|
|                |                                      |           |                                     | crisis, which is treated like AML) all patients, all years    |                      |
| Other leukemia | 6                                    |           | 48 <sup>36</sup>                    |                                                               |                      |
| Other          | 4.4 (mean of other cancer durations) |           | 15.81 <sup>31</sup>                 | SEER Median age standardized survival all patients, all years |                      |

*eTable 13: Disability weights*

| <b>Health state</b>                   | <b>Lay description</b>                                                                                                                                                       | <b>Estimate</b> | <b>Uncertainty interval</b> |       |
|---------------------------------------|------------------------------------------------------------------------------------------------------------------------------------------------------------------------------|-----------------|-----------------------------|-------|
| Cancer, diagnosis and primary therapy | Has pain, nausea, fatigue, weight loss and high anxiety.                                                                                                                     | 0.288           | 0.193                       | 0.399 |
| Cancer, controlled phase              | Has a chronic disease that requires medication every day and causes some worry but minimal interference with daily activities.                                               | 0.049           | 0.031                       | 0.072 |
| Cancer, metastatic                    | Has severe pain, extreme fatigue, weight loss and high anxiety.                                                                                                              | 0.451           | 0.307                       | 0.600 |
| Terminal phase, with medication       | Has lost a lot of weight and regularly uses strong medication to avoid constant pain. The person has no appetite, feels nauseous, and needs to spend most of the day in bed. | 0.540           | 0.377                       | 0.687 |
| Mastectomy                            | Had one of the breasts removed and sometimes has pain or swelling in the arms.                                                                                               | 0.036           | 0.020                       | 0.057 |
| Stoma                                 | Has a pouch attached to an opening in the belly to collect and empty stools.                                                                                                 | 0.095           | 0.063                       | 0.131 |
| Laryngectomy                          | Has difficulty speaking, and others find it difficult to understand.                                                                                                         | 0.051           | 0.032                       | 0.078 |
| Urinary incontinence                  | Cannot control urinating.                                                                                                                                                    | 0.139           | 0.094                       | 0.198 |
| Impotence                             | Has difficulty in obtaining or maintaining an erection.                                                                                                                      | 0.017           | 0.009                       | 0.030 |

eTable 14: Decomposition of trends in incidence globally, and by SDI quintile, both sexes, 2006 to 2016

| Location        |                            | Incidence cases, No.               |                                    | Expected incidence cases, 2016, No. |                                   | Change in incidence cases, 1990 to 2016, % |                                |                                 | Overall change, % |
|-----------------|----------------------------|------------------------------------|------------------------------------|-------------------------------------|-----------------------------------|--------------------------------------------|--------------------------------|---------------------------------|-------------------|
|                 |                            | 2006                               | 2016                               | Given population growth alone       | Given population growth and aging | Due to population growth                   | Due to change in age structure | Due to change in incidence rate |                   |
| Global          | Neoplasms                  | 13414991<br>(13035144 to 13851075) | 17227632<br>(16712769 to 17802548) | 15082343                            | 17367274                          | 12.4                                       | 17                             | -1                              | 28.4              |
| High SDI        | Neoplasms                  | 5844162<br>(5583309 to 6160012)    | 7031745<br>(6704656 to 7398378)    | 6156321                             | 7080101                           | 5.3                                        | 15.8                           | -0.8                            | 20.3              |
| High-middle SDI | Neoplasms                  | 2550090<br>(2507380 to 2604682)    | 3349475<br>(3258731 to 3460355)    | 2833196                             | 3248231                           | 11.1                                       | 16.3                           | 4                               | 31.3              |
| Middle SDI      | Neoplasms                  | 3335555<br>(3252321 to 3409296)    | 4598970<br>(4478183 to 4725368)    | 3580523                             | 4413440                           | 7.3                                        | 25                             | 5.6                             | 37.9              |
| Low-middle SDI  | Neoplasms                  | 1346658<br>(1304402 to 1385677)    | 1784107<br>(1744975 to 1823028)    | 1570501                             | 1776791                           | 16.6                                       | 15.3                           | 0.5                             | 32.5              |
| Low SDI         | Neoplasms                  | 335133<br>(302282 to 354854)       | 442185<br>(395504 to 463281)       | 443392                              | 453927                            | 32.3                                       | 3.1                            | -3.5                            | 31.9              |
| Global          | Lip and oral cavity cancer | 287037<br>(283253 to 291135)       | 381974<br>(370715 to 392125)       | 322712                              | 369080                            | 12.4                                       | 16.2                           | 4.5                             | 33.1              |
| High SDI        | Lip and oral cavity cancer | 71667<br>(70595 to 72790)          | 85014<br>(81846 to 88201)          | 75494                               | 85567                             | 5.3                                        | 14.1                           | -0.8                            | 18.6              |

| Location        |                            | Incidence cases, No.        |                              | Expected incidence cases, 2016, No. |                                   | Change in incidence cases, 1990 to 2016, % |                                |                                 | Overall change, % |
|-----------------|----------------------------|-----------------------------|------------------------------|-------------------------------------|-----------------------------------|--------------------------------------------|--------------------------------|---------------------------------|-------------------|
|                 |                            | 2006                        | 2016                         | Given population growth alone       | Given population growth and aging | Due to population growth                   | Due to change in age structure | Due to change in incidence rate |                   |
| High-middle SDI | Lip and oral cavity cancer | 40566<br>(39454 to 41788)   | 49913<br>(47666 to 52321)    | 45069                               | 52170                             | 11.1                                       | 17.5                           | -5.6                            | 23                |
| Middle SDI      | Lip and oral cavity cancer | 67999<br>(66996 to 69014)   | 98889<br>(94382 to 101678)   | 72993                               | 90221                             | 7.3                                        | 25.3                           | 12.7                            | 45.4              |
| Low-middle SDI  | Lip and oral cavity cancer | 100832<br>(98310 to 103446) | 140674<br>(133355 to 146157) | 117592                              | 133925                            | 16.6                                       | 16.2                           | 6.7                             | 39.5              |
| Low SDI         | Lip and oral cavity cancer | 7624<br>(7309 to 8080)      | 10550<br>(10205 to 10931)    | 10086                               | 10368                             | 32.3                                       | 3.7                            | 2.4                             | 38.4              |
| Global          | Nasopharynx cancer         | 88213<br>(85305 to 90956)   | 95608<br>(90817 to 101115)   | 99177                               | 107805                            | 12.4                                       | 9.8                            | -13.8                           | 8.4               |
| High SDI        | Nasopharynx cancer         | 10108<br>(9808 to 10434)    | 10103<br>(9621 to 10742)     | 10648                               | 11427                             | 5.3                                        | 7.7                            | -13.1                           | 0                 |
| High-middle SDI | Nasopharynx cancer         | 23257<br>(21902 to 24667)   | 24346<br>(21962 to 26853)    | 25838                               | 28216                             | 11.1                                       | 10.2                           | -16.6                           | 4.7               |
| Middle SDI      | Nasopharynx cancer         | 37082<br>(35912 to 38292)   | 39310<br>(36836 to 41715)    | 39805                               | 45313                             | 7.3                                        | 14.9                           | -16.2                           | 6                 |
| Low-middle SDI  | Nasopharynx cancer         | 14512<br>(13320 to 15513)   | 17671<br>(16747 to 18542)    | 16924                               | 18750                             | 16.6                                       | 12.6                           | -7.4                            | 21.8              |

| Location        |                      | Incidence cases, No.         |                              | Expected incidence cases, 2016, No. |                                   | Change in incidence cases, 1990 to 2016, % |                                |                                 | Overall change, % |
|-----------------|----------------------|------------------------------|------------------------------|-------------------------------------|-----------------------------------|--------------------------------------------|--------------------------------|---------------------------------|-------------------|
|                 |                      | 2006                         | 2016                         | Given population growth alone       | Given population growth and aging | Due to population growth                   | Due to change in age structure | Due to change in incidence rate |                   |
| Low SDI         | Nasopharynx cancer   | 2970<br>(2534 to 3470)       | 3811<br>(3373 to 4408)       | 3928                                | 4012                              | 32.3                                       | 2.8                            | -6.8                            | 28.3              |
| Global          | Other pharynx cancer | 124249<br>(121736 to 126963) | 169552<br>(159409 to 175514) | 139692                              | 160851                            | 12.4                                       | 17                             | 7                               | 36.5              |
| High SDI        | Other pharynx cancer | 35013<br>(34405 to 35596)    | 44631<br>(42482 to 45851)    | 36883                               | 41224                             | 5.3                                        | 12.4                           | 9.7                             | 27.5              |
| High-middle SDI | Other pharynx cancer | 17545<br>(16978 to 18134)    | 23861<br>(22788 to 24968)    | 19492                               | 22871                             | 11.1                                       | 19.3                           | 5.6                             | 36                |
| Middle SDI      | Other pharynx cancer | 21785<br>(21224 to 22321)    | 32723<br>(29186 to 34705)    | 23385                               | 29246                             | 7.3                                        | 26.9                           | 16                              | 50.2              |
| Low-middle SDI  | Other pharynx cancer | 48308<br>(46042 to 50836)    | 66970<br>(60455 to 71169)    | 56338                               | 64686                             | 16.6                                       | 17.3                           | 4.7                             | 38.6              |
| Low SDI         | Other pharynx cancer | 2748<br>(2532 to 3045)       | 3516<br>(3297 to 3855)       | 3635                                | 3721                              | 32.3                                       | 3.1                            | -7.5                            | 27.9              |
| Global          | Esophageal cancer    | 413137<br>(407522 to 418815) | 442599<br>(433254 to 456192) | 464485                              | 540391                            | 12.4                                       | 18.4                           | -23.7                           | 7.1               |
| High SDI        | Esophageal cancer    | 72614<br>(71745 to 73451)    | 86401<br>(81501 to 90840)    | 76492                               | 88543                             | 5.3                                        | 16.6                           | -3                              | 19                |

| Location        |                   | Incidence cases, No.           |                                 | Expected incidence cases, 2016, No. |                                   | Change in incidence cases, 1990 to 2016, % |                                |                                 | Overall change, % |
|-----------------|-------------------|--------------------------------|---------------------------------|-------------------------------------|-----------------------------------|--------------------------------------------|--------------------------------|---------------------------------|-------------------|
|                 |                   | 2006                           | 2016                            | Given population growth alone       | Given population growth and aging | Due to population growth                   | Due to change in age structure | Due to change in incidence rate |                   |
| High-middle SDI | Esophageal cancer | 75851<br>(73953 to 77630)      | 83187<br>(80195 to 87238)       | 84271                               | 98643                             | 11.1                                       | 18.9                           | -20.4                           | 9.7               |
| Middle SDI      | Esophageal cancer | 202143<br>(198105 to 206114)   | 197973<br>(192251 to 203503)    | 216988                              | 277435                            | 7.3                                        | 29.9                           | -39.3                           | -2.1              |
| Low-middle SDI  | Esophageal cancer | 46543<br>(45586 to 47579)      | 54670<br>(53263 to 56187)       | 54279                               | 62523                             | 16.6                                       | 17.7                           | -16.9                           | 17.5              |
| Low SDI         | Esophageal cancer | 12164<br>(11791 to 12531)      | 16670<br>(16047 to 17426)       | 16093                               | 16515                             | 32.3                                       | 3.5                            | 1.3                             | 37                |
| Global          | Stomach cancer    | 1002458<br>(991851 to 1013372) | 1156619<br>(1134360 to 1179828) | 1127053                             | 1307918                           | 12.4                                       | 18                             | -15.1                           | 15.4              |
| High SDI        | Stomach cancer    | 254241<br>(251114 to 257474)   | 292834<br>(286623 to 299363)    | 267820                              | 314185                            | 5.3                                        | 18.2                           | -8.4                            | 15.2              |
| High-middle SDI | Stomach cancer    | 218180<br>(213700 to 222909)   | 243582<br>(233757 to 253492)    | 242402                              | 279723                            | 11.1                                       | 17.1                           | -16.6                           | 11.6              |
| Middle SDI      | Stomach cancer    | 383988<br>(377257 to 390982)   | 454079<br>(438498 to 472218)    | 412188                              | 521010                            | 7.3                                        | 28.3                           | -17.4                           | 18.3              |
| Low-middle SDI  | Stomach cancer    | 122088<br>(119484 to 124655)   | 136618<br>(132677 to 140958)    | 142382                              | 163468                            | 16.6                                       | 17.3                           | -22                             | 11.9              |



| Location        |                         | Incidence cases, No.            |                                 | Expected incidence cases, 2016, No. |                                   | Change in incidence cases, 1990 to 2016, % |                                |                                 | Overall change, % |
|-----------------|-------------------------|---------------------------------|---------------------------------|-------------------------------------|-----------------------------------|--------------------------------------------|--------------------------------|---------------------------------|-------------------|
|                 |                         | 2006                            | 2016                            | Given population growth alone       | Given population growth and aging | Due to population growth                   | Due to change in age structure | Due to change in incidence rate |                   |
| Low SDI         | Stomach cancer          | 20531<br>(19126 to 21663)       | 23595<br>(22200 to 24713)       | 27162                               | 27907                             | 32.3                                       | 3.6                            | -21                             | 14.9              |
| Global          | Colon and rectum cancer | 1282348<br>(1268339 to 1297474) | 1715539<br>(1657957 to 1794936) | 1441731                             | 1687411                           | 12.4                                       | 19.2                           | 2.2                             | 33.8              |
| High SDI        | Colon and rectum cancer | 659083<br>(652434 to 665608)    | 792174<br>(769351 to 838150)    | 694286                              | 813077                            | 5.3                                        | 18                             | -3.2                            | 20.2              |
| High-middle SDI | Colon and rectum cancer | 282411<br>(274326 to 288783)    | 383658<br>(367341 to 407234)    | 313764                              | 363506                            | 11.1                                       | 17.6                           | 7.1                             | 35.9              |
| Middle SDI      | Colon and rectum cancer | 248440<br>(242662 to 253275)    | 404279<br>(385990 to 419500)    | 266686                              | 334579                            | 7.3                                        | 27.3                           | 28.1                            | 62.7              |
| Low-middle SDI  | Colon and rectum cancer | 78300<br>(75914 to 82221)       | 112741<br>(106546 to 116574)    | 91315                               | 104709                            | 16.6                                       | 17.1                           | 10.3                            | 44                |
| Low SDI         | Colon and rectum cancer | 16787<br>(15637 to 19181)       | 23337<br>(22545 to 24418)       | 22210                               | 22888                             | 32.3                                       | 4                              | 2.7                             | 39                |
| Global          | Liver cancer            | 732483<br>(701581 to 746688)    | 1007763<br>(953287 to 1042211)  | 823523                              | 940885                            | 12.4                                       | 16                             | 9.1                             | 37.6              |
| High SDI        | Liver cancer            | 138232<br>(135756 to 140834)    | 189298<br>(177696 to 197225)    | 145615                              | 167624                            | 5.3                                        | 15.9                           | 15.7                            | 36.9              |

| Location        |                                      | Incidence cases, No.         |                              | Expected incidence cases, 2016, No. |                                   | Change in incidence cases, 1990 to 2016, % |                                |                                 | Overall change, % |
|-----------------|--------------------------------------|------------------------------|------------------------------|-------------------------------------|-----------------------------------|--------------------------------------------|--------------------------------|---------------------------------|-------------------|
|                 |                                      | 2006                         | 2016                         | Given population growth alone       | Given population growth and aging | Due to population growth                   | Due to change in age structure | Due to change in incidence rate |                   |
| High-middle SDI | Liver cancer                         | 130254<br>(125569 to 134793) | 194089<br>(180351 to 207681) | 144714                              | 166017                            | 11.1                                       | 16.4                           | 21.6                            | 49                |
| Middle SDI      | Liver cancer                         | 357944<br>(340304 to 367714) | 487481<br>(463750 to 508119) | 384232                              | 474882                            | 7.3                                        | 25.3                           | 3.5                             | 36.2              |
| Low-middle SDI  | Liver cancer                         | 73832<br>(67819 to 79856)    | 91647<br>(83575 to 97266)    | 86104                               | 98131                             | 16.6                                       | 16.3                           | -8.8                            | 24.1              |
| Low SDI         | Liver cancer                         | 23969<br>(21231 to 25947)    | 31746<br>(28098 to 33777)    | 31712                               | 32518                             | 32.3                                       | 3.4                            | -3.2                            | 32.4              |
| Global          | Gallbladder and biliary tract cancer | 152248<br>(141517 to 159461) | 183711<br>(168547 to 193180) | 171171                              | 201386                            | 12.4                                       | 19.8                           | -11.6                           | 20.7              |
| High SDI        | Gallbladder and biliary tract cancer | 61398<br>(58776 to 63059)    | 72183<br>(68266 to 76642)    | 64676                               | 77365                             | 5.3                                        | 20.7                           | -8.4                            | 17.6              |
| High-middle SDI | Gallbladder and biliary tract cancer | 28458<br>(25935 to 29730)    | 32726<br>(28817 to 35200)    | 31616                               | 37005                             | 11.1                                       | 18.9                           | -15                             | 15                |
| Middle SDI      | Gallbladder and biliary tract cancer | 33669<br>(29849 to 36924)    | 42850<br>(37142 to 46736)    | 36141                               | 45948                             | 7.3                                        | 29.1                           | -9.2                            | 27.3              |
| Low-middle SDI  | Gallbladder and biliary tract cancer | 24983<br>(22141 to 27891)    | 31439<br>(27789 to 34896)    | 29135                               | 33580                             | 16.6                                       | 17.8                           | -8.6                            | 25.8              |

| Location        |                                      | Incidence cases, No.         |                              | Expected incidence cases, 2016, No. |                                   | Change in incidence cases, 1990 to 2016, % |                                |                                 | Overall change, % |
|-----------------|--------------------------------------|------------------------------|------------------------------|-------------------------------------|-----------------------------------|--------------------------------------------|--------------------------------|---------------------------------|-------------------|
|                 |                                      | 2006                         | 2016                         | Given population growth alone       | Given population growth and aging | Due to population growth                   | Due to change in age structure | Due to change in incidence rate |                   |
| Low SDI         | Gallbladder and biliary tract cancer | 4052<br>(3431 to 4878)       | 4990<br>(4389 to 5771)       | 5360                                | 5500                              | 32.3                                       | 3.4                            | -12.6                           | 23.1              |
| Global          | Pancreatic cancer                    | 312537<br>(310229 to 314889) | 417680<br>(405672 to 425430) | 351381                              | 413049                            | 12.4                                       | 19.7                           | 1.5                             | 33.6              |
| High SDI        | Pancreatic cancer                    | 147245<br>(145232 to 148989) | 192036<br>(182535 to 198237) | 155109                              | 182964                            | 5.3                                        | 18.9                           | 6.2                             | 30.4              |
| High-middle SDI | Pancreatic cancer                    | 68565<br>(67476 to 69638)    | 88260<br>(84925 to 90768)    | 76177                               | 88654                             | 11.1                                       | 18.2                           | -0.6                            | 28.7              |
| Middle SDI      | Pancreatic cancer                    | 62675<br>(61609 to 63869)    | 89108<br>(88045 to 90133)    | 67277                               | 85532                             | 7.3                                        | 29.1                           | 5.7                             | 42.2              |
| Low-middle SDI  | Pancreatic cancer                    | 27893<br>(27369 to 28401)    | 39197<br>(38464 to 40066)    | 32529                               | 37684                             | 16.6                                       | 18.5                           | 5.4                             | 40.5              |
| Low SDI         | Pancreatic cancer                    | 6933<br>(6771 to 7126)       | 9879<br>(9597 to 10169)      | 9172                                | 9427                              | 32.3                                       | 3.7                            | 6.5                             | 42.5              |
| Global          | Larynx cancer                        | 153392<br>(151195 to 155828) | 186987<br>(183907 to 191334) | 172456                              | 200231                            | 12.4                                       | 18.1                           | -8.6                            | 21.9              |
| High SDI        | Larynx cancer                        | 45558<br>(44717 to 46472)    | 50478<br>(49151 to 51788)    | 47991                               | 54665                             | 5.3                                        | 14.6                           | -9.2                            | 10.8              |

| Location        |                                     | Incidence cases, No.            |                                 | Expected incidence cases, 2016, No. |                                   | Change in incidence cases, 1990 to 2016, % |                                |                                 | Overall change, % |
|-----------------|-------------------------------------|---------------------------------|---------------------------------|-------------------------------------|-----------------------------------|--------------------------------------------|--------------------------------|---------------------------------|-------------------|
|                 |                                     | 2006                            | 2016                            | Given population growth alone       | Given population growth and aging | Due to population growth                   | Due to change in age structure | Due to change in incidence rate |                   |
| High-middle SDI | Larynx cancer                       | 38381<br>(37469 to 39385)       | 43618<br>(42199 to 45040)       | 42641                               | 49872                             | 11.1                                       | 18.8                           | -16.3                           | 13.6              |
| Middle SDI      | Larynx cancer                       | 35090<br>(34551 to 35651)       | 49224<br>(47652 to 51000)       | 37666                               | 47770                             | 7.3                                        | 28.8                           | 4.1                             | 40.3              |
| Low-middle SDI  | Larynx cancer                       | 31326<br>(30006 to 32878)       | 39949<br>(38478 to 41915)       | 36533                               | 42189                             | 16.6                                       | 18.1                           | -7.2                            | 27.5              |
| Low SDI         | Larynx cancer                       | 4066<br>(3790 to 4431)          | 4862<br>(4564 to 5301)          | 5380                                | 5506                              | 32.3                                       | 3.1                            | -15.9                           | 19.6              |
| Global          | Tracheal, bronchus, and lung cancer | 1563344<br>(1545583 to 1579252) | 2007770<br>(1958410 to 2055318) | 1757652                             | 2047220                           | 12.4                                       | 18.5                           | -2.5                            | 28.4              |
| High SDI        | Tracheal, bronchus, and lung cancer | 618407<br>(611960 to 624620)    | 746752<br>(732332 to 763525)    | 651438                              | 756467                            | 5.3                                        | 17                             | -1.6                            | 20.8              |
| High-middle SDI | Tracheal, bronchus, and lung cancer | 329399<br>(323215 to 335892)    | 402342<br>(387257 to 419756)    | 365968                              | 424612                            | 11.1                                       | 17.8                           | -6.8                            | 22.1              |
| Middle SDI      | Tracheal, bronchus, and lung cancer | 482624<br>(472274 to 491832)    | 667965<br>(641926 to 691611)    | 518068                              | 657801                            | 7.3                                        | 29                             | 2.1                             | 38.4              |
| Low-middle SDI  | Tracheal, bronchus, and lung cancer | 114595<br>(110588 to 119003)    | 159990<br>(153662 to 165364)    | 133642                              | 154112                            | 16.6                                       | 17.9                           | 5.1                             | 39.6              |

| Location        |                                     | Incidence cases, No.           |                                 | Expected incidence cases, 2016, No. |                                   | Change in incidence cases, 1990 to 2016, % |                                |                                 | Overall change, % |
|-----------------|-------------------------------------|--------------------------------|---------------------------------|-------------------------------------|-----------------------------------|--------------------------------------------|--------------------------------|---------------------------------|-------------------|
|                 |                                     | 2006                           | 2016                            | Given population growth alone       | Given population growth and aging | Due to population growth                   | Due to change in age structure | Due to change in incidence rate |                   |
| Low SDI         | Tracheal, bronchus, and lung cancer | 15268<br>(13904 to 17287)      | 22486<br>(21148 to 24302)       | 20200                               | 20721                             | 32.3                                       | 3.4                            | 11.6                            | 47.3              |
| Global          | Malignant skin melanoma             | 202984<br>(178679 to 226918)   | 281528<br>(243064 to 314164)    | 228213                              | 258780                            | 12.4                                       | 15.1                           | 11.2                            | 38.7              |
| High SDI        | Malignant skin melanoma             | 155350<br>(134742 to 174853)   | 211113<br>(179804 to 235108)    | 163647                              | 179122                            | 5.3                                        | 10                             | 20.6                            | 35.9              |
| High-middle SDI | Malignant skin melanoma             | 31950<br>(28104 to 36834)      | 44383<br>(38783 to 50361)       | 35496                               | 40099                             | 11.1                                       | 14.4                           | 13.4                            | 38.9              |
| Middle SDI      | Malignant skin melanoma             | 11023<br>(9867 to 12291)       | 18691<br>(16328 to 20556)       | 11832                               | 14011                             | 7.3                                        | 19.8                           | 42.4                            | 69.6              |
| Low-middle SDI  | Malignant skin melanoma             | 3704<br>(3237 to 4245)         | 5763<br>(5121 to 6630)          | 4319                                | 4886                              | 16.6                                       | 15.3                           | 23.7                            | 55.6              |
| Low SDI         | Malignant skin melanoma             | 1847<br>(1548 to 2143)         | 2645<br>(2237 to 3015)          | 2443                                | 2508                              | 32.3                                       | 3.5                            | 7.4                             | 43.2              |
| Global          | Non-melanoma skin cancer            | 1353929<br>(998622 to 1788464) | 1521185<br>(1108989 to 2008485) | 1522209                             | 1795065                           | 12.4                                       | 20.2                           | -20.2                           | 12.4              |
| High SDI        | Non-melanoma skin cancer            | 904058<br>(650656 to 1199302)  | 910232<br>(623182 to 1240450)   | 952347                              | 1113532                           | 5.3                                        | 17.8                           | -22.5                           | 0.7               |

| Location        |                                                    | Incidence cases, No.         |                              | Expected incidence cases, 2016, No. |                                   | Change in incidence cases, 1990 to 2016, % |                                |                                 | Overall change, % |
|-----------------|----------------------------------------------------|------------------------------|------------------------------|-------------------------------------|-----------------------------------|--------------------------------------------|--------------------------------|---------------------------------|-------------------|
|                 |                                                    | 2006                         | 2016                         | Given population growth alone       | Given population growth and aging | Due to population growth                   | Due to change in age structure | Due to change in incidence rate |                   |
| High-middle SDI | Non-melanoma skin cancer                           | 165696<br>(130926 to 214683) | 226750<br>(176393 to 289391) | 184091                              | 213777                            | 11.1                                       | 17.9                           | 7.8                             | 36.8              |
| Middle SDI      | Non-melanoma skin cancer                           | 221182<br>(169545 to 290848) | 295218<br>(227972 to 379945) | 237425                              | 301946                            | 7.3                                        | 29.2                           | -3                              | 33.5              |
| Low-middle SDI  | Non-melanoma skin cancer                           | 47504<br>(33300 to 68778)    | 66253<br>(46450 to 95777)    | 55400                               | 63398                             | 16.6                                       | 16.8                           | 6                               | 39.5              |
| Low SDI         | Non-melanoma skin cancer                           | 13588<br>(9119 to 20470)     | 19721<br>(13128 to 30031)    | 17977                               | 18475                             | 32.3                                       | 3.7                            | 9.2                             | 45.1              |
| Global          | Non-melanoma skin cancer (squamous-cell carcinoma) | 606710<br>(381513 to 918728) | 635051<br>(385690 to 922345) | 682117                              | 815484                            | 12.4                                       | 22                             | -29.7                           | 4.7               |
| High SDI        | Non-melanoma skin cancer (squamous-cell carcinoma) | 451221<br>(277363 to 672768) | 456001<br>(256933 to 667176) | 475321                              | 565708                            | 5.3                                        | 20                             | -24.3                           | 1.1               |
| High-middle SDI | Non-melanoma skin cancer (squamous-cell carcinoma) | 48593<br>(32494 to 86907)    | 60117<br>(43765 to 93928)    | 53987                               | 63441                             | 11.1                                       | 19.5                           | -6.8                            | 23.7              |
| Middle SDI      | Non-melanoma skin cancer (squamous-cell carcinoma) | 89383<br>(56899 to 142182)   | 95714<br>(66538 to 138977)   | 95946                               | 125201                            | 7.3                                        | 32.7                           | -33                             | 7.1               |

| Location        |                                                    | Incidence cases, No.          |                               | Expected incidence cases, 2016, No. |                                   | Change in incidence cases, 1990 to 2016, % |                                |                                 | Overall change, % |
|-----------------|----------------------------------------------------|-------------------------------|-------------------------------|-------------------------------------|-----------------------------------|--------------------------------------------|--------------------------------|---------------------------------|-------------------|
|                 |                                                    | 2006                          | 2016                          | Given population growth alone       | Given population growth and aging | Due to population growth                   | Due to change in age structure | Due to change in incidence rate |                   |
| Low-middle SDI  | Non-melanoma skin cancer (squamous-cell carcinoma) | 12678<br>(9286 to 20211)      | 16961<br>(13333 to 22661)     | 14785                               | 17240                             | 16.6                                       | 19.4                           | -2.2                            | 33.8              |
| Low SDI         | Non-melanoma skin cancer (squamous-cell carcinoma) | 3193<br>(2614 to 4029)        | 4516<br>(3577 to 5726)        | 4223                                | 4378                              | 32.3                                       | 4.8                            | 4.3                             | 41.5              |
| Global          | Non-melanoma skin cancer (basal-cell carcinoma)    | 747220<br>(500135 to 1055698) | 886134<br>(574092 to 1261531) | 840091                              | 979580                            | 12.4                                       | 18.7                           | -12.5                           | 18.6              |
| High SDI        | Non-melanoma skin cancer (basal-cell carcinoma)    | 452838<br>(286960 to 671515)  | 454231<br>(273336 to 687116)  | 477025                              | 547824                            | 5.3                                        | 15.6                           | -20.7                           | 0.3               |
| High-middle SDI | Non-melanoma skin cancer (basal-cell carcinoma)    | 117103<br>(91369 to 148773)   | 166633<br>(120372 to 222374)  | 130103                              | 150336                            | 11.1                                       | 17.3                           | 13.9                            | 42.3              |
| Middle SDI      | Non-melanoma skin cancer (basal-cell carcinoma)    | 131799<br>(93184 to 176447)   | 199504<br>(139154 to 267877)  | 141478                              | 176745                            | 7.3                                        | 26.8                           | 17.3                            | 51.4              |
| Low-middle SDI  | Non-melanoma skin cancer (basal-cell carcinoma)    | 34826<br>(21496 to 54930)     | 49292<br>(29545 to 78033)     | 40615                               | 46157                             | 16.6                                       | 15.9                           | 9                               | 41.5              |
| Low SDI         | Non-melanoma skin cancer (basal-cell carcinoma)    | 10396<br>(6078 to 17253)      | 15204<br>(8916 to 25134)      | 13753                               | 14096                             | 32.3                                       | 3.3                            | 10.7                            | 46.3              |

| Location        |                 | Incidence cases, No.            |                                 | Expected incidence cases, 2016, No. |                                   | Change in incidence cases, 1990 to 2016, % |                                |                                 | Overall change, % |
|-----------------|-----------------|---------------------------------|---------------------------------|-------------------------------------|-----------------------------------|--------------------------------------------|--------------------------------|---------------------------------|-------------------|
|                 |                 | 2006                            | 2016                            | Given population growth alone       | Given population growth and aging | Due to population growth                   | Due to change in age structure | Due to change in incidence rate |                   |
| Global          | Breast cancer   | 1319274<br>(1285179 to 1352139) | 1702217<br>(1628609 to 1801186) | 1483246                             | 1690669                           | 12.4                                       | 15.7                           | 0.9                             | 29                |
| High SDI        | Breast cancer   | 634531<br>(623997 to 644279)    | 726622<br>(707997 to 760448)    | 668423                              | 745249                            | 5.3                                        | 12.1                           | -2.9                            | 14.5              |
| High-middle SDI | Breast cancer   | 261237<br>(251472 to 269066)    | 332276<br>(305903 to 360083)    | 290238                              | 332291                            | 11.1                                       | 16.1                           | 0                               | 27.2              |
| Middle SDI      | Breast cancer   | 271736<br>(254436 to 283258)    | 414854<br>(379649 to 448538)    | 291692                              | 349643                            | 7.3                                        | 21.3                           | 24                              | 52.7              |
| Low-middle SDI  | Breast cancer   | 127133<br>(116375 to 146272)    | 190102<br>(173698 to 226022)    | 148265                              | 167725                            | 16.6                                       | 15.3                           | 17.6                            | 49.5              |
| Low SDI         | Breast cancer   | 26373<br>(21876 to 32887)       | 37663<br>(34077 to 42226)       | 34891                               | 35741                             | 32.3                                       | 3.2                            | 7.3                             | 42.8              |
| Global          | Cervical cancer | 469434<br>(388864 to 492090)    | 511169<br>(413969 to 542277)    | 527779                              | 579003                            | 12.4                                       | 10.9                           | -14.5                           | 8.9               |
| High SDI        | Cervical cancer | 63464<br>(61782 to 64936)       | 63061<br>(60702 to 66504)       | 66854                               | 70406                             | 5.3                                        | 5.6                            | -11.6                           | -0.6              |
| High-middle SDI | Cervical cancer | 76774<br>(71182 to 80347)       | 78705<br>(68459 to 85768)       | 85297                               | 94484                             | 11.1                                       | 12                             | -20.6                           | 2.5               |



| Location        |                 | Incidence cases, No.         |                              | Expected incidence cases, 2016, No. |                                   | Change in incidence cases, 1990 to 2016, % |                                |                                 | Overall change, % |
|-----------------|-----------------|------------------------------|------------------------------|-------------------------------------|-----------------------------------|--------------------------------------------|--------------------------------|---------------------------------|-------------------|
|                 |                 | 2006                         | 2016                         | Given population growth alone       | Given population growth and aging | Due to population growth                   | Due to change in age structure | Due to change in incidence rate |                   |
| Middle SDI      | Cervical cancer | 156970<br>(122826 to 164021) | 173512<br>(131220 to 187481) | 168498                              | 195559                            | 7.3                                        | 17.2                           | -14                             | 10.5              |
| Low-middle SDI  | Cervical cancer | 112841<br>(88616 to 125449)  | 124698<br>(99160 to 135478)  | 131598                              | 147605                            | 16.6                                       | 14.2                           | -20.3                           | 10.5              |
| Low SDI         | Cervical cancer | 58431<br>(41321 to 71478)    | 69662<br>(48584 to 82632)    | 77306                               | 79305                             | 32.3                                       | 3.4                            | -16.5                           | 19.2              |
| Global          | Uterine cancer  | 297330<br>(290529 to 303992) | 417353<br>(400753 to 441738) | 334285                              | 386447                            | 12.4                                       | 17.5                           | 10.4                            | 40.4              |
| High SDI        | Uterine cancer  | 135573<br>(132594 to 138281) | 188007<br>(180895 to 198633) | 142813                              | 162096                            | 5.3                                        | 14.2                           | 19.1                            | 38.7              |
| High-middle SDI | Uterine cancer  | 81840<br>(77176 to 86613)    | 116595<br>(107295 to 129213) | 90925                               | 105456                            | 11.1                                       | 17.8                           | 13.6                            | 42.5              |
| Middle SDI      | Uterine cancer  | 57679<br>(55429 to 59583)    | 82586<br>(79035 to 87925)    | 61914                               | 75761                             | 7.3                                        | 24                             | 11.8                            | 43.2              |
| Low-middle SDI  | Uterine cancer  | 18625<br>(16938 to 19870)    | 25635<br>(24112 to 26973)    | 21720                               | 25015                             | 16.6                                       | 17.7                           | 3.3                             | 37.6              |
| Low SDI         | Uterine cancer  | 4753<br>(4296 to 5165)       | 6162<br>(5701 to 6599)       | 6288                                | 6432                              | 32.3                                       | 3                              | -5.7                            | 29.6              |

| Location        |                 | Incidence cases, No.           |                                 | Expected incidence cases, 2016, No. |                                   | Change in incidence cases, 1990 to 2016, % |                                |                                 | Overall change, % |
|-----------------|-----------------|--------------------------------|---------------------------------|-------------------------------------|-----------------------------------|--------------------------------------------|--------------------------------|---------------------------------|-------------------|
|                 |                 | 2006                           | 2016                            | Given population growth alone       | Given population growth and aging | Due to population growth                   | Due to change in age structure | Due to change in incidence rate |                   |
| Global          | Ovarian cancer  | 204292<br>(199800 to 208804)   | 253547<br>(242388 to 260154)    | 229683                              | 260083                            | 12.4                                       | 14.9                           | -3.2                            | 24.1              |
| High SDI        | Ovarian cancer  | 78458<br>(76932 to 80010)      | 85509<br>(80303 to 89115)       | 82648                               | 92895                             | 5.3                                        | 13.1                           | -9.4                            | 9                 |
| High-middle SDI | Ovarian cancer  | 44965<br>(43481 to 46476)      | 52717<br>(48738 to 55292)       | 49957                               | 56503                             | 11.1                                       | 14.6                           | -8.4                            | 17.2              |
| Middle SDI      | Ovarian cancer  | 46339<br>(44967 to 48441)      | 64087<br>(61799 to 66011)       | 49742                               | 59022                             | 7.3                                        | 20                             | 10.9                            | 38.3              |
| Low-middle SDI  | Ovarian cancer  | 27996<br>(26748 to 29820)      | 41059<br>(39181 to 42815)       | 32649                               | 36748                             | 16.6                                       | 14.6                           | 15.4                            | 46.7              |
| Low SDI         | Ovarian cancer  | 7037<br>(5714 to 7451)         | 10636<br>(8689 to 11362)        | 9310                                | 9522                              | 32.3                                       | 3                              | 15.8                            | 51.1              |
| Global          | Prostate cancer | 1024737<br>(941906 to 1133813) | 1435742<br>(1293396 to 1618655) | 1152101                             | 1360610                           | 12.4                                       | 20.3                           | 7.3                             | 40.1              |
| High SDI        | Prostate cancer | 686576<br>(627394 to 774210)   | 899318<br>(836795 to 1065763)   | 723248                              | 851446                            | 5.3                                        | 18.7                           | 7                               | 31                |
| High-middle SDI | Prostate cancer | 152657<br>(143626 to 178410)   | 226521<br>(205520 to 255438)    | 169605                              | 196941                            | 11.1                                       | 17.9                           | 19.4                            | 48.4              |

| Location        |                   | Incidence cases, No.         |                              | Expected incidence cases, 2016, No. |                                   | Change in incidence cases, 1990 to 2016, % |                                |                                 | Overall change, % |
|-----------------|-------------------|------------------------------|------------------------------|-------------------------------------|-----------------------------------|--------------------------------------------|--------------------------------|---------------------------------|-------------------|
|                 |                   | 2006                         | 2016                         | Given population growth alone       | Given population growth and aging | Due to population growth                   | Due to change in age structure | Due to change in incidence rate |                   |
| Middle SDI      | Prostate cancer   | 119754<br>(101660 to 134274) | 207679<br>(178146 to 237617) | 128549                              | 167105                            | 7.3                                        | 32.2                           | 33.9                            | 73.4              |
| Low-middle SDI  | Prostate cancer   | 47737<br>(32584 to 55265)    | 74721<br>(51286 to 82781)    | 55671                               | 65261                             | 16.6                                       | 20.1                           | 19.8                            | 56.5              |
| Low SDI         | Prostate cancer   | 20214<br>(11526 to 23402)    | 29805<br>(16591 to 34971)    | 26743                               | 27715                             | 32.3                                       | 4.8                            | 10.3                            | 47.4              |
| Global          | Testicular cancer | 51202<br>(50063 to 52400)    | 66833<br>(64487 to 69736)    | 57565                               | 58744                             | 12.4                                       | 2.3                            | 15.8                            | 30.5              |
| High SDI        | Testicular cancer | 29422<br>(28417 to 30391)    | 34681<br>(32921 to 36935)    | 30993                               | 29738                             | 5.3                                        | -4.3                           | 16.8                            | 17.9              |
| High-middle SDI | Testicular cancer | 11199<br>(10758 to 11673)    | 15610<br>(14831 to 16376)    | 12441                               | 12739                             | 11.1                                       | 2.7                            | 25.6                            | 39.4              |
| Middle SDI      | Testicular cancer | 6982<br>(6768 to 7280)       | 11740<br>(11334 to 12177)    | 7494                                | 7715                              | 7.3                                        | 3.2                            | 57.6                            | 68.1              |
| Low-middle SDI  | Testicular cancer | 3269<br>(3101 to 3471)       | 4198<br>(3965 to 4480)       | 3812                                | 4035                              | 16.6                                       | 6.8                            | 5                               | 28.4              |
| Low SDI         | Testicular cancer | 538<br>(479 to 613)          | 651<br>(590 to 734)          | 711                                 | 730                               | 32.3                                       | 3.5                            | -14.8                           | 21                |

| Location        |                | Incidence cases, No.         |                              | Expected incidence cases, 2016, No. |                                   | Change in incidence cases, 1990 to 2016, % |                                |                                 | Overall change, % |
|-----------------|----------------|------------------------------|------------------------------|-------------------------------------|-----------------------------------|--------------------------------------------|--------------------------------|---------------------------------|-------------------|
|                 |                | 2006                         | 2016                         | Given population growth alone       | Given population growth and aging | Due to population growth                   | Due to change in age structure | Due to change in incidence rate |                   |
| Global          | Kidney cancer  | 267959<br>(263949 to 271723) | 342100<br>(330759 to 349934) | 301263                              | 343137                            | 12.4                                       | 15.6                           | -0.4                            | 27.7              |
| High SDI        | Kidney cancer  | 134191<br>(131951 to 136091) | 160805<br>(154689 to 165708) | 141358                              | 160165                            | 5.3                                        | 14                             | 0.5                             | 19.8              |
| High-middle SDI | Kidney cancer  | 65561<br>(63121 to 68051)    | 81637<br>(77842 to 85447)    | 72839                               | 82789                             | 11.1                                       | 15.2                           | -1.8                            | 24.5              |
| Middle SDI      | Kidney cancer  | 46725<br>(45882 to 47618)    | 67625<br>(65243 to 69419)    | 50156                               | 59409                             | 7.3                                        | 19.8                           | 17.6                            | 44.7              |
| Low-middle SDI  | Kidney cancer  | 17563<br>(16826 to 18529)    | 25876<br>(24799 to 26806)    | 20482                               | 22559                             | 16.6                                       | 11.8                           | 18.9                            | 47.3              |
| Low SDI         | Kidney cancer  | 5162<br>(4837 to 5561)       | 7308<br>(6413 to 8127)       | 6829                                | 6865                              | 32.3                                       | 0.7                            | 8.6                             | 41.6              |
| Global          | Bladder cancer | 333876<br>(329918 to 337714) | 437442<br>(426709 to 447912) | 375373                              | 441586                            | 12.4                                       | 19.8                           | -1.2                            | 31                |
| High SDI        | Bladder cancer | 171627<br>(169324 to 173991) | 213500<br>(206159 to 220038) | 180794                              | 213267                            | 5.3                                        | 18.9                           | 0.1                             | 24.4              |
| High-middle SDI | Bladder cancer | 76815<br>(75044 to 78668)    | 96865<br>(93605 to 100135)   | 85342                               | 99392                             | 11.1                                       | 18.3                           | -3.3                            | 26.1              |

| Location        |                                 | Incidence cases, No.         |                              | Expected incidence cases, 2016, No. |                                   | Change in incidence cases, 1990 to 2016, % |                                |                                 | Overall change, % |
|-----------------|---------------------------------|------------------------------|------------------------------|-------------------------------------|-----------------------------------|--------------------------------------------|--------------------------------|---------------------------------|-------------------|
|                 |                                 | 2006                         | 2016                         | Given population growth alone       | Given population growth and aging | Due to population growth                   | Due to change in age structure | Due to change in incidence rate |                   |
| Middle SDI      | Bladder cancer                  | 56859<br>(55417 to 58408)    | 85371<br>(80381 to 87836)    | 61034                               | 77034                             | 7.3                                        | 28.1                           | 14.7                            | 50.1              |
| Low-middle SDI  | Bladder cancer                  | 23940<br>(22710 to 25170)    | 34771<br>(32913 to 36384)    | 27918                               | 32388                             | 16.6                                       | 18.7                           | 10                              | 45.2              |
| Low SDI         | Bladder cancer                  | 6011<br>(5650 to 6672)       | 8223<br>(7850 to 8585)       | 7952                                | 8197                              | 32.3                                       | 4.1                            | 0.4                             | 36.8              |
| Global          | Brain and nervous system cancer | 240728<br>(218267 to 250141) | 329673<br>(298926 to 348845) | 270648                              | 294405                            | 12.4                                       | 9.9                            | 14.7                            | 36.9              |
| High SDI        | Brain and nervous system cancer | 73372<br>(64706 to 77067)    | 92681<br>(74397 to 99558)    | 77290                               | 83669                             | 5.3                                        | 8.7                            | 12.3                            | 26.3              |
| High-middle SDI | Brain and nervous system cancer | 53766<br>(49382 to 56471)    | 79703<br>(72810 to 85313)    | 59734                               | 65196                             | 11.1                                       | 10.2                           | 27                              | 48.2              |
| Middle SDI      | Brain and nervous system cancer | 74017<br>(63396 to 77735)    | 105724<br>(92431 to 114403)  | 79452                               | 89642                             | 7.3                                        | 13.8                           | 21.7                            | 42.8              |
| Low-middle SDI  | Brain and nervous system cancer | 32304<br>(28325 to 35122)    | 41107<br>(37077 to 46399)    | 37673                               | 40273                             | 16.6                                       | 8                              | 2.6                             | 27.2              |
| Low SDI         | Brain and nervous system cancer | 7154<br>(6123 to 8020)       | 9749<br>(8616 to 10810)      | 9465                                | 9552                              | 32.3                                       | 1.2                            | 2.7                             | 36.3              |

| Location        |                | Incidence cases, No.         |                              | Expected incidence cases, 2016, No. |                                   | Change in incidence cases, 1990 to 2016, % |                                |                                 | Overall change, % |
|-----------------|----------------|------------------------------|------------------------------|-------------------------------------|-----------------------------------|--------------------------------------------|--------------------------------|---------------------------------|-------------------|
|                 |                | 2006                         | 2016                         | Given population growth alone       | Given population growth and aging | Due to population growth                   | Due to change in age structure | Due to change in incidence rate |                   |
| Global          | Thyroid cancer | 159182<br>(155761 to 162055) | 238232<br>(229319 to 252919) | 178967                              | 198574                            | 12.4                                       | 12.3                           | 24.9                            | 49.7              |
| High SDI        | Thyroid cancer | 79105<br>(75684 to 80968)    | 100420<br>(95385 to 106771)  | 83330                               | 88717                             | 5.3                                        | 6.8                            | 14.8                            | 26.9              |
| High-middle SDI | Thyroid cancer | 31707<br>(30627 to 32953)    | 51421<br>(48060 to 56019)    | 35226                               | 39101                             | 11.1                                       | 12.2                           | 38.9                            | 62.2              |
| Middle SDI      | Thyroid cancer | 30899<br>(29960 to 32409)    | 58429<br>(55309 to 63050)    | 33168                               | 38341                             | 7.3                                        | 16.7                           | 65                              | 89.1              |
| Low-middle SDI  | Thyroid cancer | 14673<br>(13495 to 15739)    | 23790<br>(22883 to 24752)    | 17111                               | 19077                             | 16.6                                       | 13.4                           | 32.1                            | 62.1              |
| Low SDI         | Thyroid cancer | 3141<br>(2309 to 3508)       | 4096<br>(3041 to 4476)       | 4155                                | 4254                              | 32.3                                       | 3.1                            | -5                              | 30.4              |
| Global          | Mesothelioma   | 27239<br>(26149 to 28554)    | 34760<br>(32505 to 36461)    | 30625                               | 35308                             | 12.4                                       | 17.2                           | -2                              | 27.6              |
| High SDI        | Mesothelioma   | 14661<br>(14322 to 15044)    | 18331<br>(17021 to 19127)    | 15443                               | 17942                             | 5.3                                        | 17                             | 2.6                             | 25                |
| High-middle SDI | Mesothelioma   | 4430<br>(4281 to 4795)       | 5477<br>(5233 to 5712)       | 4921                                | 5625                              | 11.1                                       | 15.9                           | -3.4                            | 23.6              |

| Location        |                  | Incidence cases, No.      |                           | Expected incidence cases, 2016, No. |                                   | Change in incidence cases, 1990 to 2016, % |                                |                                 | Overall change, % |
|-----------------|------------------|---------------------------|---------------------------|-------------------------------------|-----------------------------------|--------------------------------------------|--------------------------------|---------------------------------|-------------------|
|                 |                  | 2006                      | 2016                      | Given population growth alone       | Given population growth and aging | Due to population growth                   | Due to change in age structure | Due to change in incidence rate |                   |
| Middle SDI      | Mesothelioma     | 4494<br>(4293 to 4787)    | 6172<br>(5790 to 6477)    | 4823                                | 5849                              | 7.3                                        | 22.8                           | 7.2                             | 37.3              |
| Low-middle SDI  | Mesothelioma     | 3004<br>(2474 to 3759)    | 3954<br>(3472 to 4607)    | 3503                                | 3980                              | 16.6                                       | 15.9                           | -0.9                            | 31.6              |
| Low SDI         | Mesothelioma     | 710<br>(532 to 957)       | 884<br>(692 to 1111)      | 939                                 | 962                               | 32.3                                       | 3.2                            | -11.1                           | 24.5              |
| Global          | Hodgkin lymphoma | 66457<br>(59597 to 73768) | 73323<br>(65969 to 82334) | 74716                               | 78106                             | 12.4                                       | 5.1                            | -7.2                            | 10.3              |
| High SDI        | Hodgkin lymphoma | 27927<br>(26983 to 32248) | 31252<br>(30055 to 36939) | 29418                               | 29537                             | 5.3                                        | 0.4                            | 6.1                             | 11.9              |
| High-middle SDI | Hodgkin lymphoma | 12666<br>(11577 to 13611) | 15026<br>(13159 to 16002) | 14072                               | 14570                             | 11.1                                       | 3.9                            | 3.6                             | 18.6              |
| Middle SDI      | Hodgkin lymphoma | 10696<br>(8591 to 12248)  | 12784<br>(10404 to 14780) | 11482                               | 12696                             | 7.3                                        | 11.4                           | 0.8                             | 19.5              |
| Low-middle SDI  | Hodgkin lymphoma | 11911<br>(9511 to 15176)  | 10845<br>(8943 to 14387)  | 13890                               | 14545                             | 16.6                                       | 5.5                            | -31.1                           | -8.9              |
| Low SDI         | Hodgkin lymphoma | 3610<br>(2506 to 4141)    | 3697<br>(2526 to 4377)    | 4776                                | 4836                              | 32.3                                       | 1.7                            | -31.6                           | 2.4               |

| Location        |                      | Incidence cases, No.         |                              | Expected incidence cases, 2016, No. |                                   | Change in incidence cases, 1990 to 2016, % |                                |                                 | Overall change, % |
|-----------------|----------------------|------------------------------|------------------------------|-------------------------------------|-----------------------------------|--------------------------------------------|--------------------------------|---------------------------------|-------------------|
|                 |                      | 2006                         | 2016                         | Given population growth alone       | Given population growth and aging | Due to population growth                   | Due to change in age structure | Due to change in incidence rate |                   |
| Global          | Non-Hodgkin lymphoma | 319078<br>(304377 to 333823) | 461164<br>(427602 to 482023) | 358736                              | 407003                            | 12.4                                       | 15.1                           | 17                              | 44.5              |
| High SDI        | Non-Hodgkin lymphoma | 174320<br>(165667 to 187535) | 239770<br>(225951 to 264248) | 183631                              | 208999                            | 5.3                                        | 14.6                           | 17.7                            | 37.5              |
| High-middle SDI | Non-Hodgkin lymphoma | 45827<br>(44492 to 49419)    | 75451<br>(70037 to 79706)    | 50914                               | 57261                             | 11.1                                       | 13.8                           | 39.7                            | 64.6              |
| Middle SDI      | Non-Hodgkin lymphoma | 51095<br>(49421 to 54637)    | 82157<br>(73987 to 85368)    | 54847                               | 64608                             | 7.3                                        | 19.1                           | 34.3                            | 60.8              |
| Low-middle SDI  | Non-Hodgkin lymphoma | 33254<br>(28538 to 35457)    | 44491<br>(38207 to 46667)    | 38781                               | 42420                             | 16.6                                       | 10.9                           | 6.2                             | 33.8              |
| Low SDI         | Non-Hodgkin lymphoma | 14979<br>(11132 to 16732)    | 19777<br>(15076 to 22196)    | 19817                               | 19935                             | 32.3                                       | 0.8                            | -1.1                            | 32                |
| Global          | Multiple myeloma     | 100349<br>(88210 to 111447)  | 138509<br>(121000 to 155480) | 112821                              | 131674                            | 12.4                                       | 18.8                           | 6.8                             | 38                |
| High SDI        | Multiple myeloma     | 57019<br>(47672 to 64672)    | 73721<br>(61316 to 86813)    | 60064                               | 69849                             | 5.3                                        | 17.2                           | 6.8                             | 29.3              |
| High-middle SDI | Multiple myeloma     | 17075<br>(15720 to 19458)    | 25301<br>(22033 to 27636)    | 18970                               | 21966                             | 11.1                                       | 17.5                           | 19.5                            | 48.2              |



| Location        |                  | Incidence cases, No.         |                              | Expected incidence cases, 2016, No. |                                   | Change in incidence cases, 1990 to 2016, % |                                |                                 | Overall change, % |
|-----------------|------------------|------------------------------|------------------------------|-------------------------------------|-----------------------------------|--------------------------------------------|--------------------------------|---------------------------------|-------------------|
|                 |                  | 2006                         | 2016                         | Given population growth alone       | Given population growth and aging | Due to population growth                   | Due to change in age structure | Due to change in incidence rate |                   |
| Middle SDI      | Multiple myeloma | 14774<br>(13742 to 16855)    | 23273<br>(21136 to 26947)    | 15858                               | 19848                             | 7.3                                        | 27                             | 23.2                            | 57.5              |
| Low-middle SDI  | Multiple myeloma | 8841<br>(7574 to 9612)       | 12525<br>(11005 to 13977)    | 10310                               | 11848                             | 16.6                                       | 17.4                           | 7.7                             | 41.7              |
| Low SDI         | Multiple myeloma | 2895<br>(2135 to 3337)       | 4052<br>(3129 to 4528)       | 3830                                | 3924                              | 32.3                                       | 3.3                            | 4.4                             | 40                |
| Global          | Leukemia         | 370482<br>(344033 to 385104) | 466802<br>(423070 to 488508) | 416529                              | 454618                            | 12.4                                       | 10.3                           | 3.3                             | 26                |
| High SDI        | Leukemia         | 132201<br>(130035 to 134403) | 173244<br>(166069 to 180076) | 139262                              | 159298                            | 5.3                                        | 15.2                           | 10.5                            | 31                |
| High-middle SDI | Leukemia         | 72840<br>(65301 to 76218)    | 103552<br>(86306 to 112000)  | 80926                               | 87543                             | 11.1                                       | 9.1                            | 22                              | 42.2              |
| Middle SDI      | Leukemia         | 99326<br>(88729 to 104334)   | 117494<br>(102068 to 126403) | 106620                              | 114552                            | 7.3                                        | 8                              | 3                               | 18.3              |
| Low-middle SDI  | Leukemia         | 53456<br>(47824 to 61474)    | 57464<br>(52287 to 64593)    | 62341                               | 65453                             | 16.6                                       | 5.8                            | -14.9                           | 7.5               |
| Low SDI         | Leukemia         | 12619<br>(10697 to 15696)    | 15096<br>(13290 to 17299)    | 16695                               | 16828                             | 32.3                                       | 1.1                            | -13.7                           | 19.6              |

| Location        |                           | Incidence cases, No.      |                             | Expected incidence cases, 2016, No. |                                   | Change in incidence cases, 1990 to 2016, % |                                |                                 | Overall change, % |
|-----------------|---------------------------|---------------------------|-----------------------------|-------------------------------------|-----------------------------------|--------------------------------------------|--------------------------------|---------------------------------|-------------------|
|                 |                           | 2006                      | 2016                        | Given population growth alone       | Given population growth and aging | Due to population growth                   | Due to change in age structure | Due to change in incidence rate |                   |
| Global          | Acute lymphoid leukemia   | 58114<br>(55305 to 65858) | 75996<br>(66466 to 80296)   | 65336                               | 65594                             | 12.4                                       | 0.4                            | 17.9                            | 30.8              |
| High SDI        | Acute lymphoid leukemia   | 14425<br>(13814 to 15077) | 18820<br>(16919 to 19988)   | 15195                               | 15308                             | 5.3                                        | 0.8                            | 24.3                            | 30.5              |
| High-middle SDI | Acute lymphoid leukemia   | 10165<br>(9379 to 11295)  | 16905<br>(13770 to 18701)   | 11293                               | 11240                             | 11.1                                       | -0.5                           | 55.7                            | 66.3              |
| Middle SDI      | Acute lymphoid leukemia   | 18389<br>(17027 to 20694) | 24007<br>(19493 to 25872)   | 19739                               | 19914                             | 7.3                                        | 1                              | 22.3                            | 30.6              |
| Low-middle SDI  | Acute lymphoid leukemia   | 12442<br>(10838 to 15886) | 12873<br>(11684 to 15223)   | 14509                               | 14392                             | 16.6                                       | -0.9                           | -12.2                           | 3.5               |
| Low SDI         | Acute lymphoid leukemia   | 2619<br>(2186 to 3822)    | 3126<br>(2806 to 3935)      | 3464                                | 3443                              | 32.3                                       | -0.8                           | -12.1                           | 19.4              |
| Global          | Chronic lymphoid leukemia | 76290<br>(72538 to 83117) | 105341<br>(98310 to 113339) | 85771                               | 99912                             | 12.4                                       | 18.5                           | 7.1                             | 38.1              |
| High SDI        | Chronic lymphoid leukemia | 43112<br>(40240 to 46605) | 57151<br>(53105 to 62599)   | 45414                               | 53577                             | 5.3                                        | 18.9                           | 8.3                             | 32.6              |
| High-middle SDI | Chronic lymphoid leukemia | 16357<br>(15581 to 17600) | 23399<br>(21163 to 25086)   | 18173                               | 20860                             | 11.1                                       | 16.4                           | 15.5                            | 43                |

| Location        |                           | Incidence cases, No.      |                             | Expected incidence cases, 2016, No. |                                   | Change in incidence cases, 1990 to 2016, % |                                |                                 | Overall change, % |
|-----------------|---------------------------|---------------------------|-----------------------------|-------------------------------------|-----------------------------------|--------------------------------------------|--------------------------------|---------------------------------|-------------------|
|                 |                           | 2006                      | 2016                        | Given population growth alone       | Given population growth and aging | Due to population growth                   | Due to change in age structure | Due to change in incidence rate |                   |
| Middle SDI      | Chronic lymphoid leukemia | 10551<br>(9716 to 12303)  | 16444<br>(14746 to 17988)   | 11326                               | 13297                             | 7.3                                        | 18.7                           | 29.8                            | 55.8              |
| Low-middle SDI  | Chronic lymphoid leukemia | 5633<br>(4689 to 6876)    | 7493<br>(6504 to 9027)      | 6568                                | 7451                              | 16.6                                       | 15.7                           | 0.7                             | 33                |
| Low SDI         | Chronic lymphoid leukemia | 972<br>(803 to 1253)      | 1314<br>(1122 to 1615)      | 1286                                | 1319                              | 32.3                                       | 3.4                            | -0.5                            | 35.2              |
| Global          | Acute myeloid leukemia    | 77255<br>(71056 to 82068) | 102968<br>(91146 to 107607) | 86857                               | 95023                             | 12.4                                       | 10.6                           | 10.3                            | 33.3              |
| High SDI        | Acute myeloid leukemia    | 34500<br>(30802 to 36370) | 46847<br>(40087 to 49064)   | 36342                               | 41189                             | 5.3                                        | 14                             | 16.4                            | 35.8              |
| High-middle SDI | Acute myeloid leukemia    | 14693<br>(12678 to 15678) | 20771<br>(16706 to 22450)   | 16324                               | 17483                             | 11.1                                       | 7.9                            | 22.4                            | 41.4              |
| Middle SDI      | Acute myeloid leukemia    | 14616<br>(13409 to 16937) | 18645<br>(17277 to 21227)   | 15689                               | 16718                             | 7.3                                        | 7                              | 13.2                            | 27.6              |
| Low-middle SDI  | Acute myeloid leukemia    | 11306<br>(9768 to 13557)  | 13829<br>(12170 to 15837)   | 13184                               | 13723                             | 16.6                                       | 4.8                            | 0.9                             | 22.3              |
| Low SDI         | Acute myeloid leukemia    | 2381<br>(2050 to 3163)    | 3222<br>(2762 to 3853)      | 3150                                | 3165                              | 32.3                                       | 0.6                            | 2.4                             | 35.3              |

| Location        |                          | Incidence cases, No.         |                              | Expected incidence cases, 2016, No. |                                   | Change in incidence cases, 1990 to 2016, % |                                |                                 | Overall change, % |
|-----------------|--------------------------|------------------------------|------------------------------|-------------------------------------|-----------------------------------|--------------------------------------------|--------------------------------|---------------------------------|-------------------|
|                 |                          | 2006                         | 2016                         | Given population growth alone       | Given population growth and aging | Due to population growth                   | Due to change in age structure | Due to change in incidence rate |                   |
| Global          | Chronic myeloid leukemia | 30436<br>(27806 to 32275)    | 32363<br>(29258 to 34323)    | 34219                               | 38358                             | 12.4                                       | 13.6                           | -19.7                           | 6.3               |
| High SDI        | Chronic myeloid leukemia | 11587<br>(10833 to 12122)    | 12095<br>(10946 to 12780)    | 12206                               | 13930                             | 5.3                                        | 14.9                           | -15.8                           | 4.4               |
| High-middle SDI | Chronic myeloid leukemia | 5851<br>(5100 to 6133)       | 5942<br>(5088 to 6371)       | 6500                                | 7259                              | 11.1                                       | 13                             | -22.5                           | 1.6               |
| Middle SDI      | Chronic myeloid leukemia | 5449<br>(4982 to 5919)       | 5907<br>(5378 to 6465)       | 5849                                | 6701                              | 7.3                                        | 15.6                           | -14.6                           | 8.4               |
| Low-middle SDI  | Chronic myeloid leukemia | 6237<br>(5132 to 7633)       | 6852<br>(5772 to 8191)       | 7273                                | 8031                              | 16.6                                       | 12.2                           | -18.9                           | 9.9               |
| Low SDI         | Chronic myeloid leukemia | 1489<br>(1233 to 1814)       | 1780<br>(1505 to 2125)       | 1970                                | 2020                              | 32.3                                       | 3.4                            | -16.2                           | 19.5              |
| Global          | Other leukemia           | 128387<br>(108979 to 135155) | 150134<br>(127058 to 161348) | 144344                              | 155730                            | 12.4                                       | 8.9                            | -4.4                            | 16.9              |
| High SDI        | Other leukemia           | 28577<br>(27172 to 30154)    | 38330<br>(35108 to 40548)    | 30103                               | 35292                             | 5.3                                        | 18.2                           | 10.6                            | 34.1              |
| High-middle SDI | Other leukemia           | 25774<br>(20477 to 27855)    | 36536<br>(26921 to 41204)    | 28635                               | 30700                             | 11.1                                       | 8                              | 22.6                            | 41.8              |

| Location        |                 | Incidence cases, No.         |                              | Expected incidence cases, 2016, No. |                                   | Change in incidence cases, 1990 to 2016, % |                                |                                 | Overall change, % |
|-----------------|-----------------|------------------------------|------------------------------|-------------------------------------|-----------------------------------|--------------------------------------------|--------------------------------|---------------------------------|-------------------|
|                 |                 | 2006                         | 2016                         | Given population growth alone       | Given population growth and aging | Due to population growth                   | Due to change in age structure | Due to change in incidence rate |                   |
| Middle SDI      | Other leukemia  | 50321<br>(39849 to 52523)    | 52491<br>(42662 to 58493)    | 54016                               | 57920                             | 7.3                                        | 7.8                            | -10.8                           | 4.3               |
| Low-middle SDI  | Other leukemia  | 17840<br>(14760 to 20335)    | 16417<br>(14407 to 17990)    | 20805                               | 21853                             | 16.6                                       | 5.9                            | -30.5                           | -8                |
| Low SDI         | Other leukemia  | 5158<br>(3864 to 6632)       | 5654<br>(4599 to 6821)       | 6823                                | 6879                              | 32.3                                       | 1.1                            | -23.8                           | 9.6               |
| Global          | Other neoplasms | 495012<br>(468793 to 503028) | 750253<br>(681869 to 772487) | 556537                              | 617221                            | 12.4                                       | 12.3                           | 26.9                            | 51.6              |
| High SDI        | Other neoplasms | 178743<br>(174575 to 182261) | 247574<br>(232971 to 258019) | 188289                              | 211053                            | 5.3                                        | 12.7                           | 20.4                            | 38.5              |
| High-middle SDI | Other neoplasms | 90220<br>(86651 to 93086)    | 151901<br>(140796 to 159276) | 100236                              | 111193                            | 11.1                                       | 12.1                           | 45.1                            | 68.4              |
| Middle SDI      | Other neoplasms | 121568<br>(113816 to 124335) | 207696<br>(188189 to 214137) | 130495                              | 150948                            | 7.3                                        | 16.8                           | 46.7                            | 70.8              |
| Low-middle SDI  | Other neoplasms | 75690<br>(66747 to 79046)    | 105289<br>(85134 to 109563)  | 88271                               | 95805                             | 16.6                                       | 10                             | 12.5                            | 39.1              |
| Low SDI         | Other neoplasms | 28958<br>(24756 to 31115)    | 36918<br>(32102 to 39377)    | 38312                               | 39049                             | 32.3                                       | 2.5                            | -7.4                            | 27.5              |



eTable 15: Contribution of YLDs and YLLs to DALYs by cancer, global, both sexes, 2016

| Cause                                              | Contribution YLLs (%) | Contribution YLDs (%) |
|----------------------------------------------------|-----------------------|-----------------------|
| Neoplasm                                           | 98                    | 2                     |
| Lip and Oral Cavity Cancer                         | 97                    | 3                     |
| Nasopharynx Cancer                                 | 98                    | 2                     |
| Other Pharynx Cancer                               | 98                    | 2                     |
| Esophageal Cancer                                  | 99                    | 1                     |
| Stomach Cancer                                     | 98                    | 2                     |
| Colon and Rectum Cancer                            | 97                    | 3                     |
| Liver Cancer                                       | 99                    | 1                     |
| Gallbladder and Biliary Tract Cancer               | 99                    | 1                     |
| Pancreatic Cancer                                  | 99                    | 1                     |
| Larynx Cancer                                      | 97                    | 3                     |
| Tracheal, Bronchus, and Lung Cancer                | 99                    | 1                     |
| Malignant Skin Melanoma                            | 94                    | 6                     |
| Non-Melanoma Skin Cancer                           | 97                    | 3                     |
| Non-Melanoma Skin Cancer (Squamous-Cell Carcinoma) | 97                    | 3                     |
| Non-Melanoma Skin Cancer (Basal-Cell Carcinoma)    | 0                     | 100                   |
| Breast Cancer                                      | 95                    | 5                     |
| Cervical Cancer                                    | 97                    | 3                     |
| Uterine Cancer                                     | 93                    | 7                     |
| Ovarian Cancer                                     | 97                    | 3                     |
| Prostate Cancer                                    | 91                    | 9                     |
| Testicular Cancer                                  | 94                    | 6                     |
| Kidney Cancer                                      | 96                    | 4                     |
| Bladder Cancer                                     | 95                    | 5                     |
| Brain and Nervous System Cancer                    | 99                    | 1                     |
| Thyroid Cancer                                     | 93                    | 7                     |
| Mesothelioma                                       | 98                    | 2                     |

| Cause                     | Contribution YLLs (%) | Contribution YLDs (%) |
|---------------------------|-----------------------|-----------------------|
| Hodgkin Lymphoma          | 97                    | 3                     |
| Non-Hodgkin Lymphoma      | 98                    | 2                     |
| Multiple Myeloma          | 97                    | 3                     |
| Leukemia                  | 98                    | 2                     |
| Acute Lymphoid Leukemia   | 99                    | 1                     |
| Chronic Lymphoid Leukemia | 92                    | 8                     |
| Acute Myeloid Leukemia    | 99                    | 1                     |
| Chronic Myeloid Leukemia  | 98                    | 2                     |
| Other Leukemia            | 98                    | 2                     |
| Other Neoplasms           | 98                    | 2                     |

*eTable 16: Probability of developing cancer within selected age intervals, global, and by SDI quintile, by sex, 2006-2016 in % (odds)*

| Location/<br>SDI<br>quintile | Cancer                        | Birth to age 49        |                        | Age 50 to 59           |                        | Age 60 to 69           |                        | Age 70 to 79           |                        | Age 30 to 70          |                        | Birth to age 79       |                        |
|------------------------------|-------------------------------|------------------------|------------------------|------------------------|------------------------|------------------------|------------------------|------------------------|------------------------|-----------------------|------------------------|-----------------------|------------------------|
|                              |                               | Male                   | Female                 | Male                   | Female                 | Male                   | Female                 | Male                   | Female                 | Male                  | Female                 | Male                  | Female                 |
| <b>Global</b>                | Neoplasms                     | 2.43<br>(1 in<br>41)   | 3.40<br>(1 in<br>29)   | 4.40<br>(1 in<br>23)   | 3.99<br>(1 in<br>25)   | 10.52<br>(1 in<br>10)  | 6.52<br>(1 in<br>15)   | 17.43<br>(1 in<br>6)   | 9.34<br>(1 in<br>11)   | 30.80<br>(1 in<br>3)  | 21.06<br>(1 in<br>5)   | 31.09<br>(1 in<br>3)  | 21.40<br>(1 in<br>5)   |
| <b>Global</b>                | Lip and oral<br>cavity cancer | 0.10<br>(1 in<br>991)  | 0.07<br>(1 in<br>1417) | 0.16<br>(1 in<br>629)  | 0.08<br>(1 in<br>1251) | 0.25<br>(1 in<br>394)  | 0.13<br>(1 in<br>780)  | 0.33<br>(1 in<br>304)  | 0.17<br>(1 in<br>580)  | 0.83<br>(1 in<br>120) | 0.44<br>(1 in<br>227)  | 0.84<br>(1 in<br>119) | 0.45<br>(1 in<br>222)  |
| <b>Global</b>                | Nasopharynx<br>cancer         | 0.06<br>(1 in<br>1584) | 0.02<br>(1 in<br>4302) | 0.04<br>(1 in<br>2456) | 0.01<br>(1 in<br>7131) | 0.05<br>(1 in<br>1853) | 0.02<br>(1 in<br>6522) | 0.05<br>(1 in<br>1906) | 0.02<br>(1 in<br>6654) | 0.20<br>(1 in<br>501) | 0.06<br>(1 in<br>1567) | 0.21<br>(1 in<br>476) | 0.07<br>(1 in<br>1479) |
| <b>Global</b>                | Other<br>pharynx<br>cancer    | 0.04<br>(1 in<br>2391) | 0.02<br>(1 in<br>5535) | 0.11<br>(1 in<br>936)  | 0.03<br>(1 in<br>3434) | 0.17<br>(1 in<br>606)  | 0.04<br>(1 in<br>2299) | 0.16<br>(1 in<br>645)  | 0.04<br>(1 in<br>2289) | 0.47<br>(1 in<br>215) | 0.13<br>(1 in<br>757)  | 0.47<br>(1 in<br>214) | 0.13<br>(1 in<br>745)  |



| Location/<br>SDI<br>quintile | Cancer                               | Birth to age 49        |                         | Age 50 to 59           |                        | Age 60 to 69           |                        | Age 70 to 79          |                        | Age 30 to 70          |                        | Birth to age 79       |                        |
|------------------------------|--------------------------------------|------------------------|-------------------------|------------------------|------------------------|------------------------|------------------------|-----------------------|------------------------|-----------------------|------------------------|-----------------------|------------------------|
|                              |                                      | Male                   | Female                  | Male                   | Female                 | Male                   | Female                 | Male                  | Female                 | Male                  | Female                 | Male                  | Female                 |
| <b>Global</b>                | Esophageal cancer                    | 0.06<br>(1 in<br>1680) | 0.02<br>(1 in<br>4025)  | 0.18<br>(1 in<br>562)  | 0.05<br>(1 in<br>1899) | 0.44<br>(1 in<br>227)  | 0.13<br>(1 in<br>758)  | 0.64<br>(1 in<br>156) | 0.21<br>(1 in<br>480)  | 1.31<br>(1 in<br>76)  | 0.42<br>(1 in<br>241)  | 1.31<br>(1 in<br>76)  | 0.42<br>(1 in<br>240)  |
| <b>Global</b>                | Stomach cancer                       | 0.15<br>(1 in<br>656)  | 0.11<br>(1 in<br>944)   | 0.37<br>(1 in<br>268)  | 0.16<br>(1 in<br>620)  | 0.97<br>(1 in<br>103)  | 0.35<br>(1 in<br>283)  | 1.63<br>(1 in<br>61)  | 0.63<br>(1 in<br>157)  | 3.09<br>(1 in<br>32)  | 1.24<br>(1 in<br>81)   | 3.10<br>(1 in<br>32)  | 1.25<br>(1 in<br>80)   |
| <b>Global</b>                | Colon and rectum cancer              | 0.20<br>(1 in<br>504)  | 0.16<br>(1 in<br>618)   | 0.44<br>(1 in<br>228)  | 0.33<br>(1 in<br>306)  | 1.13<br>(1 in<br>88)   | 0.69<br>(1 in<br>144)  | 2.09<br>(1 in<br>48)  | 1.29<br>(1 in<br>77)   | 3.80<br>(1 in<br>26)  | 2.45<br>(1 in<br>41)   | 3.81<br>(1 in<br>26)  | 2.46<br>(1 in<br>41)   |
| <b>Global</b>                | Liver cancer                         | 0.31<br>(1 in<br>323)  | 0.08<br>(1 in<br>1272)  | 0.50<br>(1 in<br>202)  | 0.13<br>(1 in<br>756)  | 0.82<br>(1 in<br>122)  | 0.27<br>(1 in<br>370)  | 1.05<br>(1 in<br>95)  | 0.42<br>(1 in<br>236)  | 2.63<br>(1 in<br>38)  | 0.89<br>(1 in<br>112)  | 2.65<br>(1 in<br>38)  | 0.90<br>(1 in<br>111)  |
| <b>Global</b>                | Gallbladder and biliary tract cancer | 0.01<br>(1 in<br>7431) | 0.02<br>(1 in<br>4590)  | 0.03<br>(1 in<br>3257) | 0.04<br>(1 in<br>2348) | 0.08<br>(1 in<br>1208) | 0.10<br>(1 in<br>1020) | 0.17<br>(1 in<br>577) | 0.18<br>(1 in<br>570)  | 0.30<br>(1 in<br>334) | 0.34<br>(1 in<br>297)  | 0.30<br>(1 in<br>333) | 0.34<br>(1 in<br>296)  |
| <b>Global</b>                | Pancreatic cancer                    | 0.04<br>(1 in<br>2561) | 0.02<br>(1 in<br>4154)  | 0.11<br>(1 in<br>945)  | 0.07<br>(1 in<br>1497) | 0.26<br>(1 in<br>380)  | 0.18<br>(1 in<br>550)  | 0.47<br>(1 in<br>212) | 0.37<br>(1 in<br>270)  | 0.88<br>(1 in<br>114) | 0.64<br>(1 in<br>156)  | 0.88<br>(1 in<br>114) | 0.64<br>(1 in<br>156)  |
| <b>Global</b>                | Larynx cancer                        | 0.03<br>(1 in<br>2922) | 0.01<br>(1 in<br>12880) | 0.12<br>(1 in<br>857)  | 0.02<br>(1 in<br>6489) | 0.22<br>(1 in<br>445)  | 0.03<br>(1 in<br>3760) | 0.27<br>(1 in<br>373) | 0.03<br>(1 in<br>2909) | 0.64<br>(1 in<br>156) | 0.08<br>(1 in<br>1199) | 0.64<br>(1 in<br>156) | 0.08<br>(1 in<br>1189) |
| <b>Global</b>                | Tracheal, bronchus, and lung cancer  | 0.19<br>(1 in<br>529)  | 0.11<br>(1 in<br>904)   | 0.66<br>(1 in<br>152)  | 0.28<br>(1 in<br>357)  | 1.80<br>(1 in<br>55)   | 0.67<br>(1 in<br>149)  | 3.09<br>(1 in<br>32)  | 1.14<br>(1 in<br>88)   | 5.63<br>(1 in<br>18)  | 2.18<br>(1 in<br>46)   | 5.64<br>(1 in<br>18)  | 2.18<br>(1 in<br>46)   |

| Location/<br>SDI<br>quintile | Cancer                                             | Birth to age 49      |                     | Age 50 to 59        |                     | Age 60 to 69        |                     | Age 70 to 79        |                    | Age 30 to 70        |                    | Birth to age 79     |                    |
|------------------------------|----------------------------------------------------|----------------------|---------------------|---------------------|---------------------|---------------------|---------------------|---------------------|--------------------|---------------------|--------------------|---------------------|--------------------|
|                              |                                                    | Male                 | Female              | Male                | Female              | Male                | Female              | Male                | Female             | Male                | Female             | Male                | Female             |
| <b>Global</b>                | Malignant skin melanoma                            | 0.07<br>(1 in 1474)  | 0.08<br>(1 in 1252) | 0.08<br>(1 in 1242) | 0.06<br>(1 in 1577) | 0.15<br>(1 in 664)  | 0.10<br>(1 in 1044) | 0.25<br>(1 in 394)  | 0.14<br>(1 in 721) | 0.54<br>(1 in 184)  | 0.36<br>(1 in 275) | 0.55<br>(1 in 181)  | 0.38<br>(1 in 265) |
| <b>Global</b>                | Non-melanoma skin cancer                           | 0.16<br>(1 in 625)   | 0.17<br>(1 in 579)  | 0.34<br>(1 in 297)  | 0.27<br>(1 in 376)  | 0.92<br>(1 in 108)  | 0.56<br>(1 in 177)  | 1.81<br>(1 in 55)   | 1.00<br>(1 in 100) | 3.18<br>(1 in 31)   | 1.97<br>(1 in 51)  | 3.20<br>(1 in 31)   | 1.99<br>(1 in 50)  |
| <b>Global</b>                | Non-melanoma skin cancer (squamous-cell carcinoma) | 0.03<br>(1 in 3572)  | 0.03<br>(1 in 3609) | 0.11<br>(1 in 879)  | 0.06<br>(1 in 1807) | 0.45<br>(1 in 222)  | 0.18<br>(1 in 546)  | 0.98<br>(1 in 102)  | 0.40<br>(1 in 253) | 1.57<br>(1 in 64)   | 0.66<br>(1 in 152) | 1.57<br>(1 in 64)   | 0.66<br>(1 in 151) |
| <b>Global</b>                | Non-melanoma skin cancer (basal-cell carcinoma)    | 0.13<br>(1 in 757)   | 0.14<br>(1 in 690)  | 0.22<br>(1 in 448)  | 0.21<br>(1 in 475)  | 0.47<br>(1 in 211)  | 0.38<br>(1 in 262)  | 0.83<br>(1 in 120)  | 0.61<br>(1 in 164) | 1.64<br>(1 in 61)   | 1.32<br>(1 in 76)  | 1.65<br>(1 in 61)   | 1.34<br>(1 in 75)  |
| <b>Global</b>                | Breast cancer                                      | 0.01<br>(1 in 15229) | 0.99<br>(1 in 101)  | 0.01<br>(1 in 8639) | 1.11<br>(1 in 90)   | 0.03<br>(1 in 3987) | 1.41<br>(1 in 71)   | 0.03<br>(1 in 3108) | 1.53<br>(1 in 66)  | 0.07<br>(1 in 1339) | 4.91<br>(1 in 20)  | 0.08<br>(1 in 1327) | 4.95<br>(1 in 20)  |
| <b>Global</b>                | Cervical cancer                                    | NA                   | 0.49<br>(1 in 203)  | NA                  | 0.33<br>(1 in 306)  | NA                  | 0.31<br>(1 in 322)  | NA                  | 0.25<br>(1 in 406) | NA                  | 1.33<br>(1 in 75)  | NA                  | 1.37<br>(1 in 73)  |
| <b>Global</b>                | Uterine cancer                                     | NA                   | 0.14<br>(1 in 715)  | NA                  | 0.32<br>(1 in 310)  | NA                  | 0.47<br>(1 in 215)  | NA                  | 0.45<br>(1 in 221) | NA                  | 1.37<br>(1 in 73)  | NA                  | 1.37<br>(1 in 73)  |

| Location/<br>SDI<br>quintile | Cancer                          | Birth to age 49      |                      | Age 50 to 59        |                      | Age 60 to 69        |                      | Age 70 to 79        |                     | Age 30 to 70        |                     | Birth to age 79    |                     |
|------------------------------|---------------------------------|----------------------|----------------------|---------------------|----------------------|---------------------|----------------------|---------------------|---------------------|---------------------|---------------------|--------------------|---------------------|
|                              |                                 | Male                 | Female               | Male                | Female               | Male                | Female               | Male                | Female              | Male                | Female              | Male               | Female              |
| <b>Global</b>                | Ovarian cancer                  | NA                   | 0.15<br>(1 in 661)   | NA                  | 0.16<br>(1 in 622)   | NA                  | 0.21<br>(1 in 476)   | NA                  | 0.24<br>(1 in 408)  | NA                  | 0.74<br>(1 in 135)  | NA                 | 0.76<br>(1 in 131)  |
| <b>Global</b>                | Prostate cancer                 | 0.06<br>(1 in 1609)  | NA                   | 0.46<br>(1 in 219)  | NA                   | 1.99<br>(1 in 50)   | NA                   | 3.90<br>(1 in 26)   | NA                  | 6.30<br>(1 in 16)   | NA                  | 6.30<br>(1 in 16)  | NA                  |
| <b>Global</b>                | Testicular cancer               | 0.10<br>(1 in 1010)  | NA                   | 0.01<br>(1 in 7006) | NA                   | 0.01<br>(1 in 8191) | NA                   | 0.01<br>(1 in 7480) | NA                  | 0.10<br>(1 in 1018) | NA                  | 0.14<br>(1 in 720) | NA                  |
| <b>Global</b>                | Kidney cancer                   | 0.07<br>(1 in 1373)  | 0.05<br>(1 in 1963)  | 0.13<br>(1 in 768)  | 0.06<br>(1 in 1590)  | 0.24<br>(1 in 424)  | 0.12<br>(1 in 823)   | 0.36<br>(1 in 276)  | 0.19<br>(1 in 522)  | 0.79<br>(1 in 127)  | 0.41<br>(1 in 241)  | 0.80<br>(1 in 125) | 0.43<br>(1 in 235)  |
| <b>Global</b>                | Bladder cancer                  | 0.05<br>(1 in 1961)  | 0.02<br>(1 in 5319)  | 0.14<br>(1 in 740)  | 0.04<br>(1 in 2679)  | 0.38<br>(1 in 266)  | 0.09<br>(1 in 1169)  | 0.77<br>(1 in 130)  | 0.18<br>(1 in 561)  | 1.32<br>(1 in 76)   | 0.32<br>(1 in 315)  | 1.33<br>(1 in 75)  | 0.32<br>(1 in 313)  |
| <b>Global</b>                | Brain and nervous system cancer | 0.13<br>(1 in 777)   | 0.12<br>(1 in 858)   | 0.09<br>(1 in 1174) | 0.07<br>(1 in 1428)  | 0.14<br>(1 in 706)  | 0.11<br>(1 in 924)   | 0.18<br>(1 in 555)  | 0.14<br>(1 in 716)  | 0.49<br>(1 in 204)  | 0.39<br>(1 in 255)  | 0.53<br>(1 in 187) | 0.43<br>(1 in 231)  |
| <b>Global</b>                | Thyroid cancer                  | 0.05<br>(1 in 1833)  | 0.14<br>(1 in 738)   | 0.06<br>(1 in 1752) | 0.10<br>(1 in 992)   | 0.06<br>(1 in 1694) | 0.12<br>(1 in 860)   | 0.07<br>(1 in 1427) | 0.11<br>(1 in 923)  | 0.23<br>(1 in 430)  | 0.44<br>(1 in 226)  | 0.24<br>(1 in 416) | 0.46<br>(1 in 217)  |
| <b>Global</b>                | Mesothelioma                    | 0.01<br>(1 in 18522) | 0.00<br>(1 in 25827) | 0.01<br>(1 in 8363) | 0.00<br>(1 in 21314) | 0.03<br>(1 in 3877) | 0.01<br>(1 in 10536) | 0.06<br>(1 in 1740) | 0.02<br>(1 in 6006) | 0.10<br>(1 in 1000) | 0.03<br>(1 in 2938) | 0.10<br>(1 in 994) | 0.03<br>(1 in 2882) |

| Location/<br>SDI<br>quintile | Cancer                    | Birth to age 49     |                      | Age 50 to 59         |                      | Age 60 to 69        |                      | Age 70 to 79        |                     | Age 30 to 70        |                     | Birth to age 79     |                     |
|------------------------------|---------------------------|---------------------|----------------------|----------------------|----------------------|---------------------|----------------------|---------------------|---------------------|---------------------|---------------------|---------------------|---------------------|
|                              |                           | Male                | Female               | Male                 | Female               | Male                | Female               | Male                | Female              | Male                | Female              | Male                | Female              |
| <b>Global</b>                | Hodgkin lymphoma          | 0.05<br>(1 in 2107) | 0.03<br>(1 in 3000)  | 0.02<br>(1 in 5211)  | 0.01<br>(1 in 11537) | 0.03<br>(1 in 3979) | 0.01<br>(1 in 8661)  | 0.03<br>(1 in 3848) | 0.01<br>(1 in 7387) | 0.10<br>(1 in 1031) | 0.05<br>(1 in 1957) | 0.12<br>(1 in 849)  | 0.07<br>(1 in 1491) |
| <b>Global</b>                | Non-Hodgkin lymphoma      | 0.12<br>(1 in 833)  | 0.08<br>(1 in 1249)  | 0.13<br>(1 in 752)   | 0.09<br>(1 in 1147)  | 0.25<br>(1 in 404)  | 0.17<br>(1 in 579)   | 0.42<br>(1 in 241)  | 0.28<br>(1 in 352)  | 0.88<br>(1 in 114)  | 0.60<br>(1 in 166)  | 0.91<br>(1 in 110)  | 0.62<br>(1 in 161)  |
| <b>Global</b>                | Multiple myeloma          | 0.02<br>(1 in 6032) | 0.01<br>(1 in 8471)  | 0.04<br>(1 in 2595)  | 0.03<br>(1 in 3424)  | 0.09<br>(1 in 1175) | 0.07<br>(1 in 1503)  | 0.16<br>(1 in 619)  | 0.11<br>(1 in 876)  | 0.30<br>(1 in 333)  | 0.22<br>(1 in 454)  | 0.30<br>(1 in 332)  | 0.22<br>(1 in 451)  |
| <b>Global</b>                | Leukemia                  | 0.14<br>(1 in 715)  | 0.10<br>(1 in 965)   | 0.10<br>(1 in 967)   | 0.07<br>(1 in 1442)  | 0.22<br>(1 in 458)  | 0.13<br>(1 in 793)   | 0.39<br>(1 in 260)  | 0.22<br>(1 in 462)  | 0.78<br>(1 in 128)  | 0.47<br>(1 in 215)  | 0.84<br>(1 in 118)  | 0.51<br>(1 in 194)  |
| <b>Global</b>                | Acute lymphoid leukemia   | 0.04<br>(1 in 2737) | 0.02<br>(1 in 4118)  | 0.01<br>(1 in 8345)  | 0.01<br>(1 in 12545) | 0.02<br>(1 in 5365) | 0.01<br>(1 in 9229)  | 0.02<br>(1 in 4311) | 0.01<br>(1 in 7435) | 0.07<br>(1 in 1514) | 0.04<br>(1 in 2503) | 0.09<br>(1 in 1107) | 0.06<br>(1 in 1769) |
| <b>Global</b>                | Chronic lymphoid leukemia | 0.01<br>(1 in 7641) | 0.01<br>(1 in 7918)  | 0.03<br>(1 in 3493)  | 0.02<br>(1 in 5467)  | 0.07<br>(1 in 1417) | 0.04<br>(1 in 2497)  | 0.13<br>(1 in 779)  | 0.07<br>(1 in 1385) | 0.24<br>(1 in 421)  | 0.14<br>(1 in 711)  | 0.24<br>(1 in 416)  | 0.14<br>(1 in 699)  |
| <b>Global</b>                | Acute myeloid leukemia    | 0.03<br>(1 in 3171) | 0.02<br>(1 in 4096)  | 0.02<br>(1 in 4480)  | 0.02<br>(1 in 6387)  | 0.05<br>(1 in 2189) | 0.03<br>(1 in 3495)  | 0.08<br>(1 in 1177) | 0.05<br>(1 in 1863) | 0.17<br>(1 in 586)  | 0.11<br>(1 in 896)  | 0.18<br>(1 in 542)  | 0.12<br>(1 in 818)  |
| <b>Global</b>                | Chronic myeloid leukemia  | 0.01<br>(1 in 8306) | 0.01<br>(1 in 11844) | 0.01<br>(1 in 10981) | 0.01<br>(1 in 15080) | 0.01<br>(1 in 7652) | 0.01<br>(1 in 11693) | 0.03<br>(1 in 3948) | 0.01<br>(1 in 7198) | 0.06<br>(1 in 1765) | 0.04<br>(1 in 2826) | 0.06<br>(1 in 1680) | 0.04<br>(1 in 2666) |
| <b>Global</b>                | Other leukemia            | 0.05<br>(1 in 2139) | 0.03<br>(1 in 2948)  | 0.03<br>(1 in 3186)  | 0.02<br>(1 in 4807)  | 0.07<br>(1 in 1420) | 0.04<br>(1 in 2629)  | 0.12<br>(1 in 808)  | 0.06<br>(1 in 1578) | 0.25<br>(1 in 400)  | 0.14<br>(1 in 717)  | 0.27<br>(1 in 367)  | 0.16<br>(1 in 641)  |

| Location/<br>SDI<br>quintile | Cancer                     | Birth to age 49     |                      | Age 50 to 59        |                     | Age 60 to 69        |                     | Age 70 to 79        |                     | Age 30 to 70       |                     | Birth to age 79    |                     |
|------------------------------|----------------------------|---------------------|----------------------|---------------------|---------------------|---------------------|---------------------|---------------------|---------------------|--------------------|---------------------|--------------------|---------------------|
|                              |                            | Male                | Female               | Male                | Female              | Male                | Female              | Male                | Female              | Male               | Female              | Male               | Female              |
| <b>Global</b>                | Other neoplasms            | 0.23<br>(1 in 440)  | 0.21<br>(1 in 467)   | 0.17<br>(1 in 574)  | 0.14<br>(1 in 703)  | 0.33<br>(1 in 307)  | 0.23<br>(1 in 433)  | 0.57<br>(1 in 175)  | 0.39<br>(1 in 259)  | 1.22<br>(1 in 82)  | 0.90<br>(1 in 111)  | 1.29<br>(1 in 77)  | 0.97<br>(1 in 103)  |
| <b>High-middle SDI</b>       | Neoplasms                  | 2.84<br>(1 in 35)   | 3.86<br>(1 in 26)    | 5.00<br>(1 in 20)   | 4.32<br>(1 in 23)   | 11.47<br>(1 in 9)   | 6.82<br>(1 in 15)   | 17.67<br>(1 in 6)   | 8.99<br>(1 in 11)   | 32.36<br>(1 in 3)  | 21.55<br>(1 in 5)   | 32.72<br>(1 in 3)  | 21.99<br>(1 in 5)   |
| <b>High-middle SDI</b>       | Lip and oral cavity cancer | 0.06<br>(1 in 1663) | 0.03<br>(1 in 2875)  | 0.14<br>(1 in 723)  | 0.04<br>(1 in 2283) | 0.22<br>(1 in 446)  | 0.07<br>(1 in 1362) | 0.26<br>(1 in 391)  | 0.11<br>(1 in 873)  | 0.67<br>(1 in 149) | 0.26<br>(1 in 382)  | 0.68<br>(1 in 148) | 0.27<br>(1 in 376)  |
| <b>High-middle SDI</b>       | Nasopharynx cancer         | 0.10<br>(1 in 1014) | 0.03<br>(1 in 3268)  | 0.06<br>(1 in 1748) | 0.02<br>(1 in 6004) | 0.07<br>(1 in 1360) | 0.02<br>(1 in 5310) | 0.07<br>(1 in 1485) | 0.02<br>(1 in 5773) | 0.28<br>(1 in 356) | 0.08<br>(1 in 1274) | 0.30<br>(1 in 337) | 0.08<br>(1 in 1199) |
| <b>High-middle SDI</b>       | Other pharynx cancer       | 0.03<br>(1 in 3209) | 0.01<br>(1 in 14579) | 0.11<br>(1 in 924)  | 0.01<br>(1 in 8194) | 0.16<br>(1 in 626)  | 0.02<br>(1 in 5699) | 0.11<br>(1 in 945)  | 0.02<br>(1 in 6207) | 0.40<br>(1 in 248) | 0.05<br>(1 in 1925) | 0.40<br>(1 in 247) | 0.05<br>(1 in 1897) |
| <b>High-middle SDI</b>       | Esophageal cancer          | 0.05<br>(1 in 1932) | 0.02<br>(1 in 5688)  | 0.19<br>(1 in 532)  | 0.04<br>(1 in 2421) | 0.47<br>(1 in 213)  | 0.12<br>(1 in 821)  | 0.67<br>(1 in 148)  | 0.20<br>(1 in 494)  | 1.38<br>(1 in 73)  | 0.38<br>(1 in 262)  | 1.38<br>(1 in 73)  | 0.38<br>(1 in 261)  |
| <b>High-middle SDI</b>       | Stomach cancer             | 0.16<br>(1 in 617)  | 0.11<br>(1 in 885)   | 0.43<br>(1 in 231)  | 0.18<br>(1 in 541)  | 1.19<br>(1 in 84)   | 0.42<br>(1 in 240)  | 1.90<br>(1 in 53)   | 0.74<br>(1 in 136)  | 3.62<br>(1 in 28)  | 1.43<br>(1 in 70)   | 3.63<br>(1 in 28)  | 1.44<br>(1 in 69)   |
| <b>High-middle SDI</b>       | Colon and rectum cancer    | 0.24<br>(1 in 422)  | 0.20<br>(1 in 497)   | 0.54<br>(1 in 184)  | 0.41<br>(1 in 241)  | 1.45<br>(1 in 69)   | 0.87<br>(1 in 115)  | 2.57<br>(1 in 39)   | 1.49<br>(1 in 67)   | 4.71<br>(1 in 21)  | 2.94<br>(1 in 34)   | 4.73<br>(1 in 21)  | 2.95<br>(1 in 34)   |
| <b>High-middle SDI</b>       | Liver cancer               | 0.37<br>(1 in 267)  | 0.08<br>(1 in 1293)  | 0.54<br>(1 in 186)  | 0.13<br>(1 in 796)  | 0.84<br>(1 in 118)  | 0.25<br>(1 in 398)  | 1.05<br>(1 in 95)   | 0.37<br>(1 in 269)  | 2.76<br>(1 in 36)  | 0.82<br>(1 in 123)  | 2.78<br>(1 in 36)  | 0.82<br>(1 in 121)  |

| Location/<br>SDI<br>quintile | Cancer                                             | Birth to age 49     |                      | Age 50 to 59        |                     | Age 60 to 69        |                     | Age 70 to 79       |                     | Age 30 to 70       |                     | Birth to age 79    |                     |
|------------------------------|----------------------------------------------------|---------------------|----------------------|---------------------|---------------------|---------------------|---------------------|--------------------|---------------------|--------------------|---------------------|--------------------|---------------------|
|                              |                                                    | Male                | Female               | Male                | Female              | Male                | Female              | Male               | Female              | Male               | Female              | Male               | Female              |
| <b>High-middle SDI</b>       | Gallbladder and biliary tract cancer               | 0.01<br>(1 in 8122) | 0.02<br>(1 in 5625)  | 0.03<br>(1 in 3363) | 0.04<br>(1 in 2490) | 0.08<br>(1 in 1227) | 0.10<br>(1 in 960)  | 0.16<br>(1 in 634) | 0.18<br>(1 in 543)  | 0.28<br>(1 in 357) | 0.34<br>(1 in 290)  | 0.28<br>(1 in 356) | 0.35<br>(1 in 289)  |
| <b>High-middle SDI</b>       | Pancreatic cancer                                  | 0.06<br>(1 in 1816) | 0.03<br>(1 in 3422)  | 0.15<br>(1 in 672)  | 0.08<br>(1 in 1236) | 0.34<br>(1 in 296)  | 0.21<br>(1 in 472)  | 0.51<br>(1 in 195) | 0.38<br>(1 in 264)  | 1.05<br>(1 in 95)  | 0.70<br>(1 in 143)  | 1.05<br>(1 in 95)  | 0.70<br>(1 in 143)  |
| <b>High-middle SDI</b>       | Larynx cancer                                      | 0.04<br>(1 in 2349) | 0.01<br>(1 in 13840) | 0.17<br>(1 in 599)  | 0.01<br>(1 in 6941) | 0.31<br>(1 in 326)  | 0.02<br>(1 in 4187) | 0.33<br>(1 in 305) | 0.03<br>(1 in 3631) | 0.84<br>(1 in 119) | 0.07<br>(1 in 1385) | 0.84<br>(1 in 119) | 0.07<br>(1 in 1369) |
| <b>High-middle SDI</b>       | Tracheal, bronchus, and lung cancer                | 0.23<br>(1 in 430)  | 0.12<br>(1 in 835)   | 0.89<br>(1 in 112)  | 0.27<br>(1 in 368)  | 2.31<br>(1 in 43)   | 0.58<br>(1 in 173)  | 3.44<br>(1 in 29)  | 0.85<br>(1 in 118)  | 6.72<br>(1 in 15)  | 1.80<br>(1 in 56)   | 6.73<br>(1 in 15)  | 1.81<br>(1 in 55)   |
| <b>High-middle SDI</b>       | Malignant skin melanoma                            | 0.07<br>(1 in 1533) | 0.08<br>(1 in 1252)  | 0.07<br>(1 in 1499) | 0.06<br>(1 in 1632) | 0.11<br>(1 in 917)  | 0.10<br>(1 in 1044) | 0.16<br>(1 in 638) | 0.13<br>(1 in 772)  | 0.39<br>(1 in 258) | 0.35<br>(1 in 284)  | 0.40<br>(1 in 252) | 0.37<br>(1 in 273)  |
| <b>High-middle SDI</b>       | Non-melanoma skin cancer (squamous-cell carcinoma) | 0.02<br>(1 in 4062) | 0.02<br>(1 in 4316)  | 0.07<br>(1 in 1416) | 0.03<br>(1 in 3242) | 0.24<br>(1 in 408)  | 0.07<br>(1 in 1393) | 0.52<br>(1 in 193) | 0.15<br>(1 in 677)  | 0.85<br>(1 in 117) | 0.27<br>(1 in 368)  | 0.86<br>(1 in 117) | 0.27<br>(1 in 366)  |
| <b>High-middle SDI</b>       | Non-melanoma skin cancer (basal-cell carcinoma)    | 0.11<br>(1 in 882)  | 0.13<br>(1 in 755)   | 0.21<br>(1 in 467)  | 0.21<br>(1 in 475)  | 0.50<br>(1 in 202)  | 0.43<br>(1 in 235)  | 0.89<br>(1 in 112) | 0.72<br>(1 in 138)  | 1.69<br>(1 in 59)  | 1.47<br>(1 in 68)   | 1.70<br>(1 in 59)  | 1.48<br>(1 in 67)   |

| Location/<br>SDI<br>quintile | Cancer                   | Birth to age 49      |                     | Age 50 to 59        |                     | Age 60 to 69        |                     | Age 70 to 79        |                    | Age 30 to 70        |                    | Birth to age 79     |                    |
|------------------------------|--------------------------|----------------------|---------------------|---------------------|---------------------|---------------------|---------------------|---------------------|--------------------|---------------------|--------------------|---------------------|--------------------|
|                              |                          | Male                 | Female              | Male                | Female              | Male                | Female              | Male                | Female             | Male                | Female             | Male                | Female             |
| High-middle SDI              | Breast cancer            | 0.01<br>(1 in 16887) | 1.13<br>(1 in 88)   | 0.01<br>(1 in 9983) | 1.17<br>(1 in 85)   | 0.02<br>(1 in 4511) | 1.42<br>(1 in 71)   | 0.03<br>(1 in 3480) | 1.39<br>(1 in 72)  | 0.07<br>(1 in 1513) | 4.97<br>(1 in 20)  | 0.07<br>(1 in 1496) | 5.02<br>(1 in 20)  |
| High-middle SDI              | Cervical cancer          | NA                   | 0.43<br>(1 in 235)  | NA                  | 0.25<br>(1 in 395)  | NA                  | 0.24<br>(1 in 415)  | NA                  | 0.21<br>(1 in 486) | NA                  | 1.09<br>(1 in 92)  | NA                  | 1.12<br>(1 in 89)  |
| High-middle SDI              | Uterine cancer           | NA                   | 0.23<br>(1 in 429)  | NA                  | 0.50<br>(1 in 198)  | NA                  | 0.67<br>(1 in 149)  | NA                  | 0.55<br>(1 in 180) | NA                  | 1.94<br>(1 in 52)  | NA                  | 1.95<br>(1 in 51)  |
| High-middle SDI              | Ovarian cancer           | NA                   | 0.18<br>(1 in 564)  | NA                  | 0.19<br>(1 in 539)  | NA                  | 0.24<br>(1 in 418)  | NA                  | 0.25<br>(1 in 407) | NA                  | 0.82<br>(1 in 122) | NA                  | 0.84<br>(1 in 118) |
| High-middle SDI              | Prostate cancer          | 0.07<br>(1 in 1492)  | NA                  | 0.39<br>(1 in 255)  | NA                  | 1.72<br>(1 in 58)   | NA                  | 3.45<br>(1 in 29)   | NA                 | 5.54<br>(1 in 18)   | NA                 | 5.55<br>(1 in 18)   | NA                 |
| High-middle SDI              | Testicular cancer        | 0.13<br>(1 in 748)   | NA                  | 0.02<br>(1 in 6624) | NA                  | 0.02<br>(1 in 5655) | NA                  | 0.02<br>(1 in 4851) | NA                 | 0.13<br>(1 in 780)  | NA                 | 0.19<br>(1 in 535)  | NA                 |
| High-middle SDI              | Kidney cancer            | 0.10<br>(1 in 958)   | 0.07<br>(1 in 1376) | 0.19<br>(1 in 520)  | 0.09<br>(1 in 1141) | 0.33<br>(1 in 307)  | 0.17<br>(1 in 593)  | 0.39<br>(1 in 255)  | 0.22<br>(1 in 446) | 1.00<br>(1 in 100)  | 0.53<br>(1 in 188) | 1.01<br>(1 in 99)   | 0.55<br>(1 in 181) |
| High-middle SDI              | Bladder cancer           | 0.06<br>(1 in 1588)  | 0.02<br>(1 in 4868) | 0.18<br>(1 in 542)  | 0.04<br>(1 in 2558) | 0.52<br>(1 in 193)  | 0.09<br>(1 in 1135) | 0.98<br>(1 in 103)  | 0.18<br>(1 in 568) | 1.73<br>(1 in 58)   | 0.32<br>(1 in 311) | 1.73<br>(1 in 58)   | 0.32<br>(1 in 309) |
| High-middle SDI              | Brain and nervous system | 0.19<br>(1 in 529)   | 0.19<br>(1 in 527)  | 0.11<br>(1 in 910)  | 0.10<br>(1 in 1025) | 0.18<br>(1 in 564)  | 0.14<br>(1 in 718)  | 0.21<br>(1 in 473)  | 0.16<br>(1 in 630) | 0.61<br>(1 in 163)  | 0.51<br>(1 in 196) | 0.69<br>(1 in 146)  | 0.58<br>(1 in 171) |

| Location/<br>SDI<br>quintile | Cancer                    | Birth to age 49      |                      | Age 50 to 59        |                      | Age 60 to 69        |                     | Age 70 to 79        |                     | Age 30 to 70        |                     | Birth to age 79     |                     |
|------------------------------|---------------------------|----------------------|----------------------|---------------------|----------------------|---------------------|---------------------|---------------------|---------------------|---------------------|---------------------|---------------------|---------------------|
|                              |                           | Male                 | Female               | Male                | Female               | Male                | Female              | Male                | Female              | Male                | Female              | Male                | Female              |
|                              | cancer                    |                      |                      |                     |                      |                     |                     |                     |                     |                     |                     |                     |                     |
| <b>High-middle SDI</b>       | Thyroid cancer            | 0.07<br>(1 in 1484)  | 0.19<br>(1 in 524)   | 0.06<br>(1 in 1798) | 0.12<br>(1 in 802)   | 0.05<br>(1 in 2027) | 0.13<br>(1 in 752)  | 0.05<br>(1 in 1959) | 0.11<br>(1 in 948)  | 0.21<br>(1 in 473)  | 0.53<br>(1 in 190)  | 0.22<br>(1 in 448)  | 0.55<br>(1 in 181)  |
| <b>High-middle SDI</b>       | Mesothelioma              | 0.01<br>(1 in 14905) | 0.00<br>(1 in 22172) | 0.01<br>(1 in 8210) | 0.01<br>(1 in 15635) | 0.02<br>(1 in 5808) | 0.01<br>(1 in 8585) | 0.03<br>(1 in 3386) | 0.02<br>(1 in 5731) | 0.06<br>(1 in 1543) | 0.04<br>(1 in 2548) | 0.07<br>(1 in 1524) | 0.04<br>(1 in 2500) |
| <b>High-middle SDI</b>       | Hodgkin lymphoma          | 0.06<br>(1 in 1740)  | 0.05<br>(1 in 2046)  | 0.02<br>(1 in 4507) | 0.01<br>(1 in 12074) | 0.03<br>(1 in 3502) | 0.01<br>(1 in 9919) | 0.03<br>(1 in 3984) | 0.01<br>(1 in 8950) | 0.11<br>(1 in 939)  | 0.05<br>(1 in 1911) | 0.13<br>(1 in 750)  | 0.08<br>(1 in 1276) |
| <b>High-middle SDI</b>       | Non-Hodgkin lymphoma      | 0.13<br>(1 in 759)   | 0.09<br>(1 in 1060)  | 0.13<br>(1 in 760)  | 0.09<br>(1 in 1127)  | 0.22<br>(1 in 457)  | 0.16<br>(1 in 619)  | 0.31<br>(1 in 327)  | 0.22<br>(1 in 463)  | 0.75<br>(1 in 133)  | 0.54<br>(1 in 187)  | 0.79<br>(1 in 127)  | 0.56<br>(1 in 179)  |
| <b>High-middle SDI</b>       | Multiple myeloma          | 0.02<br>(1 in 4624)  | 0.01<br>(1 in 7037)  | 0.04<br>(1 in 2294) | 0.03<br>(1 in 3060)  | 0.09<br>(1 in 1120) | 0.07<br>(1 in 1450) | 0.14<br>(1 in 721)  | 0.10<br>(1 in 1051) | 0.29<br>(1 in 345)  | 0.21<br>(1 in 479)  | 0.29<br>(1 in 342)  | 0.21<br>(1 in 474)  |
| <b>High-middle SDI</b>       | Leukemia                  | 0.20<br>(1 in 505)   | 0.15<br>(1 in 678)   | 0.15<br>(1 in 686)  | 0.09<br>(1 in 1065)  | 0.28<br>(1 in 362)  | 0.15<br>(1 in 647)  | 0.40<br>(1 in 249)  | 0.21<br>(1 in 474)  | 0.92<br>(1 in 109)  | 0.53<br>(1 in 189)  | 1.02<br>(1 in 98)   | 0.61<br>(1 in 165)  |
| <b>High-middle SDI</b>       | Acute lymphoid leukemia   | 0.05<br>(1 in 2023)  | 0.03<br>(1 in 2952)  | 0.01<br>(1 in 6993) | 0.01<br>(1 in 10607) | 0.02<br>(1 in 4641) | 0.01<br>(1 in 8178) | 0.03<br>(1 in 3982) | 0.01<br>(1 in 7386) | 0.08<br>(1 in 1322) | 0.04<br>(1 in 2277) | 0.11<br>(1 in 906)  | 0.07<br>(1 in 1448) |
| <b>High-middle SDI</b>       | Chronic lymphoid leukemia | 0.02<br>(1 in 4904)  | 0.02<br>(1 in 5422)  | 0.04<br>(1 in 2292) | 0.03<br>(1 in 3749)  | 0.09<br>(1 in 1099) | 0.05<br>(1 in 1917) | 0.13<br>(1 in 763)  | 0.08<br>(1 in 1307) | 0.28<br>(1 in 356)  | 0.17<br>(1 in 588)  | 0.29<br>(1 in 350)  | 0.17<br>(1 in 576)  |



| Location/<br>SDI<br>quintile | Cancer                     | Birth to age 49     |                      | Age 50 to 59        |                      | Age 60 to 69        |                      | Age 70 to 79        |                      | Age 30 to 70        |                     | Birth to age 79     |                     |
|------------------------------|----------------------------|---------------------|----------------------|---------------------|----------------------|---------------------|----------------------|---------------------|----------------------|---------------------|---------------------|---------------------|---------------------|
|                              |                            | Male                | Female               | Male                | Female               | Male                | Female               | Male                | Female               | Male                | Female              | Male                | Female              |
| <b>High-middle SDI</b>       | Acute myeloid leukemia     | 0.04<br>(1 in 2340) | 0.04<br>(1 in 2686)  | 0.03<br>(1 in 3657) | 0.02<br>(1 in 4854)  | 0.05<br>(1 in 2199) | 0.03<br>(1 in 3127)  | 0.07<br>(1 in 1464) | 0.04<br>(1 in 2292)  | 0.16<br>(1 in 612)  | 0.12<br>(1 in 868)  | 0.18<br>(1 in 544)  | 0.13<br>(1 in 750)  |
| <b>High-middle SDI</b>       | Chronic myeloid leukemia   | 0.01<br>(1 in 8011) | 0.01<br>(1 in 12011) | 0.01<br>(1 in 9951) | 0.01<br>(1 in 13435) | 0.01<br>(1 in 6856) | 0.01<br>(1 in 10317) | 0.02<br>(1 in 4127) | 0.01<br>(1 in 7676)  | 0.06<br>(1 in 1714) | 0.04<br>(1 in 2765) | 0.06<br>(1 in 1630) | 0.04<br>(1 in 2598) |
| <b>High-middle SDI</b>       | Other leukemia             | 0.07<br>(1 in 1368) | 0.05<br>(1 in 2013)  | 0.05<br>(1 in 1979) | 0.03<br>(1 in 3361)  | 0.10<br>(1 in 964)  | 0.05<br>(1 in 2060)  | 0.15<br>(1 in 654)  | 0.06<br>(1 in 1550)  | 0.34<br>(1 in 291)  | 0.17<br>(1 in 602)  | 0.38<br>(1 in 263)  | 0.19<br>(1 in 520)  |
| <b>High-middle SDI</b>       | Other neoplasms            | 0.27<br>(1 in 364)  | 0.29<br>(1 in 350)   | 0.20<br>(1 in 491)  | 0.16<br>(1 in 624)   | 0.37<br>(1 in 270)  | 0.25<br>(1 in 398)   | 0.59<br>(1 in 170)  | 0.38<br>(1 in 262)   | 1.34<br>(1 in 75)   | 0.97<br>(1 in 103)  | 1.43<br>(1 in 70)   | 1.07<br>(1 in 93)   |
| <b>High SDI</b>              | Neoplasms                  | 4.06<br>(1 in 25)   | 5.73<br>(1 in 17)    | 7.47<br>(1 in 13)   | 6.82<br>(1 in 15)    | 17.53<br>(1 in 6)   | 10.93<br>(1 in 9)    | 27.52<br>(1 in 4)   | 15.03<br>(1 in 7)    | 46.51<br>(1 in 2)   | 33.02<br>(1 in 3)   | 46.94<br>(1 in 2)   | 33.51<br>(1 in 3)   |
| <b>High SDI</b>              | Lip and oral cavity cancer | 0.10<br>(1 in 1045) | 0.04<br>(1 in 2256)  | 0.19<br>(1 in 524)  | 0.06<br>(1 in 1618)  | 0.28<br>(1 in 352)  | 0.10<br>(1 in 1010)  | 0.34<br>(1 in 296)  | 0.15<br>(1 in 648)   | 0.90<br>(1 in 111)  | 0.35<br>(1 in 283)  | 0.91<br>(1 in 110)  | 0.36<br>(1 in 279)  |
| <b>High SDI</b>              | Nasopharynx cancer         | 0.03<br>(1 in 3169) | 0.01<br>(1 in 8988)  | 0.02<br>(1 in 4097) | 0.01<br>(1 in 12361) | 0.03<br>(1 in 3255) | 0.01<br>(1 in 16647) | 0.04<br>(1 in 2758) | 0.01<br>(1 in 17432) | 0.12<br>(1 in 846)  | 0.03<br>(1 in 3519) | 0.12<br>(1 in 814)  | 0.03<br>(1 in 3230) |
| <b>High SDI</b>              | Other pharynx cancer       | 0.05<br>(1 in 2022) | 0.01<br>(1 in 9395)  | 0.17<br>(1 in 604)  | 0.03<br>(1 in 3370)  | 0.23<br>(1 in 442)  | 0.04<br>(1 in 2233)  | 0.17<br>(1 in 580)  | 0.04<br>(1 in 2641)  | 0.61<br>(1 in 163)  | 0.12<br>(1 in 818)  | 0.61<br>(1 in 163)  | 0.12<br>(1 in 814)  |
| <b>High SDI</b>              | Esophageal cancer          | 0.05<br>(1 in 1898) | 0.01<br>(1 in 9011)  | 0.17<br>(1 in 588)  | 0.03<br>(1 in 3493)  | 0.38<br>(1 in 266)  | 0.06<br>(1 in 1626)  | 0.55<br>(1 in 182)  | 0.10<br>(1 in 955)   | 1.14<br>(1 in 88)   | 0.21<br>(1 in 487)  | 1.14<br>(1 in 87)   | 0.21<br>(1 in 486)  |

| Location/<br>SDI<br>quintile | Cancer                               | Birth to age 49     |                      | Age 50 to 59        |                     | Age 60 to 69       |                     | Age 70 to 79       |                     | Age 30 to 70       |                     | Birth to age 79    |                     |
|------------------------------|--------------------------------------|---------------------|----------------------|---------------------|---------------------|--------------------|---------------------|--------------------|---------------------|--------------------|---------------------|--------------------|---------------------|
|                              |                                      | Male                | Female               | Male                | Female              | Male               | Female              | Male               | Female              | Male               | Female              | Male               | Female              |
| High SDI                     | Stomach cancer                       | 0.13<br>(1 in 775)  | 0.10<br>(1 in 1000)  | 0.30<br>(1 in 328)  | 0.13<br>(1 in 748)  | 0.79<br>(1 in 126) | 0.28<br>(1 in 353)  | 1.66<br>(1 in 60)  | 0.62<br>(1 in 161)  | 2.86<br>(1 in 35)  | 1.13<br>(1 in 89)   | 2.86<br>(1 in 35)  | 1.13<br>(1 in 88)   |
| High SDI                     | Colon and rectum cancer              | 0.35<br>(1 in 286)  | 0.30<br>(1 in 332)   | 0.90<br>(1 in 111)  | 0.62<br>(1 in 161)  | 2.11<br>(1 in 47)  | 1.21<br>(1 in 82)   | 3.66<br>(1 in 27)  | 2.15<br>(1 in 47)   | 6.86<br>(1 in 15)  | 4.21<br>(1 in 24)   | 6.87<br>(1 in 15)  | 4.22<br>(1 in 24)   |
| High SDI                     | Liver cancer                         | 0.13<br>(1 in 769)  | 0.04<br>(1 in 2673)  | 0.35<br>(1 in 282)  | 0.08<br>(1 in 1261) | 0.64<br>(1 in 156) | 0.18<br>(1 in 550)  | 1.04<br>(1 in 96)  | 0.40<br>(1 in 249)  | 2.14<br>(1 in 47)  | 0.69<br>(1 in 144)  | 2.15<br>(1 in 47)  | 0.70<br>(1 in 143)  |
| High SDI                     | Gallbladder and biliary tract cancer | 0.01<br>(1 in 7005) | 0.01<br>(1 in 7787)  | 0.04<br>(1 in 2690) | 0.03<br>(1 in 2890) | 0.13<br>(1 in 770) | 0.11<br>(1 in 895)  | 0.30<br>(1 in 335) | 0.25<br>(1 in 408)  | 0.48<br>(1 in 209) | 0.40<br>(1 in 248)  | 0.48<br>(1 in 209) | 0.40<br>(1 in 248)  |
| High SDI                     | Pancreatic cancer                    | 0.05<br>(1 in 1841) | 0.03<br>(1 in 2932)  | 0.18<br>(1 in 570)  | 0.11<br>(1 in 921)  | 0.44<br>(1 in 225) | 0.30<br>(1 in 332)  | 0.82<br>(1 in 122) | 0.63<br>(1 in 158)  | 1.49<br>(1 in 67)  | 1.07<br>(1 in 93)   | 1.49<br>(1 in 67)  | 1.07<br>(1 in 93)   |
| High SDI                     | Larynx cancer                        | 0.03<br>(1 in 2997) | 0.01<br>(1 in 15179) | 0.14<br>(1 in 705)  | 0.02<br>(1 in 4782) | 0.26<br>(1 in 378) | 0.03<br>(1 in 3072) | 0.31<br>(1 in 318) | 0.03<br>(1 in 2939) | 0.75<br>(1 in 133) | 0.09<br>(1 in 1072) | 0.75<br>(1 in 133) | 0.09<br>(1 in 1063) |
| High SDI                     | Tracheal, bronchus, and lung cancer  | 0.19<br>(1 in 537)  | 0.16<br>(1 in 623)   | 0.83<br>(1 in 120)  | 0.54<br>(1 in 184)  | 2.31<br>(1 in 43)  | 1.22<br>(1 in 82)   | 4.16<br>(1 in 24)  | 1.91<br>(1 in 52)   | 7.33<br>(1 in 14)  | 3.78<br>(1 in 26)   | 7.33<br>(1 in 14)  | 3.78<br>(1 in 26)   |
| High SDI                     | Malignant skin melanoma              | 0.34<br>(1 in 292)  | 0.42<br>(1 in 236)   | 0.31<br>(1 in 319)  | 0.24<br>(1 in 420)  | 0.52<br>(1 in 194) | 0.29<br>(1 in 346)  | 0.73<br>(1 in 137) | 0.34<br>(1 in 293)  | 1.83<br>(1 in 55)  | 1.20<br>(1 in 83)   | 1.89<br>(1 in 53)  | 1.29<br>(1 in 78)   |

| Location/<br>SDI<br>quintile | Cancer                                             | Birth to age 49      |                     | Age 50 to 59        |                    | Age 60 to 69        |                    | Age 70 to 79        |                    | Age 30 to 70       |                    | Birth to age 79    |                    |
|------------------------------|----------------------------------------------------|----------------------|---------------------|---------------------|--------------------|---------------------|--------------------|---------------------|--------------------|--------------------|--------------------|--------------------|--------------------|
|                              |                                                    | Male                 | Female              | Male                | Female             | Male                | Female             | Male                | Female             | Male               | Female             | Male               | Female             |
| High SDI                     | Non-melanoma skin cancer (squamous-cell carcinoma) | 0.08<br>(1 in 1319)  | 0.09<br>(1 in 1120) | 0.38<br>(1 in 262)  | 0.18<br>(1 in 549) | 1.32<br>(1 in 76)   | 0.57<br>(1 in 176) | 2.42<br>(1 in 41)   | 1.05<br>(1 in 96)  | 4.14<br>(1 in 24)  | 1.87<br>(1 in 54)  | 4.15<br>(1 in 24)  | 1.88<br>(1 in 53)  |
| High SDI                     | Non-melanoma skin cancer (basal-cell carcinoma)    | 0.38<br>(1 in 264)   | 0.40<br>(1 in 249)  | 0.55<br>(1 in 182)  | 0.50<br>(1 in 199) | 1.02<br>(1 in 98)   | 0.79<br>(1 in 127) | 1.55<br>(1 in 65)   | 1.06<br>(1 in 94)  | 3.41<br>(1 in 29)  | 2.67<br>(1 in 37)  | 3.46<br>(1 in 29)  | 2.73<br>(1 in 37)  |
| High SDI                     | Breast cancer                                      | 0.01<br>(1 in 10052) | 1.93<br>(1 in 52)   | 0.02<br>(1 in 5862) | 2.22<br>(1 in 45)  | 0.04<br>(1 in 2686) | 2.89<br>(1 in 35)  | 0.05<br>(1 in 1904) | 2.93<br>(1 in 34)  | 0.11<br>(1 in 870) | 9.55<br>(1 in 10)  | 0.12<br>(1 in 857) | 9.61<br>(1 in 10)  |
| High SDI                     | Cervical cancer                                    | NA                   | 0.37<br>(1 in 270)  | NA                  | 0.18<br>(1 in 546) | NA                  | 0.18<br>(1 in 564) | NA                  | 0.16<br>(1 in 609) | NA                 | 0.85<br>(1 in 117) | NA                 | 0.89<br>(1 in 112) |
| High SDI                     | Uterine cancer                                     | NA                   | 0.25<br>(1 in 394)  | NA                  | 0.66<br>(1 in 152) | NA                  | 0.98<br>(1 in 102) | NA                  | 0.89<br>(1 in 113) | NA                 | 2.74<br>(1 in 36)  | NA                 | 2.75<br>(1 in 36)  |
| High SDI                     | Ovarian cancer                                     | NA                   | 0.21<br>(1 in 487)  | NA                  | 0.24<br>(1 in 425) | NA                  | 0.34<br>(1 in 296) | NA                  | 0.40<br>(1 in 247) | NA                 | 1.15<br>(1 in 87)  | NA                 | 1.18<br>(1 in 85)  |
| High SDI                     | Prostate cancer                                    | 0.19<br>(1 in 522)   | NA                  | 1.47<br>(1 in 68)   | NA                 | 5.27<br>(1 in 19)   | NA                 | 8.15<br>(1 in 12)   | NA                 | 14.43<br>(1 in 7)  | NA                 | 14.44<br>(1 in 7)  | NA                 |

| Location/<br>SDI<br>quintile | Cancer                          | Birth to age 49      |                      | Age 50 to 59        |                      | Age 60 to 69        |                     | Age 70 to 79        |                     | Age 30 to 70       |                     | Birth to age 79    |                     |
|------------------------------|---------------------------------|----------------------|----------------------|---------------------|----------------------|---------------------|---------------------|---------------------|---------------------|--------------------|---------------------|--------------------|---------------------|
|                              |                                 | Male                 | Female               | Male                | Female               | Male                | Female              | Male                | Female              | Male               | Female              | Male               | Female              |
| High SDI                     | Testicular cancer               | 0.43<br>(1 in 232)   | NA                   | 0.04<br>(1 in 2226) | NA                   | 0.02<br>(1 in 4538) | NA                  | 0.01<br>(1 in 7198) | NA                  | 0.33<br>(1 in 306) | NA                  | 0.51<br>(1 in 195) | NA                  |
| High SDI                     | Kidney cancer                   | 0.16<br>(1 in 639)   | 0.10<br>(1 in 1029)  | 0.29<br>(1 in 349)  | 0.13<br>(1 in 760)   | 0.52<br>(1 in 194)  | 0.25<br>(1 in 408)  | 0.75<br>(1 in 133)  | 0.38<br>(1 in 263)  | 1.69<br>(1 in 59)  | 0.83<br>(1 in 120)  | 1.70<br>(1 in 59)  | 0.85<br>(1 in 117)  |
| High SDI                     | Bladder cancer                  | 0.08<br>(1 in 1227)  | 0.04<br>(1 in 2800)  | 0.27<br>(1 in 375)  | 0.07<br>(1 in 1388)  | 0.71<br>(1 in 140)  | 0.16<br>(1 in 618)  | 1.39<br>(1 in 72)   | 0.32<br>(1 in 316)  | 2.43<br>(1 in 41)  | 0.58<br>(1 in 172)  | 2.44<br>(1 in 41)  | 0.58<br>(1 in 171)  |
| High SDI                     | Brain and nervous system cancer | 0.21<br>(1 in 478)   | 0.18<br>(1 in 552)   | 0.12<br>(1 in 808)  | 0.10<br>(1 in 1045)  | 0.20<br>(1 in 503)  | 0.15<br>(1 in 669)  | 0.26<br>(1 in 384)  | 0.20<br>(1 in 503)  | 0.71<br>(1 in 140) | 0.55<br>(1 in 181)  | 0.79<br>(1 in 127) | 0.62<br>(1 in 160)  |
| High SDI                     | Thyroid cancer                  | 0.15<br>(1 in 658)   | 0.31<br>(1 in 324)   | 0.14<br>(1 in 701)  | 0.21<br>(1 in 466)   | 0.14<br>(1 in 697)  | 0.24<br>(1 in 424)  | 0.13<br>(1 in 761)  | 0.19<br>(1 in 516)  | 0.55<br>(1 in 182) | 0.92<br>(1 in 109)  | 0.57<br>(1 in 176) | 0.95<br>(1 in 105)  |
| High SDI                     | Mesothelioma                    | 0.01<br>(1 in 17019) | 0.00<br>(1 in 29776) | 0.02<br>(1 in 4678) | 0.01<br>(1 in 15619) | 0.07<br>(1 in 1415) | 0.02<br>(1 in 6542) | 0.15<br>(1 in 675)  | 0.03<br>(1 in 3403) | 0.25<br>(1 in 407) | 0.05<br>(1 in 1853) | 0.25<br>(1 in 407) | 0.05<br>(1 in 1837) |
| High SDI                     | Hodgkin lymphoma                | 0.16<br>(1 in 611)   | 0.13<br>(1 in 759)   | 0.04<br>(1 in 2577) | 0.02<br>(1 in 4956)  | 0.04<br>(1 in 2561) | 0.02<br>(1 in 4695) | 0.04<br>(1 in 2625) | 0.02<br>(1 in 4407) | 0.21<br>(1 in 487) | 0.13<br>(1 in 792)  | 0.28<br>(1 in 358) | 0.20<br>(1 in 511)  |
| High SDI                     | Non-Hodgkin lymphoma            | 0.26<br>(1 in 380)   | 0.18<br>(1 in 565)   | 0.32<br>(1 in 314)  | 0.22<br>(1 in 455)   | 0.57<br>(1 in 176)  | 0.40<br>(1 in 250)  | 0.94<br>(1 in 106)  | 0.64<br>(1 in 156)  | 2.03<br>(1 in 49)  | 1.40<br>(1 in 71)   | 2.08<br>(1 in 48)  | 1.43<br>(1 in 70)   |

| Location/<br>SDI<br>quintile | Cancer                    | Birth to age 49     |                      | Age 50 to 59        |                      | Age 60 to 69        |                     | Age 70 to 79        |                     | Age 30 to 70        |                     | Birth to age 79    |                     |
|------------------------------|---------------------------|---------------------|----------------------|---------------------|----------------------|---------------------|---------------------|---------------------|---------------------|---------------------|---------------------|--------------------|---------------------|
|                              |                           | Male                | Female               | Male                | Female               | Male                | Female              | Male                | Female              | Male                | Female              | Male               | Female              |
| High SDI                     | Multiple myeloma          | 0.03<br>(1 in 3203) | 0.02<br>(1 in 5284)  | 0.09<br>(1 in 1149) | 0.06<br>(1 in 1715)  | 0.19<br>(1 in 535)  | 0.13<br>(1 in 766)  | 0.36<br>(1 in 278)  | 0.24<br>(1 in 409)  | 0.66<br>(1 in 151)  | 0.45<br>(1 in 222)  | 0.66<br>(1 in 151) | 0.45<br>(1 in 221)  |
| High SDI                     | Leukemia                  | 0.16<br>(1 in 634)  | 0.11<br>(1 in 883)   | 0.17<br>(1 in 582)  | 0.11<br>(1 in 927)   | 0.41<br>(1 in 245)  | 0.22<br>(1 in 456)  | 0.76<br>(1 in 132)  | 0.41<br>(1 in 242)  | 1.42<br>(1 in 71)   | 0.80<br>(1 in 125)  | 1.49<br>(1 in 67)  | 0.85<br>(1 in 117)  |
| High SDI                     | Acute lymphoid leukemia   | 0.06<br>(1 in 1727) | 0.04<br>(1 in 2560)  | 0.01<br>(1 in 6914) | 0.01<br>(1 in 9897)  | 0.02<br>(1 in 4729) | 0.01<br>(1 in 7857) | 0.03<br>(1 in 3906) | 0.02<br>(1 in 6025) | 0.07<br>(1 in 1347) | 0.05<br>(1 in 2101) | 0.12<br>(1 in 840) | 0.08<br>(1 in 1274) |
| High SDI                     | Chronic lymphoid leukemia | 0.02<br>(1 in 5718) | 0.01<br>(1 in 7791)  | 0.07<br>(1 in 1499) | 0.03<br>(1 in 2909)  | 0.17<br>(1 in 589)  | 0.08<br>(1 in 1270) | 0.30<br>(1 in 335)  | 0.15<br>(1 in 656)  | 0.55<br>(1 in 182)  | 0.28<br>(1 in 362)  | 0.55<br>(1 in 181) | 0.28<br>(1 in 360)  |
| High SDI                     | Acute myeloid leukemia    | 0.04<br>(1 in 2272) | 0.04<br>(1 in 2706)  | 0.05<br>(1 in 2115) | 0.04<br>(1 in 2790)  | 0.11<br>(1 in 915)  | 0.07<br>(1 in 1458) | 0.20<br>(1 in 492)  | 0.12<br>(1 in 801)  | 0.39<br>(1 in 257)  | 0.25<br>(1 in 393)  | 0.40<br>(1 in 248) | 0.27<br>(1 in 376)  |
| High SDI                     | Chronic myeloid leukemia  | 0.02<br>(1 in 6406) | 0.01<br>(1 in 10839) | 0.02<br>(1 in 6421) | 0.01<br>(1 in 10660) | 0.02<br>(1 in 4405) | 0.01<br>(1 in 7608) | 0.05<br>(1 in 2012) | 0.02<br>(1 in 4060) | 0.10<br>(1 in 992)  | 0.05<br>(1 in 1829) | 0.10<br>(1 in 966) | 0.06<br>(1 in 1774) |
| High SDI                     | Other leukemia            | 0.02<br>(1 in 4400) | 0.02<br>(1 in 6584)  | 0.03<br>(1 in 3591) | 0.02<br>(1 in 5472)  | 0.09<br>(1 in 1167) | 0.05<br>(1 in 2156) | 0.18<br>(1 in 546)  | 0.10<br>(1 in 1048) | 0.31<br>(1 in 322)  | 0.17<br>(1 in 589)  | 0.32<br>(1 in 313) | 0.18<br>(1 in 571)  |
| High SDI                     | Other neoplasms           | 0.36<br>(1 in 275)  | 0.40<br>(1 in 252)   | 0.21<br>(1 in 470)  | 0.22<br>(1 in 462)   | 0.40<br>(1 in 248)  | 0.34<br>(1 in 296)  | 0.83<br>(1 in 121)  | 0.60<br>(1 in 166)  | 1.67<br>(1 in 60)   | 1.41<br>(1 in 71)   | 1.80<br>(1 in 56)  | 1.54<br>(1 in 65)   |
| Low-middle SDI               | Neoplasms                 | 1.54<br>(1 in 65)   | 2.39<br>(1 in 42)    | 2.22<br>(1 in 45)   | 2.54<br>(1 in 39)    | 4.58<br>(1 in 22)   | 3.55<br>(1 in 28)   | 6.92<br>(1 in 14)   | 4.42<br>(1 in 23)   | 14.25<br>(1 in 7)   | 12.04<br>(1 in 8)   | 14.49<br>(1 in 7)  | 12.30<br>(1 in 8)   |

| Location/<br>SDI<br>quintile | Cancer                               | Birth to age 49     |                     | Age 50 to 59        |                     | Age 60 to 69        |                     | Age 70 to 79        |                     | Age 30 to 70       |                     | Birth to age 79    |                     |
|------------------------------|--------------------------------------|---------------------|---------------------|---------------------|---------------------|---------------------|---------------------|---------------------|---------------------|--------------------|---------------------|--------------------|---------------------|
|                              |                                      | Male                | Female              | Male                | Female              | Male                | Female              | Male                | Female              | Male               | Female              | Male               | Female              |
| <b>Low-middle SDI</b>        | Lip and oral cavity cancer           | 0.18<br>(1 in 562)  | 0.15<br>(1 in 655)  | 0.23<br>(1 in 440)  | 0.18<br>(1 in 558)  | 0.36<br>(1 in 278)  | 0.29<br>(1 in 350)  | 0.46<br>(1 in 218)  | 0.33<br>(1 in 305)  | 1.20<br>(1 in 83)  | 0.92<br>(1 in 108)  | 1.22<br>(1 in 82)  | 0.94<br>(1 in 106)  |
| <b>Low-middle SDI</b>        | Nasopharynx cancer                   | 0.04<br>(1 in 2235) | 0.02<br>(1 in 6663) | 0.04<br>(1 in 2762) | 0.01<br>(1 in 7275) | 0.05<br>(1 in 2171) | 0.02<br>(1 in 6556) | 0.04<br>(1 in 2278) | 0.02<br>(1 in 6322) | 0.16<br>(1 in 616) | 0.06<br>(1 in 1745) | 0.17<br>(1 in 586) | 0.06<br>(1 in 1672) |
| <b>Low-middle SDI</b>        | Other pharynx cancer                 | 0.07<br>(1 in 1350) | 0.04<br>(1 in 2319) | 0.15<br>(1 in 673)  | 0.07<br>(1 in 1455) | 0.26<br>(1 in 378)  | 0.11<br>(1 in 930)  | 0.31<br>(1 in 328)  | 0.12<br>(1 in 844)  | 0.79<br>(1 in 127) | 0.33<br>(1 in 301)  | 0.79<br>(1 in 127) | 0.34<br>(1 in 296)  |
| <b>Low-middle SDI</b>        | Esophageal cancer                    | 0.05<br>(1 in 1912) | 0.03<br>(1 in 3059) | 0.10<br>(1 in 963)  | 0.06<br>(1 in 1746) | 0.21<br>(1 in 481)  | 0.09<br>(1 in 1055) | 0.29<br>(1 in 341)  | 0.15<br>(1 in 645)  | 0.65<br>(1 in 153) | 0.34<br>(1 in 297)  | 0.66<br>(1 in 153) | 0.34<br>(1 in 295)  |
| <b>Low-middle SDI</b>        | Stomach cancer                       | 0.12<br>(1 in 855)  | 0.11<br>(1 in 921)  | 0.21<br>(1 in 475)  | 0.15<br>(1 in 684)  | 0.45<br>(1 in 221)  | 0.28<br>(1 in 356)  | 0.70<br>(1 in 143)  | 0.44<br>(1 in 228)  | 1.46<br>(1 in 68)  | 0.96<br>(1 in 104)  | 1.47<br>(1 in 68)  | 0.97<br>(1 in 103)  |
| <b>Low-middle SDI</b>        | Colon and rectum cancer              | 0.10<br>(1 in 960)  | 0.09<br>(1 in 1116) | 0.14<br>(1 in 723)  | 0.15<br>(1 in 674)  | 0.32<br>(1 in 312)  | 0.25<br>(1 in 404)  | 0.52<br>(1 in 193)  | 0.44<br>(1 in 225)  | 1.06<br>(1 in 94)  | 0.92<br>(1 in 109)  | 1.08<br>(1 in 93)  | 0.93<br>(1 in 108)  |
| <b>Low-middle SDI</b>        | Liver cancer                         | 0.13<br>(1 in 767)  | 0.05<br>(1 in 1988) | 0.18<br>(1 in 568)  | 0.08<br>(1 in 1289) | 0.32<br>(1 in 311)  | 0.15<br>(1 in 668)  | 0.45<br>(1 in 223)  | 0.24<br>(1 in 423)  | 1.06<br>(1 in 95)  | 0.51<br>(1 in 197)  | 1.07<br>(1 in 93)  | 0.51<br>(1 in 195)  |
| <b>Low-middle SDI</b>        | Gallbladder and biliary tract cancer | 0.02<br>(1 in 6129) | 0.04<br>(1 in 2634) | 0.03<br>(1 in 3083) | 0.07<br>(1 in 1513) | 0.06<br>(1 in 1559) | 0.11<br>(1 in 921)  | 0.09<br>(1 in 1140) | 0.12<br>(1 in 803)  | 0.20<br>(1 in 500) | 0.34<br>(1 in 298)  | 0.20<br>(1 in 499) | 0.34<br>(1 in 297)  |
| <b>Low-middle SDI</b>        | Pancreatic cancer                    | 0.02<br>(1 in 4054) | 0.02<br>(1 in 5629) | 0.06<br>(1 in 1730) | 0.04<br>(1 in 2419) | 0.13<br>(1 in 770)  | 0.10<br>(1 in 964)  | 0.21<br>(1 in 466)  | 0.18<br>(1 in 561)  | 0.43<br>(1 in 235) | 0.34<br>(1 in 294)  | 0.43<br>(1 in 234) | 0.34<br>(1 in 293)  |

| Location/<br>SDI<br>quintile | Cancer                                             | Birth to age 49      |                      | Age 50 to 59         |                      | Age 60 to 69        |                     | Age 70 to 79        |                     | Age 30 to 70        |                     | Birth to age 79     |                     |
|------------------------------|----------------------------------------------------|----------------------|----------------------|----------------------|----------------------|---------------------|---------------------|---------------------|---------------------|---------------------|---------------------|---------------------|---------------------|
|                              |                                                    | Male                 | Female               | Male                 | Female               | Male                | Female              | Male                | Female              | Male                | Female              | Male                | Female              |
| <b>Low-middle SDI</b>        | Larynx cancer                                      | 0.04<br>(1 in 2344)  | 0.01<br>(1 in 8241)  | 0.12<br>(1 in 859)   | 0.02<br>(1 in 5070)  | 0.22<br>(1 in 453)  | 0.03<br>(1 in 3205) | 0.24<br>(1 in 418)  | 0.04<br>(1 in 2248) | 0.62<br>(1 in 162)  | 0.11<br>(1 in 936)  | 0.62<br>(1 in 162)  | 0.11<br>(1 in 930)  |
| <b>Low-middle SDI</b>        | Tracheal, bronchus, and lung cancer                | 0.13<br>(1 in 791)   | 0.07<br>(1 in 1460)  | 0.32<br>(1 in 309)   | 0.11<br>(1 in 948)   | 0.74<br>(1 in 136)  | 0.22<br>(1 in 465)  | 1.20<br>(1 in 84)   | 0.39<br>(1 in 259)  | 2.36<br>(1 in 42)   | 0.77<br>(1 in 130)  | 2.37<br>(1 in 42)   | 0.77<br>(1 in 129)  |
| <b>Low-middle SDI</b>        | Malignant skin melanoma                            | 0.01<br>(1 in 12368) | 0.01<br>(1 in 14093) | 0.01<br>(1 in 12581) | 0.01<br>(1 in 16213) | 0.01<br>(1 in 8906) | 0.01<br>(1 in 9428) | 0.02<br>(1 in 6231) | 0.02<br>(1 in 5864) | 0.04<br>(1 in 2387) | 0.04<br>(1 in 2543) | 0.04<br>(1 in 2309) | 0.04<br>(1 in 2444) |
| <b>Low-middle SDI</b>        | Non-melanoma skin cancer (squamous-cell carcinoma) | 0.01<br>(1 in 8518)  | 0.01<br>(1 in 11341) | 0.02<br>(1 in 5323)  | 0.01<br>(1 in 9766)  | 0.06<br>(1 in 1638) | 0.02<br>(1 in 4230) | 0.13<br>(1 in 788)  | 0.04<br>(1 in 2328) | 0.22<br>(1 in 463)  | 0.08<br>(1 in 1188) | 0.22<br>(1 in 458)  | 0.09<br>(1 in 1168) |
| <b>Low-middle SDI</b>        | Non-melanoma skin cancer (basal-cell carcinoma)    | 0.06<br>(1 in 1721)  | 0.06<br>(1 in 1738)  | 0.07<br>(1 in 1514)  | 0.06<br>(1 in 1622)  | 0.12<br>(1 in 864)  | 0.10<br>(1 in 1005) | 0.18<br>(1 in 569)  | 0.14<br>(1 in 706)  | 0.41<br>(1 in 247)  | 0.35<br>(1 in 285)  | 0.42<br>(1 in 241)  | 0.36<br>(1 in 278)  |
| <b>Low-middle SDI</b>        | Breast cancer                                      | 0.01<br>(1 in 19160) | 0.62<br>(1 in 161)   | 0.01<br>(1 in 11729) | 0.61<br>(1 in 164)   | 0.02<br>(1 in 5998) | 0.63<br>(1 in 159)  | 0.02<br>(1 in 5234) | 0.61<br>(1 in 164)  | 0.05<br>(1 in 2037) | 2.41<br>(1 in 41)   | 0.05<br>(1 in 2020) | 2.45<br>(1 in 41)   |
| <b>Low-middle SDI</b>        | Cervical cancer                                    | NA                   | 0.48<br>(1 in 207)   | NA                   | 0.38<br>(1 in 263)   | NA                  | 0.37<br>(1 in 267)  | NA                  | 0.27<br>(1 in 368)  | NA                  | 1.47<br>(1 in 68)   | NA                  | 1.50<br>(1 in 67)   |

| Location/<br>SDI<br>quintile | Cancer                          | Birth to age 49     |                     | Age 50 to 59         |                     | Age 60 to 69         |                     | Age 70 to 79         |                     | Age 30 to 70        |                    | Birth to age 79     |                    |
|------------------------------|---------------------------------|---------------------|---------------------|----------------------|---------------------|----------------------|---------------------|----------------------|---------------------|---------------------|--------------------|---------------------|--------------------|
|                              |                                 | Male                | Female              | Male                 | Female              | Male                 | Female              | Male                 | Female              | Male                | Female             | Male                | Female             |
| <b>Low-middle SDI</b>        | Uterine cancer                  | NA                  | 0.05<br>(1 in 2120) | NA                   | 0.10<br>(1 in 1041) | NA                   | 0.14<br>(1 in 730)  | NA                   | 0.13<br>(1 in 792)  | NA                  | 0.40<br>(1 in 248) | NA                  | 0.41<br>(1 in 246) |
| <b>Low-middle SDI</b>        | Ovarian cancer                  | NA                  | 0.13<br>(1 in 792)  | NA                   | 0.13<br>(1 in 746)  | NA                   | 0.15<br>(1 in 663)  | NA                   | 0.14<br>(1 in 700)  | NA                  | 0.53<br>(1 in 187) | NA                  | 0.55<br>(1 in 181) |
| <b>Low-middle SDI</b>        | Prostate cancer                 | 0.02<br>(1 in 5364) | NA                  | 0.11<br>(1 in 938)   | NA                  | 0.53<br>(1 in 190)   | NA                  | 1.15<br>(1 in 87)    | NA                  | 1.79<br>(1 in 56)   | NA                 | 1.79<br>(1 in 56)   | NA                 |
| <b>Low-middle SDI</b>        | Testicular cancer               | 0.02<br>(1 in 4905) | NA                  | 0.00<br>(1 in 27489) | NA                  | 0.00<br>(1 in 20556) | NA                  | 0.01<br>(1 in 13863) | NA                  | 0.03<br>(1 in 3535) | NA                 | 0.04<br>(1 in 2770) | NA                 |
| <b>Low-middle SDI</b>        | Kidney cancer                   | 0.03<br>(1 in 3050) | 0.03<br>(1 in 3861) | 0.05<br>(1 in 2185)  | 0.03<br>(1 in 3849) | 0.07<br>(1 in 1378)  | 0.04<br>(1 in 2557) | 0.09<br>(1 in 1088)  | 0.04<br>(1 in 2262) | 0.24<br>(1 in 421)  | 0.13<br>(1 in 774) | 0.24<br>(1 in 412)  | 0.14<br>(1 in 740) |
| <b>Low-middle SDI</b>        | Bladder cancer                  | 0.03<br>(1 in 3478) | 0.01<br>(1 in 8843) | 0.06<br>(1 in 1621)  | 0.02<br>(1 in 4529) | 0.15<br>(1 in 646)   | 0.05<br>(1 in 2066) | 0.26<br>(1 in 377)   | 0.08<br>(1 in 1206) | 0.51<br>(1 in 197)  | 0.16<br>(1 in 611) | 0.51<br>(1 in 196)  | 0.16<br>(1 in 608) |
| <b>Low-middle SDI</b>        | Brain and nervous system cancer | 0.08<br>(1 in 1326) | 0.06<br>(1 in 1757) | 0.05<br>(1 in 1971)  | 0.04<br>(1 in 2654) | 0.07<br>(1 in 1350)  | 0.05<br>(1 in 1923) | 0.08<br>(1 in 1264)  | 0.06<br>(1 in 1579) | 0.25<br>(1 in 396)  | 0.19<br>(1 in 529) | 0.28<br>(1 in 358)  | 0.21<br>(1 in 477) |
| <b>Low-middle SDI</b>        | Thyroid cancer                  | 0.02<br>(1 in 5734) | 0.07<br>(1 in 1503) | 0.02<br>(1 in 5573)  | 0.05<br>(1 in 2193) | 0.02<br>(1 in 4256)  | 0.05<br>(1 in 2006) | 0.03<br>(1 in 3281)  | 0.05<br>(1 in 1940) | 0.09<br>(1 in 1161) | 0.20<br>(1 in 500) | 0.09<br>(1 in 1120) | 0.21<br>(1 in 469) |



| Location/<br>SDI<br>quintile | Cancer                    | Birth to age 49         |                         | Age 50 to 59            |                         | Age 60 to 69           |                         | Age 70 to 79           |                         | Age 30 to 70           |                        | Birth to age 79        |                        |
|------------------------------|---------------------------|-------------------------|-------------------------|-------------------------|-------------------------|------------------------|-------------------------|------------------------|-------------------------|------------------------|------------------------|------------------------|------------------------|
|                              |                           | Male                    | Female                  | Male                    | Female                  | Male                   | Female                  | Male                   | Female                  | Male                   | Female                 | Male                   | Female                 |
| <b>Low-middle SDI</b>        | Mesothelioma              | 0.00<br>(1 in<br>21896) | 0.00<br>(1 in<br>25655) | 0.01<br>(1 in<br>11490) | 0.00<br>(1 in<br>29155) | 0.01<br>(1 in<br>8098) | 0.01<br>(1 in<br>19678) | 0.02<br>(1 in<br>4850) | 0.01<br>(1 in<br>13703) | 0.05<br>(1 in<br>2188) | 0.02<br>(1 in<br>5250) | 0.05<br>(1 in<br>2163) | 0.02<br>(1 in<br>5075) |
| <b>Low-middle SDI</b>        | Hodgkin lymphoma          | 0.03<br>(1 in<br>3664)  | 0.01<br>(1 in<br>7537)  | 0.01<br>(1 in<br>7807)  | 0.01<br>(1 in<br>17100) | 0.02<br>(1 in<br>5760) | 0.01<br>(1 in<br>10637) | 0.02<br>(1 in<br>5204) | 0.01<br>(1 in<br>10258) | 0.06<br>(1 in<br>1564) | 0.03<br>(1 in<br>3076) | 0.08<br>(1 in<br>1304) | 0.04<br>(1 in<br>2614) |
| <b>Low-middle SDI</b>        | Non-Hodgkin lymphoma      | 0.07<br>(1 in<br>1391)  | 0.05<br>(1 in<br>2153)  | 0.06<br>(1 in<br>1744)  | 0.04<br>(1 in<br>2473)  | 0.10<br>(1 in<br>974)  | 0.08<br>(1 in<br>1318)  | 0.13<br>(1 in<br>749)  | 0.09<br>(1 in<br>1152)  | 0.34<br>(1 in<br>294)  | 0.23<br>(1 in<br>426)  | 0.36<br>(1 in<br>274)  | 0.25<br>(1 in<br>401)  |
| <b>Low-middle SDI</b>        | Multiple myeloma          | 0.01<br>(1 in<br>9611)  | 0.01<br>(1 in<br>10870) | 0.02<br>(1 in<br>5376)  | 0.02<br>(1 in<br>5568)  | 0.03<br>(1 in<br>2877) | 0.04<br>(1 in<br>2580)  | 0.05<br>(1 in<br>2048) | 0.04<br>(1 in<br>2387)  | 0.11<br>(1 in<br>896)  | 0.11<br>(1 in<br>938)  | 0.11<br>(1 in<br>888)  | 0.11<br>(1 in<br>928)  |
| <b>Low-middle SDI</b>        | Leukemia                  | 0.10<br>(1 in<br>993)   | 0.08<br>(1 in<br>1329)  | 0.05<br>(1 in<br>1864)  | 0.05<br>(1 in<br>2212)  | 0.09<br>(1 in<br>1058) | 0.07<br>(1 in<br>1451)  | 0.14<br>(1 in<br>727)  | 0.09<br>(1 in<br>1075)  | 0.34<br>(1 in<br>296)  | 0.25<br>(1 in<br>399)  | 0.39<br>(1 in<br>259)  | 0.28<br>(1 in<br>354)  |
| <b>Low-middle SDI</b>        | Acute lymphoid leukemia   | 0.03<br>(1 in<br>3606)  | 0.02<br>(1 in<br>5643)  | 0.01<br>(1 in<br>12144) | 0.01<br>(1 in<br>17092) | 0.01<br>(1 in<br>8182) | 0.01<br>(1 in<br>13324) | 0.01<br>(1 in<br>6916) | 0.01<br>(1 in<br>11603) | 0.04<br>(1 in<br>2254) | 0.03<br>(1 in<br>3476) | 0.06<br>(1 in<br>1597) | 0.04<br>(1 in<br>2519) |
| <b>Low-middle SDI</b>        | Chronic lymphoid leukemia | 0.00<br>(1 in<br>20261) | 0.01<br>(1 in<br>11572) | 0.01<br>(1 in<br>10696) | 0.01<br>(1 in<br>9670)  | 0.02<br>(1 in<br>4956) | 0.02<br>(1 in<br>4453)  | 0.03<br>(1 in<br>3398) | 0.03<br>(1 in<br>3745)  | 0.06<br>(1 in<br>1599) | 0.07<br>(1 in<br>1500) | 0.06<br>(1 in<br>1566) | 0.07<br>(1 in<br>1468) |
| <b>Low-middle SDI</b>        | Acute myeloid leukemia    | 0.03<br>(1 in<br>3623)  | 0.02<br>(1 in<br>5288)  | 0.01<br>(1 in<br>7175)  | 0.01<br>(1 in<br>11580) | 0.02<br>(1 in<br>4631) | 0.01<br>(1 in<br>8682)  | 0.03<br>(1 in<br>3795) | 0.02<br>(1 in<br>5623)  | 0.08<br>(1 in<br>1295) | 0.05<br>(1 in<br>2058) | 0.09<br>(1 in<br>1118) | 0.06<br>(1 in<br>1759) |
| <b>Low-middle SDI</b>        | Chronic myeloid leukemia  | 0.01<br>(1 in<br>7443)  | 0.01<br>(1 in<br>9410)  | 0.01<br>(1 in<br>11961) | 0.01<br>(1 in<br>12692) | 0.01<br>(1 in<br>8664) | 0.01<br>(1 in<br>10928) | 0.02<br>(1 in<br>6429) | 0.01<br>(1 in<br>9347)  | 0.05<br>(1 in<br>2189) | 0.04<br>(1 in<br>2783) | 0.05<br>(1 in<br>2046) | 0.04<br>(1 in<br>2608) |

| Location/<br>SDI<br>quintile | Cancer                     | Birth to age 49     |                     | Age 50 to 59        |                     | Age 60 to 69        |                     | Age 70 to 79        |                      | Age 30 to 70       |                     | Birth to age 79    |                     |
|------------------------------|----------------------------|---------------------|---------------------|---------------------|---------------------|---------------------|---------------------|---------------------|----------------------|--------------------|---------------------|--------------------|---------------------|
|                              |                            | Male                | Female              | Male                | Female              | Male                | Female              | Male                | Female               | Male               | Female              | Male               | Female              |
| <b>Low-middle SDI</b>        | Other leukemia             | 0.03<br>(1 in 3704) | 0.02<br>(1 in 5162) | 0.01<br>(1 in 7251) | 0.01<br>(1 in 7994) | 0.03<br>(1 in 3449) | 0.02<br>(1 in 5470) | 0.05<br>(1 in 1926) | 0.03<br>(1 in 3418)  | 0.11<br>(1 in 919) | 0.07<br>(1 in 1404) | 0.12<br>(1 in 822) | 0.08<br>(1 in 1259) |
| <b>Low-middle SDI</b>        | Other neoplasms            | 0.15<br>(1 in 659)  | 0.12<br>(1 in 811)  | 0.13<br>(1 in 751)  | 0.10<br>(1 in 1020) | 0.23<br>(1 in 427)  | 0.16<br>(1 in 625)  | 0.32<br>(1 in 314)  | 0.21<br>(1 in 479)   | 0.78<br>(1 in 128) | 0.55<br>(1 in 183)  | 0.83<br>(1 in 120) | 0.59<br>(1 in 170)  |
| <b>Low SDI</b>               | Neoplasms                  | 1.41<br>(1 in 71)   | 2.67<br>(1 in 37)   | 1.81<br>(1 in 55)   | 2.62<br>(1 in 38)   | 3.95<br>(1 in 25)   | 3.84<br>(1 in 26)   | 6.73<br>(1 in 15)   | 4.38<br>(1 in 23)    | 13.03<br>(1 in 8)  | 12.59<br>(1 in 8)   | 13.27<br>(1 in 8)  | 12.85<br>(1 in 8)   |
| <b>Low SDI</b>               | Lip and oral cavity cancer | 0.04<br>(1 in 2362) | 0.05<br>(1 in 2121) | 0.06<br>(1 in 1573) | 0.05<br>(1 in 1862) | 0.10<br>(1 in 995)  | 0.11<br>(1 in 905)  | 0.18<br>(1 in 543)  | 0.12<br>(1 in 857)   | 0.38<br>(1 in 260) | 0.32<br>(1 in 311)  | 0.39<br>(1 in 256) | 0.33<br>(1 in 305)  |
| <b>Low SDI</b>               | Nasopharynx cancer         | 0.03<br>(1 in 2875) | 0.01<br>(1 in 7745) | 0.03<br>(1 in 3588) | 0.02<br>(1 in 6527) | 0.04<br>(1 in 2470) | 0.01<br>(1 in 6973) | 0.03<br>(1 in 3672) | 0.01<br>(1 in 13533) | 0.12<br>(1 in 814) | 0.05<br>(1 in 2120) | 0.13<br>(1 in 767) | 0.05<br>(1 in 2002) |
| <b>Low SDI</b>               | Other pharynx cancer       | 0.01<br>(1 in 7367) | 0.01<br>(1 in 7311) | 0.03<br>(1 in 3640) | 0.02<br>(1 in 4714) | 0.05<br>(1 in 2048) | 0.03<br>(1 in 3102) | 0.05<br>(1 in 2036) | 0.04<br>(1 in 2745)  | 0.14<br>(1 in 724) | 0.10<br>(1 in 980)  | 0.14<br>(1 in 720) | 0.10<br>(1 in 966)  |
| <b>Low SDI</b>               | Esophageal cancer          | 0.07<br>(1 in 1431) | 0.03<br>(1 in 3517) | 0.14<br>(1 in 698)  | 0.06<br>(1 in 1761) | 0.25<br>(1 in 393)  | 0.14<br>(1 in 713)  | 0.42<br>(1 in 237)  | 0.23<br>(1 in 437)   | 0.88<br>(1 in 113) | 0.45<br>(1 in 221)  | 0.89<br>(1 in 113) | 0.45<br>(1 in 220)  |
| <b>Low SDI</b>               | Stomach cancer             | 0.09<br>(1 in 1160) | 0.07<br>(1 in 1342) | 0.15<br>(1 in 667)  | 0.11<br>(1 in 949)  | 0.32<br>(1 in 317)  | 0.22<br>(1 in 447)  | 0.56<br>(1 in 178)  | 0.31<br>(1 in 319)   | 1.10<br>(1 in 91)  | 0.71<br>(1 in 141)  | 1.11<br>(1 in 90)  | 0.72<br>(1 in 140)  |
| <b>Low SDI</b>               | Colon and rectum cancer    | 0.08<br>(1 in 1313) | 0.07<br>(1 in 1342) | 0.12<br>(1 in 856)  | 0.13<br>(1 in 768)  | 0.24<br>(1 in 415)  | 0.23<br>(1 in 430)  | 0.46<br>(1 in 217)  | 0.43<br>(1 in 234)   | 0.88<br>(1 in 113) | 0.86<br>(1 in 117)  | 0.89<br>(1 in 112) | 0.86<br>(1 in 116)  |

| Location/<br>SDI<br>quintile | Cancer                                                              | Birth to age 49         |                         | Age 50 to 59           |                        | Age 60 to 69           |                        | Age 70 to 79           |                        | Age 30 to 70           |                        | Birth to age 79        |                        |
|------------------------------|---------------------------------------------------------------------|-------------------------|-------------------------|------------------------|------------------------|------------------------|------------------------|------------------------|------------------------|------------------------|------------------------|------------------------|------------------------|
|                              |                                                                     | Male                    | Female                  | Male                   | Female                 | Male                   | Female                 | Male                   | Female                 | Male                   | Female                 | Male                   | Female                 |
| <b>Low SDI</b>               | Liver cancer                                                        | 0.19<br>(1 in<br>515)   | 0.09<br>(1 in<br>1065)  | 0.23<br>(1 in<br>431)  | 0.12<br>(1 in<br>841)  | 0.39<br>(1 in<br>259)  | 0.24<br>(1 in<br>412)  | 0.56<br>(1 in<br>177)  | 0.31<br>(1 in<br>323)  | 1.34<br>(1 in<br>74)   | 0.75<br>(1 in<br>133)  | 1.37<br>(1 in<br>73)   | 0.76<br>(1 in<br>131)  |
| <b>Low SDI</b>               | Gallbladder<br>and biliary<br>tract cancer                          | 0.01<br>(1 in<br>12076) | 0.02<br>(1 in<br>5020)  | 0.02<br>(1 in<br>4355) | 0.04<br>(1 in<br>2517) | 0.04<br>(1 in<br>2354) | 0.09<br>(1 in<br>1155) | 0.06<br>(1 in<br>1539) | 0.10<br>(1 in<br>979)  | 0.14<br>(1 in<br>723)  | 0.25<br>(1 in<br>404)  | 0.14<br>(1 in<br>721)  | 0.25<br>(1 in<br>403)  |
| <b>Low SDI</b>               | Pancreatic<br>cancer                                                | 0.03<br>(1 in<br>3703)  | 0.02<br>(1 in<br>4461)  | 0.06<br>(1 in<br>1720) | 0.05<br>(1 in<br>2015) | 0.14<br>(1 in<br>731)  | 0.12<br>(1 in<br>849)  | 0.23<br>(1 in<br>443)  | 0.20<br>(1 in<br>499)  | 0.45<br>(1 in<br>225)  | 0.39<br>(1 in<br>257)  | 0.45<br>(1 in<br>224)  | 0.39<br>(1 in<br>257)  |
| <b>Low SDI</b>               | Larynx<br>cancer                                                    | 0.02<br>(1 in<br>5206)  | 0.01<br>(1 in<br>14172) | 0.06<br>(1 in<br>1751) | 0.01<br>(1 in<br>8394) | 0.12<br>(1 in<br>840)  | 0.02<br>(1 in<br>5008) | 0.12<br>(1 in<br>832)  | 0.02<br>(1 in<br>4183) | 0.31<br>(1 in<br>318)  | 0.06<br>(1 in<br>1602) | 0.32<br>(1 in<br>317)  | 0.06<br>(1 in<br>1592) |
| <b>Low SDI</b>               | Tracheal,<br>bronchus,<br>and lung<br>cancer                        | 0.08<br>(1 in<br>1297)  | 0.04<br>(1 in<br>2324)  | 0.18<br>(1 in<br>548)  | 0.08<br>(1 in<br>1228) | 0.40<br>(1 in<br>249)  | 0.18<br>(1 in<br>544)  | 0.68<br>(1 in<br>148)  | 0.27<br>(1 in<br>365)  | 1.33<br>(1 in<br>75)   | 0.58<br>(1 in<br>173)  | 1.33<br>(1 in<br>75)   | 0.58<br>(1 in<br>172)  |
| <b>Low SDI</b>               | Malignant<br>skin<br>melanoma                                       | 0.01<br>(1 in<br>11122) | 0.01<br>(1 in<br>10030) | 0.01<br>(1 in<br>9260) | 0.02<br>(1 in<br>5841) | 0.03<br>(1 in<br>3801) | 0.04<br>(1 in<br>2769) | 0.04<br>(1 in<br>2797) | 0.04<br>(1 in<br>2850) | 0.08<br>(1 in<br>1237) | 0.10<br>(1 in<br>1032) | 0.08<br>(1 in<br>1222) | 0.10<br>(1 in<br>1018) |
| <b>Low SDI</b>               | Non-<br>melanoma<br>skin cancer<br>(squamous-<br>cell<br>carcinoma) | 0.02<br>(1 in<br>5534)  | 0.01<br>(1 in<br>10644) | 0.02<br>(1 in<br>4111) | 0.01<br>(1 in<br>8504) | 0.07<br>(1 in<br>1534) | 0.03<br>(1 in<br>3838) | 0.13<br>(1 in<br>757)  | 0.05<br>(1 in<br>2051) | 0.24<br>(1 in<br>424)  | 0.09<br>(1 in<br>1060) | 0.24<br>(1 in<br>418)  | 0.10<br>(1 in<br>1042) |
| <b>Low SDI</b>               | Non-<br>melanoma<br>skin cancer                                     | 0.08<br>(1 in<br>1209)  | 0.07<br>(1 in<br>1365)  | 0.10<br>(1 in<br>1012) | 0.08<br>(1 in<br>1282) | 0.15<br>(1 in<br>661)  | 0.11<br>(1 in<br>907)  | 0.21<br>(1 in<br>470)  | 0.14<br>(1 in<br>706)  | 0.53<br>(1 in<br>188)  | 0.39<br>(1 in<br>256)  | 0.54<br>(1 in<br>184)  | 0.40<br>(1 in<br>248)  |

| Location/<br>SDI<br>quintile | Cancer                 | Birth to age 49         |                        | Age 50 to 59            |                        | Age 60 to 69            |                        | Age 70 to 79            |                        | Age 30 to 70           |                       | Birth to age 79        |                       |
|------------------------------|------------------------|-------------------------|------------------------|-------------------------|------------------------|-------------------------|------------------------|-------------------------|------------------------|------------------------|-----------------------|------------------------|-----------------------|
|                              |                        | Male                    | Female                 | Male                    | Female                 | Male                    | Female                 | Male                    | Female                 | Male                   | Female                | Male                   | Female                |
|                              | (basal-cell carcinoma) |                         |                        |                         |                        |                         |                        |                         |                        |                        |                       |                        |                       |
| <b>Low SDI</b>               | Breast cancer          | 0.01<br>(1 in<br>16426) | 0.48<br>(1 in<br>210)  | 0.01<br>(1 in<br>13787) | 0.48<br>(1 in<br>210)  | 0.01<br>(1 in<br>6678)  | 0.55<br>(1 in<br>181)  | 0.02<br>(1 in<br>5509)  | 0.51<br>(1 in<br>196)  | 0.05<br>(1 in<br>2177) | 1.98<br>(1 in<br>51)  | 0.05<br>(1 in<br>2152) | 2.00<br>(1 in<br>50)  |
| <b>Low SDI</b>               | Cervical cancer        | NA                      | 1.04<br>(1 in<br>96)   | NA                      | 0.80<br>(1 in<br>124)  | NA                      | 0.87<br>(1 in<br>115)  | NA                      | 0.61<br>(1 in<br>163)  | NA                     | 3.23<br>(1 in<br>31)  | NA                     | 3.29<br>(1 in<br>30)  |
| <b>Low SDI</b>               | Uterine cancer         | NA                      | 0.04<br>(1 in<br>2471) | NA                      | 0.08<br>(1 in<br>1200) | NA                      | 0.15<br>(1 in<br>661)  | NA                      | 0.15<br>(1 in<br>660)  | NA                     | 0.42<br>(1 in<br>236) | NA                     | 0.43<br>(1 in<br>235) |
| <b>Low SDI</b>               | Ovarian cancer         | NA                      | 0.12<br>(1 in<br>853)  | NA                      | 0.14<br>(1 in<br>738)  | NA                      | 0.15<br>(1 in<br>650)  | NA                      | 0.18<br>(1 in<br>549)  | NA                     | 0.57<br>(1 in<br>175) | NA                     | 0.59<br>(1 in<br>170) |
| <b>Low SDI</b>               | Prostate cancer        | 0.03<br>(1 in<br>3858)  | NA                     | 0.17<br>(1 in<br>605)   | NA                     | 0.92<br>(1 in<br>109)   | NA                     | 2.08<br>(1 in<br>48)    | NA                     | 3.16<br>(1 in<br>32)   | NA                    | 3.16<br>(1 in<br>32)   | NA                    |
| <b>Low SDI</b>               | Testicular cancer      | 0.01<br>(1 in<br>9844)  | NA                     | 0.00<br>(1 in<br>33316) | NA                     | 0.00<br>(1 in<br>22247) | NA                     | 0.01<br>(1 in<br>16688) | NA                     | 0.02<br>(1 in<br>5007) | NA                    | 0.02<br>(1 in<br>4229) | NA                    |
| <b>Low SDI</b>               | Kidney cancer          | 0.03<br>(1 in<br>3890)  | 0.03<br>(1 in<br>3997) | 0.04<br>(1 in<br>2788)  | 0.03<br>(1 in<br>3740) | 0.05<br>(1 in<br>1925)  | 0.04<br>(1 in<br>2816) | 0.07<br>(1 in<br>1437)  | 0.04<br>(1 in<br>2681) | 0.18<br>(1 in<br>564)  | 0.12<br>(1 in<br>847) | 0.18<br>(1 in<br>547)  | 0.12<br>(1 in<br>803) |
| <b>Low SDI</b>               | Bladder cancer         | 0.03<br>(1 in<br>3864)  | 0.02<br>(1 in<br>6406) | 0.05<br>(1 in<br>2020)  | 0.03<br>(1 in<br>3135) | 0.13<br>(1 in<br>787)   | 0.07<br>(1 in<br>1453) | 0.26<br>(1 in<br>385)   | 0.10<br>(1 in<br>964)  | 0.46<br>(1 in<br>217)  | 0.22<br>(1 in<br>457) | 0.46<br>(1 in<br>217)  | 0.22<br>(1 in<br>455) |

| Location/<br>SDI<br>quintile | Cancer                          | Birth to age 49      |                      | Age 50 to 59         |                      | Age 60 to 69         |                      | Age 70 to 79        |                      | Age 30 to 70        |                     | Birth to age 79     |                     |
|------------------------------|---------------------------------|----------------------|----------------------|----------------------|----------------------|----------------------|----------------------|---------------------|----------------------|---------------------|---------------------|---------------------|---------------------|
|                              |                                 | Male                 | Female               | Male                 | Female               | Male                 | Female               | Male                | Female               | Male                | Female              | Male                | Female              |
| <b>Low SDI</b>               | Brain and nervous system cancer | 0.05<br>(1 in 1882)  | 0.04<br>(1 in 2336)  | 0.04<br>(1 in 2275)  | 0.03<br>(1 in 3223)  | 0.07<br>(1 in 1458)  | 0.05<br>(1 in 2116)  | 0.07<br>(1 in 1341) | 0.06<br>(1 in 1627)  | 0.22<br>(1 in 450)  | 0.17<br>(1 in 596)  | 0.24<br>(1 in 417)  | 0.18<br>(1 in 548)  |
| <b>Low SDI</b>               | Thyroid cancer                  | 0.01<br>(1 in 10628) | 0.03<br>(1 in 2934)  | 0.01<br>(1 in 7548)  | 0.04<br>(1 in 2651)  | 0.02<br>(1 in 4285)  | 0.04<br>(1 in 2306)  | 0.03<br>(1 in 3734) | 0.06<br>(1 in 1776)  | 0.07<br>(1 in 1409) | 0.17<br>(1 in 596)  | 0.07<br>(1 in 1374) | 0.17<br>(1 in 584)  |
| <b>Low SDI</b>               | Mesothelioma                    | 0.00<br>(1 in 28725) | 0.00<br>(1 in 22394) | 0.01<br>(1 in 15857) | 0.00<br>(1 in 21367) | 0.01<br>(1 in 9895)  | 0.01<br>(1 in 14591) | 0.02<br>(1 in 5851) | 0.01<br>(1 in 12092) | 0.04<br>(1 in 2734) | 0.02<br>(1 in 4203) | 0.04<br>(1 in 2704) | 0.02<br>(1 in 4121) |
| <b>Low SDI</b>               | Hodgkin lymphoma                | 0.03<br>(1 in 3524)  | 0.02<br>(1 in 5466)  | 0.01<br>(1 in 7369)  | 0.01<br>(1 in 11450) | 0.02<br>(1 in 4897)  | 0.02<br>(1 in 6589)  | 0.02<br>(1 in 4693) | 0.01<br>(1 in 8192)  | 0.07<br>(1 in 1376) | 0.05<br>(1 in 2101) | 0.08<br>(1 in 1195) | 0.05<br>(1 in 1838) |
| <b>Low SDI</b>               | Non-Hodgkin lymphoma            | 0.12<br>(1 in 856)   | 0.09<br>(1 in 1170)  | 0.07<br>(1 in 1510)  | 0.05<br>(1 in 2143)  | 0.11<br>(1 in 913)   | 0.09<br>(1 in 1120)  | 0.13<br>(1 in 777)  | 0.10<br>(1 in 984)   | 0.37<br>(1 in 267)  | 0.29<br>(1 in 343)  | 0.42<br>(1 in 238)  | 0.32<br>(1 in 310)  |
| <b>Low SDI</b>               | Multiple myeloma                | 0.01<br>(1 in 8332)  | 0.01<br>(1 in 6947)  | 0.02<br>(1 in 5356)  | 0.03<br>(1 in 3582)  | 0.05<br>(1 in 2108)  | 0.07<br>(1 in 1497)  | 0.07<br>(1 in 1536) | 0.05<br>(1 in 1910)  | 0.14<br>(1 in 703)  | 0.16<br>(1 in 624)  | 0.14<br>(1 in 699)  | 0.16<br>(1 in 620)  |
| <b>Low SDI</b>               | Leukemia                        | 0.08<br>(1 in 1311)  | 0.07<br>(1 in 1530)  | 0.05<br>(1 in 2173)  | 0.04<br>(1 in 2289)  | 0.09<br>(1 in 1136)  | 0.07<br>(1 in 1406)  | 0.13<br>(1 in 762)  | 0.11<br>(1 in 946)   | 0.31<br>(1 in 326)  | 0.26<br>(1 in 387)  | 0.34<br>(1 in 293)  | 0.29<br>(1 in 350)  |
| <b>Low SDI</b>               | Acute lymphoid leukemia         | 0.02<br>(1 in 6033)  | 0.01<br>(1 in 8391)  | 0.01<br>(1 in 13249) | 0.00<br>(1 in 20382) | 0.01<br>(1 in 11518) | 0.01<br>(1 in 14516) | 0.01<br>(1 in 9171) | 0.01<br>(1 in 18208) | 0.03<br>(1 in 3011) | 0.02<br>(1 in 4625) | 0.04<br>(1 in 2288) | 0.03<br>(1 in 3425) |

| Location/<br>SDI<br>quintile | Cancer                     | Birth to age 49      |                      | Age 50 to 59         |                      | Age 60 to 69        |                      | Age 70 to 79        |                     | Age 30 to 70        |                     | Birth to age 79     |                     |
|------------------------------|----------------------------|----------------------|----------------------|----------------------|----------------------|---------------------|----------------------|---------------------|---------------------|---------------------|---------------------|---------------------|---------------------|
|                              |                            | Male                 | Female               | Male                 | Female               | Male                | Female               | Male                | Female              | Male                | Female              | Male                | Female              |
| <b>Low SDI</b>               | Chronic lymphoid leukemia  | 0.00<br>(1 in 56848) | 0.00<br>(1 in 20048) | 0.00<br>(1 in 20469) | 0.01<br>(1 in 15700) | 0.02<br>(1 in 5989) | 0.02<br>(1 in 4295)  | 0.02<br>(1 in 4107) | 0.03<br>(1 in 3669) | 0.05<br>(1 in 2123) | 0.06<br>(1 in 1641) | 0.05<br>(1 in 2097) | 0.06<br>(1 in 1616) |
| <b>Low SDI</b>               | Acute myeloid leukemia     | 0.02<br>(1 in 5444)  | 0.01<br>(1 in 7176)  | 0.01<br>(1 in 8942)  | 0.01<br>(1 in 16332) | 0.02<br>(1 in 5274) | 0.01<br>(1 in 12839) | 0.02<br>(1 in 5419) | 0.02<br>(1 in 6245) | 0.06<br>(1 in 1698) | 0.04<br>(1 in 2699) | 0.07<br>(1 in 1494) | 0.04<br>(1 in 2280) |
| <b>Low SDI</b>               | Chronic myeloid leukemia   | 0.01<br>(1 in 8098)  | 0.01<br>(1 in 8162)  | 0.01<br>(1 in 15804) | 0.01<br>(1 in 11920) | 0.01<br>(1 in 8582) | 0.01<br>(1 in 10857) | 0.01<br>(1 in 8395) | 0.01<br>(1 in 7493) | 0.04<br>(1 in 2598) | 0.04<br>(1 in 2458) | 0.04<br>(1 in 2368) | 0.04<br>(1 in 2315) |
| <b>Low SDI</b>               | Other leukemia             | 0.03<br>(1 in 3674)  | 0.02<br>(1 in 4491)  | 0.02<br>(1 in 6219)  | 0.02<br>(1 in 5585)  | 0.03<br>(1 in 3122) | 0.02<br>(1 in 4173)  | 0.07<br>(1 in 1524) | 0.04<br>(1 in 2292) | 0.13<br>(1 in 775)  | 0.10<br>(1 in 1015) | 0.14<br>(1 in 710)  | 0.11<br>(1 in 928)  |
| <b>Low SDI</b>               | Other neoplasms            | 0.26<br>(1 in 378)   | 0.19<br>(1 in 518)   | 0.14<br>(1 in 706)   | 0.11<br>(1 in 934)   | 0.21<br>(1 in 481)  | 0.15<br>(1 in 646)   | 0.31<br>(1 in 327)  | 0.20<br>(1 in 488)  | 0.85<br>(1 in 118)  | 0.60<br>(1 in 166)  | 0.92<br>(1 in 109)  | 0.66<br>(1 in 152)  |
| <b>Middle SDI</b>            | Neoplasms                  | 2.46<br>(1 in 41)    | 3.13<br>(1 in 32)    | 4.06<br>(1 in 25)    | 3.34<br>(1 in 30)    | 9.17<br>(1 in 11)   | 5.21<br>(1 in 19)    | 14.35<br>(1 in 7)   | 7.18<br>(1 in 14)   | 26.88<br>(1 in 4)   | 17.25<br>(1 in 6)   | 27.20<br>(1 in 4)   | 17.62<br>(1 in 6)   |
| <b>Middle SDI</b>            | Lip and oral cavity cancer | 0.08<br>(1 in 1261)  | 0.05<br>(1 in 2165)  | 0.13<br>(1 in 788)   | 0.05<br>(1 in 1820)  | 0.21<br>(1 in 475)  | 0.09<br>(1 in 1062)  | 0.30<br>(1 in 328)  | 0.15<br>(1 in 681)  | 0.71<br>(1 in 140)  | 0.34<br>(1 in 298)  | 0.72<br>(1 in 139)  | 0.34<br>(1 in 293)  |
| <b>Middle SDI</b>            | Nasopharynx cancer         | 0.08<br>(1 in 1304)  | 0.03<br>(1 in 3066)  | 0.05<br>(1 in 2211)  | 0.02<br>(1 in 6349)  | 0.07<br>(1 in 1520) | 0.02<br>(1 in 5007)  | 0.07<br>(1 in 1479) | 0.02<br>(1 in 4323) | 0.24<br>(1 in 413)  | 0.09<br>(1 in 1161) | 0.26<br>(1 in 392)  | 0.09<br>(1 in 1094) |
| <b>Middle SDI</b>            | Other pharynx cancer       | 0.03<br>(1 in 3710)  | 0.01<br>(1 in 10236) | 0.06<br>(1 in 1578)  | 0.02<br>(1 in 6270)  | 0.09<br>(1 in 1118) | 0.02<br>(1 in 4317)  | 0.09<br>(1 in 1067) | 0.03<br>(1 in 3906) | 0.27<br>(1 in 367)  | 0.07<br>(1 in 1363) | 0.27<br>(1 in 366)  | 0.07<br>(1 in 1343) |

| Location/<br>SDI<br>quintile | Cancer                               | Birth to age 49     |                      | Age 50 to 59        |                     | Age 60 to 69        |                     | Age 70 to 79       |                     | Age 30 to 70       |                     | Birth to age 79    |                     |
|------------------------------|--------------------------------------|---------------------|----------------------|---------------------|---------------------|---------------------|---------------------|--------------------|---------------------|--------------------|---------------------|--------------------|---------------------|
|                              |                                      | Male                | Female               | Male                | Female              | Male                | Female              | Male               | Female              | Male               | Female              | Male               | Female              |
| <b>Middle SDI</b>            | Esophageal cancer                    | 0.07<br>(1 in 1490) | 0.03<br>(1 in 3622)  | 0.22<br>(1 in 447)  | 0.07<br>(1 in 1473) | 0.62<br>(1 in 161)  | 0.21<br>(1 in 486)  | 0.94<br>(1 in 107) | 0.34<br>(1 in 292)  | 1.84<br>(1 in 54)  | 0.64<br>(1 in 156)  | 1.84<br>(1 in 54)  | 0.64<br>(1 in 156)  |
| <b>Middle SDI</b>            | Stomach cancer                       | 0.19<br>(1 in 524)  | 0.11<br>(1 in 917)   | 0.50<br>(1 in 200)  | 0.18<br>(1 in 553)  | 1.36<br>(1 in 73)   | 0.42<br>(1 in 236)  | 2.13<br>(1 in 47)  | 0.73<br>(1 in 136)  | 4.12<br>(1 in 24)  | 1.43<br>(1 in 70)   | 4.13<br>(1 in 24)  | 1.44<br>(1 in 69)   |
| <b>Middle SDI</b>            | Colon and rectum cancer              | 0.20<br>(1 in 491)  | 0.15<br>(1 in 659)   | 0.36<br>(1 in 276)  | 0.26<br>(1 in 386)  | 0.88<br>(1 in 113)  | 0.54<br>(1 in 185)  | 1.47<br>(1 in 68)  | 0.92<br>(1 in 109)  | 2.88<br>(1 in 35)  | 1.85<br>(1 in 54)   | 2.90<br>(1 in 35)  | 1.86<br>(1 in 54)   |
| <b>Middle SDI</b>            | Liver cancer                         | 0.48<br>(1 in 208)  | 0.11<br>(1 in 904)   | 0.76<br>(1 in 131)  | 0.20<br>(1 in 509)  | 1.25<br>(1 in 80)   | 0.41<br>(1 in 243)  | 1.48<br>(1 in 68)  | 0.60<br>(1 in 167)  | 3.89<br>(1 in 26)  | 1.30<br>(1 in 77)   | 3.92<br>(1 in 26)  | 1.31<br>(1 in 76)   |
| <b>Middle SDI</b>            | Gallbladder and biliary tract cancer | 0.01<br>(1 in 7843) | 0.02<br>(1 in 5801)  | 0.03<br>(1 in 3598) | 0.03<br>(1 in 2867) | 0.07<br>(1 in 1489) | 0.08<br>(1 in 1234) | 0.13<br>(1 in 777) | 0.14<br>(1 in 719)  | 0.24<br>(1 in 425) | 0.27<br>(1 in 369)  | 0.24<br>(1 in 423) | 0.27<br>(1 in 368)  |
| <b>Middle SDI</b>            | Pancreatic cancer                    | 0.04<br>(1 in 2717) | 0.02<br>(1 in 4539)  | 0.08<br>(1 in 1207) | 0.05<br>(1 in 1837) | 0.19<br>(1 in 513)  | 0.13<br>(1 in 748)  | 0.31<br>(1 in 324) | 0.24<br>(1 in 421)  | 0.62<br>(1 in 161) | 0.45<br>(1 in 224)  | 0.62<br>(1 in 161) | 0.45<br>(1 in 224)  |
| <b>Middle SDI</b>            | Larynx cancer                        | 0.03<br>(1 in 3604) | 0.01<br>(1 in 17124) | 0.09<br>(1 in 1145) | 0.01<br>(1 in 9074) | 0.18<br>(1 in 570)  | 0.02<br>(1 in 4445) | 0.23<br>(1 in 437) | 0.03<br>(1 in 2878) | 0.52<br>(1 in 193) | 0.07<br>(1 in 1363) | 0.52<br>(1 in 193) | 0.07<br>(1 in 1350) |
| <b>Middle SDI</b>            | Tracheal, bronchus, and lung cancer  | 0.23<br>(1 in 438)  | 0.12<br>(1 in 804)   | 0.70<br>(1 in 143)  | 0.27<br>(1 in 368)  | 1.98<br>(1 in 50)   | 0.66<br>(1 in 151)  | 3.32<br>(1 in 30)  | 1.11<br>(1 in 90)   | 6.10<br>(1 in 16)  | 2.14<br>(1 in 47)   | 6.11<br>(1 in 16)  | 2.15<br>(1 in 46)   |

| Location/<br>SDI<br>quintile | Cancer                                             | Birth to age 49      |                     | Age 50 to 59        |                     | Age 60 to 69        |                     | Age 70 to 79        |                     | Age 30 to 70        |                     | Birth to age 79     |                     |
|------------------------------|----------------------------------------------------|----------------------|---------------------|---------------------|---------------------|---------------------|---------------------|---------------------|---------------------|---------------------|---------------------|---------------------|---------------------|
|                              |                                                    | Male                 | Female              | Male                | Female              | Male                | Female              | Male                | Female              | Male                | Female              | Male                | Female              |
| <b>Middle SDI</b>            | Malignant skin melanoma                            | 0.02<br>(1 in 4734)  | 0.02<br>(1 in 5399) | 0.02<br>(1 in 5136) | 0.01<br>(1 in 7787) | 0.02<br>(1 in 4792) | 0.02<br>(1 in 5367) | 0.03<br>(1 in 3177) | 0.03<br>(1 in 3306) | 0.09<br>(1 in 1122) | 0.08<br>(1 in 1323) | 0.09<br>(1 in 1076) | 0.08<br>(1 in 1246) |
| <b>Middle SDI</b>            | Non-melanoma skin cancer (squamous-cell carcinoma) | 0.02<br>(1 in 4317)  | 0.02<br>(1 in 4629) | 0.06<br>(1 in 1604) | 0.03<br>(1 in 3052) | 0.23<br>(1 in 444)  | 0.08<br>(1 in 1221) | 0.51<br>(1 in 197)  | 0.17<br>(1 in 587)  | 0.81<br>(1 in 123)  | 0.30<br>(1 in 329)  | 0.82<br>(1 in 123)  | 0.31<br>(1 in 326)  |
| <b>Middle SDI</b>            | Non-melanoma skin cancer (basal-cell carcinoma)    | 0.11<br>(1 in 944)   | 0.12<br>(1 in 801)  | 0.17<br>(1 in 602)  | 0.16<br>(1 in 620)  | 0.34<br>(1 in 292)  | 0.27<br>(1 in 372)  | 0.59<br>(1 in 169)  | 0.42<br>(1 in 239)  | 1.19<br>(1 in 84)   | 0.96<br>(1 in 105)  | 1.20<br>(1 in 83)   | 0.97<br>(1 in 103)  |
| <b>Middle SDI</b>            | Breast cancer                                      | 0.01<br>(1 in 15063) | 0.89<br>(1 in 112)  | 0.01<br>(1 in 8447) | 0.88<br>(1 in 113)  | 0.02<br>(1 in 4106) | 0.94<br>(1 in 107)  | 0.02<br>(1 in 4089) | 0.89<br>(1 in 112)  | 0.07<br>(1 in 1501) | 3.51<br>(1 in 28)   | 0.07<br>(1 in 1486) | 3.56<br>(1 in 28)   |
| <b>Middle SDI</b>            | Cervical cancer                                    | NA                   | 0.48<br>(1 in 209)  | NA                  | 0.34<br>(1 in 295)  | NA                  | 0.33<br>(1 in 306)  | NA                  | 0.28<br>(1 in 351)  | NA                  | 1.39<br>(1 in 72)   | NA                  | 1.42<br>(1 in 70)   |
| <b>Middle SDI</b>            | Uterine cancer                                     | NA                   | 0.13<br>(1 in 764)  | NA                  | 0.22<br>(1 in 461)  | NA                  | 0.23<br>(1 in 442)  | NA                  | 0.19<br>(1 in 532)  | NA                  | 0.75<br>(1 in 133)  | NA                  | 0.76<br>(1 in 132)  |
| <b>Middle SDI</b>            | Ovarian cancer                                     | NA                   | 0.14<br>(1 in 694)  | NA                  | 0.13<br>(1 in 783)  | NA                  | 0.15<br>(1 in 680)  | NA                  | 0.15<br>(1 in 648)  | NA                  | 0.54<br>(1 in 184)  | NA                  | 0.57<br>(1 in 175)  |



| Location/<br>SDI<br>quintile | Cancer                          | Birth to age 49      |                      | Age 50 to 59         |                      | Age 60 to 69         |                      | Age 70 to 79        |                      | Age 30 to 70        |                     | Birth to age 79     |                     |
|------------------------------|---------------------------------|----------------------|----------------------|----------------------|----------------------|----------------------|----------------------|---------------------|----------------------|---------------------|---------------------|---------------------|---------------------|
|                              |                                 | Male                 | Female               | Male                 | Female               | Male                 | Female               | Male                | Female               | Male                | Female              | Male                | Female              |
| <b>Middle SDI</b>            | Prostate cancer                 | 0.04<br>(1 in 2366)  | NA                   | 0.20<br>(1 in 501)   | NA                   | 0.83<br>(1 in 120)   | NA                   | 1.90<br>(1 in 53)   | NA                   | 2.94<br>(1 in 34)   | NA                  | 2.95<br>(1 in 34)   | NA                  |
| <b>Middle SDI</b>            | Testicular cancer               | 0.05<br>(1 in 1942)  | NA                   | 0.01<br>(1 in 16097) | NA                   | 0.01<br>(1 in 11812) | NA                   | 0.01<br>(1 in 7482) | NA                   | 0.05<br>(1 in 1892) | NA                  | 0.08<br>(1 in 1258) | NA                  |
| <b>Middle SDI</b>            | Kidney cancer                   | 0.06<br>(1 in 1611)  | 0.05<br>(1 in 2070)  | 0.08<br>(1 in 1235)  | 0.04<br>(1 in 2467)  | 0.12<br>(1 in 832)   | 0.07<br>(1 in 1479)  | 0.18<br>(1 in 563)  | 0.09<br>(1 in 1127)  | 0.43<br>(1 in 233)  | 0.23<br>(1 in 434)  | 0.44<br>(1 in 227)  | 0.24<br>(1 in 408)  |
| <b>Middle SDI</b>            | Bladder cancer                  | 0.05<br>(1 in 1885)  | 0.02<br>(1 in 5801)  | 0.10<br>(1 in 1034)  | 0.03<br>(1 in 3640)  | 0.24<br>(1 in 422)   | 0.05<br>(1 in 1855)  | 0.43<br>(1 in 232)  | 0.11<br>(1 in 927)   | 0.81<br>(1 in 123)  | 0.20<br>(1 in 490)  | 0.82<br>(1 in 122)  | 0.21<br>(1 in 485)  |
| <b>Middle SDI</b>            | Brain and nervous system cancer | 0.14<br>(1 in 729)   | 0.13<br>(1 in 763)   | 0.08<br>(1 in 1270)  | 0.07<br>(1 in 1497)  | 0.13<br>(1 in 750)   | 0.10<br>(1 in 981)   | 0.16<br>(1 in 617)  | 0.12<br>(1 in 805)   | 0.46<br>(1 in 219)  | 0.37<br>(1 in 271)  | 0.51<br>(1 in 196)  | 0.42<br>(1 in 236)  |
| <b>Middle SDI</b>            | Thyroid cancer                  | 0.05<br>(1 in 2138)  | 0.11<br>(1 in 884)   | 0.04<br>(1 in 2350)  | 0.07<br>(1 in 1430)  | 0.03<br>(1 in 3040)  | 0.07<br>(1 in 1378)  | 0.05<br>(1 in 1901) | 0.07<br>(1 in 1489)  | 0.17<br>(1 in 604)  | 0.30<br>(1 in 328)  | 0.17<br>(1 in 572)  | 0.32<br>(1 in 310)  |
| <b>Middle SDI</b>            | Mesothelioma                    | 0.01<br>(1 in 18184) | 0.00<br>(1 in 27415) | 0.01<br>(1 in 10448) | 0.00<br>(1 in 27486) | 0.01<br>(1 in 11013) | 0.01<br>(1 in 14209) | 0.02<br>(1 in 6495) | 0.01<br>(1 in 10076) | 0.04<br>(1 in 2579) | 0.02<br>(1 in 4257) | 0.04<br>(1 in 2529) | 0.02<br>(1 in 4124) |
| <b>Middle SDI</b>            | Hodgkin lymphoma                | 0.02<br>(1 in 4282)  | 0.01<br>(1 in 7342)  | 0.01<br>(1 in 8087)  | 0.00<br>(1 in 22076) | 0.02<br>(1 in 5178)  | 0.01<br>(1 in 15519) | 0.02<br>(1 in 5002) | 0.01<br>(1 in 11877) | 0.06<br>(1 in 1575) | 0.03<br>(1 in 3890) | 0.08<br>(1 in 1333) | 0.03<br>(1 in 3029) |

| Location/<br>SDI<br>quintile | Cancer                          | Birth to age 49         |                         | Age 50 to 59            |                         | Age 60 to 69            |                         | Age 70 to 79           |                         | Age 30 to 70           |                        | Birth to age 79        |                        |
|------------------------------|---------------------------------|-------------------------|-------------------------|-------------------------|-------------------------|-------------------------|-------------------------|------------------------|-------------------------|------------------------|------------------------|------------------------|------------------------|
|                              |                                 | Male                    | Female                  | Male                    | Female                  | Male                    | Female                  | Male                   | Female                  | Male                   | Female                 | Male                   | Female                 |
| <b>Middle<br/>SDI</b>        | Non-Hodgkin<br>lymphoma         | 0.09<br>(1 in<br>1114)  | 0.06<br>(1 in<br>1810)  | 0.09<br>(1 in<br>1100)  | 0.05<br>(1 in<br>2036)  | 0.15<br>(1 in<br>686)   | 0.09<br>(1 in<br>1156)  | 0.19<br>(1 in<br>527)  | 0.12<br>(1 in<br>855)   | 0.49<br>(1 in<br>205)  | 0.29<br>(1 in<br>344)  | 0.52<br>(1 in<br>194)  | 0.31<br>(1 in<br>325)  |
| <b>Middle<br/>SDI</b>        | Multiple<br>myeloma             | 0.01<br>(1 in<br>7487)  | 0.01<br>(1 in<br>11106) | 0.03<br>(1 in<br>3957)  | 0.02<br>(1 in<br>5366)  | 0.05<br>(1 in<br>2103)  | 0.04<br>(1 in<br>2776)  | 0.07<br>(1 in<br>1473) | 0.05<br>(1 in<br>2049)  | 0.15<br>(1 in<br>658)  | 0.11<br>(1 in<br>901)  | 0.15<br>(1 in<br>649)  | 0.11<br>(1 in<br>890)  |
| <b>Middle<br/>SDI</b>        | Leukemia                        | 0.16<br>(1 in<br>619)   | 0.12<br>(1 in<br>817)   | 0.08<br>(1 in<br>1195)  | 0.05<br>(1 in<br>1851)  | 0.15<br>(1 in<br>681)   | 0.08<br>(1 in<br>1189)  | 0.21<br>(1 in<br>482)  | 0.11<br>(1 in<br>883)   | 0.51<br>(1 in<br>195)  | 0.31<br>(1 in<br>327)  | 0.60<br>(1 in<br>167)  | 0.37<br>(1 in<br>268)  |
| <b>Middle<br/>SDI</b>        | Acute<br>lymphoid<br>leukemia   | 0.04<br>(1 in<br>2411)  | 0.03<br>(1 in<br>3500)  | 0.01<br>(1 in<br>8094)  | 0.01<br>(1 in<br>12800) | 0.02<br>(1 in<br>4945)  | 0.01<br>(1 in<br>9063)  | 0.03<br>(1 in<br>3730) | 0.01<br>(1 in<br>7074)  | 0.07<br>(1 in<br>1368) | 0.04<br>(1 in<br>2423) | 0.10<br>(1 in<br>992)  | 0.06<br>(1 in<br>1625) |
| <b>Middle<br/>SDI</b>        | Chronic<br>lymphoid<br>leukemia | 0.02<br>(1 in<br>6260)  | 0.01<br>(1 in<br>6973)  | 0.02<br>(1 in<br>6286)  | 0.01<br>(1 in<br>8513)  | 0.03<br>(1 in<br>3457)  | 0.02<br>(1 in<br>5413)  | 0.04<br>(1 in<br>2519) | 0.02<br>(1 in<br>4293)  | 0.10<br>(1 in<br>1048) | 0.06<br>(1 in<br>1562) | 0.10<br>(1 in<br>995)  | 0.07<br>(1 in<br>1474) |
| <b>Middle<br/>SDI</b>        | Acute<br>myeloid<br>leukemia    | 0.03<br>(1 in<br>3492)  | 0.02<br>(1 in<br>4592)  | 0.01<br>(1 in<br>7422)  | 0.01<br>(1 in<br>12542) | 0.02<br>(1 in<br>5106)  | 0.01<br>(1 in<br>8893)  | 0.03<br>(1 in<br>3624) | 0.02<br>(1 in<br>6063)  | 0.07<br>(1 in<br>1343) | 0.05<br>(1 in<br>2186) | 0.09<br>(1 in<br>1120) | 0.06<br>(1 in<br>1740) |
| <b>Middle<br/>SDI</b>        | Chronic<br>myeloid<br>leukemia  | 0.01<br>(1 in<br>10822) | 0.01<br>(1 in<br>17210) | 0.01<br>(1 in<br>16172) | 0.00<br>(1 in<br>26184) | 0.01<br>(1 in<br>14588) | 0.00<br>(1 in<br>23024) | 0.01<br>(1 in<br>9392) | 0.01<br>(1 in<br>17703) | 0.03<br>(1 in<br>3277) | 0.02<br>(1 in<br>5626) | 0.03<br>(1 in<br>3037) | 0.02<br>(1 in<br>5097) |
| <b>Middle<br/>SDI</b>        | Other<br>leukemia               | 0.07<br>(1 in<br>1505)  | 0.05<br>(1 in<br>1925)  | 0.04<br>(1 in<br>2793)  | 0.02<br>(1 in<br>4410)  | 0.07<br>(1 in<br>1404)  | 0.04<br>(1 in<br>2561)  | 0.10<br>(1 in<br>974)  | 0.05<br>(1 in<br>1863)  | 0.24<br>(1 in<br>414)  | 0.14<br>(1 in<br>727)  | 0.28<br>(1 in<br>362)  | 0.17<br>(1 in<br>598)  |
| <b>Middle<br/>SDI</b>        | Other<br>neoplasms              | 0.21<br>(1 in<br>469)   | 0.20<br>(1 in<br>508)   | 0.17<br>(1 in<br>595)   | 0.12<br>(1 in<br>804)   | 0.32<br>(1 in<br>316)   | 0.20<br>(1 in<br>511)   | 0.50<br>(1 in<br>199)  | 0.30<br>(1 in<br>333)   | 1.12<br>(1 in<br>89)   | 0.74<br>(1 in<br>135)  | 1.20<br>(1 in<br>84)   | 0.81<br>(1 in<br>123)  |

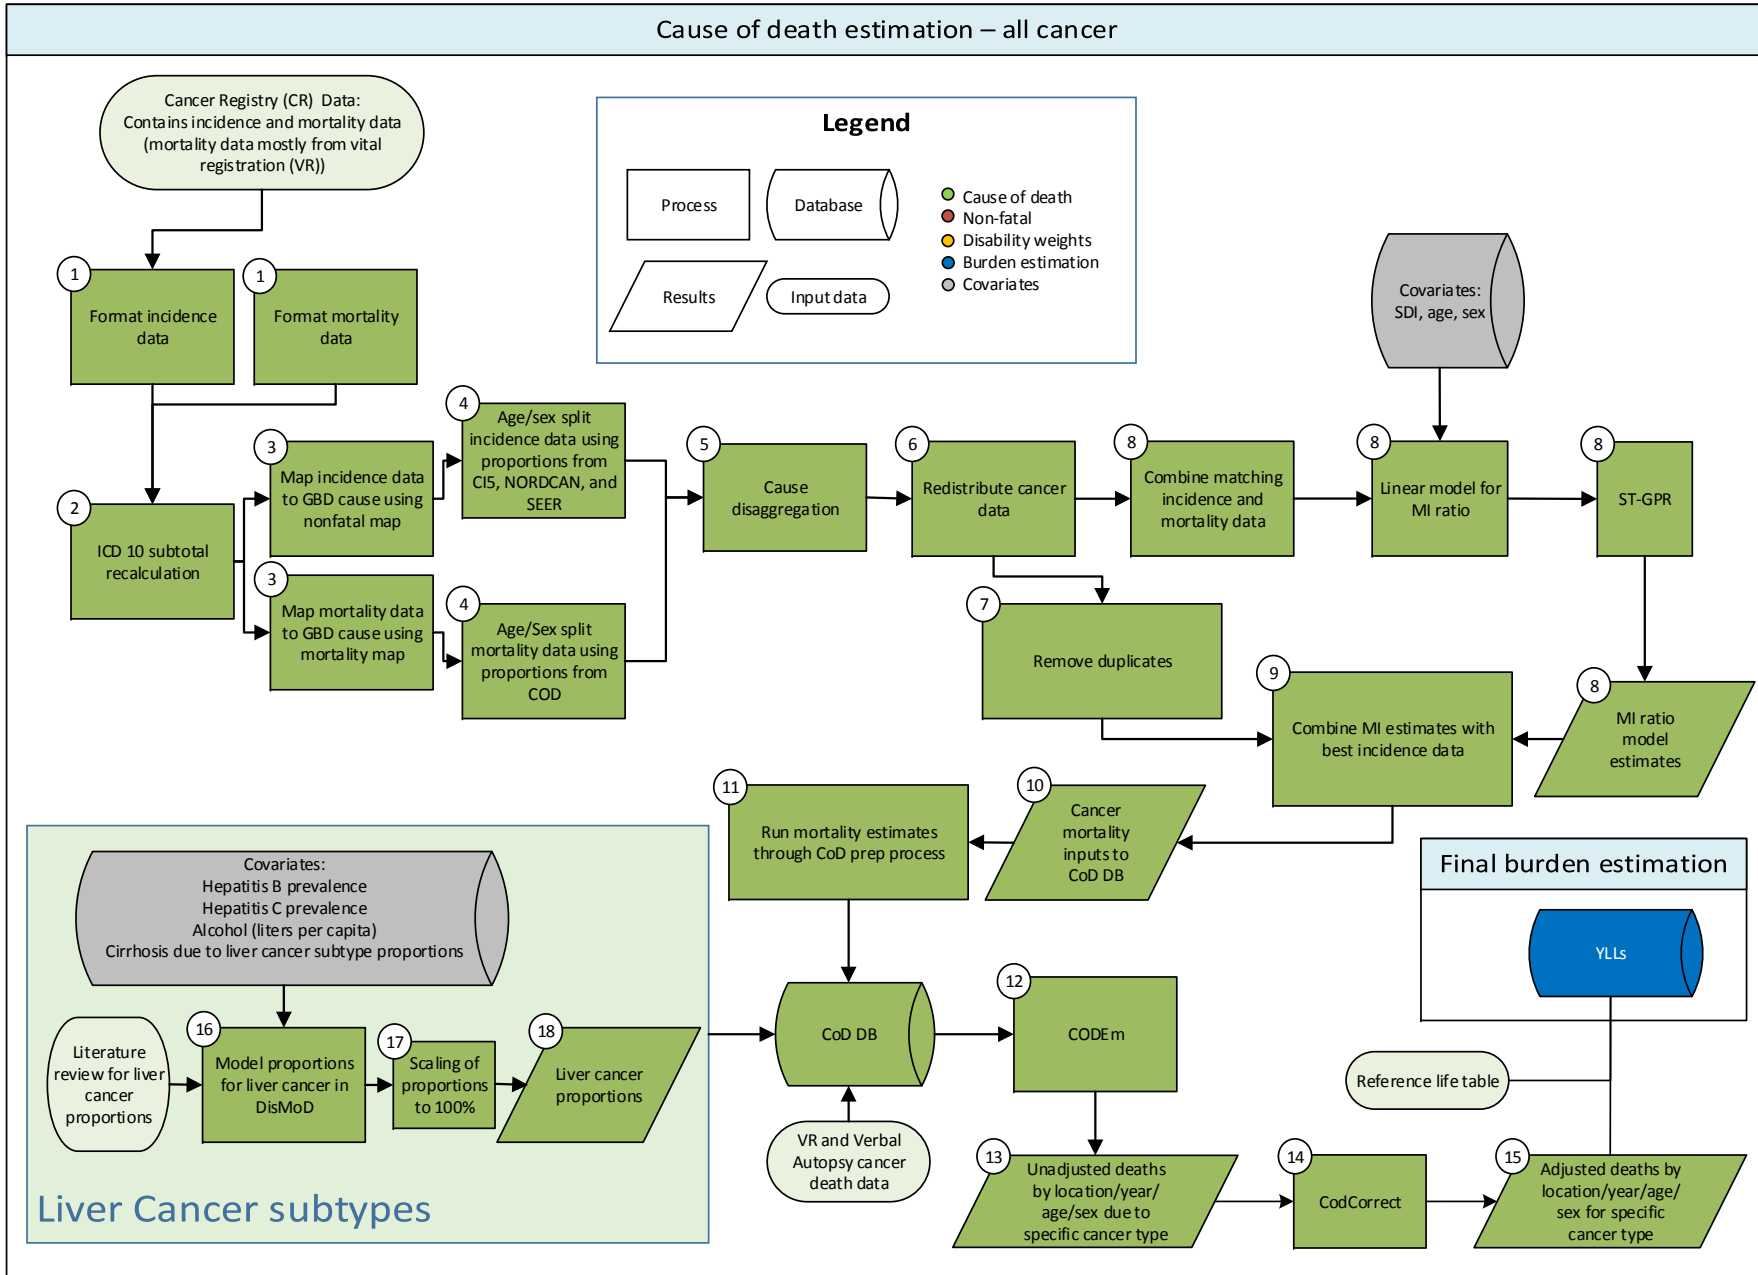

eFigure 1: Flowchart GBD cancer mortality, YLL estimation © 2018 Fitzmaurice C et al. JAMA Oncology.

## Incidence, prevalence, YLD estimation - cancer

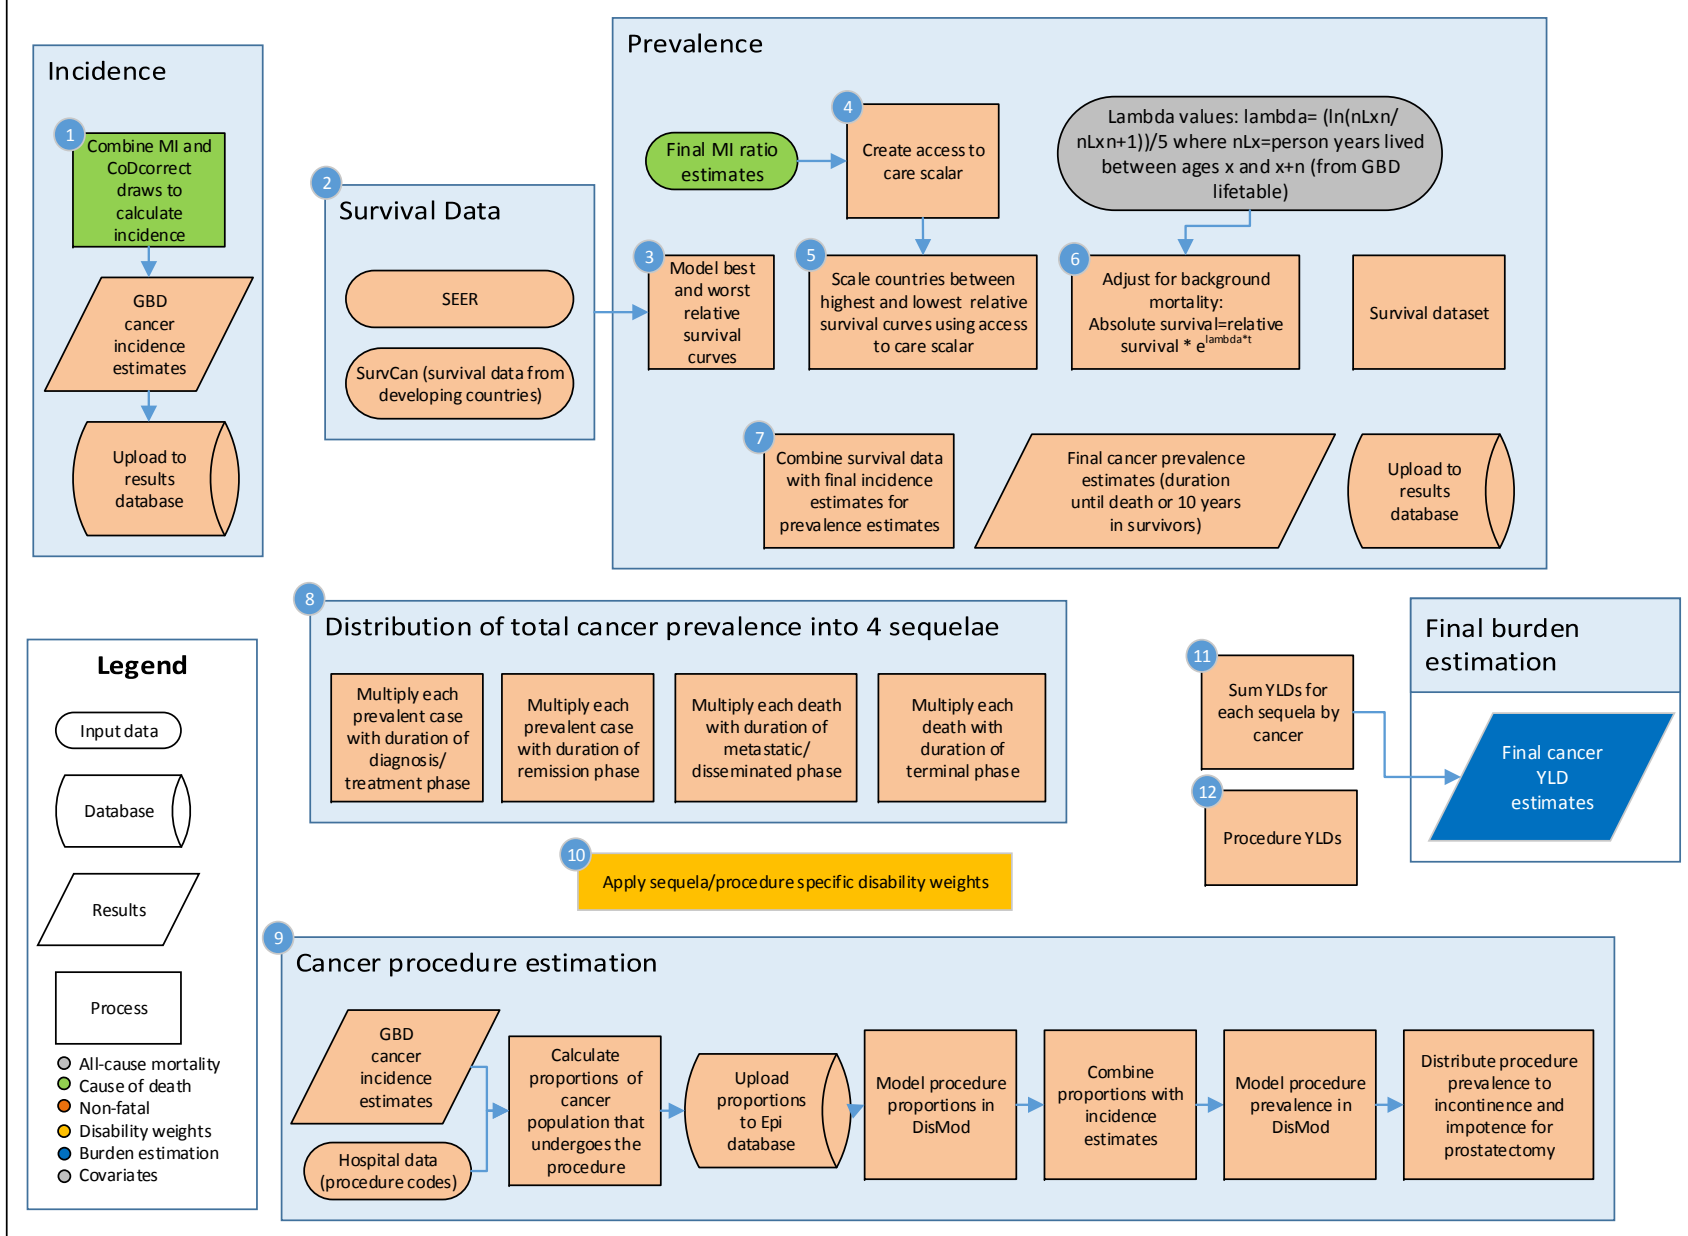

Figure 2: Flowchart GBD cancer incidence, prevalence, YLD estimation  
 © 2018 Fitzmaurice C et al. JAMA Oncology.

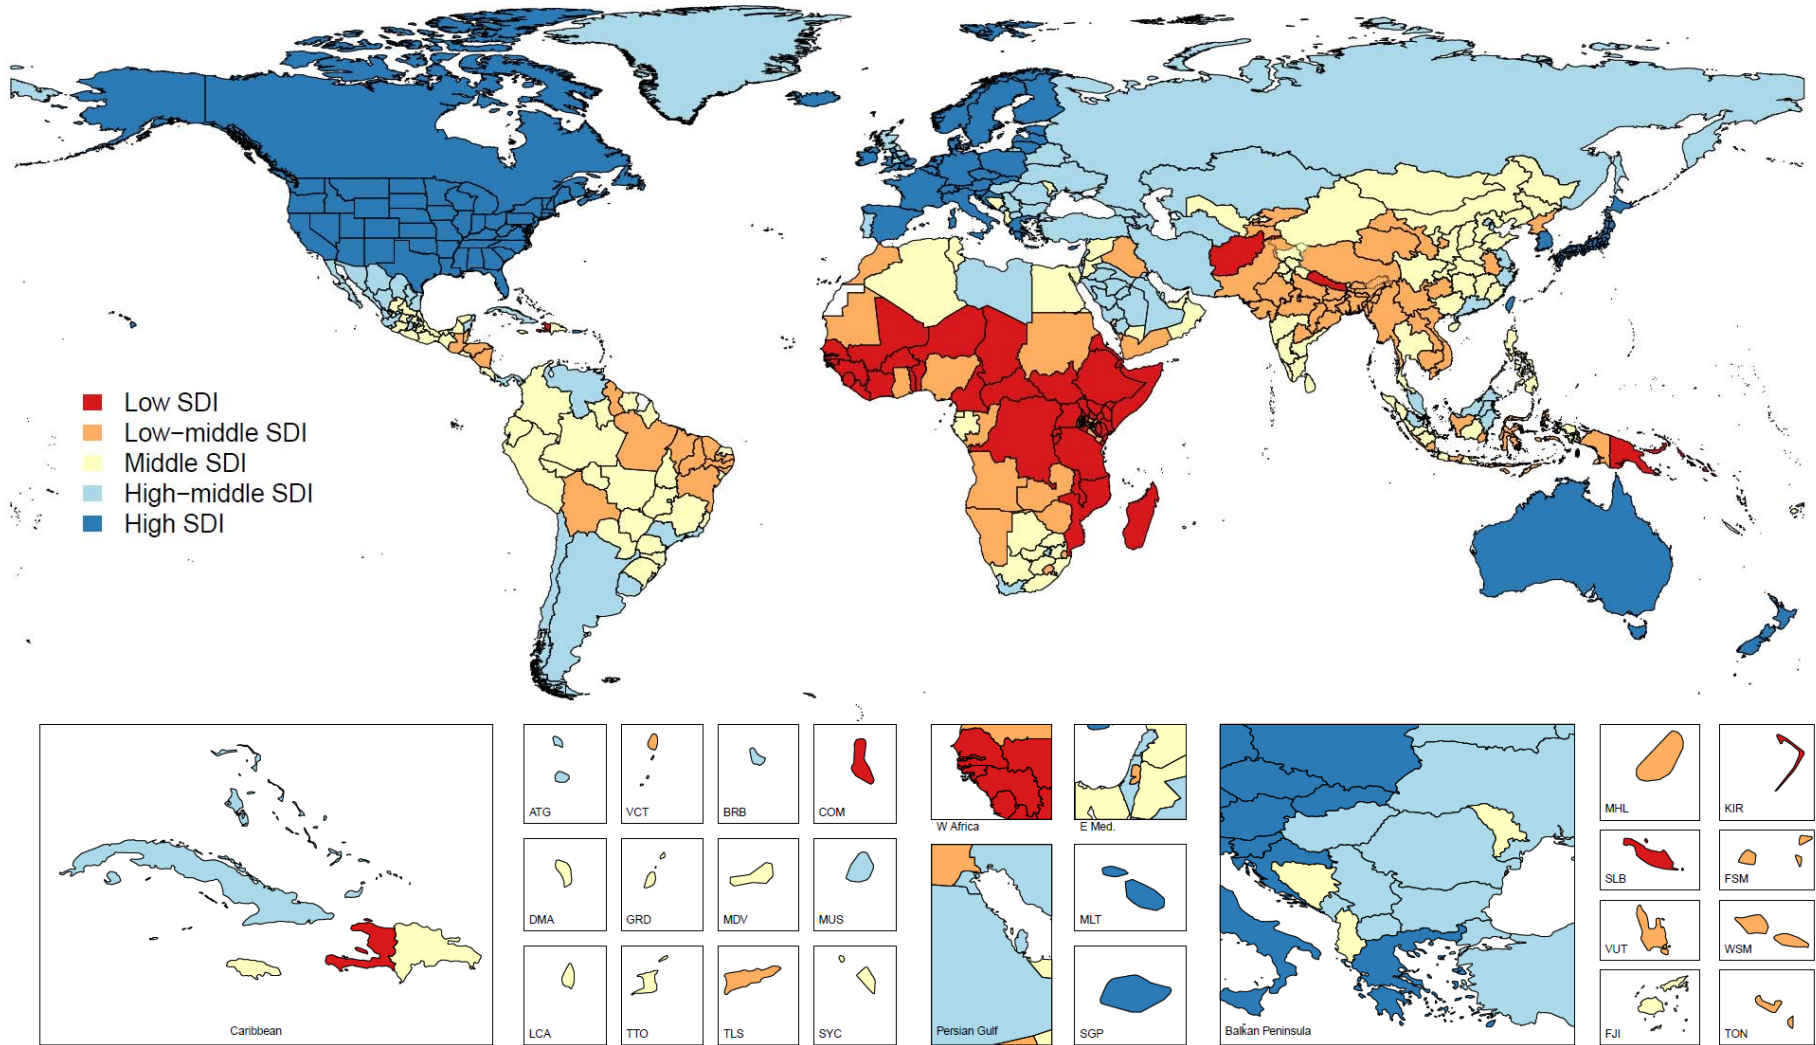

eFigure 3: Sociodemographic Index quintiles, 2016

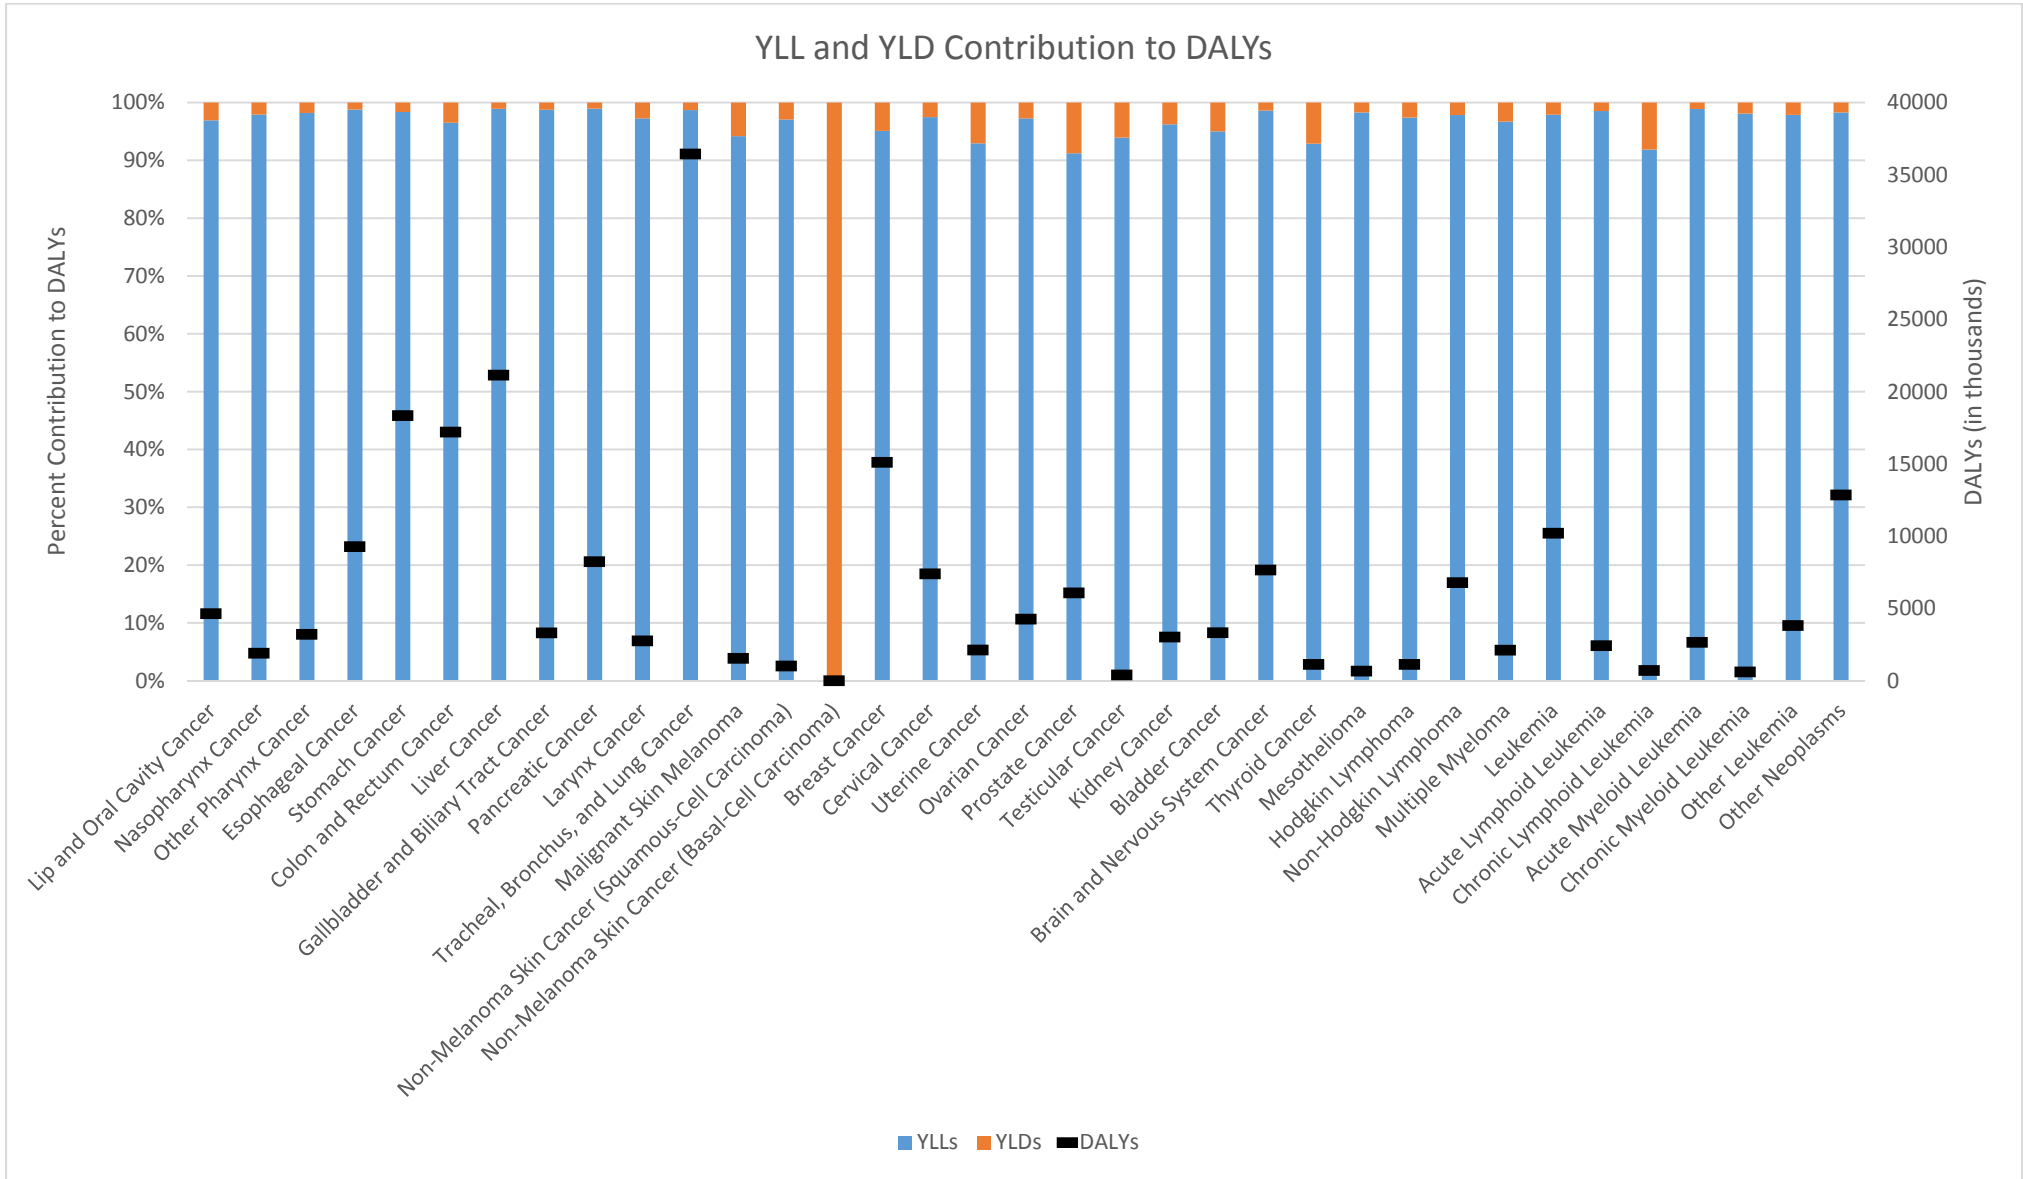

Figure 4: Contribution of YLDs and YLLs to DALYs by cancer, global, both sexes, 2016

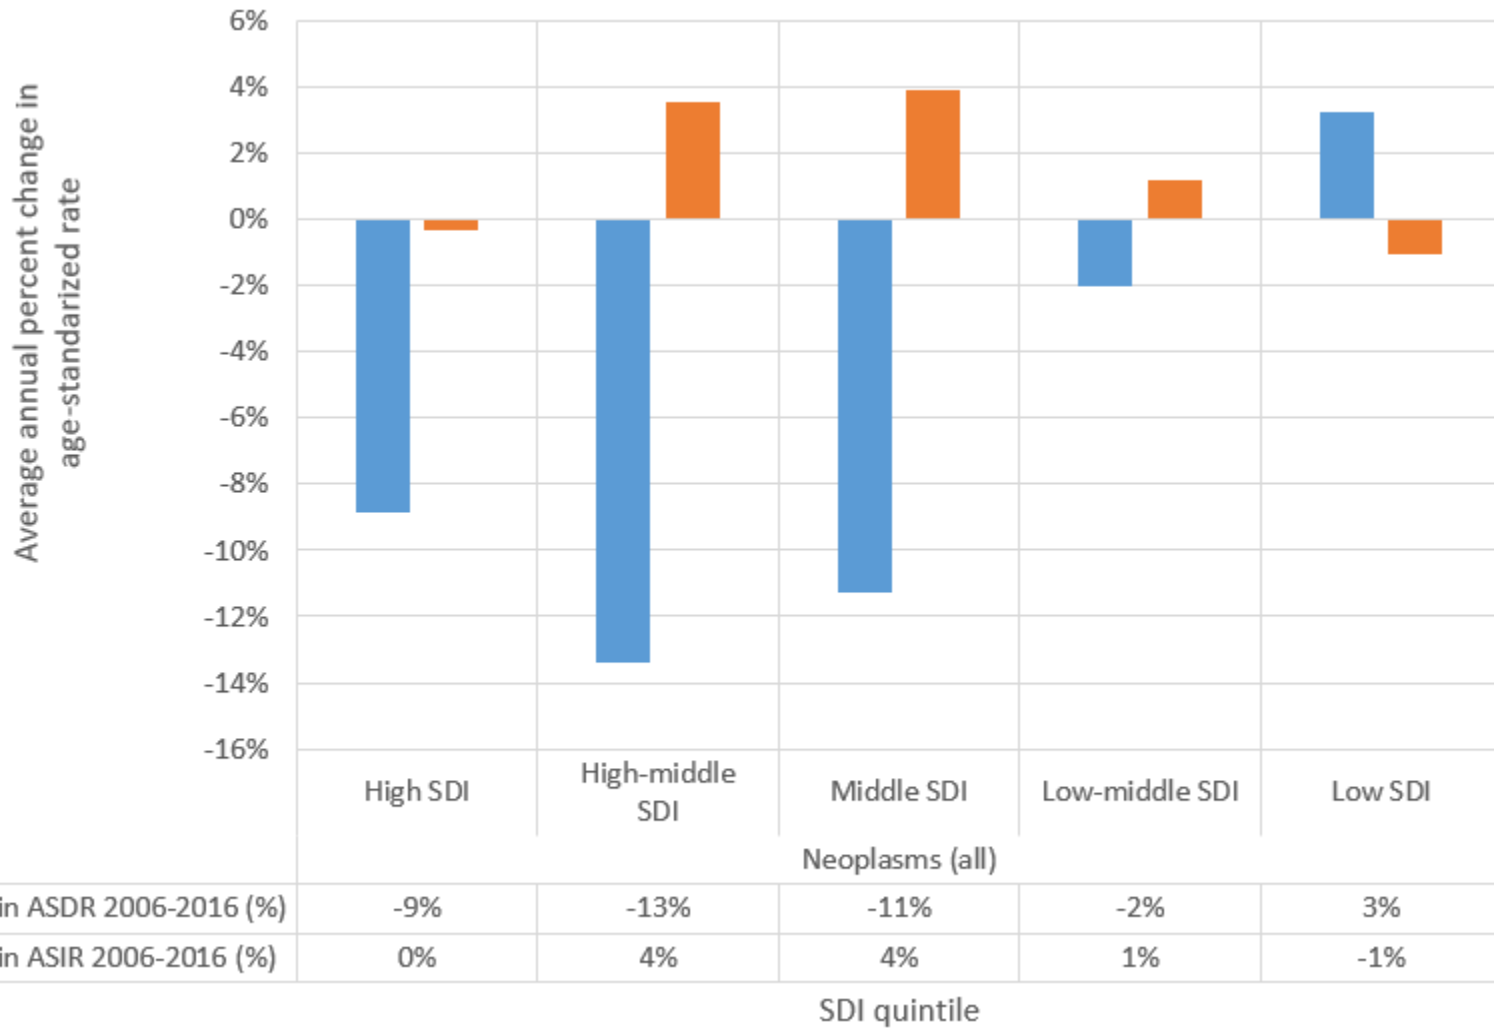

eFigure 5: Average annual percent change in age-standardized death and incidence rates between 2006 and 2016 for both sexes, by SDI quintile, all neoplasms

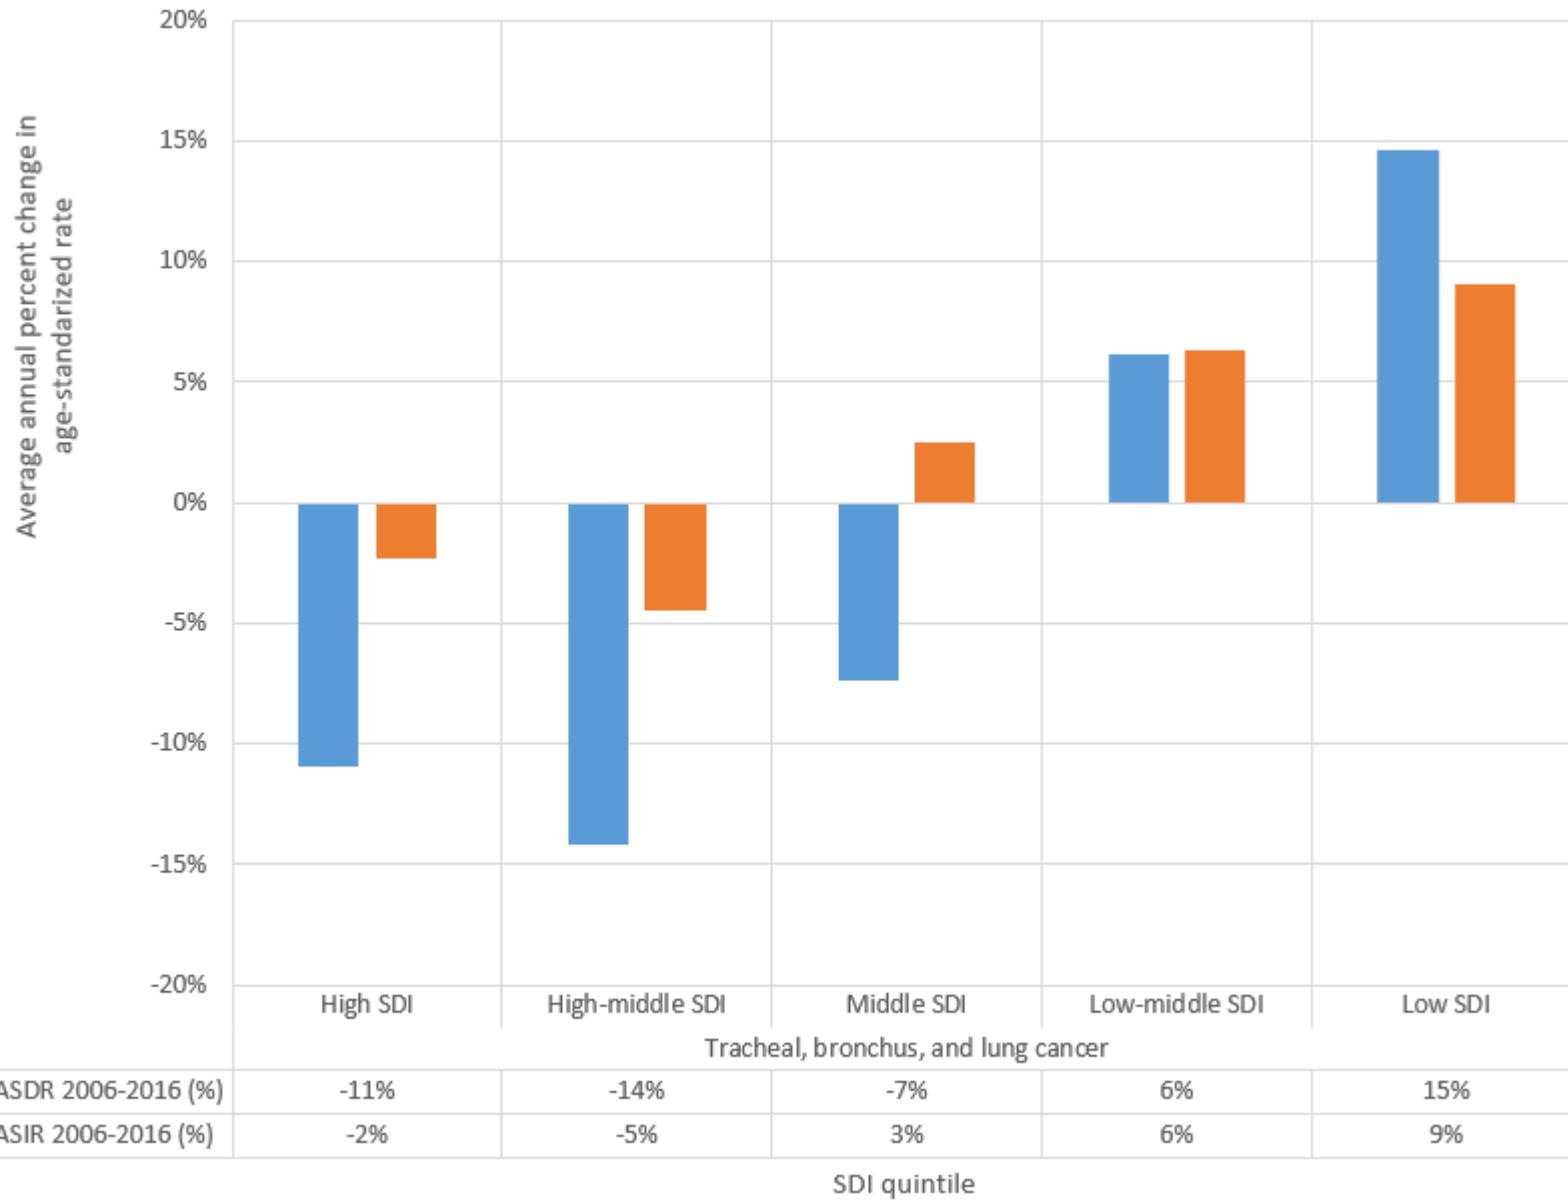

Figure 6: Average annual percent change in age-standardized death and incidence rates between 2006 and 2016 for both sexes, by SDI quintile, tracheal, bronchus, and lung cancer



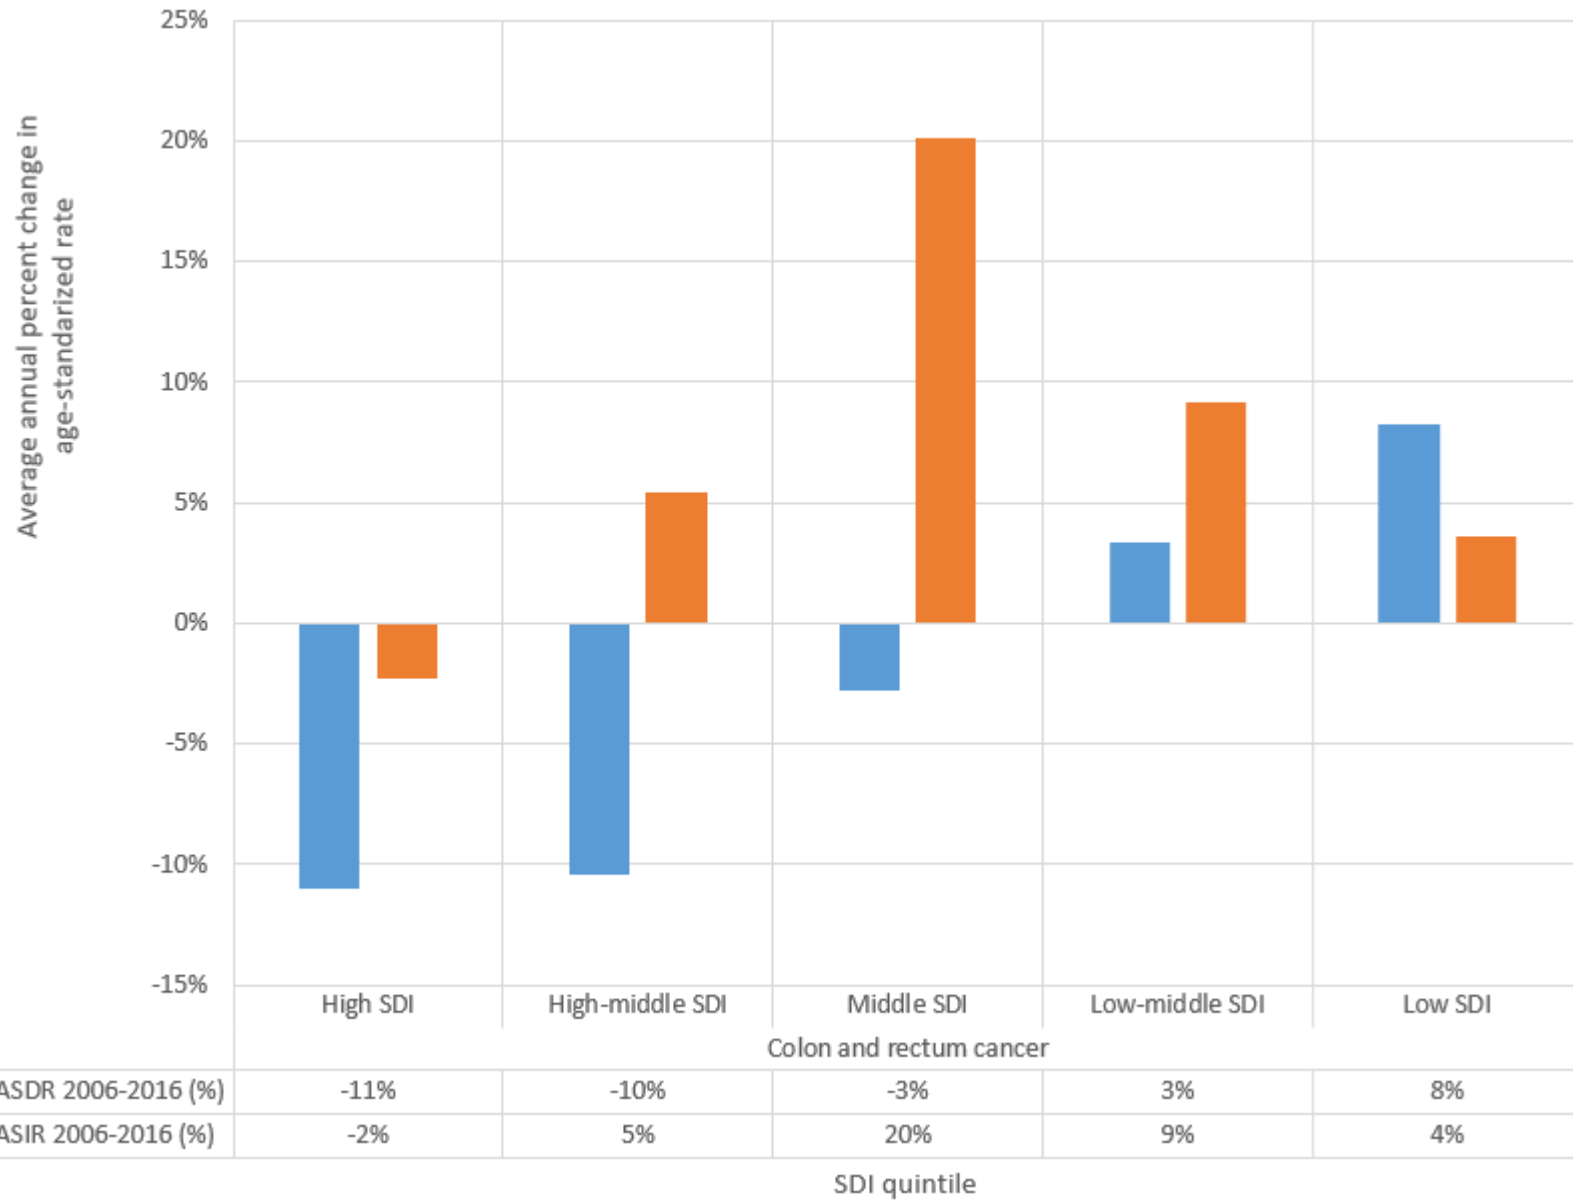

eFigure 7: Average annual percent change in age-standardized death and incidence rates between 2006 and 2016 for both sexes, by SDI quintile, colon and rectum cancer

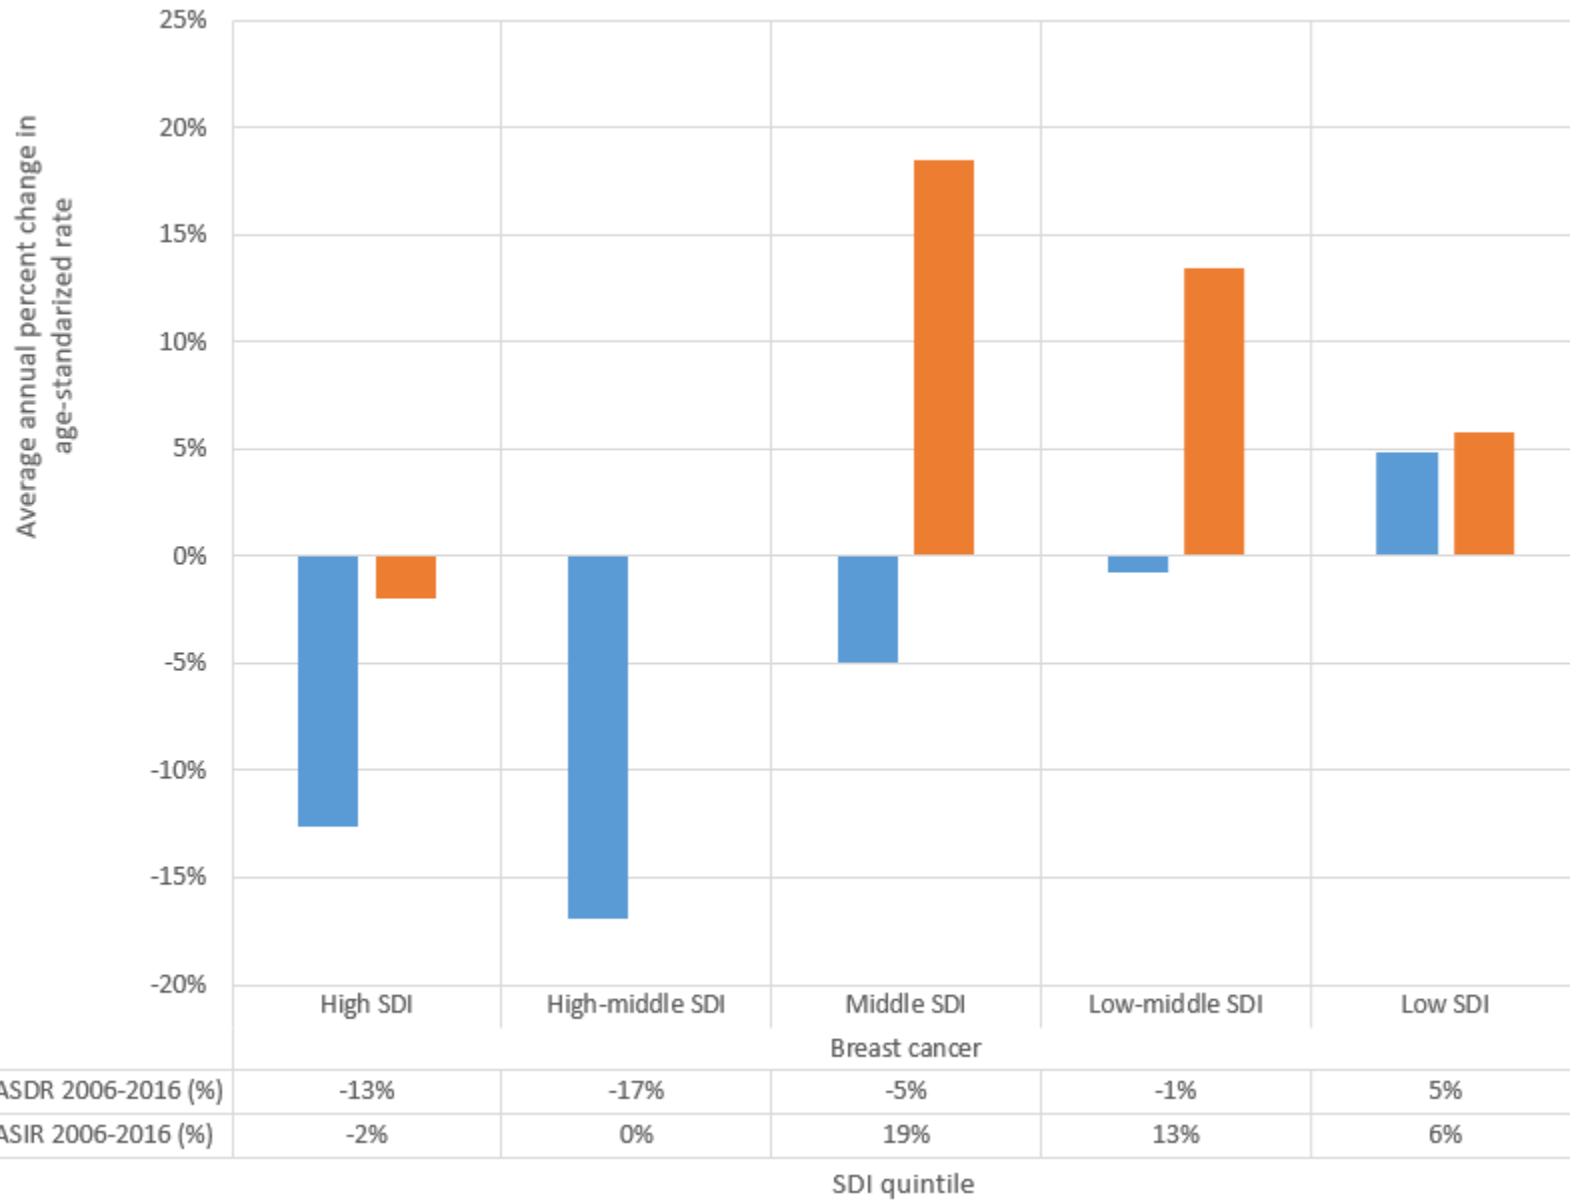

eFigure 8: Average annual percent change in age-standardized death and incidence rates between 2006 and 2016 for both sexes, by SDI quintile, breast cancer

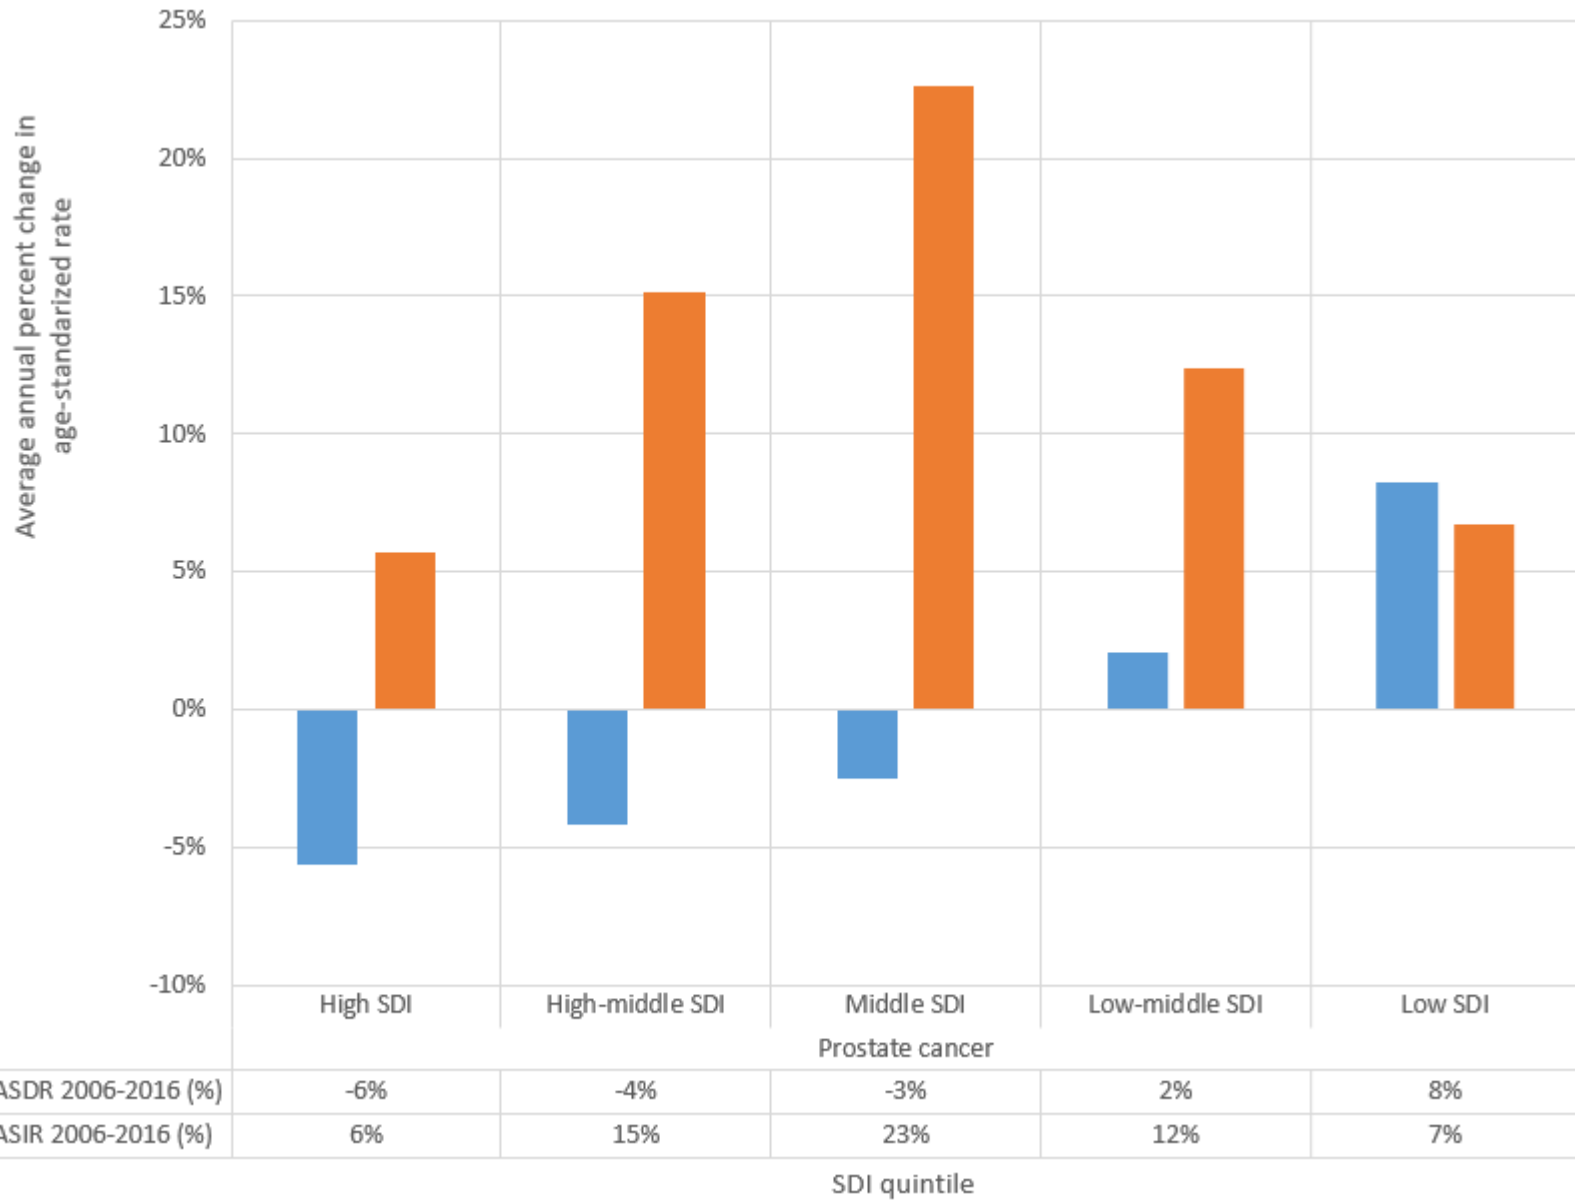

Figure 9: Average annual percent change in age-standardized death and incidence rates between 2006 and 2016, by SDI quintile, prostate cancer

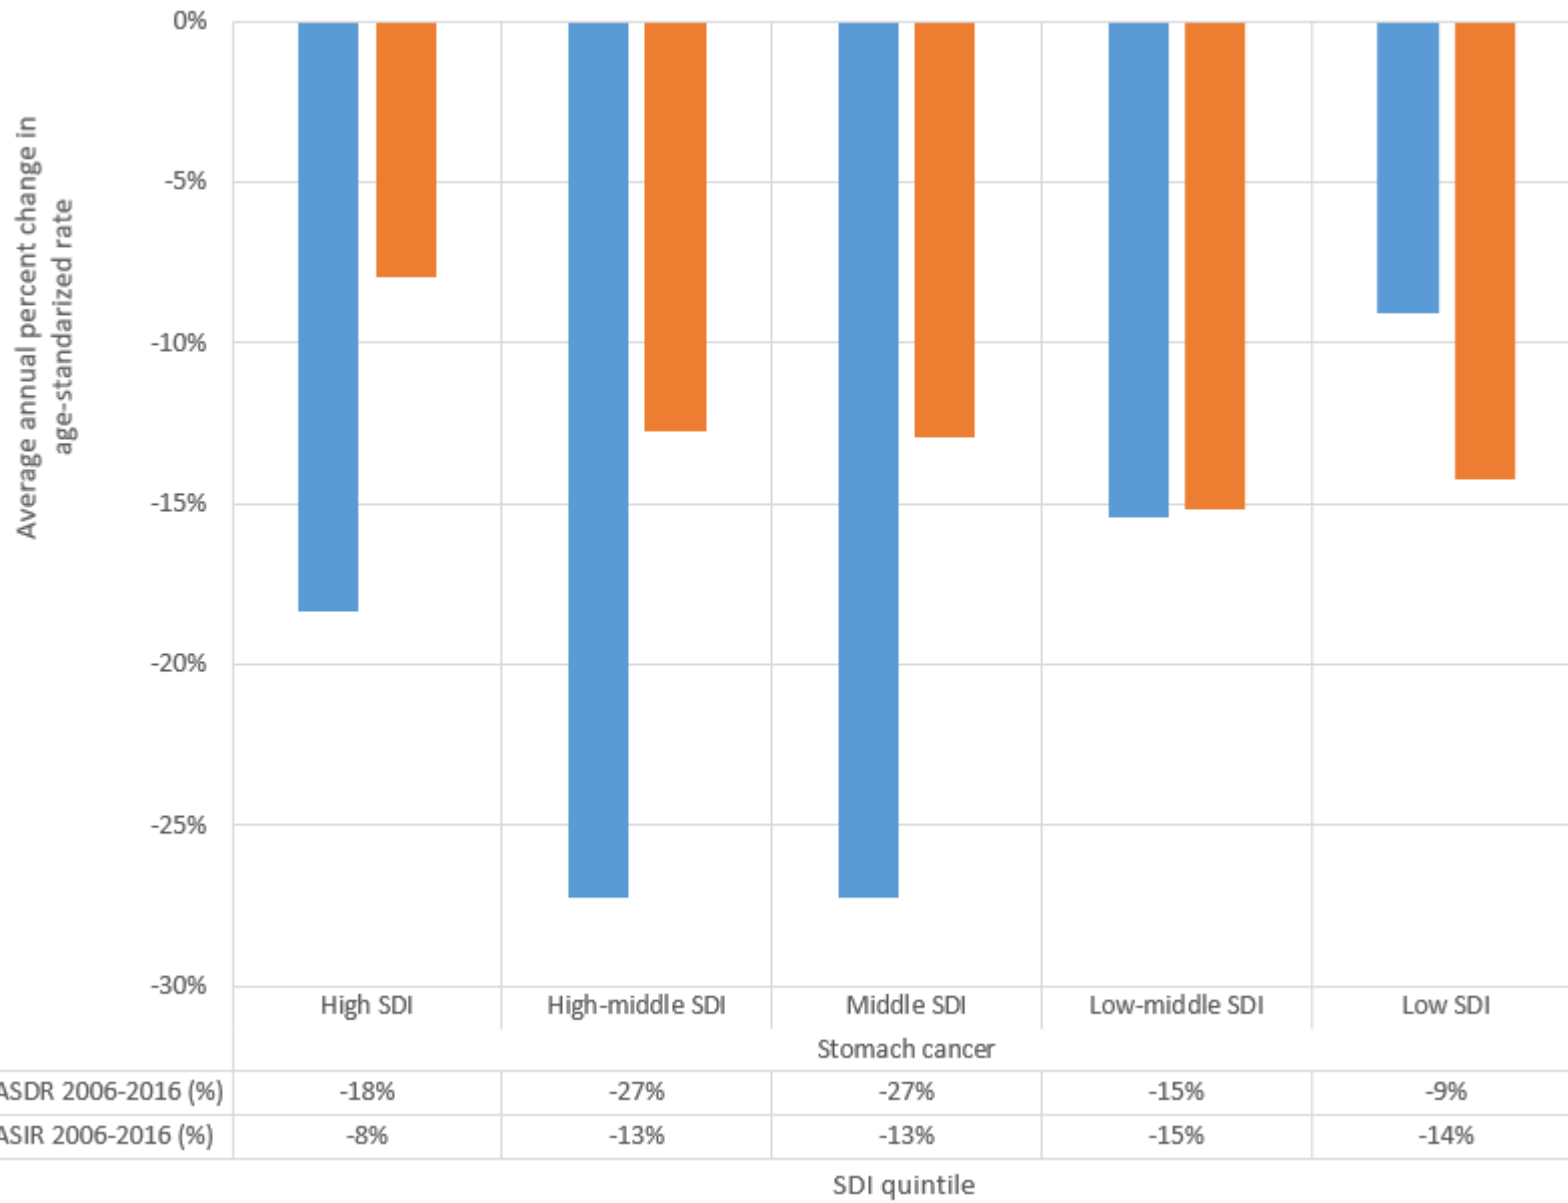

Figure 10: Average annual percent change in age-standardized death and incidence rates between 2006 and 2016 for both sexes, by SDI quintile, stomach cancer

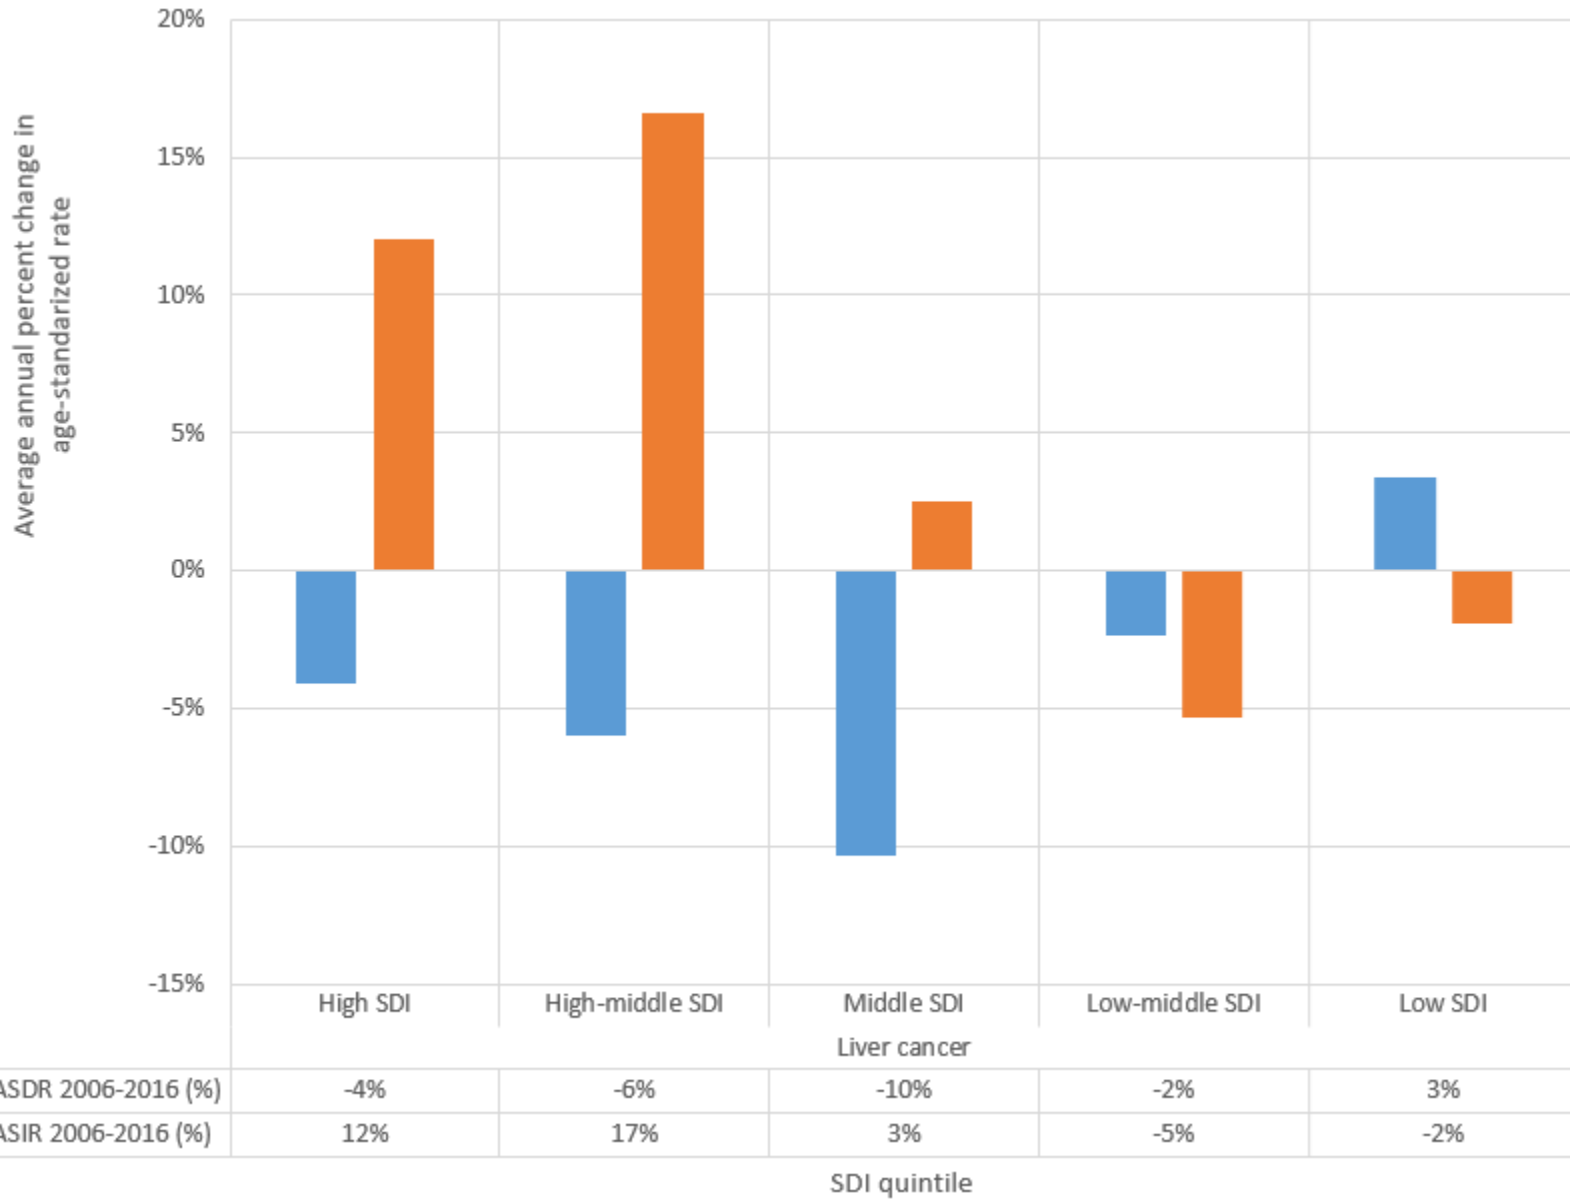

eFigure 11: Average annual percent change in age-standardized death and incidence rates between 2006 and 2016 for both sexes, by SDI quintile, liver cancer

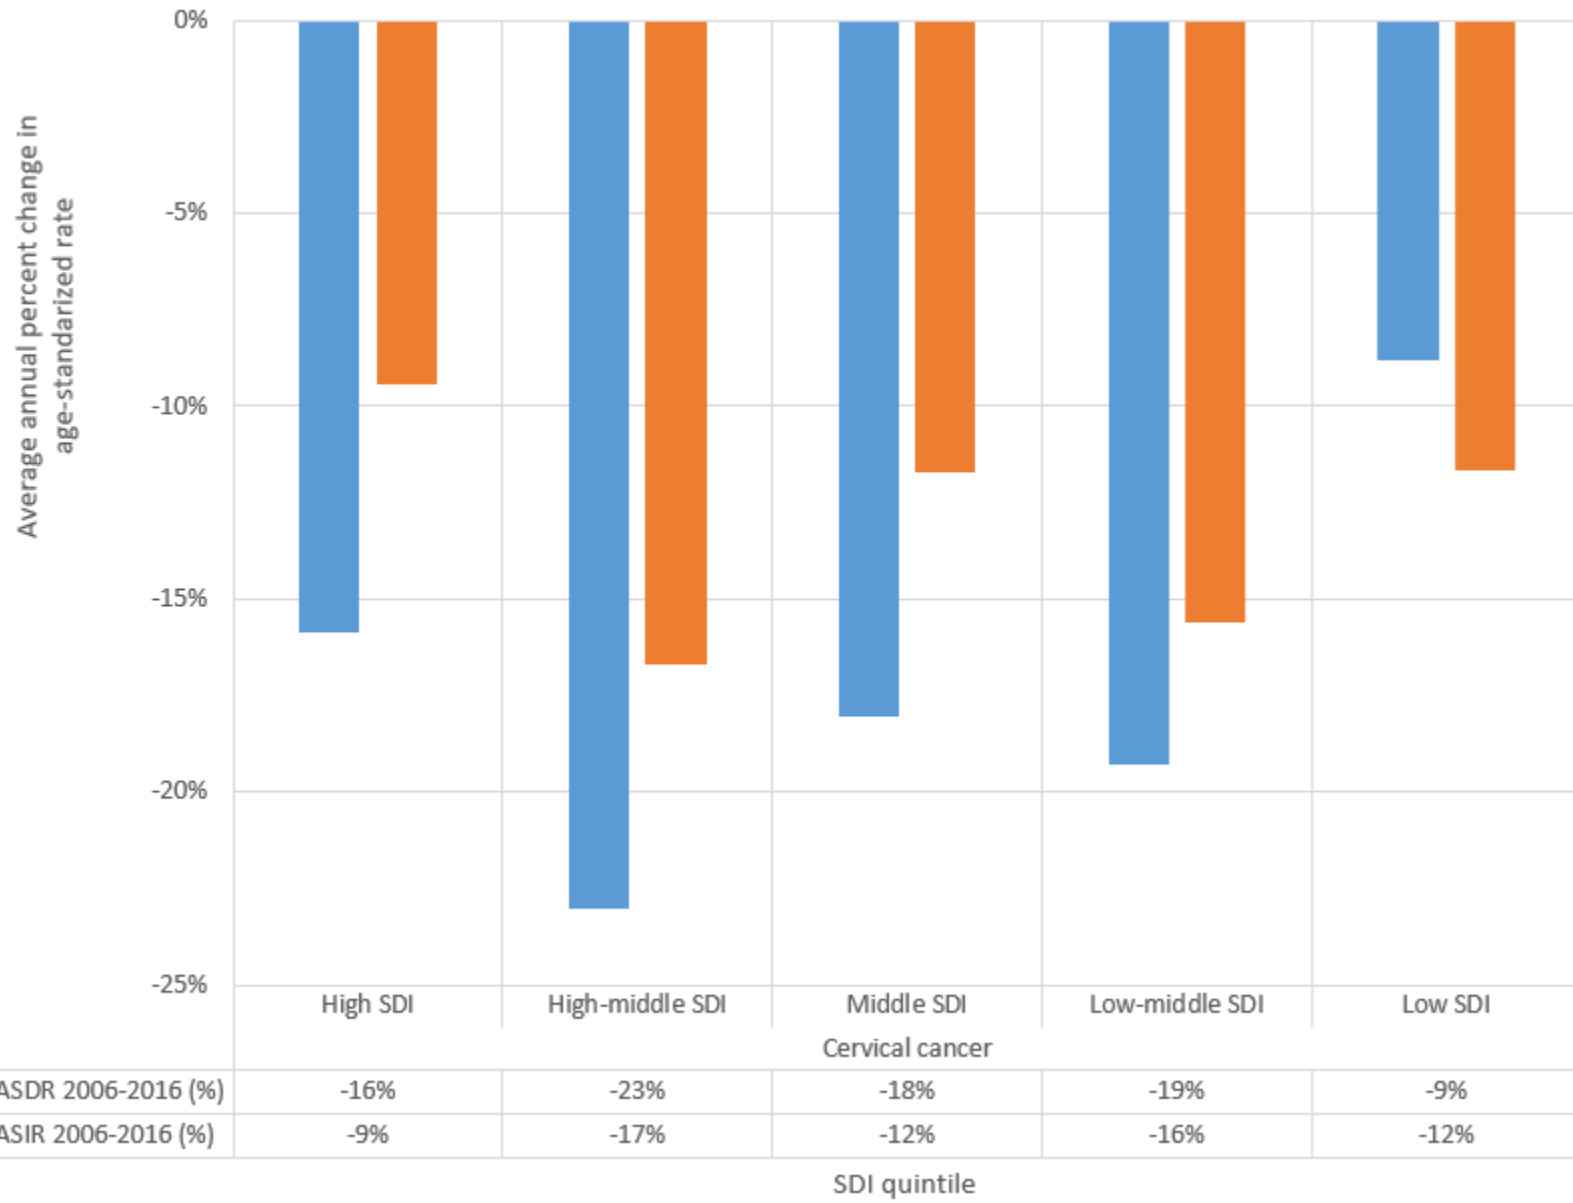

Figure 12: Average annual percent change in age-standardized death and incidence rates between 2006 and 2016, by SDI quintile, cervical cancer

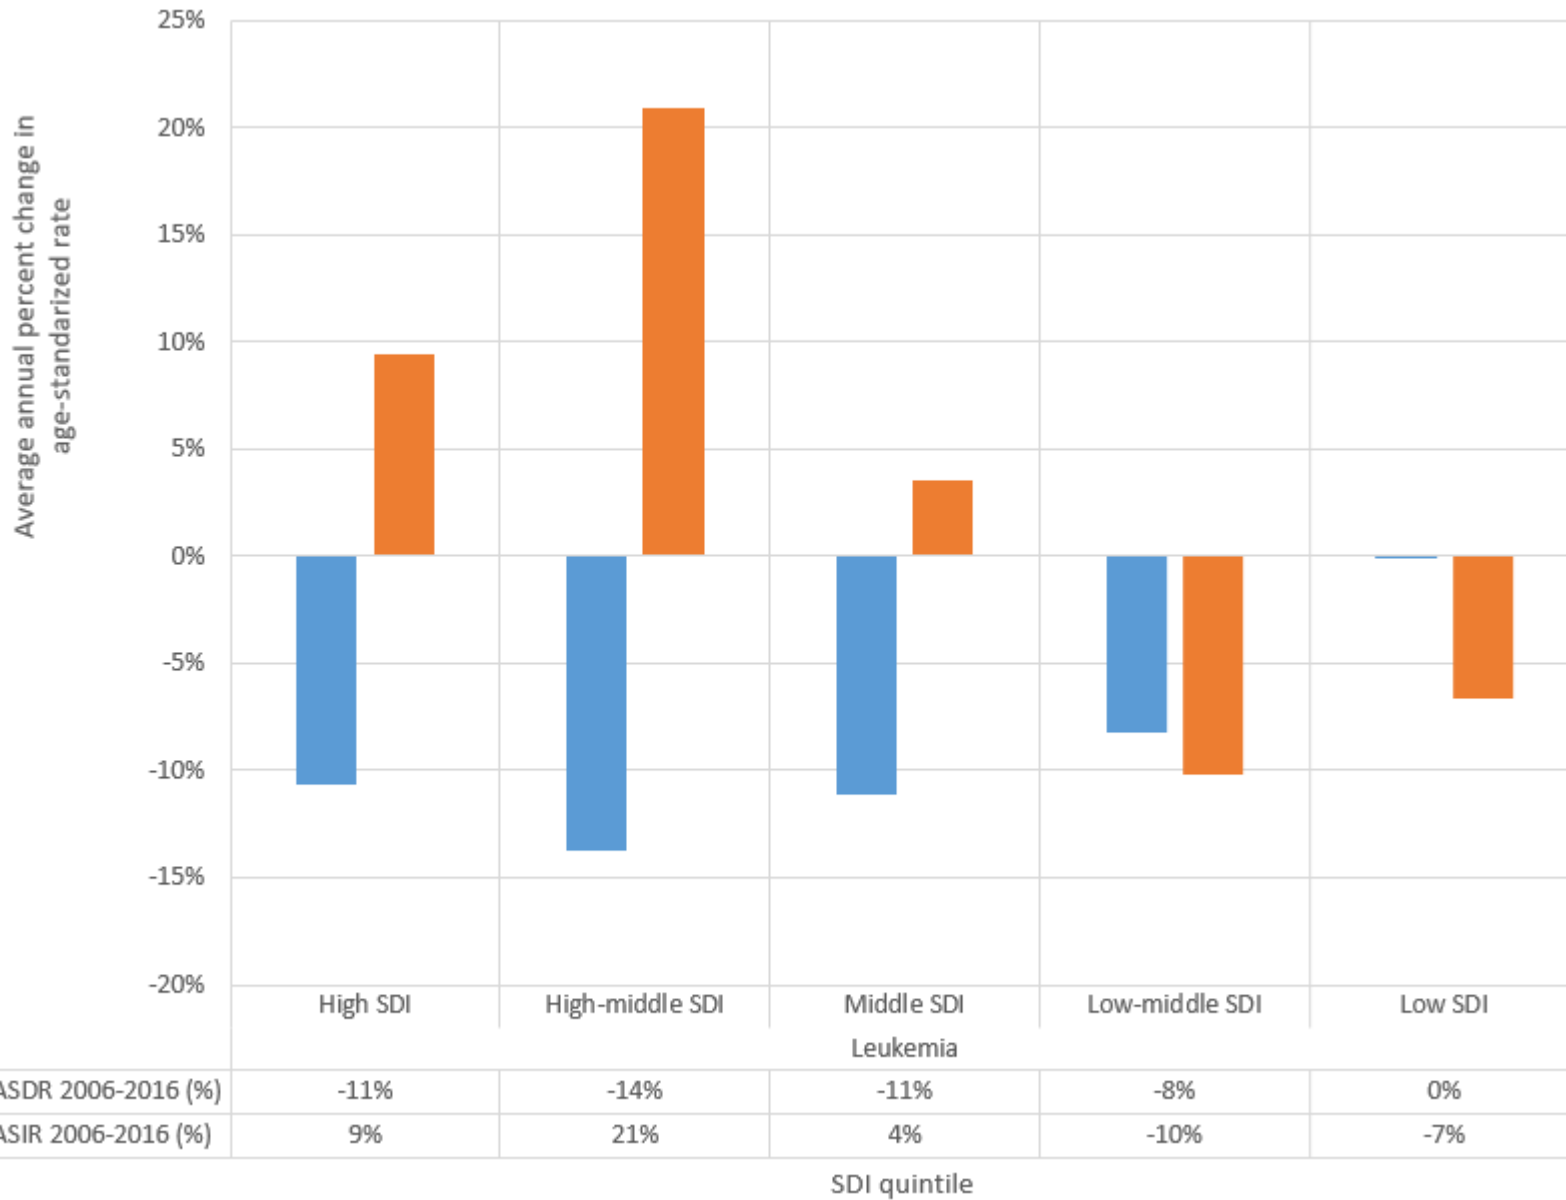

Figure 13: Average annual percent change in age-standardized death and incidence rates between 2006 and 2016 for both sexes, by SDI quintile, leukemia

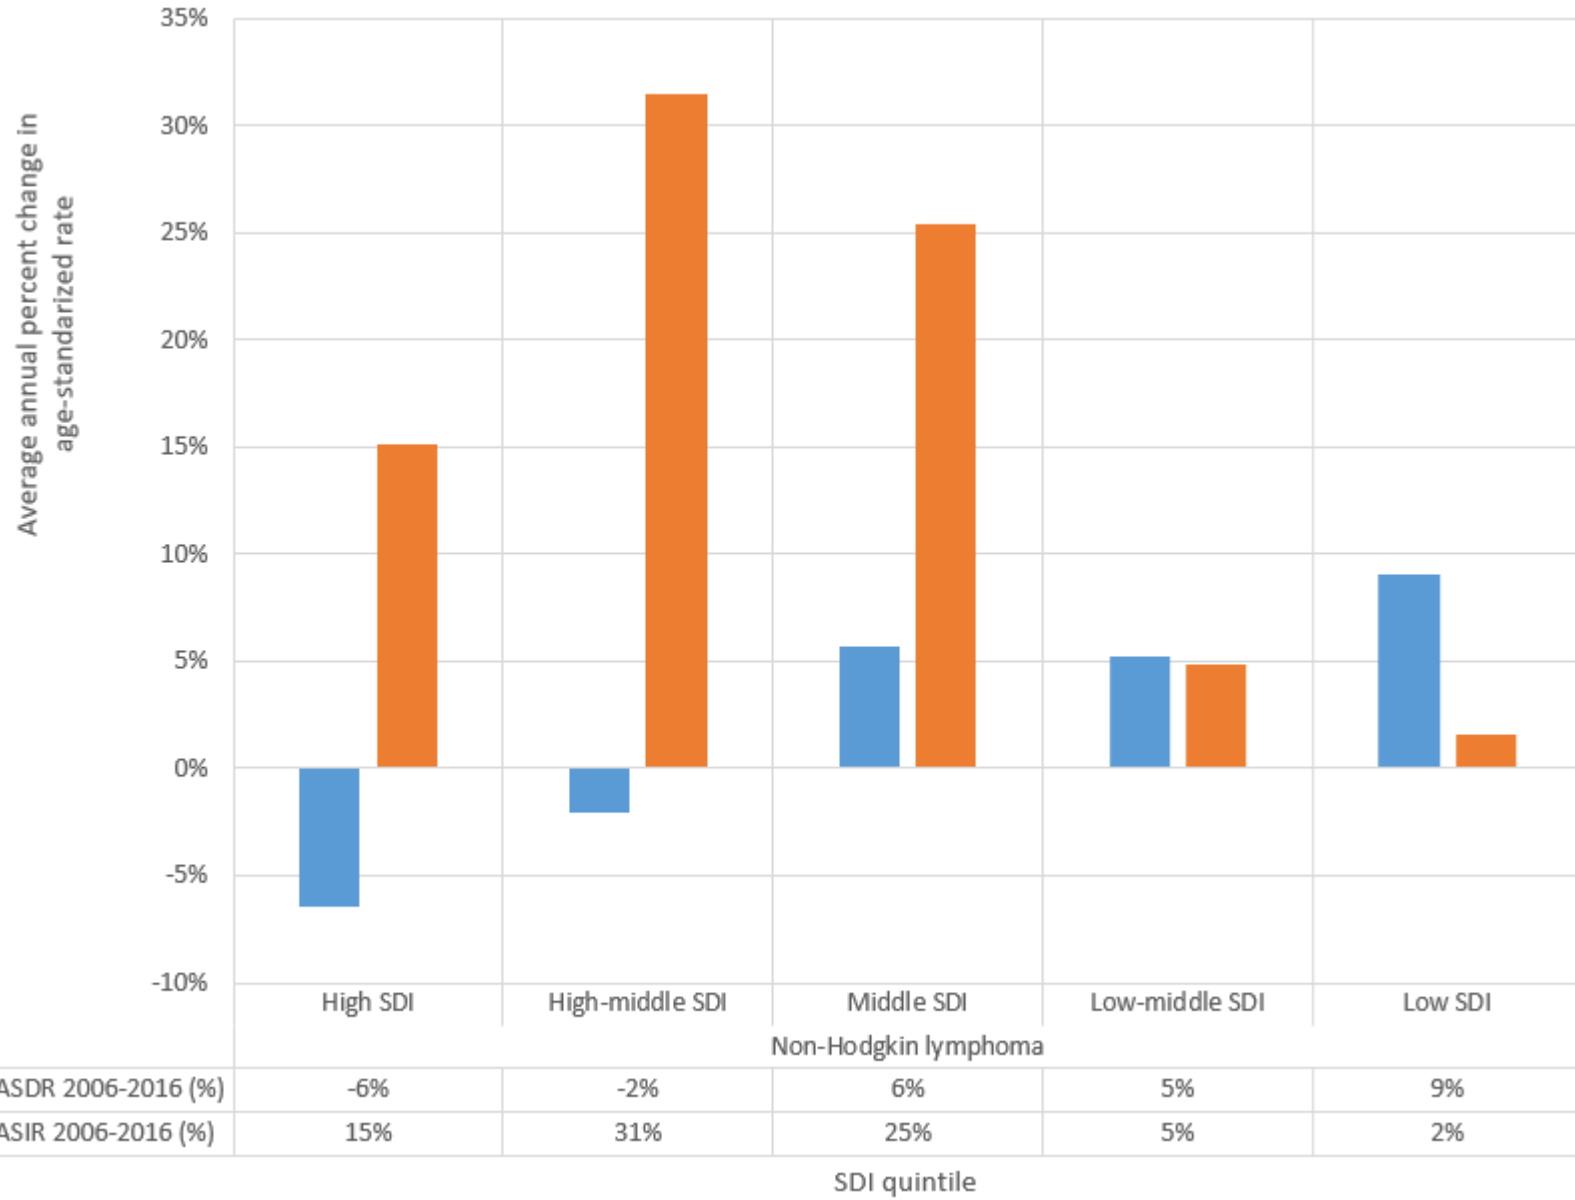

eFigure 14: Average annual percent change in age-standardized death and incidence rates between 2006 and 2016 for both sexes, by SDI quintile, non-Hodgkin lymphoma



| Country         | Tracheal, bronchus, and lung cancer | Colon and rectum cancer | Breast cancer | Non-melanoma skin cancer | Prostate cancer | Stomach cancer | Liver cancer | Cervical cancer | Leukemia | Non-Hodgkin lymphoma | Esophageal cancer | Bladder cancer | Pancreatic cancer | Uterine cancer | Lip and oral cavity cancer | Kidney cancer | Brain and nervous system cancer | Malignant skin melanoma | Ovarian cancer | Thyroid cancer | Larynx cancer | Gallbladder and biliary tract cancer | Other pharynx cancer | Other leukemia | Multiple myeloma | Chronic lymphoid leukemia | Acute myeloid leukemia | Nasopharynx cancer | Acute lymphoid leukemia | Hodgkin lymphoma | Testicular cancer | Mesothelioma | Chronic myeloid leukemia |
|-----------------|-------------------------------------|-------------------------|---------------|--------------------------|-----------------|----------------|--------------|-----------------|----------|----------------------|-------------------|----------------|-------------------|----------------|----------------------------|---------------|---------------------------------|-------------------------|----------------|----------------|---------------|--------------------------------------|----------------------|----------------|------------------|---------------------------|------------------------|--------------------|-------------------------|------------------|-------------------|--------------|--------------------------|
| Global          | 1                                   | 2                       | 3             | 4                        | 5               | 6              | 7            | 9               | 10       | 11                   | 12                | 13             | 14                | 15             | 16                         | 17            | 18                              | 19                      | 20             | 21             | 22            | 23                                   | 24                   | 25             | 26               | 27                        | 28                     | 29                 | 30                      | 31               | 32                | 33           | 34                       |
| High SDI        | 4                                   | 3                       | 5             | 1                        | 2               | 6              | 12           | 23              | 14       | 8                    | 18                | 9              | 11                | 13             | 20                         | 15            | 17                              | 10                      | 19             | 16             | 25            | 22                                   | 27                   | 28             | 21               | 24                        | 26                     | 34                 | 31                      | 30               | 29                | 32           | 33                       |
| High-middle SDI | 1                                   | 2                       | 3             | 5                        | 6               | 4              | 7            | 16              | 10       | 17                   | 13                | 11             | 12                | 9              | 20                         | 14            | 15                              | 21                      | 18             | 19             | 22            | 24                                   | 27                   | 23             | 25               | 28                        | 29                     | 26                 | 30                      | 32               | 31                | 34           | 33                       |
| Middle SDI      | 1                                   | 5                       | 4             | 6                        | 8               | 3              | 2            | 10              | 11       | 17                   | 9                 | 15             | 14                | 16             | 13                         | 18            | 12                              | 28                      | 19             | 20             | 22            | 23                                   | 25                   | 21             | 27               | 30                        | 29                     | 24                 | 26                      | 31               | 32                | 33           | 34                       |
| Low-middle SDI  | 2                                   | 6                       | 1             | 11                       | 9               | 4              | 8            | 5               | 12       | 14                   | 13                | 19             | 18                | 22             | 3                          | 21            | 15                              | 32                      | 16             | 23             | 17            | 20                                   | 10                   | 25             | 28               | 30                        | 26                     | 24                 | 27                      | 29               | 33                | 34           | 31                       |
| Low SDI         | 8                                   | 7                       | 2             | 10                       | 5               | 6              | 4            | 1               | 12       | 9                    | 11                | 17             | 15                | 19             | 14                         | 18            | 16                              | 30                      | 13             | 23             | 22            | 21                                   | 27                   | 20             | 24               | 32                        | 28                     | 25                 | 29                      | 26               | 34                | 33           | 31                       |
| South Asia      | 3                                   | 7                       | 2             | 21                       | 12              | 5              | 13           | 6               | 10       | 15                   | 9                 | 18             | 19                | 22             | 1                          | 23            | 17                              | 33                      | 14             | 20             | 11            | 16                                   | 8                    | 29             | 26               | 30                        | 25                     | 24                 | 27                      | 28               | 32                | 34           | 31                       |
| India           | 6                                   | 8                       | 1             | 19                       | 11              | 5              | 13           | 4               | 10       | 16                   | 9                 | 21             | 18                | 22             | 2                          | 23            | 17                              | 32                      | 15             | 20             | 12            | 14                                   | 7                    | 29             | 26               | 30                        | 25                     | 24                 | 27                      | 28               | 33                | 34           | 31                       |
| Pakistan        | 3                                   | 4                       | 2             | 31                       | 15              | 12             | 14           | 18              | 13       | 8                    | 6                 | 7              | 21                | 17             | 1                          | 22            | 16                              | 33                      | 9              | 19             | 10            | 20                                   | 11                   | 28             | 23               | 32                        | 25                     | 27                 | 26                      | 24               | 29                | 34           | 30                       |
| Bangladesh      | 1                                   | 3                       | 4             | 24                       | 11              | 6              | 9            | 7               | 14       | 17                   | 12                | 19             | 13                | 23             | 2                          | 21            | 15                              | 34                      | 18             | 20             | 10            | 16                                   | 8                    | 29             | 26               | 30                        | 25                     | 22                 | 27                      | 28               | 33                | 32           | 31                       |
| Nepal           | 5                                   | 7                       | 1             | 28                       | 14              | 2              | 11           | 3               | 10       | 17                   | 8                 | 19             | 13                | 23             | 4                          | 21            | 18                              | 33                      | 15             | 20             | 16            | 12                                   | 9                    | 27             | 26               | 30                        | 25                     | 22                 | 24                      | 29               | 34                | 32           | 31                       |
| Bhutan          | 4                                   | 5                       | 2             | 26                       | 11              | 7              | 9            | 6               | 12       | 14                   | 10                | 20             | 15                | 25             | 1                          | 21            | 13                              | 32                      | 16             | 19             | 17            | 18                                   | 8                    | 29             | 27               | 30                        | 22                     | 23                 | 24                      | 28               | 34                | 33           | 31                       |
| East Asia       | 1                                   | 4                       | 5             | 8                        | 10              | 3              | 2            | 12              | 9        | 15                   | 6                 | 16             | 13                | 14             | 18                         | 20            | 11                              | 29                      | 23             | 21             | 22            | 24                                   | 30                   | 17             | 27               | 26                        | 28                     | 19                 | 25                      | 31               | 32                | 33           | 34                       |
| China           | 1                                   | 4                       | 5             | 8                        | 10              | 3              | 2            | 12              | 9        | 15                   | 6                 | 17             | 13                | 14             | 19                         | 20            | 11                              | 29                      | 23             | 21             | 22            | 24                                   | 30                   | 16             | 26               | 27                        | 28                     | 18                 | 25                      | 31               | 32                | 33           | 34                       |
| North Korea     | 1                                   | 5                       | 7             | 23                       | 16              | 2              | 3            | 6               | 8        | 17                   | 4                 | 13             | 10                | 18             | 19                         | 15            | 11                              | 30                      | 20             | 26             | 22            | 21                                   | 31                   | 12             | 28               | 25                        | 27                     | 14                 | 24                      | 29               | 34                | 32           | 33                       |
| Taiwan          | 3                                   | 1                       | 4             | 20                       | 7               | 5              | 2            | 15              | 12       | 11                   | 9                 | 10             | 16                | 13             | 8                          | 17            | 21                              | 32                      | 22             | 14             | 26            | 23                                   | 18                   | 27             | 28               | 25                        | 29                     | 19                 | 24                      | 31               | 30                | 34           | 33                       |
| Southeast Asia  | 2                                   | 3                       | 1             | 12                       | 6               | 7              | 4            | 5               | 11       | 13                   | 22                | 17             | 14                | 18             | 9                          | 16            | 19                              | 30                      | 10             | 15             | 25            | 23                                   | 21                   | 24             | 28               | 34                        | 27                     | 20                 | 26                      | 29               | 31                | 33           | 32                       |
| Indonesia       | 5                                   | 3                       | 1             | 8                        | 4               | 7              | 9            | 2               | 19       | 11                   | 25                | 18             | 13                | 12             | 14                         | 17            | 15                              | 31                      | 10             | 16             | 22            | 21                                   | 23                   | 24             | 26               | 34                        | 29                     | 20                 | 28                      | 27               | 30                | 32           | 33                       |
| Philippines     | 2                                   | 3                       | 1             | 20                       | 6               | 13             | 4            | 5               | 8        | 16                   | 25                | 23             | 19                | 14             | 10                         | 12            | 17                              | 30                      | 9              | 11             | 24            | 28                                   | 26                   | 15             | 27               | 31                        | 21                     | 18                 | 22                      | 33               | 32                | 34           | 29                       |
| Vietnam         | 1                                   | 2                       | 4             | 13                       | 15              | 5              | 3            | 9               | 19       | 10                   | 12                | 18             | 14                | 20             | 6                          | 22            | 21                              | 31                      | 16             | 11             | 23            | 24                                   | 7                    | 30             | 27               | 33                        | 26                     | 17                 | 25                      | 28               | 29                | 34           | 32                       |
| Thailand        | 2                                   | 4                       | 3             | 16                       | 7               | 10             | 1            | 5               | 9        | 22                   | 18                | 12             | 15                | 24             | 6                          | 19            | 17                              | 30                      | 14             | 23             | 20            | 8                                    | 26                   | 13             | 27               | 34                        | 31                     | 21                 | 25                      | 28               | 32                | 29           | 33                       |
| Myanmar         | 1                                   | 3                       | 4             | 13                       | 6               | 5              | 7            | 2               | 9        | 16                   | 22                | 14             | 12                | 17             | 10                         | 15            | 18                              | 31                      | 11             | 23             | 21            | 24                                   | 26                   | 19             | 28               | 33                        | 27                     | 20                 | 25                      | 29               | 34                | 32           | 30                       |
| Malaysia        | 3                                   | 2                       | 1             | 19                       | 5               | 10             | 7            | 8               | 6        | 9                    | 23                | 14             | 17                | 18             | 15                         | 16            | 21                              | 33                      | 12             | 13             | 25            | 28                                   | 26                   | 22             | 27               | 31                        | 24                     | 11                 | 20                      | 29               | 30                | 34           | 32                       |
| Sri Lanka       | 4                                   | 3                       | 1             | 19                       | 8               | 9              | 12           | 11              | 5        | 14                   | 10                | 17             | 15                | 20             | 2                          | 7             | 16                              | 33                      | 13             | 21             | 27            | 24                                   | 18                   | 22             | 28               | 34                        | 26                     | 25                 | 23                      | 29               | 31                | 30           | 32                       |

| Country                      | Tracheal, bronchus, and lung cancer | Colon and rectum cancer | Breast cancer | Non-melanoma skin cancer | Prostate cancer | Stomach cancer | Liver cancer | Cervical cancer | Leukemia | Non-Hodgkin lymphoma | Esophageal cancer | Bladder cancer | Pancreatic cancer | Uterine cancer | Lip and oral cavity cancer | Kidney cancer | Brain and nervous system cancer | Malignant skin melanoma | Ovarian cancer | Thyroid cancer | Larynx cancer | Gallbladder and biliary tract cancer | Other pharynx cancer | Other leukemia | Multiple myeloma | Chronic lymphoid leukemia | Acute myeloid leukemia | Nasopharynx cancer | Acute lymphoid leukemia | Hodgkin lymphoma | Testicular cancer | Mesothelioma | Chronic myeloid leukemia |
|------------------------------|-------------------------------------|-------------------------|---------------|--------------------------|-----------------|----------------|--------------|-----------------|----------|----------------------|-------------------|----------------|-------------------|----------------|----------------------------|---------------|---------------------------------|-------------------------|----------------|----------------|---------------|--------------------------------------|----------------------|----------------|------------------|---------------------------|------------------------|--------------------|-------------------------|------------------|-------------------|--------------|--------------------------|
| Cambodia                     | 1                                   | 4                       | 2             | 13                       | 10              | 5              | 8            | 3               | 7        | 14                   | 21                | 18             | 12                | 20             | 9                          | 17            | 16                              | 31                      | 11             | 24             | 22            | 23                                   | 26                   | 15             | 29               | 33                        | 27                     | 19                 | 25                      | 28               | 32                | 34           | 30                       |
| Laos                         | 1                                   | 4                       | 2             | 15                       | 9               | 5              | 6            | 3               | 7        | 13                   | 21                | 18             | 14                | 20             | 10                         | 17            | 16                              | 31                      | 12             | 25             | 22            | 23                                   | 26                   | 11             | 29               | 32                        | 27                     | 19                 | 24                      | 28               | 33                | 34           | 30                       |
| Mauritius                    | 4                                   | 2                       | 1             | 16                       | 3               | 6              | 14           | 7               | 13       | 18                   | 17                | 11             | 12                | 9              | 8                          | 15            | 22                              | 31                      | 10             | 20             | 21            | 23                                   | 25                   | 19             | 26               | 32                        | 29                     | 24                 | 27                      | 28               | 30                | 34           | 33                       |
| Timor-Leste                  | 1                                   | 4                       | 2             | 14                       | 6               | 8              | 9            | 3               | 7        | 12                   | 21                | 18             | 13                | 20             | 10                         | 17            | 16                              | 30                      | 11             | 24             | 25            | 22                                   | 26                   | 15             | 28               | 32                        | 27                     | 19                 | 23                      | 29               | 34                | 33           | 31                       |
| Maldives                     | 2                                   | 4                       | 1             | 12                       | 7               | 16             | 6            | 5               | 8        | 14                   | 19                | 9              | 15                | 23             | 3                          | 17            | 18                              | 29                      | 11             | 13             | 22            | 25                                   | 31                   | 20             | 24               | 32                        | 26                     | 27                 | 21                      | 33               | 34                | 28           | 30                       |
| Seychelles                   | 6                                   | 3                       | 2             | 20                       | 1               | 13             | 14           | 4               | 8        | 9                    | 18                | 7              | 15                | 23             | 5                          | 16            | 19                              | 30                      | 12             | 27             | 10            | 28                                   | 11                   | 21             | 24               | 33                        | 26                     | 22                 | 25                      | 29               | 31                | 34           | 32                       |
| North Africa and Middle East | 2                                   | 3                       | 1             | 9                        | 4               | 5              | 8            | 18              | 7        | 12                   | 21                | 6              | 13                | 19             | 22                         | 16            | 11                              | 28                      | 17             | 15             | 20            | 24                                   | 33                   | 14             | 25               | 29                        | 23                     | 30                 | 27                      | 26               | 31                | 34           | 32                       |
| Egypt                        | 4                                   | 5                       | 3             | 15                       | 8               | 10             | 1            | 18              | 7        | 13                   | 17                | 2              | 11                | 16             | 21                         | 14            | 12                              | 30                      | 9              | 26             | 22            | 24                                   | 31                   | 23             | 25               | 29                        | 20                     | 32                 | 27                      | 19               | 34                | 33           | 28                       |
| Iran                         | 4                                   | 5                       | 1             | 7                        | 3               | 2              | 10           | 21              | 6        | 18                   | 13                | 11             | 16                | 19             | 22                         | 17            | 8                               | 27                      | 20             | 15             | 14            | 28                                   | 33                   | 12             | 29               | 23                        | 24                     | 34                 | 25                      | 26               | 30                | 31           | 32                       |
| Turkey                       | 1                                   | 3                       | 2             | 4                        | 5               | 6              | 15           | 21              | 8        | 12                   | 28                | 7              | 9                 | 14             | 25                         | 13            | 10                              | 19                      | 16             | 18             | 17            | 27                                   | 33                   | 26             | 20               | 24                        | 22                     | 31                 | 29                      | 32               | 23                | 30           | 34                       |
| Algeria                      | 3                                   | 2                       | 1             | 10                       | 4               | 6              | 17           | 9               | 11       | 7                    | 26                | 13             | 12                | 20             | 24                         | 18            | 15                              | 28                      | 19             | 8              | 22            | 14                                   | 29                   | 21             | 25               | 31                        | 27                     | 16                 | 30                      | 23               | 33                | 34           | 32                       |
| Iraq                         | 2                                   | 7                       | 1             | 16                       | 13              | 10             | 11           | 18              | 3        | 9                    | 25                | 6              | 12                | 21             | 20                         | 14            | 5                               | 33                      | 15             | 19             | 17            | 26                                   | 32                   | 8              | 29               | 30                        | 23                     | 28                 | 24                      | 22               | 31                | 34           | 27                       |
| Sudan                        | 2                                   | 5                       | 1             | 7                        | 11              | 6              | 3            | 12              | 4        | 13                   | 18                | 14             | 15                | 19             | 20                         | 16            | 10                              | 32                      | 17             | 23             | 26            | 21                                   | 31                   | 9              | 27               | 30                        | 22                     | 29                 | 24                      | 25               | 33                | 34           | 28                       |
| Morocco                      | 2                                   | 3                       | 1             | 10                       | 5               | 9              | 20           | 4               | 16       | 7                    | 23                | 11             | 13                | 17             | 19                         | 21            | 15                              | 29                      | 12             | 8              | 14            | 24                                   | 27                   | 22             | 26               | 34                        | 28                     | 18                 | 30                      | 25               | 33                | 31           | 32                       |
| Afghanistan                  | 3                                   | 5                       | 1             | 8                        | 16              | 2              | 10           | 7               | 4        | 12                   | 13                | 15             | 17                | 18             | 23                         | 22            | 11                              | 34                      | 21             | 27             | 20            | 19                                   | 31                   | 6              | 29               | 30                        | 28                     | 26                 | 25                      | 14               | 33                | 32           | 24                       |
| Saudi Arabia                 | 7                                   | 2                       | 1             | 12                       | 5               | 15             | 4            | 20              | 8        | 6                    | 24                | 11             | 13                | 17             | 19                         | 14            | 9                               | 30                      | 18             | 3              | 25            | 23                                   | 31                   | 16             | 22               | 33                        | 26                     | 27                 | 29                      | 21               | 28                | 34           | 32                       |
| Yemen                        | 2                                   | 5                       | 1             | 6                        | 13              | 4              | 8            | 10              | 3        | 12                   | 19                | 15             | 14                | 18             | 21                         | 17            | 11                              | 34                      | 16             | 25             | 26            | 20                                   | 31                   | 7              | 29               | 30                        | 24                     | 28                 | 23                      | 22               | 32                | 33           | 27                       |
| Syria                        | 4                                   | 5                       | 2             | 6                        | 8               | 10             | 9            | 20              | 1        | 15                   | 25                | 14             | 12                | 22             | 23                         | 19            | 7                               | 29                      | 16             | 28             | 24            | 27                                   | 30                   | 3              | 26               | 18                        | 13                     | 31                 | 17                      | 33               | 34                | 32           | 21                       |
| Tunisia                      | 2                                   | 3                       | 1             | 9                        | 5               | 8              | 23           | 17              | 11       | 6                    | 28                | 4              | 13                | 14             | 18                         | 15            | 16                              | 27                      | 19             | 10             | 12            | 21                                   | 29                   | 25             | 22               | 31                        | 26                     | 20                 | 30                      | 24               | 33                | 34           | 32                       |
| United Arab Emirates         | 5                                   | 2                       | 1             | 4                        | 3               | 14             | 12           | 16              | 10       | 6                    | 25                | 11             | 15                | 20             | 19                         | 13            | 8                               | 26                      | 23             | 9              | 21            | 30                                   | 29                   | 18             | 22               | 33                        | 28                     | 27                 | 32                      | 24               | 17                | 34           | 31                       |
| Jordan                       | 3                                   | 2                       | 1             | 12                       | 6               | 11             | 18           | 20              | 4        | 7                    | 25                | 9              | 13                | 15             | 19                         | 14            | 10                              | 27                      | 16             | 17             | 23            | 21                                   | 29                   | 5              | 22               | 30                        | 28                     | 24                 | 31                      | 33               | 26                | 32           | 34                       |
| Libya                        | 3                                   | 2                       | 1             | 19                       | 5               | 12             | 13           | 16              | 8        | 6                    | 28                | 4              | 11                | 20             | 24                         | 14            | 10                              | 30                      | 17             | 9              | 15            | 22                                   | 33                   | 21             | 23               | 29                        | 26                     | 25                 | 27                      | 18               | 31                | 34           | 32                       |
| Lebanon                      | 4                                   | 5                       | 1             | 8                        | 2               | 11             | 21           | 23              | 9        | 6                    | 29                | 3              | 17                | 13             | 22                         | 18            | 12                              | 24                      | 14             | 10             | 15            | 25                                   | 32                   | 19             | 20               | 30                        | 27                     | 33                 | 28                      | 16               | 26                | 34           | 31                       |
| Palestine                    | 1                                   | 3                       | 2             | 9                        | 10              | 8              | 7            | 18              | 4        | 13                   | 25                | 14             | 12                | 16             | 19                         | 15            | 5                               | 31                      | 17             | 27             | 26            | 23                                   | 32                   | 6              | 21               | 30                        | 20                     | 29                 | 22                      | 24               | 33                | 34           | 28                       |
| Oman                         | 3                                   | 2                       | 1             | 11                       | 4               | 9              | 8            | 16              | 7        | 6                    | 19                | 13             | 14                | 23             | 15                         | 10            | 12                              | 27                      | 20             | 22             | 24            | 29                                   | 34                   | 17             | 18               | 31                        | 21                     | 33                 | 26                      | 25               | 28                | 32           | 30                       |

| Country            | Tracheal, bronchus, and lung cancer | Colon and rectum cancer | Breast cancer | Non-melanoma skin cancer | Prostate cancer | Stomach cancer | Liver cancer | Cervical cancer | Leukemia | Non-Hodgkin lymphoma | Esophageal cancer | Bladder cancer | Pancreatic cancer | Uterine cancer | Lip and oral cavity cancer | Kidney cancer | Brain and nervous system cancer | Malignant skin melanoma | Ovarian cancer | Thyroid cancer | Larynx cancer | Gallbladder and biliary tract cancer | Other pharynx cancer | Other leukemia | Multiple myeloma | Chronic lymphoid leukemia | Acute myeloid leukemia | Nasopharynx cancer | Acute lymphoid leukemia | Hodgkin lymphoma | Testicular cancer | Mesothelioma | Chronic myeloid leukemia |
|--------------------|-------------------------------------|-------------------------|---------------|--------------------------|-----------------|----------------|--------------|-----------------|----------|----------------------|-------------------|----------------|-------------------|----------------|----------------------------|---------------|---------------------------------|-------------------------|----------------|----------------|---------------|--------------------------------------|----------------------|----------------|------------------|---------------------------|------------------------|--------------------|-------------------------|------------------|-------------------|--------------|--------------------------|
| Kuwait             | 8                                   | 2                       | 1             | 17                       | 3               | 18             | 12           | 19              | 5        | 4                    | 27                | 9              | 14                | 6              | 21                         | 13            | 11                              | 25                      | 15             | 10             | 28            | 29                                   | 31                   | 16             | 23               | 30                        | 22                     | 32                 | 20                      | 26               | 24                | 34           | 33                       |
| Qatar              | 4                                   | 2                       | 1             | 3                        | 5               | 12             | 7            | 19              | 6        | 9                    | 22                | 14             | 13                | 16             | 21                         | 10            | 11                              | 25                      | 17             | 15             | 24            | 30                                   | 33                   | 18             | 26               | 29                        | 20                     | 32                 | 27                      | 28               | 23                | 34           | 31                       |
| Bahrain            | 3                                   | 2                       | 1             | 13                       | 4               | 12             | 16           | 18              | 7        | 9                    | 24                | 5              | 11                | 15             | 20                         | 8             | 17                              | 34                      | 14             | 10             | 23            | 29                                   | 28                   | 19             | 21               | 30                        | 25                     | 26                 | 27                      | 22               | 32                | 31           | 33                       |
| Western Europe     | 5                                   | 2                       | 3             | 4                        | 1               | 9              | 15           | 25              | 12       | 8                    | 20                | 7              | 11                | 13             | 19                         | 14            | 16                              | 10                      | 17             | 21             | 24            | 23                                   | 26                   | 28             | 18               | 22                        | 27                     | 34                 | 33                      | 30               | 29                | 31           | 32                       |
| Germany            | 4                                   | 2                       | 3             | 5                        | 1               | 7              | 15           | 25              | 14       | 8                    | 21                | 11             | 10                | 13             | 18                         | 12            | 17                              | 9                       | 16             | 22             | 27            | 19                                   | 23                   | 30             | 20               | 24                        | 28                     | 33                 | 34                      | 29               | 26                | 31           | 32                       |
| United Kingdom     | 3                                   | 5                       | 4             | 1                        | 2               | 12             | 18           | 25              | 7        | 8                    | 15                | 9              | 13                | 11             | 21                         | 14            | 20                              | 10                      | 16             | 24             | 27            | 31                                   | 28                   | 23             | 17               | 19                        | 22                     | 34                 | 32                      | 29               | 30                | 26           | 33                       |
| France             | 5                                   | 3                       | 2             | 4                        | 1               | 14             | 12           | 25              | 10       | 8                    | 19                | 7              | 11                | 15             | 17                         | 13            | 16                              | 9                       | 18             | 22             | 23            | 28                                   | 20                   | 26             | 21               | 24                        | 27                     | 33                 | 34                      | 30               | 29                | 31           | 32                       |
| Italy              | 4                                   | 2                       | 3             | 5                        | 1               | 7              | 12           | 24              | 15       | 9                    | 26                | 6              | 11                | 10             | 21                         | 13            | 16                              | 14                      | 20             | 17             | 22            | 19                                   | 29                   | 27             | 18               | 23                        | 25                     | 34                 | 33                      | 28               | 30                | 31           | 32                       |
| England            | 3                                   | 5                       | 4             | 1                        | 2               | 13             | 17           | 26              | 7        | 8                    | 14                | 9              | 12                | 11             | 20                         | 15            | 22                              | 10                      | 18             | 24             | 27            | 31                                   | 28                   | 23             | 16               | 19                        | 21                     | 34                 | 32                      | 29               | 30                | 25           | 33                       |
| Spain              | 3                                   | 1                       | 5             | 2                        | 4               | 8              | 13           | 26              | 11       | 9                    | 24                | 6              | 12                | 10             | 18                         | 16            | 15                              | 14                      | 20             | 23             | 17            | 22                                   | 28                   | 25             | 19               | 21                        | 27                     | 32                 | 30                      | 29               | 31                | 34           | 33                       |
| Netherlands        | 4                                   | 2                       | 3             | 5                        | 1               | 10             | 20           | 27              | 11       | 9                    | 16                | 8              | 13                | 12             | 23                         | 14            | 15                              | 7                       | 17             | 18             | 26            | 24                                   | 31                   | 21             | 19               | 30                        | 22                     | 34                 | 32                      | 29               | 25                | 28           | 33                       |
| Belgium            | 3                                   | 4                       | 1             | 5                        | 2               | 11             | 16           | 26              | 10       | 8                    | 19                | 7              | 13                | 12             | 18                         | 14            | 15                              | 9                       | 17             | 21             | 23            | 28                                   | 27                   | 24             | 20               | 22                        | 25                     | 34                 | 33                      | 29               | 31                | 30           | 32                       |
| Greece             | 3                                   | 5                       | 2             | 1                        | 4               | 7              | 12           | 22              | 8        | 17                   | 29                | 6              | 9                 | 13             | 25                         | 14            | 10                              | 15                      | 16             | 26             | 18            | 21                                   | 32                   | 19             | 23               | 24                        | 27                     | 31                 | 33                      | 20               | 28                | 34           | 30                       |
| Portugal           | 5                                   | 1                       | 3             | 4                        | 2               | 6              | 15           | 18              | 14       | 9                    | 19                | 8              | 11                | 10             | 17                         | 16            | 12                              | 13                      | 20             | 24             | 25            | 22                                   | 21                   | 28             | 23               | 26                        | 27                     | 30                 | 34                      | 29               | 31                | 33           | 32                       |
| Sweden             | 5                                   | 3                       | 2             | 4                        | 1               | 14             | 18           | 20              | 13       | 9                    | 22                | 8              | 11                | 10             | 23                         | 15            | 12                              | 6                       | 16             | 24             | 28            | 21                                   | 27                   | 29             | 17               | 19                        | 25                     | 34                 | 32                      | 30               | 26                | 31           | 33                       |
| South East England | 5                                   | 4                       | 3             | 1                        | 2               | 14             | 19           | 26              | 7        | 8                    | 13                | 9              | 12                | 11             | 22                         | 15            | 21                              | 10                      | 17             | 25             | 27            | 31                                   | 29                   | 23             | 16               | 18                        | 20                     | 34                 | 32                      | 28               | 30                | 24           | 33                       |
| Greater London     | 4                                   | 5                       | 3             | 1                        | 2               | 13             | 16           | 28              | 8        | 7                    | 14                | 9              | 12                | 11             | 23                         | 15            | 20                              | 10                      | 19             | 18             | 27            | 32                                   | 26                   | 24             | 17               | 21                        | 22                     | 34                 | 31                      | 25               | 29                | 30           | 33                       |
| Austria            | 4                                   | 3                       | 2             | 12                       | 1               | 6              | 14           | 23              | 11       | 9                    | 25                | 5              | 7                 | 13             | 21                         | 15            | 18                              | 8                       | 16             | 19             | 28            | 20                                   | 24                   | 29             | 22               | 17                        | 26                     | 34                 | 32                      | 30               | 27                | 33           | 31                       |
| Switzerland        | 5                                   | 4                       | 3             | 2                        | 1               | 12             | 15           | 28              | 10       | 8                    | 19                | 9              | 11                | 13             | 17                         | 14            | 16                              | 7                       | 18             | 22             | 26            | 25                                   | 24                   | 33             | 21               | 20                        | 23                     | 34                 | 31                      | 29               | 27                | 30           | 32                       |
| Israel             | 4                                   | 3                       | 1             | 2                        | 5               | 11             | 17           | 21              | 12       | 9                    | 25                | 7              | 6                 | 15             | 22                         | 14            | 13                              | 8                       | 16             | 18             | 24            | 26                                   | 34                   | 28             | 20               | 19                        | 23                     | 31                 | 32                      | 27               | 29                | 30           | 33                       |
| North West England | 2                                   | 4                       | 5             | 1                        | 3               | 11             | 16           | 26              | 8        | 9                    | 14                | 7              | 13                | 12             | 20                         | 15            | 22                              | 10                      | 17             | 28             | 27            | 31                                   | 24                   | 23             | 18               | 19                        | 21                     | 34                 | 32                      | 29               | 30                | 25           | 33                       |
| East of England    | 5                                   | 4                       | 3             | 1                        | 2               | 13             | 19           | 26              | 7        | 8                    | 15                | 9              | 12                | 11             | 20                         | 14            | 22                              | 10                      | 17             | 25             | 28            | 31                                   | 29                   | 23             | 16               | 18                        | 21                     | 34                 | 32                      | 27               | 30                | 24           | 33                       |
| West Midlands      | 3                                   | 4                       | 5             | 1                        | 2               | 12             | 17           | 24              | 8        | 9                    | 14                | 7              | 13                | 10             | 22                         | 15            | 21                              | 11                      | 16             | 25             | 26            | 27                                   | 29                   | 23             | 18               | 19                        | 20                     | 34                 | 32                      | 30               | 31                | 28           | 33                       |
| Denmark            | 3                                   | 2                       | 4             | 7                        | 1               | 15             | 20           | 24              | 8        | 10                   | 18                | 5              | 12                | 13             | 19                         | 14            | 9                               | 6                       | 16             | 23             | 27            | 28                                   | 22                   | 26             | 21               | 17                        | 25                     | 34                 | 33                      | 30               | 29                | 31           | 32                       |
| Finland            | 5                                   | 4                       | 2             | 3                        | 1               | 15             | 17           | 25              | 14       | 6                    | 22                | 13             | 9                 | 12             | 21                         | 11            | 10                              | 8                       | 16             | 19             | 30            | 23                                   | 26                   | 28             | 18               | 20                        | 24                     | 34                 | 32                      | 27               | 29                | 31           | 33                       |

| Country                  | Tracheal, bronchus, and lung cancer | Colon and rectum cancer | Breast cancer | Non-melanoma skin cancer | Prostate cancer | Stomach cancer | Liver cancer | Cervical cancer | Leukemia | Non-Hodgkin lymphoma | Esophageal cancer | Bladder cancer | Pancreatic cancer | Uterine cancer | Lip and oral cavity cancer | Kidney cancer | Brain and nervous system cancer | Malignant skin melanoma | Ovarian cancer | Thyroid cancer | Larynx cancer | Gallbladder and biliary tract cancer | Other pharynx cancer | Other leukemia | Multiple myeloma | Chronic lymphoid leukemia | Acute myeloid leukemia | Nasopharynx cancer | Acute lymphoid leukemia | Hodgkin lymphoma | Testicular cancer | Mesothelioma | Chronic myeloid leukemia |
|--------------------------|-------------------------------------|-------------------------|---------------|--------------------------|-----------------|----------------|--------------|-----------------|----------|----------------------|-------------------|----------------|-------------------|----------------|----------------------------|---------------|---------------------------------|-------------------------|----------------|----------------|---------------|--------------------------------------|----------------------|----------------|------------------|---------------------------|------------------------|--------------------|-------------------------|------------------|-------------------|--------------|--------------------------|
| South West England       | 5                                   | 3                       | 4             | 1                        | 2               | 14             | 19           | 26              | 8        | 7                    | 13                | 9              | 12                | 11             | 21                         | 15            | 22                              | 10                      | 17             | 25             | 27            | 31                                   | 28                   | 23             | 16               | 18                        | 20                     | 34                 | 32                      | 29               | 30                | 24           | 33                       |
| Yorkshire and the Humber | 2                                   | 4                       | 5             | 1                        | 3               | 10             | 17           | 24              | 7        | 9                    | 15                | 8              | 13                | 11             | 21                         | 14            | 20                              | 12                      | 18             | 27             | 26            | 31                                   | 29                   | 23             | 16               | 19                        | 22                     | 34                 | 32                      | 28               | 30                | 25           | 33                       |
| Scotland                 | 1                                   | 4                       | 2             | 5                        | 3               | 12             | 19           | 23              | 7        | 8                    | 13                | 11             | 14                | 15             | 16                         | 10            | 18                              | 6                       | 17             | 29             | 26            | 30                                   | 24                   | 25             | 21               | 20                        | 22                     | 33                 | 32                      | 27               | 28                | 31           | 34                       |
| Norway                   | 5                                   | 2                       | 4             | 3                        | 1               | 15             | 23           | 19              | 11       | 10                   | 22                | 8              | 14                | 12             | 24                         | 13            | 9                               | 6                       | 16             | 21             | 29            | 26                                   | 27                   | 28             | 17               | 18                        | 25                     | 34                 | 32                      | 30               | 20                | 33           | 31                       |
| East Midlands            | 3                                   | 4                       | 5             | 1                        | 2               | 13             | 17           | 24              | 7        | 9                    | 14                | 8              | 12                | 11             | 20                         | 15            | 22                              | 10                      | 18             | 27             | 26            | 30                                   | 29                   | 23             | 16               | 19                        | 21                     | 34                 | 32                      | 28               | 31                | 25           | 33                       |
| Ireland                  | 5                                   | 4                       | 3             | 1                        | 2               | 11             | 20           | 18              | 9        | 8                    | 17                | 10             | 12                | 15             | 23                         | 14            | 13                              | 6                       | 16             | 22             | 25            | 29                                   | 30                   | 28             | 19               | 21                        | 26                     | 34                 | 31                      | 24               | 27                | 32           | 33                       |
| Wales                    | 4                                   | 3                       | 2             | 5                        | 1               | 10             | 20           | 23              | 8        | 9                    | 15                | 11             | 13                | 14             | 22                         | 12            | 17                              | 6                       | 16             | 30             | 27            | 25                                   | 26                   | 31             | 19               | 18                        | 21                     | 34                 | 33                      | 24               | 28                | 29           | 32                       |
| North East England       | 2                                   | 4                       | 5             | 1                        | 3               | 11             | 16           | 25              | 7        | 8                    | 15                | 9              | 13                | 14             | 18                         | 10            | 23                              | 12                      | 20             | 28             | 22            | 30                                   | 27                   | 26             | 17               | 19                        | 24                     | 34                 | 32                      | 29               | 31                | 21           | 33                       |
| Northern Ireland         | 4                                   | 3                       | 2             | 5                        | 1               | 9              | 20           | 24              | 10       | 7                    | 17                | 12             | 13                | 14             | 19                         | 11            | 15                              | 6                       | 16             | 23             | 27            | 28                                   | 30                   | 31             | 18               | 22                        | 26                     | 34                 | 32                      | 21               | 25                | 29           | 33                       |
| Cyprus                   | 5                                   | 3                       | 2             | 4                        | 1               | 12             | 16           | 25              | 8        | 9                    | 30                | 7              | 14                | 10             | 21                         | 17            | 13                              | 11                      | 15             | 19             | 28            | 27                                   | 33                   | 24             | 20               | 18                        | 22                     | 34                 | 29                      | 26               | 23                | 31           | 32                       |
| Luxembourg               | 4                                   | 2                       | 1             | 5                        | 3               | 13             | 16           | 28              | 9        | 8                    | 23                | 10             | 14                | 12             | 21                         | 22            | 11                              | 6                       | 17             | 15             | 24            | 30                                   | 25                   | 18             | 20               | 19                        | 26                     | 34                 | 31                      | 29               | 27                | 33           | 32                       |
| Malta                    | 5                                   | 3                       | 2             | 4                        | 1               | 11             | 19           | 24              | 14       | 9                    | 23                | 6              | 10                | 8              | 18                         | 12            | 16                              | 13                      | 15             | 17             | 21            | 29                                   | 30                   | 33             | 20               | 26                        | 22                     | 31                 | 34                      | 25               | 27                | 28           | 32                       |
| Iceland                  | 3                                   | 4                       | 2             | 5                        | 1               | 14             | 19           | 25              | 13       | 10                   | 18                | 12             | 15                | 16             | 21                         | 11            | 7                               | 8                       | 20             | 9              | 29            | 27                                   | 32                   | 24             | 17               | 22                        | 23                     | 34                 | 28                      | 26               | 30                | 33           | 31                       |
| Andorra                  | 5                                   | 3                       | 2             | 4                        | 1               | 11             | 19           | 24              | 10       | 7                    | 18                | 9              | 13                | 15             | 22                         | 14            | 12                              | 8                       | 16             | 21             | 28            | 27                                   | 30                   | 31             | 20               | 17                        | 23                     | 34                 | 32                      | 26               | 29                | 25           | 33                       |
| Western SSA              | 9                                   | 7                       | 2             | 8                        | 4               | 6              | 1            | 3               | 11       | 10                   | 14                | 17             | 13                | 19             | 18                         | 16            | 12                              | 28                      | 15             | 32             | 25            | 21                                   | 27                   | 24             | 22               | 30                        | 20                     | 31                 | 26                      | 23               | 34                | 33           | 29                       |
| Nigeria                  | 8                                   | 6                       | 1             | 7                        | 3               | 12             | 2            | 4               | 11       | 9                    | 14                | 22             | 15                | 17             | 20                         | 16            | 10                              | 27                      | 13             | 32             | 23            | 21                                   | 29                   | 25             | 24               | 30                        | 19                     | 28                 | 26                      | 18               | 34                | 33           | 31                       |
| Ghana                    | 12                                  | 10                      | 3             | 6                        | 4               | 8              | 2            | 1               | 13       | 5                    | 19                | 18             | 7                 | 16             | 15                         | 14            | 11                              | 29                      | 17             | 33             | 23            | 20                                   | 25                   | 24             | 22               | 28                        | 21                     | 31                 | 27                      | 30               | 34                | 32           | 26                       |
| Cameroon                 | 6                                   | 8                       | 3             | 9                        | 5               | 4              | 1            | 2               | 10       | 11                   | 13                | 16             | 12                | 19             | 18                         | 15            | 14                              | 31                      | 17             | 28             | 22            | 21                                   | 25                   | 24             | 23               | 30                        | 20                     | 32                 | 26                      | 29               | 34                | 33           | 27                       |
| Cote d'Ivoire            | 7                                   | 10                      | 2             | 9                        | 1               | 8              | 4            | 3               | 11       | 5                    | 23                | 15             | 12                | 21             | 14                         | 17            | 16                              | 25                      | 13             | 26             | 20            | 19                                   | 24                   | 27             | 18               | 31                        | 22                     | 32                 | 29                      | 28               | 34                | 33           | 30                       |
| Niger                    | 8                                   | 11                      | 6             | 7                        | 5               | 3              | 2            | 1               | 9        | 10                   | 12                | 16             | 13                | 22             | 17                         | 15            | 14                              | 32                      | 19             | 30             | 25            | 21                                   | 28                   | 20             | 24               | 29                        | 18                     | 31                 | 23                      | 26               | 33                | 34           | 27                       |
| Burkina Faso             | 10                                  | 6                       | 4             | 7                        | 8               | 3              | 2            | 1               | 13       | 9                    | 11                | 17             | 12                | 18             | 20                         | 15            | 14                              | 31                      | 16             | 29             | 24            | 19                                   | 25                   | 22             | 23               | 32                        | 21                     | 30                 | 27                      | 26               | 33                | 34           | 28                       |
| Mali                     | 9                                   | 8                       | 4             | 7                        | 11              | 3              | 1            | 2               | 10       | 12                   | 17                | 6              | 14                | 22             | 20                         | 13            | 15                              | 27                      | 16             | 26             | 28            | 18                                   | 31                   | 21             | 23               | 30                        | 19                     | 32                 | 25                      | 24               | 33                | 34           | 29                       |
| Senegal                  | 6                                   | 9                       | 3             | 5                        | 7               | 4              | 2            | 1               | 10       | 11                   | 13                | 17             | 12                | 19             | 18                         | 15            | 14                              | 31                      | 16             | 30             | 24            | 21                                   | 26                   | 22             | 23               | 29                        | 20                     | 32                 | 25                      | 28               | 34                | 33           | 27                       |
| Chad                     | 7                                   | 10                      | 4             | 8                        | 6               | 3              | 2            | 1               | 9        | 11                   | 13                | 16             | 12                | 20             | 17                         | 15            | 14                              | 32                      | 19             | 31             | 25            | 22                                   | 27                   | 21             | 24               | 29                        | 18                     | 30                 | 23                      | 26               | 33                | 34           | 28                       |
| Guinea                   | 5                                   | 9                       | 3             | 7                        | 8               | 4              | 1            | 2               | 11       | 14                   | 18                | 12             | 13                | 20             | 10                         | 16            | 15                              | 22                      | 17             | 27             | 24            | 19                                   | 23                   | 30             | 25               | 31                        | 21                     | 33                 | 26                      | 28               | 32                | 34           | 29                       |

| Country                    | Tracheal, bronchus, and lung cancer | Colon and rectum cancer | Breast cancer | Non-melanoma skin cancer | Prostate cancer | Stomach cancer | Liver cancer | Cervical cancer | Leukemia | Non-Hodgkin lymphoma | Esophageal cancer | Bladder cancer | Pancreatic cancer | Uterine cancer | Lip and oral cavity cancer | Kidney cancer | Brain and nervous system cancer | Malignant skin melanoma | Ovarian cancer | Thyroid cancer | Larynx cancer | Gallbladder and biliary tract cancer | Other pharynx cancer | Other leukemia | Multiple myeloma | Chronic lymphoid leukemia | Acute myeloid leukemia | Nasopharynx cancer | Acute lymphoid leukemia | Hodgkin lymphoma | Testicular cancer | Mesothelioma | Chronic myeloid leukemia |
|----------------------------|-------------------------------------|-------------------------|---------------|--------------------------|-----------------|----------------|--------------|-----------------|----------|----------------------|-------------------|----------------|-------------------|----------------|----------------------------|---------------|---------------------------------|-------------------------|----------------|----------------|---------------|--------------------------------------|----------------------|----------------|------------------|---------------------------|------------------------|--------------------|-------------------------|------------------|-------------------|--------------|--------------------------|
| Benin                      | 5                                   | 9                       | 3             | 8                        | 6               | 4              | 2            | 1               | 10       | 11                   | 13                | 16             | 12                | 19             | 18                         | 15            | 14                              | 32                      | 17             | 30             | 24            | 21                                   | 26                   | 22             | 23               | 29                        | 20                     | 31                 | 25                      | 28               | 34                | 33           | 27                       |
| Togo                       | 5                                   | 8                       | 3             | 9                        | 6               | 4              | 2            | 1               | 10       | 11                   | 14                | 16             | 12                | 19             | 18                         | 15            | 13                              | 31                      | 17             | 29             | 23            | 21                                   | 27                   | 22             | 24               | 30                        | 20                     | 32                 | 25                      | 28               | 33                | 34           | 26                       |
| Sierra Leone               | 7                                   | 8                       | 3             | 9                        | 6               | 4              | 2            | 1               | 10       | 11                   | 13                | 17             | 12                | 19             | 18                         | 15            | 14                              | 32                      | 16             | 29             | 23            | 21                                   | 26                   | 22             | 24               | 30                        | 20                     | 31                 | 25                      | 28               | 34                | 33           | 27                       |
| Liberia                    | 9                                   | 7                       | 3             | 8                        | 5               | 4              | 1            | 2               | 10       | 13                   | 12                | 17             | 11                | 19             | 18                         | 15            | 14                              | 31                      | 16             | 30             | 24            | 21                                   | 26                   | 22             | 23               | 28                        | 20                     | 32                 | 25                      | 29               | 34                | 33           | 27                       |
| Mauritania                 | 7                                   | 9                       | 3             | 8                        | 4               | 5              | 1            | 2               | 12       | 11                   | 16                | 17             | 10                | 19             | 18                         | 14            | 13                              | 29                      | 15             | 26             | 24            | 21                                   | 27                   | 23             | 22               | 28                        | 20                     | 31                 | 25                      | 32               | 34                | 33           | 30                       |
| The Gambia                 | 6                                   | 8                       | 3             | 5                        | 12              | 9              | 1            | 2               | 11       | 7                    | 17                | 20             | 10                | 19             | 16                         | 15            | 14                              | 31                      | 13             | 25             | 28            | 21                                   | 24                   | 23             | 18               | 30                        | 22                     | 32                 | 26                      | 27               | 34                | 33           | 29                       |
| Guinea-Bissau              | 6                                   | 7                       | 4             | 9                        | 5               | 3              | 2            | 1               | 10       | 12                   | 11                | 15             | 13                | 19             | 17                         | 16            | 14                              | 32                      | 18             | 30             | 22            | 20                                   | 25                   | 23             | 24               | 29                        | 21                     | 31                 | 27                      | 28               | 34                | 33           | 26                       |
| Cape Verde                 | 4                                   | 8                       | 7             | 12                       | 1               | 2              | 5            | 3               | 13       | 16                   | 6                 | 15             | 9                 | 18             | 10                         | 14            | 17                              | 30                      | 21             | 31             | 22            | 25                                   | 24                   | 20             | 23               | 29                        | 19                     | 28                 | 26                      | 33               | 32                | 34           | 27                       |
| Sao Tome and Principe      | 3                                   | 6                       | 5             | 7                        | 8               | 4              | 15           | 2               | 12       | 11                   | 13                | 9              | 10                | 18             | 21                         | 14            | 17                              | 30                      | 16             | 28             | 23            | 19                                   | 27                   | 26             | 22               | 29                        | 20                     | 31                 | 24                      | 33               | 34                | 32           | 25                       |
| Eastern Sub-Saharan Africa | 11                                  | 7                       | 4             | 8                        | 3               | 10             | 6            | 1               | 13       | 5                    | 9                 | 17             | 15                | 19             | 14                         | 18            | 16                              | 24                      | 12             | 20             | 25            | 28                                   | 26                   | 27             | 22               | 32                        | 30                     | 21                 | 29                      | 23               | 34                | 33           | 31                       |
| Ethiopia                   | 10                                  | 7                       | 4             | 8                        | 2               | 9              | 6            | 1               | 15       | 5                    | 12                | 17             | 14                | 18             | 13                         | 19            | 16                              | 24                      | 11             | 21             | 25            | 27                                   | 26                   | 28             | 22               | 32                        | 30                     | 20                 | 29                      | 23               | 34                | 33           | 31                       |
| Tanzania                   | 10                                  | 7                       | 5             | 8                        | 2               | 9              | 6            | 1               | 14       | 4                    | 12                | 18             | 13                | 19             | 17                         | 16            | 15                              | 23                      | 11             | 20             | 24            | 28                                   | 25                   | 27             | 21               | 32                        | 30                     | 22                 | 29                      | 26               | 34                | 33           | 31                       |
| Kenya                      | 12                                  | 7                       | 5             | 2                        | 6               | 4              | 8            | 1               | 11       | 10                   | 9                 | 19             | 13                | 25             | 15                         | 20            | 16                              | 30                      | 14             | 28             | 17            | 24                                   | 26                   | 29             | 21               | 32                        | 23                     | 18                 | 22                      | 27               | 33                | 34           | 31                       |
| Uganda                     | 9                                   | 8                       | 3             | 13                       | 2               | 10             | 6            | 1               | 12       | 5                    | 4                 | 21             | 17                | 18             | 14                         | 16            | 15                              | 25                      | 11             | 22             | 26            | 30                                   | 27                   | 24             | 23               | 32                        | 29                     | 20                 | 28                      | 19               | 33                | 34           | 31                       |
| Mozambique                 | 8                                   | 6                       | 5             | 7                        | 12              | 4              | 2            | 1               | 13       | 14                   | 10                | 18             | 15                | 19             | 16                         | 17            | 11                              | 23                      | 9              | 20             | 24            | 26                                   | 28                   | 25             | 21               | 31                        | 29                     | 32                 | 27                      | 22               | 34                | 33           | 30                       |
| Madagascar                 | 12                                  | 6                       | 4             | 8                        | 3               | 10             | 7            | 1               | 13       | 5                    | 9                 | 19             | 15                | 18             | 14                         | 17            | 16                              | 24                      | 11             | 20             | 25            | 29                                   | 27                   | 26             | 22               | 32                        | 30                     | 21                 | 28                      | 23               | 33                | 34           | 31                       |
| Malawi                     | 12                                  | 9                       | 6             | 11                       | 7               | 13             | 8            | 2               | 15       | 4                    | 3                 | 5              | 17                | 21             | 16                         | 10            | 19                              | 18                      | 14             | 20             | 28            | 24                                   | 29                   | 23             | 22               | 32                        | 27                     | 31                 | 25                      | 26               | 33                | 34           | 30                       |
| Zambia                     | 12                                  | 6                       | 5             | 9                        | 3               | 8              | 7            | 1               | 18       | 4                    | 10                | 17             | 16                | 19             | 13                         | 15            | 14                              | 25                      | 11             | 20             | 23            | 27                                   | 26                   | 28             | 21               | 33                        | 30                     | 22                 | 29                      | 24               | 32                | 34           | 31                       |
| South Sudan                | 11                                  | 7                       | 5             | 10                       | 3               | 9              | 6            | 1               | 13       | 4                    | 8                 | 20             | 14                | 18             | 15                         | 17            | 16                              | 25                      | 12             | 21             | 26            | 28                                   | 27                   | 24             | 23               | 32                        | 30                     | 19                 | 29                      | 22               | 34                | 33           | 31                       |
| Rwanda                     | 12                                  | 7                       | 3             | 8                        | 4               | 11             | 6            | 1               | 14       | 5                    | 10                | 18             | 15                | 19             | 13                         | 17            | 16                              | 23                      | 9              | 20             | 26            | 29                                   | 24                   | 28             | 21               | 32                        | 30                     | 22                 | 27                      | 25               | 34                | 33           | 31                       |
| Burundi                    | 11                                  | 7                       | 4             | 10                       | 3               | 9              | 6            | 1               | 13       | 5                    | 8                 | 19             | 16                | 17             | 14                         | 18            | 15                              | 26                      | 12             | 22             | 25            | 29                                   | 24                   | 27             | 23               | 32                        | 30                     | 21                 | 28                      | 20               | 34                | 33           | 31                       |
| Somalia                    | 13                                  | 6                       | 3             | 10                       | 4               | 7              | 8            | 1               | 12       | 5                    | 9                 | 18             | 15                | 16             | 14                         | 19            | 17                              | 26                      | 11             | 21             | 25            | 28                                   | 27                   | 24             | 23               | 32                        | 30                     | 22                 | 29                      | 20               | 33                | 34           | 31                       |
| Eritrea                    | 12                                  | 6                       | 3             | 8                        | 4               | 9              | 7            | 1               | 13       | 5                    | 10                | 19             | 16                | 17             | 14                         | 18            | 15                              | 24                      | 11             | 20             | 25            | 29                                   | 27                   | 26             | 23               | 32                        | 30                     | 21                 | 28                      | 22               | 34                | 33           | 31                       |
| Djibouti                   | 12                                  | 5                       | 4             | 9                        | 2               | 11             | 7            | 1               | 15       | 6                    | 8                 | 18             | 13                | 19             | 14                         | 16            | 17                              | 23                      | 10             | 21             | 24            | 27                                   | 26                   | 28             | 20               | 32                        | 30                     | 22                 | 29                      | 25               | 34                | 33           | 31                       |
| Comoros                    | 12                                  | 6                       | 4             | 8                        | 2               | 11             | 7            | 1               | 14       | 5                    | 9                 | 18             | 13                | 19             | 15                         | 17            | 16                              | 23                      | 10             | 20             | 25            | 29                                   | 26                   | 28             | 21               | 32                        | 30                     | 22                 | 27                      | 24               | 34                | 33           | 31                       |



| Country                   | Tracheal, bronchus, and lung cancer | Colon and rectum cancer | Breast cancer | Non-melanoma skin cancer | Prostate cancer | Stomach cancer | Liver cancer | Cervical cancer | Leukemia | Non-Hodgkin lymphoma | Esophageal cancer | Bladder cancer | Pancreatic cancer | Uterine cancer | Lip and oral cavity cancer | Kidney cancer | Brain and nervous system cancer | Malignant skin melanoma | Ovarian cancer | Thyroid cancer | Larynx cancer | Gallbladder and biliary tract cancer | Other pharynx cancer | Other leukemia | Multiple myeloma | Chronic lymphoid leukemia | Acute myeloid leukemia | Nasopharynx cancer | Acute lymphoid leukemia | Hodgkin lymphoma | Testicular cancer | Mesothelioma | Chronic myeloid leukemia |
|---------------------------|-------------------------------------|-------------------------|---------------|--------------------------|-----------------|----------------|--------------|-----------------|----------|----------------------|-------------------|----------------|-------------------|----------------|----------------------------|---------------|---------------------------------|-------------------------|----------------|----------------|---------------|--------------------------------------|----------------------|----------------|------------------|---------------------------|------------------------|--------------------|-------------------------|------------------|-------------------|--------------|--------------------------|
| High-income North America | 4                                   | 5                       | 3             | 1                        | 2               | 15             | 16           | 23              | 12       | 6                    | 21                | 11             | 13                | 8              | 17                         | 10            | 18                              | 7                       | 20             | 14             | 24            | 30                                   | 29                   | 26             | 19               | 22                        | 25                     | 34                 | 31                      | 28               | 27                | 32           | 33                       |
| United States             | 4                                   | 5                       | 3             | 1                        | 2               | 16             | 15           | 22              | 12       | 6                    | 21                | 11             | 13                | 8              | 17                         | 10            | 18                              | 7                       | 20             | 14             | 24            | 30                                   | 28                   | 25             | 19               | 23                        | 27                     | 34                 | 31                      | 29               | 26                | 32           | 33                       |
| Canada                    | 2                                   | 4                       | 3             | 6                        | 1               | 11             | 17           | 23              | 9        | 5                    | 21                | 8              | 13                | 12             | 22                         | 14            | 15                              | 10                      | 19             | 18             | 26            | 25                                   | 30                   | 27             | 20               | 16                        | 24                     | 34                 | 31                      | 28               | 29                | 32           | 33                       |
| Central Latin America     | 8                                   | 5                       | 3             | 1                        | 2               | 6              | 10           | 7               | 9        | 15                   | 26                | 18             | 13                | 12             | 22                         | 11            | 16                              | 24                      | 14             | 17             | 23            | 21                                   | 32                   | 28             | 25               | 29                        | 27                     | 33                 | 19                      | 30               | 20                | 34           | 31                       |
| Mexico                    | 8                                   | 5                       | 3             | 1                        | 2               | 6              | 11           | 7               | 10       | 15                   | 27                | 19             | 13                | 12             | 22                         | 9             | 18                              | 23                      | 14             | 17             | 25            | 21                                   | 33                   | 29             | 24               | 30                        | 26                     | 34                 | 20                      | 28               | 16                | 32           | 31                       |
| Colombia                  | 7                                   | 4                       | 3             | 1                        | 2               | 5              | 10           | 8               | 9        | 13                   | 22                | 17             | 11                | 14             | 20                         | 15            | 16                              | 23                      | 12             | 19             | 25            | 18                                   | 32                   | 27             | 24               | 28                        | 26                     | 33                 | 21                      | 30               | 29                | 34           | 31                       |
| Venezuela                 | 6                                   | 5                       | 3             | 2                        | 1               | 8              | 13           | 7               | 11       | 15                   | 24                | 16             | 12                | 9              | 18                         | 10            | 19                              | 27                      | 14             | 20             | 17            | 23                                   | 30                   | 31             | 21               | 29                        | 26                     | 33                 | 22                      | 28               | 25                | 34           | 32                       |
| Guatemala                 | 9                                   | 8                       | 6             | 1                        | 5               | 2              | 4            | 3               | 7        | 17                   | 21                | 22             | 14                | 11             | 19                         | 12            | 15                              | 30                      | 18             | 25             | 26            | 20                                   | 29                   | 13             | 27               | 24                        | 23                     | 28                 | 16                      | 32               | 31                | 34           | 33                       |
| Honduras                  | 9                                   | 7                       | 6             | 1                        | 2               | 3              | 10           | 5               | 4        | 18                   | 29                | 24             | 12                | 8              | 16                         | 20            | 17                              | 31                      | 14             | 32             | 25            | 15                                   | 23                   | 27             | 26               | 21                        | 19                     | 28                 | 11                      | 30               | 34                | 33           | 22                       |
| El Salvador               | 7                                   | 6                       | 4             | 1                        | 3               | 5              | 9            | 2               | 8        | 18                   | 23                | 20             | 12                | 10             | 19                         | 15            | 13                              | 32                      | 14             | 26             | 25            | 17                                   | 27                   | 16             | 24               | 22                        | 29                     | 28                 | 21                      | 30               | 33                | 34           | 31                       |
| Nicaragua                 | 8                                   | 6                       | 4             | 1                        | 3               | 5              | 7            | 2               | 10       | 15                   | 26                | 21             | 12                | 18             | 19                         | 13            | 11                              | 30                      | 14             | 22             | 23            | 16                                   | 32                   | 20             | 27               | 25                        | 24                     | 31                 | 17                      | 33               | 28                | 34           | 29                       |
| Costa Rica                | 7                                   | 3                       | 4             | 2                        | 1               | 5              | 11           | 8               | 9        | 13                   | 27                | 15             | 12                | 10             | 20                         | 14            | 17                              | 19                      | 16             | 21             | 26            | 23                                   | 32                   | 33             | 18               | 28                        | 25                     | 30                 | 22                      | 29               | 24                | 34           | 31                       |
| Panama                    | 8                                   | 3                       | 2             | 6                        | 1               | 5              | 12           | 7               | 10       | 14                   | 26                | 18             | 13                | 9              | 19                         | 11            | 15                              | 24                      | 16             | 17             | 22            | 23                                   | 30                   | 29             | 20               | 28                        | 25                     | 32                 | 21                      | 31               | 27                | 34           | 33                       |
| Tropical Latin America    | 5                                   | 4                       | 3             | 1                        | 2               | 6              | 11           | 8               | 14       | 18                   | 10                | 16             | 9                 | 17             | 13                         | 15            | 12                              | 22                      | 20             | 24             | 19            | 21                                   | 23                   | 27             | 25               | 30                        | 26                     | 33                 | 29                      | 31               | 28                | 32           | 34                       |
| Brazil                    | 5                                   | 4                       | 3             | 1                        | 2               | 6              | 11           | 8               | 14       | 18                   | 10                | 16             | 9                 | 17             | 13                         | 15            | 12                              | 21                      | 20             | 24             | 19            | 22                                   | 23                   | 27             | 25               | 30                        | 26                     | 33                 | 29                      | 31               | 28                | 32           | 34                       |
| Paraguay                  | 5                                   | 4                       | 1             | 9                        | 3               | 7              | 16           | 2               | 8        | 15                   | 13                | 19             | 10                | 11             | 17                         | 12            | 18                              | 26                      | 14             | 20             | 21            | 22                                   | 27                   | 23             | 29               | 30                        | 24                     | 33                 | 25                      | 31               | 28                | 34           | 32                       |
| Eastern Europe            | 3                                   | 1                       | 2             | 7                        | 4               | 5              | 18           | 12              | 13       | 17                   | 22                | 10             | 11                | 6              | 16                         | 8             | 19                              | 14                      | 15             | 20             | 21            | 26                                   | 23                   | 31             | 25               | 24                        | 28                     | 32                 | 29                      | 27               | 30                | 33           | 34                       |
| Russia                    | 3                                   | 1                       | 2             | 8                        | 5               | 6              | 17           | 12              | 14       | 18                   | 22                | 10             | 11                | 4              | 16                         | 7             | 20                              | 13                      | 15             | 19             | 21            | 27                                   | 23                   | 31             | 26               | 24                        | 30                     | 34                 | 28                      | 25               | 29                | 33           | 32                       |
| Ukraine                   | 3                                   | 1                       | 2             | 4                        | 6               | 5              | 22           | 9               | 14       | 19                   | 23                | 7              | 10                | 11             | 15                         | 12            | 17                              | 16                      | 13             | 21             | 18            | 24                                   | 20                   | 27             | 26               | 25                        | 28                     | 30                 | 33                      | 29               | 31                | 32           | 34                       |
| Belarus                   | 3                                   | 1                       | 4             | 2                        | 5               | 6              | 23           | 11              | 9        | 16                   | 24                | 13             | 12                | 8              | 17                         | 7             | 19                              | 14                      | 15             | 20             | 18            | 25                                   | 21                   | 33             | 26               | 22                        | 27                     | 31                 | 28                      | 29               | 30                | 34           | 32                       |
| Moldova                   | 4                                   | 1                       | 3             | 2                        | 6               | 5              | 7            | 9               | 19       | 20                   | 23                | 13             | 8                 | 11             | 15                         | 10            | 16                              | 21                      | 18             | 22             | 14            | 27                                   | 17                   | 24             | 25               | 30                        | 29                     | 26                 | 31                      | 28               | 32                | 33           | 34                       |
| Lithuania                 | 3                                   | 2                       | 4             | 5                        | 1               | 7              | 19           | 20              | 10       | 13                   | 23                | 12             | 11                | 6              | 22                         | 9             | 17                              | 15                      | 14             | 18             | 21            | 27                                   | 25                   | 30             | 24               | 16                        | 26                     | 34                 | 29                      | 28               | 31                | 33           | 32                       |
| Latvia                    | 1                                   | 2                       | 5             | 4                        | 3               | 8              | 19           | 21              | 11       | 13                   | 23                | 9              | 10                | 6              | 20                         | 7             | 16                              | 12                      | 14             | 18             | 22            | 28                                   | 25                   | 30             | 24               | 17                        | 26                     | 34                 | 31                      | 27               | 29                | 33           | 32                       |
| Estonia                   | 4                                   | 2                       | 5             | 3                        | 1               | 6              | 18           | 17              | 9        | 10                   | 25                | 11             | 12                | 7              | 21                         | 8             | 15                              | 13                      | 14             | 20             | 23            | 27                                   | 24                   | 30             | 22               | 19                        | 26                     | 34                 | 29                      | 28               | 31                | 33           | 32                       |
| High-income Asia          | 3                                   | 1                       | 6             | 16                       | 4               | 2              | 5            | 18              | 14       | 9                    | 12                | 11             | 7                 | 15             | 19                         | 17            | 20                              | 27                      | 21             | 13             | 24            | 10                                   | 25                   | 26             | 22               | 31                        | 23                     | 34                 | 28                      | 32               | 29                | 30           | 33                       |

| Country                | Tracheal, bronchus, and lung cancer | Colon and rectum cancer | Breast cancer | Non-melanoma skin cancer | Prostate cancer | Stomach cancer | Liver cancer | Cervical cancer | Leukemia | Non-Hodgkin lymphoma | Esophageal cancer | Bladder cancer | Pancreatic cancer | Uterine cancer | Lip and oral cavity cancer | Kidney cancer | Brain and nervous system cancer | Malignant skin melanoma | Ovarian cancer | Thyroid cancer | Larynx cancer | Gallbladder and biliary tract cancer | Other pharynx cancer | Other leukemia | Multiple myeloma | Chronic lymphoid leukemia | Acute myeloid leukemia | Nasopharynx cancer | Acute lymphoid leukemia | Hodgkin lymphoma | Testicular cancer | Mesothelioma | Chronic myeloid leukemia |  |  |
|------------------------|-------------------------------------|-------------------------|---------------|--------------------------|-----------------|----------------|--------------|-----------------|----------|----------------------|-------------------|----------------|-------------------|----------------|----------------------------|---------------|---------------------------------|-------------------------|----------------|----------------|---------------|--------------------------------------|----------------------|----------------|------------------|---------------------------|------------------------|--------------------|-------------------------|------------------|-------------------|--------------|--------------------------|--|--|
| Pacific                |                                     |                         |               |                          |                 |                |              |                 |          |                      |                   |                |                   |                |                            |               |                                 |                         |                |                |               |                                      |                      |                |                  |                           |                        |                    |                         |                  |                   |              |                          |  |  |
| Japan                  | 3                                   | 1                       | 5             | 14                       | 4               | 2              | 6            | 20              | 13       | 9                    | 12                | 11             | 7                 | 15             | 18                         | 16            | 21                              | 27                      | 19             | 17             | 24            | 10                                   | 25                   | 26             | 22               | 31                        | 23                     | 34                 | 28                      | 32               | 29                | 30           | 33                       |  |  |
| South Korea            | 3                                   | 1                       | 5             | 20                       | 6               | 2              | 4            | 14              | 13       | 11                   | 17                | 12             | 9                 | 18             | 21                         | 16            | 15                              | 26                      | 19             | 7              | 22            | 10                                   | 28                   | 27             | 23               | 29                        | 24                     | 32                 | 25                      | 31               | 33                | 34           | 30                       |  |  |
| Singapore              | 3                                   | 1                       | 2             | 18                       | 4               | 6              | 5            | 16              | 11       | 8                    | 20                | 14             | 10                | 9              | 21                         | 12            | 17                              | 27                      | 15             | 13             | 24            | 23                                   | 29                   | 28             | 25               | 31                        | 22                     | 19                 | 26                      | 30               | 32                | 34           | 33                       |  |  |
| Brunei                 | 3                                   | 2                       | 1             | 18                       | 4               | 5              | 9            | 8               | 10       | 6                    | 30                | 15             | 21                | 17             | 13                         | 16            | 11                              | 27                      | 14             | 12             | 28            | 29                                   | 23                   | 31             | 25               | 33                        | 22                     | 26                 | 20                      | 24               | 19                | 34           | 32                       |  |  |
| Central SSA            | 7                                   | 9                       | 2             | 3                        | 6               | 8              | 4            | 1               | 11       | 12                   | 10                | 17             | 13                | 20             | 15                         | 18            | 14                              | 28                      | 16             | 27             | 24            | 23                                   | 30                   | 19             | 25               | 33                        | 22                     | 29                 | 21                      | 26               | 32                | 34           | 31                       |  |  |
| DRC                    | 8                                   | 9                       | 2             | 3                        | 6               | 7              | 4            | 1               | 10       | 12                   | 11                | 17             | 13                | 20             | 15                         | 19            | 14                              | 29                      | 16             | 27             | 24            | 23                                   | 30                   | 18             | 25               | 33                        | 22                     | 28                 | 21                      | 26               | 32                | 34           | 31                       |  |  |
| Angola                 | 6                                   | 7                       | 2             | 4                        | 8               | 9              | 3            | 1               | 11       | 12                   | 10                | 18             | 13                | 19             | 16                         | 17            | 15                              | 26                      | 14             | 28             | 23            | 25                                   | 29                   | 20             | 24               | 32                        | 21                     | 27                 | 22                      | 30               | 34                | 33           | 31                       |  |  |
| CAR                    | 4                                   | 5                       | 2             | 6                        | 9               | 3              | 7            | 1               | 11       | 12                   | 10                | 15             | 13                | 20             | 14                         | 19            | 17                              | 30                      | 16             | 27             | 21            | 22                                   | 29                   | 18             | 23               | 34                        | 26                     | 28                 | 25                      | 24               | 32                | 33           | 31                       |  |  |
| Congo                  | 7                                   | 6                       | 2             | 5                        | 4               | 10             | 3            | 1               | 12       | 13                   | 9                 | 15             | 11                | 19             | 18                         | 17            | 16                              | 27                      | 14             | 25             | 22            | 24                                   | 28                   | 21             | 20               | 33                        | 23                     | 29                 | 26                      | 30               | 34                | 32           | 31                       |  |  |
| Gabon                  | 8                                   | 5                       | 1             | 6                        | 3               | 11             | 4            | 2               | 17       | 12                   | 9                 | 13             | 10                | 19             | 16                         | 14            | 18                              | 23                      | 15             | 22             | 21            | 25                                   | 27                   | 26             | 20               | 32                        | 24                     | 29                 | 28                      | 30               | 33                | 34           | 31                       |  |  |
| Equatorial Guinea      | 7                                   | 6                       | 1             | 5                        | 3               | 16             | 4            | 2               | 17       | 10                   | 9                 | 14             | 11                | 19             | 15                         | 13            | 18                              | 21                      | 12             | 20             | 23            | 27                                   | 25                   | 26             | 22               | 33                        | 24                     | 29                 | 28                      | 30               | 31                | 34           | 32                       |  |  |
| Central Europe         | 2                                   | 1                       | 4             | 3                        | 5               | 8              | 17           | 14              | 12       | 13                   | 25                | 6              | 10                | 7              | 19                         | 11            | 18                              | 15                      | 16             | 22             | 20            | 23                                   | 24                   | 30             | 27               | 21                        | 28                     | 33                 | 31                      | 29               | 26                | 34           | 32                       |  |  |
| Poland                 | 1                                   | 2                       | 3             | 4                        | 5               | 9              | 23           | 17              | 10       | 13                   | 24                | 6              | 11                | 7              | 19                         | 12            | 16                              | 15                      | 14             | 21             | 20            | 22                                   | 25                   | 31             | 26               | 18                        | 28                     | 34                 | 30                      | 29               | 27                | 33           | 32                       |  |  |
| Romania                | 2                                   | 1                       | 5             | 4                        | 3               | 6              | 11           | 7               | 14       | 18                   | 24                | 8              | 12                | 10             | 15                         | 13            | 17                              | 21                      | 19             | 22             | 16            | 25                                   | 20                   | 30             | 27               | 23                        | 28                     | 32                 | 31                      | 29               | 26                | 34           | 33                       |  |  |
| Czech Republic         | 4                                   | 2                       | 5             | 1                        | 3               | 13             | 18           | 19              | 8        | 14                   | 23                | 7              | 11                | 12             | 20                         | 6             | 21                              | 10                      | 16             | 22             | 27            | 17                                   | 25                   | 29             | 24               | 15                        | 28                     | 34                 | 31                      | 30               | 26                | 33           | 32                       |  |  |
| Hungary                | 2                                   | 1                       | 4             | 3                        | 5               | 10             | 20           | 18              | 12       | 15                   | 24                | 6              | 7                 | 9              | 13                         | 8             | 21                              | 14                      | 17             | 25             | 19            | 23                                   | 16                   | 29             | 27               | 22                        | 28                     | 32                 | 30                      | 31               | 26                | 34           | 33                       |  |  |
| Serbia                 | 1                                   | 2                       | 3             | 4                        | 5               | 9              | 14           | 11              | 16       | 17                   | 25                | 6              | 10                | 8              | 20                         | 12            | 13                              | 15                      | 19             | 22             | 18            | 21                                   | 24                   | 30             | 29               | 26                        | 27                     | 32                 | 31                      | 28               | 23                | 34           | 33                       |  |  |
| Bulgaria               | 4                                   | 1                       | 2             | 3                        | 5               | 7              | 13           | 10              | 14       | 11                   | 26                | 8              | 9                 | 6              | 20                         | 16            | 15                              | 19                      | 17             | 21             | 18            | 24                                   | 22                   | 30             | 29               | 25                        | 28                     | 33                 | 31                      | 27               | 23                | 34           | 32                       |  |  |
| Slovakia               | 2                                   | 1                       | 3             | 4                        | 5               | 7              | 20           | 15              | 9        | 12                   | 25                | 10             | 11                | 8              | 21                         | 6             | 22                              | 13                      | 18             | 26             | 27            | 17                                   | 19                   | 31             | 23               | 16                        | 28                     | 32                 | 30                      | 29               | 24                | 34           | 33                       |  |  |
| Croatia                | 2                                   | 1                       | 3             | 5                        | 4               | 6              | 16           | 18              | 13       | 14                   | 26                | 8              | 10                | 7              | 19                         | 9             | 12                              | 15                      | 17             | 22             | 23            | 21                                   | 24                   | 30             | 25               | 20                        | 27                     | 34                 | 32                      | 28               | 29                | 31           | 33                       |  |  |
| Bosnia and Herzegovina | 1                                   | 2                       | 4             | 3                        | 5               | 6              | 8            | 14              | 16       | 20                   | 22                | 9              | 7                 | 13             | 21                         | 10            | 11                              | 19                      | 15             | 24             | 18            | 17                                   | 25                   | 30             | 26               | 23                        | 27                     | 33                 | 31                      | 29               | 28                | 34           | 32                       |  |  |
| Albania                | 1                                   | 6                       | 4             | 2                        | 3               | 5              | 8            | 14              | 12       | 19                   | 21                | 22             | 10                | 13             | 18                         | 11            | 9                               | 23                      | 17             | 20             | 15            | 24                                   | 25                   | 16             | 26               | 33                        | 29                     | 30                 | 31                      | 27               | 28                | 32           | 34                       |  |  |
| Macedonia              | 1                                   | 3                       | 2             | 4                        | 5               | 6              | 10           | 14              | 17       | 19                   | 25                | 8              | 9                 | 7              | 20                         | 18            | 13                              | 12                      | 16             | 21             | 15            | 22                                   | 26                   | 30             | 28               | 23                        | 29                     | 33                 | 31                      | 27               | 24                | 34           | 32                       |  |  |
| Slovenia               | 3                                   | 1                       | 4             | 5                        | 2               | 7              | 16           | 21              | 9        | 6                    | 24                | 14             | 12                | 11             | 20                         | 13            | 22                              | 8                       | 18             | 25             | 27            | 19                                   | 17                   | 29             | 23               | 15                        | 28                     | 34                 | 30                      | 31               | 26                | 33           | 32                       |  |  |

| Country                | Tracheal, bronchus, and lung cancer | Colon and rectum cancer | Breast cancer | Non-melanoma skin cancer | Prostate cancer | Stomach cancer | Liver cancer | Cervical cancer | Leukemia | Non-Hodgkin lymphoma | Esophageal cancer | Bladder cancer | Pancreatic cancer | Uterine cancer | Lip and oral cavity cancer | Kidney cancer | Brain and nervous system cancer | Malignant skin melanoma | Ovarian cancer | Thyroid cancer | Larynx cancer | Gallbladder and biliary tract cancer | Other pharynx cancer | Other leukemia | Multiple myeloma | Chronic lymphoid leukemia | Acute myeloid leukemia | Nasopharynx cancer | Acute lymphoid leukemia | Hodgkin lymphoma | Testicular cancer | Mesothelioma | Chronic myeloid leukemia |
|------------------------|-------------------------------------|-------------------------|---------------|--------------------------|-----------------|----------------|--------------|-----------------|----------|----------------------|-------------------|----------------|-------------------|----------------|----------------------------|---------------|---------------------------------|-------------------------|----------------|----------------|---------------|--------------------------------------|----------------------|----------------|------------------|---------------------------|------------------------|--------------------|-------------------------|------------------|-------------------|--------------|--------------------------|
| Montenegro             | 1                                   | 4                       | 2             | 3                        | 5               | 9              | 12           | 14              | 13       | 19                   | 23                | 7              | 6                 | 10             | 20                         | 15            | 11                              | 17                      | 16             | 18             | 8             | 24                                   | 28                   | 32             | 29               | 22                        | 27                     | 34                 | 30                      | 25               | 26                | 33           | 31                       |
| Central Asia           | 3                                   | 5                       | 2             | 1                        | 11              | 4              | 7            | 6               | 13       | 19                   | 9                 | 16             | 15                | 10             | 18                         | 12            | 14                              | 23                      | 17             | 21             | 20            | 26                                   | 25                   | 22             | 32               | 30                        | 24                     | 31                 | 27                      | 28               | 29                | 34           | 33                       |
| Uzbekistan             | 5                                   | 6                       | 2             | 1                        | 16              | 3              | 8            | 4               | 10       | 15                   | 12                | 17             | 18                | 11             | 14                         | 13            | 7                               | 28                      | 19             | 29             | 20            | 32                                   | 22                   | 23             | 31               | 27                        | 21                     | 26                 | 24                      | 25               | 30                | 34           | 33                       |
| Kazakhstan             | 3                                   | 4                       | 2             | 1                        | 9               | 5              | 11           | 6               | 16       | 21                   | 8                 | 15             | 12                | 7              | 17                         | 10            | 18                              | 22                      | 14             | 19             | 20            | 24                                   | 23                   | 31             | 30               | 26                        | 25                     | 32                 | 27                      | 28               | 29                | 34           | 33                       |
| Azerbaijan             | 3                                   | 5                       | 2             | 1                        | 6               | 4              | 7            | 9               | 12       | 21                   | 8                 | 15             | 16                | 13             | 22                         | 11            | 14                              | 25                      | 17             | 20             | 18            | 23                                   | 29                   | 19             | 31               | 30                        | 26                     | 32                 | 28                      | 27               | 24                | 34           | 33                       |
| Tajikistan             | 6                                   | 9                       | 3             | 1                        | 15              | 2              | 7            | 11              | 8        | 18                   | 4                 | 17             | 14                | 20             | 16                         | 12            | 10                              | 25                      | 13             | 29             | 24            | 23                                   | 26                   | 19             | 31               | 27                        | 22                     | 30                 | 21                      | 28               | 32                | 34           | 33                       |
| Kyrgyzstan             | 4                                   | 7                       | 3             | 1                        | 16              | 2              | 6            | 5               | 10       | 19                   | 14                | 18             | 12                | 15             | 17                         | 9             | 13                              | 26                      | 11             | 22             | 23            | 25                                   | 24                   | 21             | 31               | 28                        | 20                     | 29                 | 27                      | 32               | 30                | 34           | 33                       |
| Turkmenistan           | 5                                   | 8                       | 2             | 1                        | 14              | 4              | 10           | 3               | 12       | 21                   | 6                 | 17             | 20                | 19             | 13                         | 9             | 11                              | 28                      | 15             | 18             | 24            | 25                                   | 22                   | 23             | 29               | 32                        | 27                     | 31                 | 30                      | 26               | 16                | 34           | 33                       |
| Georgia                | 3                                   | 5                       | 2             | 1                        | 7               | 4              | 11           | 9               | 13       | 19                   | 21                | 8              | 14                | 6              | 16                         | 12            | 18                              | 20                      | 17             | 22             | 15            | 23                                   | 27                   | 24             | 30               | 28                        | 29                     | 32                 | 31                      | 25               | 26                | 33           | 34                       |
| Armenia                | 3                                   | 4                       | 2             | 1                        | 6               | 5              | 8            | 11              | 14       | 18                   | 22                | 7              | 10                | 12             | 19                         | 16            | 13                              | 26                      | 15             | 21             | 17            | 23                                   | 29                   | 20             | 28               | 25                        | 24                     | 34                 | 27                      | 31               | 32                | 30           | 33                       |
| Mongolia               | 4                                   | 8                       | 7             | 3                        | 17              | 2              | 1            | 6               | 14       | 18                   | 5                 | 20             | 12                | 11             | 15                         | 10            | 13                              | 31                      | 16             | 22             | 21            | 19                                   | 26                   | 30             | 27               | 25                        | 23                     | 29                 | 24                      | 32               | 34                | 33           | 28                       |
| Southern SSA           | 5                                   | 6                       | 3             | 1                        | 4               | 10             | 9            | 2               | 12       | 16                   | 7                 | 11             | 13                | 18             | 14                         | 17            | 19                              | 21                      | 15             | 23             | 20            | 26                                   | 27                   | 22             | 24               | 34                        | 25                     | 31                 | 30                      | 29               | 32                | 28           | 33                       |
| South Africa           | 5                                   | 6                       | 3             | 1                        | 4               | 14             | 9            | 2               | 10       | 18                   | 8                 | 12             | 13                | 17             | 11                         | 16            | 21                              | 20                      | 15             | 23             | 19            | 26                                   | 28                   | 22             | 24               | 34                        | 25                     | 30                 | 31                      | 29               | 32                | 27           | 33                       |
| Zimbabwe               | 8                                   | 7                       | 3             | 12                       | 2               | 6              | 4            | 1               | 15       | 9                    | 5                 | 11             | 14                | 16             | 19                         | 18            | 17                              | 23                      | 13             | 21             | 22            | 27                                   | 31                   | 25             | 20               | 32                        | 24                     | 29                 | 26                      | 28               | 33                | 34           | 30                       |
| Namibia                | 8                                   | 6                       | 1             | 3                        | 4               | 14             | 12           | 5               | 10       | 9                    | 20                | 17             | 13                | 21             | 7                          | 18            | 16                              | 11                      | 15             | 23             | 19            | 27                                   | 22                   | 28             | 25               | 34                        | 24                     | 30                 | 29                      | 31               | 33                | 26           | 32                       |
| Botswana               | 5                                   | 8                       | 2             | 4                        | 3               | 11             | 9            | 1               | 12       | 18                   | 7                 | 14             | 13                | 17             | 10                         | 16            | 20                              | 21                      | 15             | 23             | 19            | 26                                   | 27                   | 22             | 24               | 34                        | 25                     | 28                 | 30                      | 31               | 32                | 29           | 33                       |
| Lesotho                | 2                                   | 8                       | 3             | 4                        | 5               | 9              | 10           | 1               | 11       | 21                   | 6                 | 14             | 13                | 19             | 12                         | 18            | 20                              | 24                      | 17             | 28             | 15            | 23                                   | 32                   | 16             | 22               | 34                        | 25                     | 27                 | 30                      | 29               | 33                | 26           | 31                       |
| Swaziland              | 2                                   | 8                       | 4             | 3                        | 5               | 10             | 9            | 1               | 12       | 20                   | 6                 | 16             | 13                | 21             | 11                         | 14            | 17                              | 23                      | 15             | 26             | 18            | 25                                   | 29                   | 19             | 22               | 33                        | 24                     | 27                 | 28                      | 31               | 34                | 30           | 32                       |
| Southern Latin America | 4                                   | 3                       | 1             | 6                        | 2               | 5              | 17           | 7               | 15       | 13                   | 16                | 12             | 10                | 14             | 22                         | 8             | 21                              | 20                      | 19             | 24             | 23            | 11                                   | 31                   | 26             | 25               | 28                        | 27                     | 34                 | 30                      | 29               | 18                | 32           | 33                       |
| Argentina              | 4                                   | 2                       | 1             | 6                        | 3               | 7              | 17           | 5               | 14       | 15                   | 16                | 11             | 10                | 13             | 20                         | 8             | 22                              | 21                      | 18             | 24             | 23            | 12                                   | 31                   | 25             | 26               | 28                        | 27                     | 34                 | 30                      | 29               | 19                | 32           | 33                       |
| Chile                  | 5                                   | 3                       | 2             | 6                        | 1               | 4              | 15           | 8               | 17       | 13                   | 18                | 12             | 11                | 16             | 24                         | 9             | 23                              | 21                      | 19             | 20             | 25            | 7                                    | 31                   | 27             | 22               | 29                        | 26                     | 34                 | 28                      | 30               | 14                | 33           | 32                       |
| Uruguay                | 4                                   | 3                       | 1             | 5                        | 2               | 6              | 23           | 9               | 14       | 13                   | 15                | 10             | 8                 | 16             | 18                         | 7             | 21                              | 20                      | 17             | 26             | 19            | 12                                   | 28                   | 25             | 22               | 24                        | 29                     | 32                 | 33                      | 30               | 27                | 34           | 31                       |
| Andean Latin America   | 7                                   | 4                       | 6             | 1                        | 3               | 2              | 8            | 5               | 10       | 12                   | 26                | 21             | 14                | 11             | 20                         | 13            | 15                              | 25                      | 17             | 18             | 27            | 16                                   | 28                   | 19             | 23               | 31                        | 24                     | 34                 | 22                      | 30               | 29                | 33           | 32                       |
| Peru                   | 7                                   | 4                       | 5             | 2                        | 1               | 3              | 8            | 6               | 10       | 13                   | 26                | 21             | 14                | 11             | 19                         | 12            | 15                              | 25                      | 17             | 18             | 27            | 16                                   | 28                   | 20             | 22               | 30                        | 24                     | 34                 | 23                      | 31               | 29                | 33           | 32                       |
| Ecuador                | 8                                   | 4                       | 5             | 1                        | 2               | 3              | 9            | 6               | 10       | 12                   | 26                | 22             | 14                | 11             | 20                         | 13            | 15                              | 25                      | 17             | 16             | 27            | 18                                   | 29                   | 21             | 24               | 32                        | 23                     | 33                 | 19                      | 30               | 28                | 34           | 31                       |



| Country                          | Tracheal, bronchus, and lung cancer | Colon and rectum cancer | Breast cancer | Non-melanoma skin cancer | Prostate cancer | Stomach cancer | Liver cancer | Cervical cancer | Leukemia | Non-Hodgkin lymphoma | Esophageal cancer | Bladder cancer | Pancreatic cancer | Uterine cancer | Lip and oral cavity cancer | Kidney cancer | Brain and nervous system cancer | Malignant skin melanoma | Ovarian cancer | Thyroid cancer | Larynx cancer | Gallbladder and biliary tract cancer | Other pharynx cancer | Other leukemia | Multiple myeloma | Chronic lymphoid leukemia | Acute myeloid leukemia | Nasopharynx cancer | Acute lymphoid leukemia | Hodgkin lymphoma | Testicular cancer | Mesothelioma | Chronic myeloid leukemia |
|----------------------------------|-------------------------------------|-------------------------|---------------|--------------------------|-----------------|----------------|--------------|-----------------|----------|----------------------|-------------------|----------------|-------------------|----------------|----------------------------|---------------|---------------------------------|-------------------------|----------------|----------------|---------------|--------------------------------------|----------------------|----------------|------------------|---------------------------|------------------------|--------------------|-------------------------|------------------|-------------------|--------------|--------------------------|
| Bolivia                          | 7                                   | 5                       | 6             | 2                        | 3               | 1              | 9            | 4               | 8        | 12                   | 23                | 20             | 13                | 11             | 21                         | 15            | 16                              | 25                      | 18             | 17             | 27            | 14                                   | 28                   | 19             | 24               | 32                        | 26                     | 34                 | 22                      | 30               | 29                | 33           | 31                       |
| Caribbean                        | 4                                   | 2                       | 3             | 6                        | 1               | 9              | 11           | 8               | 10       | 13                   | 20                | 12             | 14                | 7              | 16                         | 17            | 18                              | 25                      | 19             | 23             | 15            | 26                                   | 24                   | 22             | 21               | 29                        | 28                     | 31                 | 30                      | 27               | 33                | 34           | 32                       |
| Cuba                             | 2                                   | 3                       | 4             | 7                        | 1               | 10             | 15           | 11              | 17       | 14                   | 16                | 9              | 13                | 6              | 12                         | 18            | 19                              | 24                      | 20             | 22             | 8             | 27                                   | 23                   | 30             | 21               | 26                        | 28                     | 31                 | 33                      | 25               | 32                | 34           | 29                       |
| Haiti                            | 5                                   | 6                       | 2             | 8                        | 3               | 4              | 11           | 1               | 7        | 12                   | 19                | 20             | 14                | 13             | 15                         | 16            | 18                              | 32                      | 17             | 29             | 22            | 21                                   | 27                   | 10             | 23               | 31                        | 26                     | 28                 | 24                      | 25               | 34                | 33           | 30                       |
| Dominican Republic               | 5                                   | 3                       | 2             | 4                        | 1               | 9              | 8            | 7               | 10       | 16                   | 21                | 18             | 13                | 12             | 11                         | 17            | 14                              | 29                      | 19             | 24             | 20            | 27                                   | 22                   | 15             | 23               | 30                        | 26                     | 25                 | 28                      | 31               | 33                | 34           | 32                       |
| Jamaica                          | 4                                   | 3                       | 2             | 11                       | 1               | 7              | 15           | 5               | 9        | 10                   | 19                | 13             | 14                | 8              | 22                         | 17            | 23                              | 25                      | 12             | 21             | 20            | 24                                   | 29                   | 16             | 18               | 27                        | 26                     | 28                 | 30                      | 32               | 33                | 34           | 31                       |
| Trinidad and Tobago              | 7                                   | 3                       | 2             | 19                       | 1               | 9              | 15           | 6               | 12       | 11                   | 23                | 14             | 10                | 5              | 17                         | 13            | 20                              | 27                      | 8              | 18             | 21            | 25                                   | 26                   | 22             | 16               | 33                        | 24                     | 32                 | 30                      | 28               | 29                | 34           | 31                       |
| Guyana                           | 8                                   | 4                       | 2             | 6                        | 1               | 10             | 12           | 3               | 11       | 15                   | 23                | 18             | 14                | 7              | 16                         | 13            | 19                              | 26                      | 9              | 20             | 22            | 24                                   | 30                   | 17             | 21               | 29                        | 32                     | 31                 | 25                      | 27               | 34                | 33           | 28                       |
| Suriname                         | 5                                   | 2                       | 3             | 7                        | 1               | 9              | 8            | 4               | 10       | 12                   | 26                | 18             | 11                | 16             | 19                         | 15            | 13                              | 25                      | 14             | 21             | 24            | 23                                   | 29                   | 17             | 20               | 30                        | 27                     | 22                 | 31                      | 28               | 33                | 34           | 32                       |
| The Bahamas                      | 7                                   | 3                       | 2             | 9                        | 1               | 8              | 16           | 6               | 11       | 10                   | 19                | 21             | 17                | 5              | 14                         | 15            | 23                              | 22                      | 12             | 20             | 18            | 24                                   | 25                   | 26             | 13               | 27                        | 28                     | 30                 | 32                      | 29               | 34                | 33           | 31                       |
| Belize                           | 4                                   | 5                       | 3             | 6                        | 2               | 8              | 9            | 1               | 10       | 16                   | 21                | 18             | 12                | 11             | 17                         | 13            | 15                              | 26                      | 19             | 25             | 20            | 22                                   | 28                   | 14             | 23               | 32                        | 30                     | 29                 | 24                      | 27               | 34                | 31           | 33                       |
| Barbados                         | 9                                   | 3                       | 2             | 8                        | 1               | 6              | 18           | 7               | 11       | 10                   | 19                | 16             | 12                | 5              | 20                         | 14            | 23                              | 27                      | 17             | 15             | 22            | 24                                   | 25                   | 21             | 13               | 28                        | 26                     | 31                 | 32                      | 29               | 34                | 33           | 30                       |
| Saint Lucia                      | 6                                   | 3                       | 2             | 8                        | 1               | 7              | 17           | 4               | 11       | 10                   | 21                | 13             | 12                | 9              | 14                         | 19            | 23                              | 24                      | 16             | 18             | 20            | 27                                   | 28                   | 22             | 15               | 25                        | 29                     | 26                 | 32                      | 30               | 31                | 34           | 33                       |
| Saint Vincent and the Grenadines | 7                                   | 3                       | 2             | 6                        | 1               | 9              | 13           | 4               | 11       | 10                   | 22                | 16             | 14                | 8              | 12                         | 19            | 20                              | 24                      | 15             | 23             | 17            | 26                                   | 25                   | 18             | 21               | 27                        | 28                     | 29                 | 32                      | 30               | 34                | 33           | 31                       |
| Grenada                          | 6                                   | 3                       | 2             | 9                        | 1               | 10             | 13           | 4               | 11       | 7                    | 18                | 16             | 12                | 8              | 14                         | 22            | 19                              | 24                      | 15             | 17             | 23            | 25                                   | 27                   | 21             | 20               | 26                        | 28                     | 29                 | 30                      | 32               | 34                | 33           | 31                       |
| Antigua and Barbuda              | 8                                   | 3                       | 2             | 5                        | 1               | 6              | 13           | 7               | 10       | 11                   | 24                | 16             | 14                | 9              | 20                         | 18            | 22                              | 21                      | 12             | 15             | 23            | 25                                   | 26                   | 17             | 19               | 33                        | 27                     | 28                 | 29                      | 30               | 31                | 34           | 32                       |
| Dominica                         | 6                                   | 3                       | 2             | 8                        | 1               | 5              | 13           | 7               | 11       | 9                    | 20                | 15             | 12                | 10             | 16                         | 17            | 24                              | 26                      | 21             | 28             | 19            | 22                                   | 23                   | 18             | 14               | 31                        | 25                     | 30                 | 27                      | 29               | 34                | 33           | 32                       |
| Australasia                      | 6                                   | 3                       | 5             | 1                        | 2               | 10             | 16           | 26              | 8        | 9                    | 22                | 11             | 12                | 14             | 18                         | 13            | 21                              | 4                       | 23             | 19             | 30            | 29                                   | 31                   | 32             | 17               | 15                        | 20                     | 34                 | 24                      | 28               | 27                | 25           | 33                       |
| Australia                        | 6                                   | 3                       | 5             | 1                        | 2               | 10             | 16           | 26              | 9        | 7                    | 22                | 11             | 12                | 14             | 18                         | 13            | 21                              | 4                       | 23             | 19             | 29            | 30                                   | 31                   | 33             | 17               | 15                        | 20                     | 34                 | 24                      | 28               | 27                | 25           | 32                       |
| New Zealand                      | 6                                   | 3                       | 4             | 1                        | 2               | 11             | 19           | 25              | 8        | 9                    | 17                | 14             | 13                | 12             | 20                         | 10            | 21                              | 5                       | 22             | 23             | 31            | 26                                   | 32                   | 28             | 16               | 15                        | 18                     | 34                 | 24                      | 29               | 27                | 30           | 33                       |
| Oceania                          | 3                                   | 5                       | 2             | 12                       | 7               | 4              | 9            | 1               | 8        | 13                   | 24                | 18             | 14                | 10             | 11                         | 22            | 20                              | 32                      | 16             | 21             | 25            | 29                                   | 23                   | 15             | 28               | 33                        | 17                     | 19                 | 27                      | 30               | 31                | 34           | 26                       |
| Papua New Guinea                 | 3                                   | 6                       | 2             | 12                       | 9               | 4              | 8            | 1               | 5        | 14                   | 24                | 21             | 15                | 10             | 11                         | 22            | 19                              | 31                      | 17             | 29             | 23            | 27                                   | 20                   | 13             | 28               | 34                        | 18                     | 16                 | 26                      | 30               | 32                | 33           | 25                       |
| Fiji                             | 10                                  | 4                       | 1             | 15                       | 3               | 12             | 7            | 2               | 8        | 17                   | 20                | 13             | 16                | 6              | 11                         | 21            | 22                              | 30                      | 18             | 9              | 23            | 27                                   | 24                   | 25             | 26               | 33                        | 14                     | 32                 | 29                      | 28               | 19                | 34           | 31                       |
| Solomon Islands                  | 3                                   | 6                       | 2             | 10                       | 9               | 5              | 4            | 1               | 7        | 14                   | 22                | 21             | 13                | 11             | 12                         | 20            | 19                              | 31                      | 16             | 29             | 24            | 28                                   | 23                   | 15             | 27               | 33                        | 17                     | 18                 | 26                      | 30               | 32                | 34           | 25                       |

| Country                        | Tracheal, bronchus, and lung cancer | Colon and rectum cancer | Breast cancer | Non-melanoma skin cancer | Prostate cancer | Stomach cancer | Liver cancer | Cervical cancer | Leukemia | Non-Hodgkin lymphoma | Esophageal cancer | Bladder cancer | Pancreatic cancer | Uterine cancer | Lip and oral cavity cancer | Kidney cancer | Brain and nervous system cancer | Malignant skin melanoma | Ovarian cancer | Thyroid cancer | Larynx cancer | Gallbladder and biliary tract cancer | Other pharynx cancer | Other leukemia | Multiple myeloma | Chronic lymphoid leukemia | Acute myeloid leukemia | Nasopharynx cancer | Acute lymphoid leukemia | Hodgkin lymphoma | Testicular cancer | Mesothelioma | Chronic myeloid leukemia |
|--------------------------------|-------------------------------------|-------------------------|---------------|--------------------------|-----------------|----------------|--------------|-----------------|----------|----------------------|-------------------|----------------|-------------------|----------------|----------------------------|---------------|---------------------------------|-------------------------|----------------|----------------|---------------|--------------------------------------|----------------------|----------------|------------------|---------------------------|------------------------|--------------------|-------------------------|------------------|-------------------|--------------|--------------------------|
| Vanuatu                        | 3                                   | 5                       | 1             | 10                       | 7               | 4              | 9            | 2               | 8        | 14                   | 22                | 20             | 13                | 11             | 12                         | 21            | 19                              | 31                      | 15             | 29             | 24            | 28                                   | 23                   | 16             | 26               | 33                        | 17                     | 18                 | 25                      | 30               | 32                | 34           | 27                       |
| Samoa                          | 7                                   | 3                       | 1             | 6                        | 5               | 4              | 9            | 2               | 10       | 14                   | 26                | 18             | 12                | 11             | 17                         | 19            | 16                              | 20                      | 13             | 15             | 29            | 27                                   | 25                   | 22             | 24               | 33                        | 23                     | 21                 | 30                      | 32               | 28                | 34           | 31                       |
| Kiribati                       | 3                                   | 8                       | 2             | 10                       | 13              | 6              | 4            | 7               | 9        | 11                   | 15                | 25             | 14                | 23             | 1                          | 12            | 16                              | 31                      | 17             | 32             | 24            | 28                                   | 22                   | 18             | 29               | 33                        | 20                     | 21                 | 27                      | 30               | 19                | 34           | 26                       |
| Tonga                          | 3                                   | 8                       | 1             | 7                        | 5               | 6              | 2            | 4               | 11       | 9                    | 21                | 17             | 12                | 13             | 10                         | 16            | 15                              | 29                      | 18             | 26             | 23            | 27                                   | 25                   | 24             | 20               | 31                        | 19                     | 22                 | 28                      | 32               | 33                | 34           | 30                       |
| Federated States of Micronesia | 2                                   | 4                       | 1             | 11                       | 5               | 6              | 8            | 3               | 9        | 14                   | 24                | 16             | 13                | 10             | 12                         | 19            | 18                              | 30                      | 15             | 25             | 22            | 29                                   | 23                   | 20             | 26               | 33                        | 17                     | 21                 | 28                      | 32               | 31                | 34           | 27                       |
| Marshall Islands               | 3                                   | 4                       | 1             | 12                       | 9               | 5              | 6            | 2               | 8        | 13                   | 22                | 19             | 14                | 10             | 11                         | 16            | 18                              | 30                      | 17             | 25             | 24            | 29                                   | 23                   | 20             | 26               | 33                        | 15                     | 21                 | 27                      | 31               | 32                | 34           | 28                       |

Colors correspond to the ranking, with dark red as the most common cancer and dark green as the least common cancer for the location indicated. Rankings do not include the "other cancer" group. The numbers inside each box indicate the ranking. Abbreviations: SSA: Sub-Saharan Africa; DRC: Democratic Republic of Congo; CAR: Central African Republic

Figure 15: Cancer ranking by total incidence based on global level for developing and developed regions and all countries, both sexes, 2016

| Country         | Tracheal, bronchus, and lung cancer | Stomach cancer | Colon and rectum cancer | Liver cancer | Breast cancer | Esophageal cancer | Pancreatic cancer | Prostate cancer | Leukemia | Cervical cancer | Non-Hodgkin lymphoma | Brain and nervous system cancer | Bladder cancer | Lip and oral cavity cancer | Ovarian cancer | Gallbladder and biliary tract cancer | Kidney cancer | Other pharynx cancer | Other leukemia | Larynx cancer | Multiple myeloma | Uterine cancer | Acute myeloid leukemia | Nasopharynx cancer | Malignant skin melanoma | Non-melanoma skin cancer | Acute lymphoid leukemia | Thyroid cancer | Chronic lymphoid leukemia | Mesothelioma | Hodgkin lymphoma | Chronic myeloid leukemia | Testicular cancer |
|-----------------|-------------------------------------|----------------|-------------------------|--------------|---------------|-------------------|-------------------|-----------------|----------|-----------------|----------------------|---------------------------------|----------------|----------------------------|----------------|--------------------------------------|---------------|----------------------|----------------|---------------|------------------|----------------|------------------------|--------------------|-------------------------|--------------------------|-------------------------|----------------|---------------------------|--------------|------------------|--------------------------|-------------------|
| Global          | 1                                   | 2              | 3                       | 4            | 5             | 7                 | 8                 | 9               | 10       | 11              | 12                   | 13                              | 14             | 15                         | 16             | 17                                   | 18            | 19                   | 20             | 21            | 22               | 23             | 24                     | 25                 | 26                      | 27                       | 28                      | 29             | 30                        | 31           | 32               | 33                       | 34                |
| High SDI        | 1                                   | 5              | 2                       | 7            | 4             | 12                | 3                 | 6               | 9        | 21              | 10                   | 15                              | 11             | 20                         | 14             | 16                                   | 13            | 25                   | 22             | 26            | 17               | 23             | 18                     | 30                 | 19                      | 28                       | 32                      | 29             | 24                        | 27           | 33               | 31                       | 34                |
| High-middle SDI | 1                                   | 3              | 2                       | 4            | 5             | 7                 | 6                 | 9               | 10       | 14              | 13                   | 11                              | 12             | 18                         | 15             | 17                                   | 16            | 26                   | 20             | 19            | 22               | 21             | 23                     | 24                 | 25                      | 27                       | 28                      | 30             | 29                        | 32           | 31               | 33                       | 34                |
| Middle SDI      | 1                                   | 3              | 4                       | 2            | 6             | 5                 | 8                 | 10              | 9        | 11              | 13                   | 12                              | 17             | 14                         | 18             | 16                                   | 21            | 22                   | 15             | 19            | 26               | 23             | 27                     | 20                 | 29                      | 25                       | 24                      | 28             | 31                        | 32           | 30               | 33                       | 34                |
| Low-middle SDI  | 1                                   | 2              | 5                       | 6            | 3             | 10                | 13                | 11              | 12       | 8               | 14                   | 15                              | 19             | 7                          | 18             | 17                                   | 27            | 9                    | 20             | 16            | 24               | 21             | 22                     | 23                 | 31                      | 29                       | 25                      | 26             | 32                        | 33           | 28               | 30                       | 34                |
| Low SDI         | 7                                   | 6              | 8                       | 2            | 4             | 9                 | 12                | 5               | 11       | 1               | 10                   | 13                              | 15             | 16                         | 14             | 19                                   | 25            | 23                   | 18             | 20            | 21               | 17             | 28                     | 26                 | 29                      | 30                       | 27                      | 22             | 32                        | 33           | 24               | 31                       | 34                |
| South Asia      | 1                                   | 2              | 3                       | 4            | 5             | 7                 | 8                 | 9               | 10       | 11              | 12                   | 13                              | 14             | 15                         | 16             | 17                                   | 18            | 19                   | 20             | 21            | 22               | 23             | 24                     | 25                 | 26                      | 27                       | 28                      | 29             | 30                        | 31           | 32               | 33                       | 34                |

| Country                      | Tracheal, bronchus, and lung cancer | Stomach cancer | Colon and rectum cancer | Liver cancer | Breast cancer | Esophageal cancer | Pancreatic cancer | Prostate cancer | Leukemia | Cervical cancer | Non-Hodgkin lymphoma | Brain and nervous system cancer | Bladder cancer | Lip and oral cavity cancer | Ovarian cancer | Gallbladder and biliary tract cancer | Kidney cancer | Other pharynx cancer | Other leukemia | Larynx cancer | Multiple myeloma | Uterine cancer | Acute myeloid leukemia | Nasopharynx cancer | Malignant skin melanoma | Non-melanoma skin cancer | Acute lymphoid leukemia | Thyroid cancer | Chronic lymphoid leukemia | Mesothelioma | Hodgkin lymphoma | Chronic myeloid leukemia | Testicular cancer |
|------------------------------|-------------------------------------|----------------|-------------------------|--------------|---------------|-------------------|-------------------|-----------------|----------|-----------------|----------------------|---------------------------------|----------------|----------------------------|----------------|--------------------------------------|---------------|----------------------|----------------|---------------|------------------|----------------|------------------------|--------------------|-------------------------|--------------------------|-------------------------|----------------|---------------------------|--------------|------------------|--------------------------|-------------------|
| India                        | 3                                   | 1              | 7                       | 10           | 4             | 8                 | 14                | 17              | 11       | 9               | 15                   | 16                              | 19             | 5                          | 18             | 13                                   | 27            | 6                    | 26             | 12            | 21               | 25             | 20                     | 23                 | 33                      | 32                       | 24                      | 22             | 30                        | 31           | 28               | 29                       | 34                |
| Pakistan                     | 2                                   | 8              | 5                       | 11           | 1             | 6                 | 19                | 16              | 9        | 20              | 7                    | 15                              | 14             | 3                          | 13             | 17                                   | 27            | 12                   | 26             | 10            | 21               | 18             | 24                     | 28                 | 31                      | 34                       | 22                      | 23             | 32                        | 33           | 25               | 29                       | 30                |
| Bangladesh                   | 1                                   | 5              | 2                       | 9            | 6             | 10                | 11                | 16              | 13       | 8               | 17                   | 15                              | 18             | 3                          | 19             | 14                                   | 27            | 7                    | 25             | 12            | 23               | 26             | 21                     | 20                 | 34                      | 32                       | 24                      | 22             | 30                        | 33           | 28               | 29                       | 31                |
| Nepal                        | 2                                   | 1              | 5                       | 10           | 4             | 7                 | 13                | 17              | 11       | 6               | 15                   | 16                              | 19             | 8                          | 18             | 12                                   | 27            | 9                    | 26             | 14            | 25               | 21             | 23                     | 24                 | 33                      | 31                       | 22                      | 20             | 30                        | 32           | 28               | 29                       | 34                |
| Bhutan                       | 2                                   | 3              | 4                       | 7            | 6             | 8                 | 12                | 11              | 10       | 13              | 14                   | 15                              | 20             | 5                          | 18             | 16                                   | 25            | 9                    | 26             | 17            | 22               | 27             | 19                     | 23                 | 32                      | 33                       | 21                      | 24             | 31                        | 30           | 28               | 29                       | 34                |
| East Asia                    | 1                                   | 3              | 5                       | 2            | 8             | 4                 | 6                 | 14              | 9        | 11              | 12                   | 10                              | 16             | 18                         | 19             | 17                                   | 21            | 28                   | 13             | 20            | 25               | 23             | 26                     | 15                 | 29                      | 22                       | 24                      | 27             | 30                        | 32           | 31               | 33                       | 34                |
| China                        | 1                                   | 3              | 5                       | 2            | 8             | 4                 | 6                 | 14              | 9        | 11              | 12                   | 10                              | 16             | 18                         | 19             | 17                                   | 21            | 29                   | 13             | 20            | 25               | 23             | 26                     | 15                 | 28                      | 22                       | 24                      | 27             | 30                        | 32           | 31               | 33                       | 34                |
| North Korea                  | 1                                   | 2              | 5                       | 3            | 7             | 4                 | 10                | 17              | 6        | 9               | 13                   | 12                              | 14             | 21                         | 20             | 16                                   | 23            | 31                   | 11             | 18            | 26               | 19             | 25                     | 15                 | 30                      | 24                       | 22                      | 27             | 29                        | 32           | 28               | 33                       | 34                |
| Taiwan                       | 1                                   | 4              | 3                       | 2            | 7             | 5                 | 6                 | 10              | 13       | 14              | 11                   | 19                              | 12             | 8                          | 20             | 18                                   | 16            | 17                   | 21             | 24            | 22               | 23             | 25                     | 15                 | 29                      | 27                       | 26                      | 28             | 30                        | 31           | 32               | 33                       | 34                |
| Southeast Asia               | 1                                   | 5              | 3                       | 2            | 4             | 15                | 9                 | 10              | 8        | 7               | 11                   | 12                              | 20             | 13                         | 14             | 16                                   | 23            | 18                   | 17             | 22            | 27               | 21             | 28                     | 19                 | 30                      | 26                       | 24                      | 25             | 34                        | 31           | 29               | 32                       | 33                |
| Indonesia                    | 2                                   | 3              | 4                       | 6            | 1             | 23                | 9                 | 8               | 13       | 7               | 10                   | 11                              | 14             | 17                         | 12             | 15                                   | 19            | 20                   | 22             | 21            | 25               | 16             | 29                     | 18                 | 30                      | 26                       | 27                      | 24             | 34                        | 31           | 28               | 32                       | 33                |
| Philippines                  | 1                                   | 8              | 4                       | 3            | 2             | 21                | 10                | 7               | 6        | 9               | 12                   | 14                              | 24             | 15                         | 13             | 26                                   | 22            | 28                   | 11             | 23            | 27               | 17             | 19                     | 16                 | 29                      | 25                       | 18                      | 20             | 34                        | 31           | 32               | 30                       | 33                |
| Vietnam                      | 1                                   | 4              | 3                       | 2            | 6             | 8                 | 11                | 14              | 13       | 12              | 9                    | 16                              | 17             | 10                         | 15             | 21                                   | 24            | 7                    | 28             | 19            | 26               | 23             | 27                     | 18                 | 30                      | 25                       | 22                      | 20             | 34                        | 31           | 29               | 32                       | 33                |
| Thailand                     | 2                                   | 7              | 3                       | 1            | 4             | 13                | 9                 | 14              | 6        | 8               | 18                   | 15                              | 17             | 12                         | 16             | 5                                    | 23            | 24                   | 10             | 20            | 27               | 25             | 30                     | 19                 | 29                      | 22                       | 21                      | 26             | 34                        | 28           | 31               | 32                       | 33                |
| Myanmar                      | 1                                   | 4              | 2                       | 6            | 5             | 19                | 9                 | 12              | 8        | 3               | 11                   | 13                              | 17             | 14                         | 10             | 18                                   | 22            | 24                   | 15             | 20            | 26               | 16             | 27                     | 21                 | 30                      | 28                       | 23                      | 25             | 33                        | 32           | 29               | 31                       | 34                |
| Malaysia                     | 1                                   | 6              | 2                       | 4            | 3             | 14                | 9                 | 11              | 5        | 12              | 8                    | 16                              | 18             | 19                         | 13             | 23                                   | 21            | 26                   | 15             | 22            | 24               | 27             | 20                     | 10                 | 29                      | 28                       | 17                      | 25             | 33                        | 32           | 31               | 30                       | 34                |
| Sri Lanka                    | 1                                   | 7              | 5                       | 9            | 3             | 6                 | 10                | 11              | 2        | 18              | 12                   | 13                              | 23             | 8                          | 20             | 17                                   | 14            | 19                   | 15             | 27            | 25               | 26             | 22                     | 21                 | 31                      | 24                       | 16                      | 28             | 34                        | 30           | 29               | 32                       | 33                |
| Cambodia                     | 1                                   | 4              | 3                       | 6            | 2             | 16                | 9                 | 10              | 8        | 5               | 11                   | 14                              | 17             | 13                         | 15             | 20                                   | 24            | 22                   | 12             | 18            | 27               | 19             | 28                     | 21                 | 31                      | 26                       | 23                      | 25             | 34                        | 33           | 29               | 30                       | 32                |
| Laos                         | 1                                   | 3              | 4                       | 5            | 2             | 16                | 10                | 11              | 6        | 7               | 12                   | 13                              | 17             | 14                         | 15             | 18                                   | 24            | 23                   | 9              | 22            | 29               | 19             | 25                     | 20                 | 31                      | 28                       | 21                      | 26             | 34                        | 32           | 27               | 30                       | 33                |
| Mauritius                    | 1                                   | 4              | 2                       | 8            | 3             | 12                | 7                 | 6               | 9        | 10              | 17                   | 18                              | 15             | 11                         | 13             | 19                                   | 20            | 24                   | 14             | 21            | 22               | 16             | 26                     | 23                 | 30                      | 27                       | 25                      | 28             | 33                        | 32           | 29               | 31                       | 34                |
| Timor-Leste                  | 1                                   | 4              | 2                       | 6            | 3             | 16                | 10                | 9               | 8        | 7               | 11                   | 13                              | 17             | 15                         | 14             | 18                                   | 23            | 24                   | 12             | 22            | 28               | 21             | 26                     | 19                 | 30                      | 27                       | 20                      | 25             | 34                        | 32           | 29               | 31                       | 33                |
| Maldives                     | 1                                   | 9              | 4                       | 3            | 2             | 15                | 8                 | 10              | 5        | 13              | 11                   | 16                              | 12             | 7                          | 14             | 22                                   | 20            | 31                   | 17             | 21            | 23               | 28             | 24                     | 26                 | 29                      | 27                       | 18                      | 19             | 33                        | 25           | 32               | 30                       | 34                |
| Seychelles                   | 3                                   | 10             | 1                       | 9            | 4             | 11                | 8                 | 2               | 7        | 5               | 12                   | 14                              | 16             | 6                          | 18             | 24                                   | 21            | 13                   | 19             | 17            | 23               | 26             | 25                     | 20                 | 27                      | 28                       | 22                      | 31             | 33                        | 32           | 29               | 30                       | 34                |
| North Africa and Middle East | 1                                   | 3              | 4                       | 5            | 2             | 14                | 9                 | 10              | 6        | 18              | 12                   | 8                               | 11             | 25                         | 15             | 17                                   | 21            | 32                   | 13             | 16            | 20               | 22             | 19                     | 27                 | 30                      | 29                       | 23                      | 26             | 33                        | 31           | 24               | 28                       | 34                |
| Egypt                        | 2                                   | 9              | 5                       | 1            | 4             | 14                | 8                 | 12              | 7        | 23              | 13                   | 10                              | 3              | 26                         | 11             | 18                                   | 22            | 28                   | 15             | 20            | 19               | 24             | 16                     | 33                 | 31                      | 29                       | 21                      | 27             | 30                        | 32           | 17               | 25                       | 34                |

| Country              | Tracheal, bronchus, and lung cancer | Stomach cancer | Colon and rectum cancer | Liver cancer | Breast cancer | Esophageal cancer | Pancreatic cancer | Prostate cancer | Leukemia | Cervical cancer | Non-Hodgkin lymphoma | Brain and nervous system cancer | Bladder cancer | Lip and oral cavity cancer | Ovarian cancer | Gallbladder and biliary tract cancer | Kidney cancer | Other pharynx cancer | Other leukemia | Larynx cancer | Multiple myeloma | Uterine cancer | Acute myeloid leukemia | Nasopharynx cancer | Malignant skin melanoma | Non-melanoma skin cancer | Acute lymphoid leukemia | Thyroid cancer | Chronic lymphoid leukemia | Mesothelioma | Hodgkin lymphoma | Chronic myeloid leukemia | Testicular cancer |
|----------------------|-------------------------------------|----------------|-------------------------|--------------|---------------|-------------------|-------------------|-----------------|----------|-----------------|----------------------|---------------------------------|----------------|----------------------------|----------------|--------------------------------------|---------------|----------------------|----------------|---------------|------------------|----------------|------------------------|--------------------|-------------------------|--------------------------|-------------------------|----------------|---------------------------|--------------|------------------|--------------------------|-------------------|
| Iran                 | 2                                   | 1              | 4                       | 5            | 7             | 11                | 12                | 9               | 3        | 22              | 15                   | 6                               | 14             | 23                         | 17             | 18                                   | 19            | 32                   | 10             | 13            | 21               | 25             | 16                     | 33                 | 28                      | 30                       | 20                      | 29             | 26                        | 24           | 27               | 31                       | 34                |
| Turkey               | 1                                   | 3              | 2                       | 10           | 6             | 19                | 4                 | 7               | 5        | 23              | 11                   | 8                               | 12             | 27                         | 14             | 20                                   | 18            | 33                   | 17             | 16            | 15               | 21             | 13                     | 29                 | 24                      | 25                       | 22                      | 30             | 28                        | 26           | 32               | 31                       | 34                |
| Algeria              | 2                                   | 4              | 3                       | 11           | 1             | 20                | 7                 | 10              | 8        | 13              | 6                    | 12                              | 14             | 25                         | 17             | 9                                    | 22            | 28                   | 15             | 19            | 18               | 26             | 24                     | 16                 | 31                      | 29                       | 27                      | 21             | 32                        | 33           | 23               | 30                       | 34                |
| Iraq                 | 2                                   | 10             | 6                       | 11           | 1             | 21                | 12                | 13              | 3        | 24              | 8                    | 5                               | 9              | 23                         | 15             | 25                                   | 16            | 29                   | 7              | 14            | 26               | 20             | 18                     | 28                 | 32                      | 30                       | 22                      | 19             | 34                        | 33           | 17               | 27                       | 31                |
| Sudan                | 2                                   | 6              | 5                       | 3            | 1             | 14                | 12                | 11              | 4        | 15              | 10                   | 9                               | 13             | 25                         | 17             | 16                                   | 24            | 29                   | 7              | 21            | 23               | 20             | 18                     | 28                 | 31                      | 30                       | 19                      | 26             | 32                        | 34           | 22               | 27                       | 33                |
| Morocco              | 1                                   | 6              | 3                       | 15           | 2             | 18                | 8                 | 7               | 10       | 9               | 5                    | 11                              | 13             | 23                         | 14             | 20                                   | 25            | 26                   | 16             | 12            | 21               | 22             | 27                     | 17                 | 30                      | 28                       | 29                      | 19             | 34                        | 31           | 24               | 32                       | 33                |
| Afghanistan          | 3                                   | 1              | 5                       | 8            | 2             | 12                | 15                | 13              | 4        | 9               | 11                   | 10                              | 16             | 26                         | 20             | 17                                   | 28            | 29                   | 6              | 18            | 24               | 19             | 27                     | 25                 | 34                      | 30                       | 22                      | 23             | 33                        | 31           | 14               | 21                       | 32                |
| Saudi Arabia         | 3                                   | 10             | 2                       | 1            | 4             | 14                | 7                 | 12              | 5        | 22              | 8                    | 6                               | 13             | 19                         | 16             | 15                                   | 17            | 26                   | 11             | 23            | 18               | 27             | 20                     | 24                 | 31                      | 30                       | 25                      | 21             | 32                        | 33           | 29               | 28                       | 34                |
| Yemen                | 1                                   | 4              | 5                       | 6            | 2             | 15                | 11                | 12              | 3        | 13              | 10                   | 9                               | 14             | 25                         | 17             | 16                                   | 27            | 29                   | 7              | 20            | 23               | 18             | 22                     | 28                 | 32                      | 30                       | 21                      | 24             | 31                        | 33           | 19               | 26                       | 34                |
| Syria                | 3                                   | 8              | 5                       | 7            | 6             | 19                | 10                | 9               | 1        | 20              | 13                   | 4                               | 15             | 25                         | 17             | 24                                   | 22            | 28                   | 2              | 18            | 21               | 26             | 12                     | 31                 | 29                      | 27                       | 14                      | 30             | 23                        | 32           | 33               | 16                       | 34                |
| Tunisia              | 1                                   | 7              | 2                       | 14           | 3             | 26                | 10                | 6               | 9        | 18              | 5                    | 12                              | 4              | 20                         | 17             | 13                                   | 21            | 28                   | 19             | 11            | 15               | 22             | 23                     | 16                 | 30                      | 31                       | 27                      | 24             | 32                        | 33           | 25               | 29                       | 34                |
| United Arab Emirates | 1                                   | 9              | 2                       | 5            | 3             | 13                | 10                | 12              | 6        | 20              | 8                    | 4                               | 14             | 19                         | 22             | 21                                   | 16            | 25                   | 11             | 18            | 15               | 31             | 17                     | 23                 | 28                      | 32                       | 26                      | 27             | 34                        | 33           | 24               | 29                       | 30                |
| Jordan               | 1                                   | 8              | 3                       | 13           | 2             | 21                | 10                | 11              | 4        | 20              | 7                    | 9                               | 12             | 19                         | 14             | 15                                   | 16            | 27                   | 5              | 22            | 17               | 18             | 26                     | 24                 | 29                      | 25                       | 28                      | 23             | 34                        | 30           | 32               | 33                       | 31                |
| Libya                | 1                                   | 10             | 2                       | 8            | 3             | 22                | 5                 | 12              | 4        | 17              | 9                    | 11                              | 7              | 23                         | 16             | 14                                   | 18            | 29                   | 13             | 15            | 19               | 27             | 20                     | 21                 | 32                      | 30                       | 25                      | 26             | 31                        | 33           | 24               | 28                       | 34                |
| Lebanon              | 1                                   | 9              | 2                       | 13           | 3             | 22                | 10                | 5               | 8        | 24              | 6                    | 11                              | 4              | 23                         | 14             | 17                                   | 18            | 29                   | 12             | 16            | 15               | 21             | 19                     | 30                 | 27                      | 32                       | 26                      | 25             | 31                        | 34           | 20               | 28                       | 33                |
| Palestine            | 1                                   | 8              | 2                       | 7            | 3             | 19                | 11                | 10              | 4        | 24              | 12                   | 5                               | 13             | 25                         | 15             | 18                                   | 16            | 32                   | 6              | 23            | 17               | 14             | 20                     | 29                 | 30                      | 27                       | 22                      | 26             | 31                        | 34           | 21               | 28                       | 33                |
| Oman                 | 1                                   | 8              | 2                       | 4            | 6             | 13                | 10                | 11              | 5        | 20              | 7                    | 9                               | 16             | 18                         | 19             | 21                                   | 15            | 31                   | 12             | 23            | 14               | 26             | 17                     | 33                 | 28                      | 29                       | 22                      | 30             | 32                        | 27           | 24               | 25                       | 34                |
| Kuwait               | 2                                   | 10             | 3                       | 5            | 1             | 17                | 7                 | 12              | 4        | 21              | 8                    | 9                               | 13             | 22                         | 14             | 19                                   | 15            | 26                   | 11             | 24            | 20               | 16             | 18                     | 27                 | 30                      | 28                       | 23                      | 25             | 32                        | 29           | 31               | 33                       | 34                |
| Qatar                | 1                                   | 8              | 3                       | 4            | 2             | 14                | 7                 | 12              | 5        | 22              | 10                   | 9                               | 17             | 20                         | 15             | 23                                   | 16            | 28                   | 11             | 21            | 18               | 24             | 13                     | 29                 | 26                      | 30                       | 19                      | 27             | 33                        | 32           | 31               | 25                       | 34                |
| Bahrain              | 1                                   | 7              | 3                       | 8            | 2             | 17                | 6                 | 10              | 4        | 20              | 9                    | 13                              | 12             | 19                         | 14             | 24                                   | 15            | 29                   | 11             | 21            | 16               | 23             | 18                     | 27                 | 32                      | 31                       | 25                      | 26             | 33                        | 28           | 22               | 30                       | 34                |
| Western Europe       | 1                                   | 6              | 2                       | 9            | 3             | 12                | 5                 | 4               | 8        | 22              | 11                   | 15                              | 10             | 20                         | 14             | 17                                   | 13            | 26                   | 21             | 27            | 16               | 23             | 18                     | 30                 | 19                      | 28                       | 32                      | 31             | 25                        | 24           | 33               | 29                       | 34                |
| Germany              | 1                                   | 6              | 2                       | 9            | 3             | 15                | 4                 | 5               | 8        | 23              | 12                   | 14                              | 10             | 20                         | 13             | 16                                   | 11            | 21                   | 22             | 27            | 17               | 25             | 18                     | 31                 | 19                      | 28                       | 32                      | 30             | 24                        | 26           | 33               | 29                       | 34                |
| United Kingdom       | 1                                   | 7              | 2                       | 13           | 4             | 6                 | 5                 | 3               | 8        | 23              | 11                   | 15                              | 10             | 21                         | 12             | 20                                   | 14            | 27                   | 25             | 28            | 16               | 22             | 17                     | 30                 | 19                      | 26                       | 32                      | 31             | 24                        | 18           | 33               | 29                       | 34                |
| France               | 1                                   | 9              | 2                       | 6            | 3             | 12                | 5                 | 4               | 7        | 23              | 11                   | 16                              | 10             | 18                         | 14             | 20                                   | 13            | 21                   | 17             | 27            | 15               | 24             | 19                     | 30                 | 22                      | 28                       | 32                      | 31             | 26                        | 25           | 33               | 29                       | 34                |
| Italy                | 1                                   | 4              | 2                       | 6            | 3             | 18                | 5                 | 7               | 9        | 25              | 11                   | 14                              | 8              | 19                         | 15             | 13                                   | 12            | 28                   | 21             | 24            | 16               | 26             | 17                     | 31                 | 20                      | 27                       | 32                      | 30             | 22                        | 23           | 33               | 29                       | 34                |

| Country                  | Tracheal, bronchus, and lung cancer | Stomach cancer | Colon and rectum cancer | Liver cancer | Breast cancer | Esophageal cancer | Pancreatic cancer | Prostate cancer | Leukemia | Cervical cancer | Non-Hodgkin lymphoma | Brain and nervous system cancer | Bladder cancer | Lip and oral cavity cancer | Ovarian cancer | Gallbladder and biliary tract cancer | Kidney cancer | Other pharynx cancer | Other leukemia | Larynx cancer | Multiple myeloma | Uterine cancer | Acute myeloid leukemia | Nasopharynx cancer | Malignant skin melanoma | Non-melanoma skin cancer | Acute lymphoid leukemia | Thyroid cancer | Chronic lymphoid leukemia | Mesothelioma | Hodgkin lymphoma | Chronic myeloid leukemia | Testicular cancer |
|--------------------------|-------------------------------------|----------------|-------------------------|--------------|---------------|-------------------|-------------------|-----------------|----------|-----------------|----------------------|---------------------------------|----------------|----------------------------|----------------|--------------------------------------|---------------|----------------------|----------------|---------------|------------------|----------------|------------------------|--------------------|-------------------------|--------------------------|-------------------------|----------------|---------------------------|--------------|------------------|--------------------------|-------------------|
| England                  | 1                                   | 7              | 2                       | 13           | 4             | 6                 | 5                 | 3               | 9        | 23              | 11                   | 15                              | 10             | 22                         | 12             | 20                                   | 14            | 27                   | 25             | 28            | 16               | 21             | 17                     | 30                 | 19                      | 26                       | 32                      | 31             | 24                        | 18           | 33               | 29                       | 34                |
| Spain                    | 1                                   | 4              | 2                       | 9            | 5             | 15                | 6                 | 3               | 10       | 24              | 11                   | 12                              | 7              | 20                         | 14             | 17                                   | 13            | 26                   | 18             | 19            | 16               | 22             | 21                     | 29                 | 23                      | 25                       | 32                      | 30             | 27                        | 28           | 33               | 31                       | 34                |
| Netherlands              | 1                                   | 6              | 2                       | 14           | 3             | 8                 | 5                 | 4               | 9        | 24              | 11                   | 15                              | 10             | 23                         | 13             | 19                                   | 12            | 25                   | 18             | 26            | 16               | 22             | 21                     | 28                 | 17                      | 27                       | 32                      | 29             | 30                        | 20           | 33               | 31                       | 34                |
| Belgium                  | 1                                   | 7              | 2                       | 12           | 3             | 11                | 5                 | 4               | 8        | 22              | 10                   | 15                              | 9              | 19                         | 14             | 21                                   | 13            | 25                   | 17             | 26            | 16               | 23             | 18                     | 29                 | 20                      | 28                       | 32                      | 31             | 27                        | 24           | 33               | 30                       | 34                |
| Greece                   | 1                                   | 6              | 2                       | 7            | 3             | 21                | 5                 | 4               | 8        | 20              | 17                   | 10                              | 9              | 26                         | 13             | 15                                   | 14            | 33                   | 12             | 19            | 16               | 22             | 18                     | 28                 | 23                      | 24                       | 32                      | 30             | 25                        | 31           | 27               | 29                       | 34                |
| Portugal                 | 2                                   | 3              | 1                       | 8            | 5             | 13                | 6                 | 4               | 9        | 21              | 11                   | 12                              | 10             | 18                         | 15             | 17                                   | 16            | 23                   | 24             | 19            | 14               | 22             | 20                     | 28                 | 25                      | 27                       | 31                      | 29             | 26                        | 32           | 33               | 30                       | 34                |
| Sweden                   | 1                                   | 7              | 2                       | 13           | 5             | 18                | 4                 | 3               | 8        | 20              | 10                   | 14                              | 9              | 23                         | 11             | 16                                   | 12            | 26                   | 24             | 30            | 17               | 21             | 19                     | 32                 | 15                      | 27                       | 31                      | 29             | 22                        | 25           | 33               | 28                       | 34                |
| South East England       | 1                                   | 9              | 2                       | 15           | 4             | 6                 | 5                 | 3               | 8        | 24              | 11                   | 14                              | 10             | 22                         | 12             | 20                                   | 13            | 27                   | 25             | 29            | 17               | 21             | 16                     | 30                 | 19                      | 26                       | 33                      | 31             | 23                        | 18           | 32               | 28                       | 34                |
| Greater London           | 1                                   | 6              | 2                       | 12           | 3             | 7                 | 5                 | 4               | 8        | 23              | 11                   | 13                              | 10             | 21                         | 14             | 20                                   | 15            | 27                   | 25             | 28            | 17               | 22             | 16                     | 30                 | 18                      | 26                       | 32                      | 31             | 24                        | 19           | 33               | 29                       | 34                |
| Austria                  | 1                                   | 6              | 2                       | 7            | 4             | 17                | 3                 | 5               | 9        | 22              | 10                   | 14                              | 11             | 20                         | 12             | 15                                   | 13            | 24                   | 25             | 27            | 16               | 23             | 19                     | 31                 | 18                      | 26                       | 32                      | 30             | 21                        | 28           | 33               | 29                       | 34                |
| Switzerland              | 1                                   | 9              | 2                       | 7            | 4             | 12                | 5                 | 3               | 11       | 26              | 8                    | 14                              | 10             | 18                         | 13             | 19                                   | 15            | 24                   | 28             | 27            | 16               | 22             | 20                     | 31                 | 17                      | 25                       | 32                      | 29             | 23                        | 21           | 33               | 30                       | 34                |
| Israel                   | 1                                   | 6              | 2                       | 12           | 3             | 19                | 4                 | 8               | 5        | 20              | 7                    | 10                              | 11             | 25                         | 13             | 22                                   | 14            | 33                   | 24             | 26            | 16               | 21             | 15                     | 32                 | 17                      | 23                       | 29                      | 27             | 18                        | 28           | 31               | 30                       | 34                |
| North West England       | 1                                   | 7              | 2                       | 12           | 3             | 6                 | 5                 | 4               | 9        | 22              | 11                   | 15                              | 10             | 21                         | 13             | 20                                   | 14            | 25                   | 26             | 28            | 18               | 23             | 16                     | 30                 | 19                      | 27                       | 32                      | 31             | 24                        | 17           | 33               | 29                       | 34                |
| East of England          | 1                                   | 7              | 2                       | 14           | 4             | 6                 | 5                 | 3               | 9        | 23              | 11                   | 15                              | 10             | 24                         | 12             | 20                                   | 13            | 27                   | 25             | 29            | 16               | 21             | 18                     | 30                 | 19                      | 26                       | 33                      | 31             | 22                        | 17           | 32               | 28                       | 34                |
| West Midlands            | 1                                   | 7              | 2                       | 13           | 4             | 6                 | 5                 | 3               | 9        | 23              | 11                   | 15                              | 10             | 22                         | 12             | 20                                   | 14            | 27                   | 25             | 28            | 16               | 21             | 17                     | 30                 | 18                      | 26                       | 33                      | 31             | 24                        | 19           | 32               | 29                       | 34                |
| Denmark                  | 1                                   | 9              | 2                       | 15           | 4             | 12                | 5                 | 3               | 6        | 21              | 13                   | 10                              | 7              | 20                         | 11             | 19                                   | 14            | 22                   | 26             | 27            | 17               | 24             | 18                     | 30                 | 16                      | 28                       | 31                      | 33             | 23                        | 25           | 32               | 29                       | 34                |
| Finland                  | 1                                   | 6              | 2                       | 9            | 5             | 16                | 3                 | 4               | 10       | 24              | 8                    | 13                              | 14             | 21                         | 12             | 17                                   | 11            | 26                   | 25             | 29            | 15               | 19             | 20                     | 33                 | 18                      | 27                       | 31                      | 28             | 22                        | 23           | 32               | 30                       | 34                |
| South West England       | 1                                   | 7              | 2                       | 14           | 4             | 6                 | 5                 | 3               | 9        | 24              | 11                   | 15                              | 10             | 23                         | 12             | 21                                   | 13            | 27                   | 26             | 29            | 16               | 20             | 17                     | 30                 | 18                      | 25                       | 32                      | 31             | 22                        | 19           | 33               | 28                       | 34                |
| Yorkshire and the Humber | 1                                   | 6              | 2                       | 12           | 4             | 7                 | 5                 | 3               | 9        | 21              | 11                   | 15                              | 10             | 23                         | 14             | 20                                   | 13            | 27                   | 25             | 28            | 16               | 22             | 17                     | 30                 | 19                      | 26                       | 32                      | 31             | 24                        | 18           | 33               | 29                       | 34                |
| Scotland                 | 1                                   | 7              | 2                       | 12           | 3             | 5                 | 6                 | 4               | 8        | 25              | 11                   | 15                              | 9              | 18                         | 14             | 21                                   | 13            | 26                   | 23             | 27            | 17               | 22             | 16                     | 29                 | 19                      | 28                       | 32                      | 31             | 24                        | 20           | 30               | 33                       | 34                |
| Norway                   | 1                                   | 7              | 2                       | 17           | 5             | 16                | 4                 | 3               | 8        | 20              | 12                   | 11                              | 9              | 22                         | 10             | 19                                   | 14            | 27                   | 25             | 29            | 15               | 21             | 18                     | 32                 | 13                      | 26                       | 31                      | 30             | 23                        | 24           | 33               | 28                       | 34                |
| East Midlands            | 1                                   | 7              | 2                       | 13           | 4             | 6                 | 5                 | 3               | 9        | 22              | 11                   | 15                              | 10             | 24                         | 12             | 20                                   | 14            | 27                   | 25             | 28            | 17               | 21             | 16                     | 30                 | 18                      | 26                       | 33                      | 31             | 23                        | 19           | 32               | 29                       | 34                |
| Ireland                  | 1                                   | 6              | 2                       | 14           | 3             | 7                 | 5                 | 4               | 8        | 21              | 10                   | 12                              | 15             | 22                         | 11             | 19                                   | 13            | 27                   | 20             | 26            | 16               | 24             | 18                     | 30                 | 17                      | 25                       | 31                      | 32             | 23                        | 28           | 33               | 29                       | 34                |
| Wales                    | 1                                   | 6              | 2                       | 14           | 4             | 7                 | 5                 | 3               | 8        | 23              | 11                   | 15                              | 10             | 22                         | 12             | 20                                   | 13            | 27                   | 26             | 28            | 17               | 21             | 16                     | 30                 | 18                      | 25                       | 31                      | 33             | 24                        | 19           | 32               | 29                       | 34                |
| North East England       | 1                                   | 6              | 2                       | 11           | 4             | 7                 | 5                 | 3               | 9        | 22              | 12                   | 16                              | 10             | 21                         | 14             | 20                                   | 13            | 28                   | 25             | 26            | 17               | 24             | 18                     | 30                 | 19                      | 27                       | 32                      | 31             | 23                        | 15           | 33               | 29                       | 34                |

| Country          | Tracheal, bronchus, and lung cancer | Stomach cancer | Colon and rectum cancer | Liver cancer | Breast cancer | Esophageal cancer | Pancreatic cancer | Prostate cancer | Leukemia | Cervical cancer | Non-Hodgkin lymphoma | Brain and nervous system cancer | Bladder cancer | Lip and oral cavity cancer | Ovarian cancer | Gallbladder and biliary tract cancer | Kidney cancer | Other pharynx cancer | Other leukemia | Larynx cancer | Multiple myeloma | Uterine cancer | Acute myeloid leukemia | Nasopharynx cancer | Malignant skin melanoma | Non-melanoma skin cancer | Acute lymphoid leukemia | Thyroid cancer | Chronic lymphoid leukemia | Mesothelioma | Hodgkin lymphoma | Chronic myeloid leukemia | Testicular cancer |
|------------------|-------------------------------------|----------------|-------------------------|--------------|---------------|-------------------|-------------------|-----------------|----------|-----------------|----------------------|---------------------------------|----------------|----------------------------|----------------|--------------------------------------|---------------|----------------------|----------------|---------------|------------------|----------------|------------------------|--------------------|-------------------------|--------------------------|-------------------------|----------------|---------------------------|--------------|------------------|--------------------------|-------------------|
| Northern Ireland | 1                                   | 6              | 2                       | 14           | 3             | 7                 | 5                 | 4               | 12       | 22              | 8                    | 15                              | 13             | 20                         | 9              | 21                                   | 10            | 27                   | 28             | 26            | 16               | 23             | 19                     | 29                 | 17                      | 25                       | 33                      | 32             | 24                        | 18           | 31               | 30                       | 34                |
| Cyprus           | 1                                   | 6              | 2                       | 11           | 3             | 21                | 5                 | 4               | 7        | 23              | 9                    | 12                              | 10             | 25                         | 13             | 15                                   | 16            | 33                   | 18             | 27            | 14               | 19             | 17                     | 32                 | 20                      | 24                       | 28                      | 29             | 22                        | 26           | 30               | 31                       | 34                |
| Luxembourg       | 1                                   | 7              | 2                       | 9            | 3             | 14                | 4                 | 5               | 6        | 23              | 13                   | 12                              | 11             | 20                         | 10             | 21                                   | 19            | 24                   | 15             | 25            | 16               | 22             | 18                     | 30                 | 17                      | 28                       | 32                      | 29             | 27                        | 26           | 33               | 31                       | 34                |
| Malta            | 1                                   | 5              | 2                       | 14           | 3             | 16                | 4                 | 6               | 8        | 24              | 10                   | 12                              | 9              | 19                         | 11             | 22                                   | 13            | 29                   | 28             | 23            | 17               | 18             | 15                     | 25                 | 20                      | 26                       | 32                      | 30             | 27                        | 21           | 33               | 31                       | 34                |
| Iceland          | 1                                   | 7              | 2                       | 14           | 5             | 11                | 4                 | 3               | 10       | 23              | 13                   | 8                               | 12             | 21                         | 16             | 20                                   | 6             | 29                   | 19             | 27            | 15               | 24             | 18                     | 32                 | 17                      | 30                       | 31                      | 22             | 26                        | 25           | 33               | 28                       | 34                |
| Andorra          | 1                                   | 6              | 2                       | 14           | 4             | 12                | 5                 | 3               | 8        | 23              | 9                    | 13                              | 10             | 21                         | 11             | 20                                   | 15            | 27                   | 24             | 28            | 16               | 25             | 17                     | 29                 | 19                      | 26                       | 32                      | 31             | 22                        | 18           | 33               | 30                       | 34                |
| Western SSA      | 8                                   | 5              | 7                       | 1            | 3             | 12                | 9                 | 2               | 11       | 4               | 10                   | 13                              | 14             | 21                         | 15             | 16                                   | 22            | 25                   | 20             | 23            | 19               | 17             | 18                     | 32                 | 27                      | 31                       | 26                      | 29             | 30                        | 34           | 24               | 28                       | 33                |
| Nigeria          | 7                                   | 9              | 6                       | 1            | 3             | 13                | 12                | 2               | 8        | 4               | 10                   | 11                              | 22             | 24                         | 14             | 15                                   | 23            | 27                   | 19             | 21            | 20               | 16             | 18                     | 30                 | 26                      | 31                       | 25                      | 32             | 28                        | 33           | 17               | 29                       | 34                |
| Ghana            | 9                                   | 6              | 8                       | 1            | 3             | 13                | 5                 | 4               | 12       | 2               | 7                    | 11                              | 15             | 18                         | 16             | 17                                   | 21            | 24                   | 22             | 23            | 19               | 14             | 20                     | 32                 | 28                      | 27                       | 25                      | 33             | 30                        | 31           | 29               | 26                       | 34                |
| Cameroon         | 3                                   | 2              | 7                       | 1            | 6             | 10                | 9                 | 5               | 11       | 4               | 12                   | 13                              | 14             | 20                         | 17             | 15                                   | 19            | 24                   | 23             | 21            | 22               | 16             | 18                     | 32                 | 27                      | 29                       | 25                      | 30             | 31                        | 33           | 28               | 26                       | 34                |
| Cote d'Ivoire    | 5                                   | 6              | 9                       | 2            | 3             | 21                | 11                | 1               | 10       | 4               | 7                    | 12                              | 13             | 16                         | 14             | 17                                   | 25            | 23                   | 22             | 18            | 15               | 19             | 20                     | 32                 | 24                      | 31                       | 28                      | 26             | 30                        | 34           | 27               | 29                       | 33                |
| Niger            | 5                                   | 2              | 8                       | 1            | 7             | 10                | 11                | 4               | 9        | 3               | 12                   | 13                              | 14             | 20                         | 19             | 15                                   | 22            | 25                   | 17             | 21            | 23               | 16             | 18                     | 32                 | 31                      | 30                       | 24                      | 28             | 29                        | 34           | 26               | 27                       | 33                |
| Burkina Faso     | 8                                   | 3              | 5                       | 1            | 4             | 9                 | 10                | 7               | 12       | 2               | 11                   | 13                              | 15             | 18                         | 17             | 16                                   | 21            | 24                   | 20             | 23            | 19               | 14             | 22                     | 31                 | 29                      | 30                       | 26                      | 28             | 32                        | 34           | 25               | 27                       | 33                |
| Mali             | 8                                   | 2              | 7                       | 1            | 4             | 15                | 10                | 9               | 11       | 3               | 12                   | 13                              | 5              | 22                         | 16             | 14                                   | 17            | 29                   | 18             | 24            | 20               | 21             | 19                     | 33                 | 26                      | 31                       | 25                      | 27             | 30                        | 34           | 23               | 28                       | 32                |
| Senegal          | 4                                   | 3              | 8                       | 1            | 5             | 11                | 9                 | 6               | 10       | 2               | 12                   | 13                              | 14             | 20                         | 15             | 17                                   | 22            | 25                   | 19             | 23            | 21               | 16             | 18                     | 32                 | 28                      | 31                       | 24                      | 29             | 30                        | 34           | 27               | 26                       | 33                |
| Chad             | 4                                   | 3              | 8                       | 1            | 7             | 12                | 10                | 5               | 9        | 2               | 11                   | 13                              | 14             | 20                         | 19             | 15                                   | 21            | 25                   | 16             | 23            | 22               | 17             | 18                     | 32                 | 29                      | 31                       | 24                      | 28             | 30                        | 34           | 26               | 27                       | 33                |
| Guinea           | 4                                   | 3              | 8                       | 1            | 5             | 17                | 9                 | 7               | 10       | 2               | 13                   | 12                              | 11             | 14                         | 16             | 15                                   | 20            | 24                   | 26             | 23            | 22               | 18             | 21                     | 33                 | 19                      | 32                       | 25                      | 29             | 31                        | 34           | 27               | 28                       | 30                |
| Benin            | 4                                   | 2              | 7                       | 1            | 5             | 10                | 9                 | 6               | 11       | 3               | 12                   | 13                              | 14             | 19                         | 17             | 15                                   | 21            | 24                   | 20             | 23            | 22               | 16             | 18                     | 32                 | 28                      | 31                       | 25                      | 29             | 30                        | 34           | 27               | 26                       | 33                |
| Togo             | 5                                   | 2              | 7                       | 1            | 4             | 11                | 9                 | 6               | 10       | 3               | 12                   | 13                              | 14             | 19                         | 15             | 17                                   | 23            | 25                   | 20             | 22            | 21               | 16             | 18                     | 33                 | 29                      | 30                       | 24                      | 28             | 31                        | 34           | 27               | 26                       | 32                |
| Sierra Leone     | 5                                   | 2              | 7                       | 1            | 4             | 11                | 9                 | 6               | 10       | 3               | 12                   | 13                              | 14             | 20                         | 15             | 16                                   | 23            | 24                   | 19             | 21            | 22               | 17             | 18                     | 32                 | 29                      | 31                       | 25                      | 28             | 30                        | 34           | 27               | 26                       | 33                |
| Liberia          | 8                                   | 2              | 6                       | 1            | 4             | 10                | 9                 | 5               | 11       | 3               | 12                   | 13                              | 14             | 20                         | 15             | 17                                   | 21            | 24                   | 18             | 23            | 22               | 16             | 19                     | 32                 | 30                      | 31                       | 25                      | 29             | 28                        | 33           | 27               | 26                       | 34                |
| Mauritania       | 6                                   | 4              | 8                       | 1            | 2             | 12                | 9                 | 5               | 11       | 3               | 10                   | 13                              | 15             | 21                         | 14             | 17                                   | 19            | 25                   | 22             | 23            | 20               | 16             | 18                     | 32                 | 26                      | 31                       | 24                      | 27             | 29                        | 33           | 30               | 28                       | 34                |
| The Gambia       | 5                                   | 6              | 8                       | 1            | 4             | 13                | 7                 | 11              | 10       | 2               | 9                    | 12                              | 18             | 20                         | 14             | 16                                   | 22            | 23                   | 21             | 26            | 15               | 17             | 19                     | 32                 | 29                      | 30                       | 24                      | 25             | 31                        | 34           | 27               | 28                       | 33                |
| Guinea-Bissau    | 5                                   | 2              | 6                       | 1            | 4             | 9                 | 10                | 7               | 11       | 3               | 12                   | 13                              | 14             | 20                         | 17             | 16                                   | 23            | 24                   | 18             | 19            | 22               | 15             | 21                     | 32                 | 30                      | 29                       | 25                      | 28             | 31                        | 34           | 27               | 26                       | 33                |
| Cape Verde       | 3                                   | 1              | 6                       | 5            | 10            | 4                 | 7                 | 2               | 11       | 8               | 13                   | 14                              | 15             | 12                         | 24             | 23                                   | 16            | 22                   | 18             | 20            | 21               | 17             | 19                     | 28                 | 27                      | 30                       | 25                      | 31             | 29                        | 34           | 32               | 26                       | 33                |



| Country                   | Tracheal, bronchus, and lung cancer | Stomach cancer | Colon and rectum cancer | Liver cancer | Breast cancer | Esophageal cancer | Pancreatic cancer | Prostate cancer | Leukemia | Cervical cancer | Non-Hodgkin lymphoma | Brain and nervous system cancer | Bladder cancer | Lip and oral cavity cancer | Ovarian cancer | Gallbladder and biliary tract cancer | Kidney cancer | Other pharynx cancer | Other leukemia | Larynx cancer | Multiple myeloma | Uterine cancer | Acute myeloid leukemia | Nasopharynx cancer | Malignant skin melanoma | Non-melanoma skin cancer | Acute lymphoid leukemia | Thyroid cancer | Chronic lymphoid leukemia | Mesothelioma | Hodgkin lymphoma | Chronic myeloid leukemia | Testicular cancer |
|---------------------------|-------------------------------------|----------------|-------------------------|--------------|---------------|-------------------|-------------------|-----------------|----------|-----------------|----------------------|---------------------------------|----------------|----------------------------|----------------|--------------------------------------|---------------|----------------------|----------------|---------------|------------------|----------------|------------------------|--------------------|-------------------------|--------------------------|-------------------------|----------------|---------------------------|--------------|------------------|--------------------------|-------------------|
| Sao Tome and Principe     | 2                                   | 3              | 5                       | 13           | 6             | 10                | 8                 | 7               | 12       | 4               | 9                    | 14                              | 11             | 24                         | 17             | 16                                   | 19            | 25                   | 23             | 21            | 20               | 15             | 18                     | 32                 | 30                      | 27                       | 22                      | 28             | 29                        | 33           | 31               | 26                       | 34                |
| Eastern SSA               | 10                                  | 9              | 5                       | 4            | 7             | 8                 | 11                | 3               | 13       | 1               | 6                    | 14                              | 15             | 16                         | 12             | 26                                   | 27            | 24                   | 25             | 20            | 18               | 17             | 30                     | 23                 | 21                      | 29                       | 28                      | 19             | 33                        | 32           | 22               | 31                       | 34                |
| Ethiopia                  | 9                                   | 8              | 4                       | 5            | 6             | 10                | 12                | 2               | 13       | 1               | 7                    | 14                              | 17             | 15                         | 11             | 25                                   | 28            | 24                   | 26             | 22            | 18               | 16             | 30                     | 20                 | 21                      | 27                       | 29                      | 19             | 33                        | 32           | 23               | 31                       | 34                |
| Tanzania                  | 9                                   | 7              | 5                       | 6            | 8             | 10                | 11                | 1               | 13       | 3               | 4                    | 14                              | 15             | 18                         | 12             | 27                                   | 24            | 23                   | 26             | 21            | 17               | 16             | 30                     | 22                 | 19                      | 28                       | 29                      | 20             | 33                        | 32           | 25               | 31                       | 34                |
| Kenya                     | 9                                   | 2              | 4                       | 5            | 6             | 7                 | 10                | 8               | 11       | 3               | 12                   | 13                              | 19             | 16                         | 14             | 21                                   | 28            | 24                   | 23             | 15            | 17               | 27             | 22                     | 18                 | 29                      | 25                       | 20                      | 31             | 33                        | 34           | 26               | 30                       | 32                |
| Uganda                    | 9                                   | 10             | 7                       | 6            | 4             | 3                 | 13                | 1               | 11       | 2               | 5                    | 14                              | 17             | 16                         | 12             | 29                                   | 27            | 25                   | 20             | 24            | 19               | 15             | 30                     | 22                 | 23                      | 28                       | 26                      | 21             | 33                        | 34           | 18               | 31                       | 32                |
| Mozambique                | 7                                   | 3              | 5                       | 1            | 6             | 8                 | 12                | 10              | 14       | 2               | 13                   | 9                               | 15             | 17                         | 11             | 25                                   | 24            | 28                   | 23             | 22            | 18               | 16             | 29                     | 33                 | 21                      | 26                       | 27                      | 19             | 31                        | 32           | 20               | 30                       | 34                |
| Madagascar                | 10                                  | 9              | 4                       | 7            | 5             | 8                 | 12                | 3               | 11       | 1               | 6                    | 14                              | 16             | 17                         | 13             | 26                                   | 29            | 25                   | 23             | 24            | 18               | 15             | 30                     | 21                 | 22                      | 27                       | 28                      | 19             | 34                        | 33           | 20               | 31                       | 32                |
| Malawi                    | 10                                  | 11             | 9                       | 7            | 8             | 2                 | 12                | 6               | 13       | 3               | 4                    | 15                              | 5              | 17                         | 16             | 24                                   | 18            | 29                   | 20             | 26            | 21               | 22             | 27                     | 32                 | 14                      | 23                       | 25                      | 19             | 33                        | 34           | 28               | 30                       | 31                |
| Zambia                    | 10                                  | 7              | 5                       | 6            | 8             | 9                 | 11                | 3               | 14       | 1               | 4                    | 13                              | 16             | 15                         | 12             | 27                                   | 25            | 23                   | 28             | 19            | 17               | 18             | 30                     | 24                 | 21                      | 26                       | 29                      | 20             | 34                        | 33           | 22               | 31                       | 32                |
| South Sudan               | 10                                  | 9              | 5                       | 6            | 8             | 4                 | 12                | 2               | 11       | 1               | 7                    | 15                              | 16             | 17                         | 13             | 26                                   | 27            | 25                   | 21             | 24            | 20               | 14             | 30                     | 18                 | 23                      | 28                       | 29                      | 19             | 32                        | 34           | 22               | 31                       | 33                |
| Rwanda                    | 10                                  | 9              | 7                       | 6            | 4             | 8                 | 12                | 3               | 13       | 1               | 5                    | 14                              | 15             | 17                         | 11             | 28                                   | 26            | 22                   | 25             | 23            | 18               | 16             | 30                     | 21                 | 19                      | 29                       | 27                      | 20             | 33                        | 32           | 24               | 31                       | 34                |
| Burundi                   | 10                                  | 9              | 8                       | 7            | 4             | 6                 | 13                | 3               | 11       | 1               | 5                    | 14                              | 16             | 17                         | 12             | 26                                   | 29            | 22                   | 25             | 21            | 19               | 15             | 30                     | 23                 | 24                      | 28                       | 27                      | 20             | 34                        | 33           | 18               | 31                       | 32                |
| Somalia                   | 10                                  | 6              | 5                       | 9            | 4             | 7                 | 13                | 3               | 11       | 1               | 8                    | 15                              | 16             | 19                         | 12             | 25                                   | 29            | 26                   | 21             | 23            | 20               | 14             | 30                     | 22                 | 24                      | 28                       | 27                      | 17             | 33                        | 34           | 18               | 31                       | 32                |
| Eritrea                   | 10                                  | 8              | 6                       | 7            | 4             | 9                 | 13                | 3               | 12       | 1               | 5                    | 14                              | 16             | 18                         | 11             | 26                                   | 28            | 25                   | 24             | 23            | 17               | 15             | 30                     | 22                 | 21                      | 29                       | 27                      | 19             | 34                        | 33           | 20               | 31                       | 32                |
| Djibouti                  | 10                                  | 9              | 4                       | 6            | 7             | 8                 | 11                | 1               | 13       | 2               | 5                    | 14                              | 15             | 16                         | 12             | 27                                   | 23            | 24                   | 26             | 22            | 17               | 18             | 30                     | 21                 | 20                      | 28                       | 29                      | 19             | 32                        | 33           | 25               | 31                       | 34                |
| Comoros                   | 10                                  | 9              | 5                       | 7            | 4             | 8                 | 12                | 3               | 13       | 2               | 6                    | 14                              | 15             | 18                         | 11             | 28                                   | 25            | 26                   | 24             | 23            | 17               | 16             | 30                     | 21                 | 20                      | 29                       | 27                      | 19             | 33                        | 32           | 22               | 31                       | 34                |
| High-income North America | 1                                   | 10             | 2                       | 9            | 3             | 12                | 4                 | 5               | 6        | 21              | 8                    | 13                              | 11             | 22                         | 14             | 24                                   | 15            | 28                   | 19             | 25            | 16               | 20             | 17                     | 33                 | 18                      | 26                       | 30                      | 29             | 23                        | 27           | 32               | 31                       | 34                |
| United States             | 1                                   | 12             | 2                       | 9            | 3             | 11                | 4                 | 5               | 6        | 21              | 8                    | 13                              | 10             | 22                         | 14             | 25                                   | 15            | 27                   | 19             | 24            | 16               | 20             | 17                     | 33                 | 18                      | 26                       | 30                      | 29             | 23                        | 28           | 32               | 31                       | 34                |
| Canada                    | 1                                   | 6              | 2                       | 12           | 3             | 11                | 5                 | 4               | 8        | 21              | 7                    | 14                              | 10             | 20                         | 15             | 17                                   | 13            | 28                   | 22             | 27            | 16               | 23             | 19                     | 31                 | 18                      | 26                       | 30                      | 29             | 24                        | 25           | 33               | 32                       | 34                |
| Central Latin America     | 1                                   | 2              | 4                       | 6            | 5             | 17                | 10                | 3               | 8        | 9               | 11                   | 12                              | 18             | 25                         | 13             | 14                                   | 16            | 30                   | 21             | 23            | 19               | 24             | 20                     | 33                 | 26                      | 22                       | 15                      | 27             | 31                        | 34           | 28               | 29                       | 32                |
| Mexico                    | 1                                   | 2              | 4                       | 6            | 5             | 18                | 10                | 3               | 8        | 9               | 11                   | 12                              | 17             | 24                         | 14             | 16                                   | 13            | 33                   | 22             | 23            | 19               | 25             | 20                     | 34                 | 27                      | 21                       | 15                      | 26             | 32                        | 31           | 28               | 30                       | 29                |
| Colombia                  | 2                                   | 1              | 3                       | 8            | 5             | 15                | 10                | 4               | 7        | 9               | 11                   | 12                              | 18             | 24                         | 14             | 13                                   | 19            | 31                   | 20             | 22            | 17               | 25             | 23                     | 32                 | 26                      | 21                       | 16                      | 27             | 29                        | 33           | 30               | 28                       | 34                |
| Venezuela                 | 1                                   | 3              | 5                       | 10           | 4             | 16                | 9                 | 2               | 8        | 7               | 11                   | 12                              | 18             | 24                         | 13             | 17                                   | 14            | 27                   | 25             | 15            | 20               | 23             | 21                     | 31                 | 28                      | 22                       | 19                      | 29             | 32                        | 34           | 26               | 30                       | 33                |
| Guatemala                 | 6                                   | 1              | 7                       | 2            | 9             | 19                | 10                | 3               | 5        | 4               | 14                   | 12                              | 22             | 21                         | 19             | 15                                   | 20            | 26                   | 11             | 25            | 24               | 16             | 23                     | 28                 | 30                      | 18                       | 13                      | 27             | 31                        | 34           | 29               | 32                       | 33                |

| Country                  | Tracheal, bronchus, and lung cancer | Stomach cancer | Colon and rectum cancer | Liver cancer | Breast cancer | Esophageal cancer | Pancreatic cancer | Prostate cancer | Leukemia | Cervical cancer | Non-Hodgkin lymphoma | Brain and nervous system cancer | Bladder cancer | Lip and oral cavity cancer | Ovarian cancer | Gallbladder and biliary tract cancer | Kidney cancer | Other pharynx cancer | Other leukemia | Larynx cancer | Multiple myeloma | Uterine cancer | Acute myeloid leukemia | Nasopharynx cancer | Malignant skin melanoma | Non-melanoma skin cancer | Acute lymphoid leukemia | Thyroid cancer | Chronic lymphoid leukemia | Mesothelioma | Hodgkin lymphoma | Chronic myeloid leukemia | Testicular cancer |
|--------------------------|-------------------------------------|----------------|-------------------------|--------------|---------------|-------------------|-------------------|-----------------|----------|-----------------|----------------------|---------------------------------|----------------|----------------------------|----------------|--------------------------------------|---------------|----------------------|----------------|---------------|------------------|----------------|------------------------|--------------------|-------------------------|--------------------------|-------------------------|----------------|---------------------------|--------------|------------------|--------------------------|-------------------|
| Honduras                 | 3                                   | 1              | 6                       | 5            | 8             | 26                | 9                 | 4               | 2        | 7               | 15                   | 14                              | 25             | 20                         | 16             | 12                                   | 27            | 19                   | 21             | 22            | 24               | 11             | 17                     | 30                 | 31                      | 28                       | 10                      | 32             | 23                        | 33           | 29               | 18                       | 34                |
| El Salvador              | 3                                   | 1              | 4                       | 7            | 8             | 18                | 9                 | 5               | 6        | 2               | 14                   | 11                              | 19             | 22                         | 16             | 13                                   | 20            | 27                   | 12             | 23            | 21               | 15             | 26                     | 29                 | 32                      | 24                       | 17                      | 31             | 25                        | 33           | 28               | 30                       | 34                |
| Nicaragua                | 6                                   | 1              | 5                       | 3            | 7             | 20                | 10                | 4               | 8        | 2               | 14                   | 11                              | 21             | 23                         | 15             | 12                                   | 17            | 28                   | 16             | 19            | 25               | 24             | 22                     | 32                 | 29                      | 18                       | 13                      | 26             | 30                        | 34           | 31               | 27                       | 33                |
| Costa Rica               | 4                                   | 1              | 2                       | 6            | 5             | 20                | 9                 | 3               | 8        | 11              | 10                   | 12                              | 14             | 24                         | 15             | 18                                   | 17            | 30                   | 26             | 23            | 13               | 21             | 19                     | 31                 | 25                      | 22                       | 16                      | 32             | 29                        | 34           | 28               | 27                       | 33                |
| Panama                   | 2                                   | 4              | 3                       | 8            | 5             | 19                | 10                | 1               | 6        | 9               | 12                   | 11                              | 21             | 23                         | 14             | 18                                   | 15            | 25                   | 22             | 24            | 16               | 17             | 20                     | 30                 | 27                      | 26                       | 13                      | 28             | 29                        | 34           | 32               | 31                       | 33                |
| Tropical Latin America   | 1                                   | 3              | 2                       | 8            | 5             | 9                 | 7                 | 4               | 12       | 10              | 13                   | 11                              | 17             | 14                         | 18             | 15                                   | 19            | 20                   | 23             | 16            | 21               | 25             | 22                     | 33                 | 26                      | 24                       | 27                      | 28             | 30                        | 29           | 31               | 32                       | 34                |
| Brazil                   | 1                                   | 2              | 3                       | 8            | 5             | 9                 | 7                 | 4               | 12       | 11              | 13                   | 10                              | 17             | 14                         | 18             | 15                                   | 19            | 20                   | 24             | 16            | 21               | 25             | 22                     | 33                 | 26                      | 23                       | 27                      | 28             | 30                        | 29           | 31               | 32                       | 34                |
| Paraguay                 | 1                                   | 6              | 2                       | 11           | 4             | 10                | 9                 | 3               | 8        | 5               | 12                   | 13                              | 23             | 17                         | 15             | 14                                   | 18            | 25                   | 16             | 20            | 26               | 19             | 21                     | 34                 | 28                      | 24                       | 22                      | 27             | 30                        | 33           | 29               | 31                       | 32                |
| Eastern Europe           | 1                                   | 3              | 2                       | 8            | 4             | 14                | 5                 | 6               | 10       | 15              | 19                   | 13                              | 12             | 16                         | 9              | 22                                   | 11            | 21                   | 25             | 18            | 23               | 17             | 24                     | 31                 | 20                      | 26                       | 28                      | 29             | 27                        | 32           | 30               | 33                       | 34                |
| Russia                   | 1                                   | 3              | 2                       | 8            | 4             | 12                | 5                 | 7               | 11       | 15              | 19                   | 14                              | 13             | 17                         | 10             | 22                                   | 9             | 21                   | 27             | 18            | 23               | 16             | 24                     | 33                 | 20                      | 25                       | 28                      | 29             | 26                        | 32           | 30               | 31                       | 34                |
| Ukraine                  | 1                                   | 3              | 2                       | 13           | 4             | 15                | 5                 | 6               | 8        | 10              | 21                   | 12                              | 11             | 14                         | 9              | 18                                   | 16            | 19                   | 23             | 17            | 25               | 22             | 24                     | 28                 | 20                      | 27                       | 29                      | 31             | 26                        | 30           | 32               | 33                       | 34                |
| Belarus                  | 1                                   | 3              | 2                       | 13           | 4             | 12                | 5                 | 6               | 7        | 10              | 17                   | 11                              | 14             | 16                         | 9              | 19                                   | 15            | 20                   | 30             | 18            | 23               | 25             | 22                     | 29                 | 21                      | 26                       | 27                      | 31             | 24                        | 33           | 32               | 28                       | 34                |
| Moldova                  | 1                                   | 3              | 2                       | 5            | 4             | 20                | 6                 | 8               | 12       | 9               | 17                   | 10                              | 14             | 15                         | 16             | 23                                   | 18            | 13                   | 22             | 11            | 25               | 19             | 26                     | 27                 | 21                      | 24                       | 28                      | 30             | 31                        | 33           | 29               | 34                       | 32                |
| Lithuania                | 1                                   | 3              | 2                       | 14           | 5             | 13                | 6                 | 4               | 10       | 15              | 16                   | 12                              | 11             | 17                         | 7              | 22                                   | 9             | 24                   | 27             | 18            | 21               | 19             | 23                     | 33                 | 20                      | 26                       | 29                      | 28             | 25                        | 32           | 31               | 30                       | 34                |
| Latvia                   | 1                                   | 3              | 2                       | 12           | 6             | 14                | 4                 | 5               | 11       | 18              | 15                   | 13                              | 8              | 17                         | 9              | 26                                   | 10            | 23                   | 27             | 19            | 21               | 16             | 25                     | 33                 | 20                      | 24                       | 30                      | 28             | 22                        | 32           | 31               | 29                       | 34                |
| Estonia                  | 1                                   | 3              | 2                       | 12           | 6             | 16                | 4                 | 5               | 8        | 15              | 14                   | 13                              | 11             | 18                         | 10             | 22                                   | 7             | 24                   | 27             | 25            | 19               | 21             | 20                     | 33                 | 17                      | 26                       | 29                      | 28             | 23                        | 32           | 31               | 30                       | 34                |
| High-income Asia Pacific | 1                                   | 2              | 3                       | 4            | 10            | 9                 | 5                 | 8               | 12       | 19              | 11                   | 20                              | 13             | 18                         | 15             | 6                                    | 14            | 23                   | 21             | 25            | 16               | 22             | 17                     | 29                 | 30                      | 27                       | 28                      | 24             | 32                        | 26           | 33               | 31                       | 34                |
| Japan                    | 1                                   | 2              | 3                       | 4            | 10            | 9                 | 5                 | 8               | 12       | 19              | 11                   | 22                              | 13             | 18                         | 15             | 6                                    | 14            | 23                   | 20             | 27            | 16               | 21             | 17                     | 29                 | 30                      | 26                       | 28                      | 24             | 32                        | 25           | 33               | 31                       | 34                |
| South Korea              | 1                                   | 3              | 4                       | 2            | 8             | 9                 | 5                 | 10              | 11       | 15              | 12                   | 16                              | 13             | 21                         | 17             | 6                                    | 14            | 24                   | 20             | 23            | 18               | 26             | 19                     | 28                 | 29                      | 25                       | 27                      | 22             | 32                        | 31           | 33               | 30                       | 34                |
| Singapore                | 1                                   | 5              | 2                       | 3            | 4             | 13                | 6                 | 8               | 9        | 16              | 10                   | 19                              | 18             | 22                         | 12             | 15                                   | 14            | 24                   | 23             | 25            | 21               | 20             | 17                     | 11                 | 30                      | 29                       | 26                      | 27             | 32                        | 28           | 33               | 31                       | 34                |
| Brunei                   | 1                                   | 5              | 2                       | 4            | 3             | 21                | 9                 | 11              | 8        | 10              | 7                    | 12                              | 20             | 14                         | 13             | 16                                   | 17            | 22                   | 24             | 26            | 19               | 25             | 15                     | 18                 | 27                      | 30                       | 23                      | 28             | 34                        | 32           | 31               | 29                       | 33                |
| Central SSA              | 4                                   | 7              | 8                       | 2            | 3             | 9                 | 11                | 6               | 10       | 1               | 12                   | 13                              | 14             | 18                         | 15             | 19                                   | 22            | 27                   | 17             | 21            | 20               | 16             | 24                     | 30                 | 29                      | 25                       | 23                      | 26             | 34                        | 33           | 28               | 31                       | 32                |
| DRC                      | 7                                   | 4              | 8                       | 2            | 3             | 9                 | 11                | 5               | 10       | 1               | 12                   | 13                              | 14             | 18                         | 15             | 19                                   | 25            | 28                   | 17             | 21            | 20               | 16             | 23                     | 30                 | 29                      | 24                       | 22                      | 26             | 34                        | 33           | 27               | 31                       | 32                |
| Angola                   | 4                                   | 8              | 6                       | 2            | 3             | 9                 | 11                | 7               | 10       | 1               | 12                   | 13                              | 15             | 16                         | 14             | 20                                   | 22            | 26                   | 18             | 21            | 19               | 17             | 23                     | 30                 | 27                      | 25                       | 24                      | 28             | 34                        | 32           | 29               | 31                       | 33                |
| CAR                      | 4                                   | 2              | 5                       | 6            | 3             | 8                 | 11                | 7               | 10       | 1               | 12                   | 15                              | 13             | 16                         | 18             | 20                                   | 24            | 28                   | 17             | 19            | 21               | 14             | 26                     | 30                 | 29                      | 22                       | 25                      | 27             | 34                        | 33           | 23               | 31                       | 32                |



| Country                | Tracheal, bronchus, and lung cancer | Stomach cancer | Colon and rectum cancer | Liver cancer | Breast cancer | Esophageal cancer | Pancreatic cancer | Prostate cancer | Leukemia | Cervical cancer | Non-Hodgkin lymphoma | Brain and nervous system cancer | Bladder cancer | Lip and oral cavity cancer | Ovarian cancer | Gallbladder and biliary tract cancer | Kidney cancer | Other pharynx cancer | Other leukemia | Larynx cancer | Multiple myeloma | Uterine cancer | Acute myeloid leukemia | Nasopharynx cancer | Malignant skin melanoma | Non-melanoma skin cancer | Acute lymphoid leukemia | Thyroid cancer | Chronic lymphoid leukemia | Mesothelioma | Hodgkin lymphoma | Chronic myeloid leukemia | Testicular cancer |
|------------------------|-------------------------------------|----------------|-------------------------|--------------|---------------|-------------------|-------------------|-----------------|----------|-----------------|----------------------|---------------------------------|----------------|----------------------------|----------------|--------------------------------------|---------------|----------------------|----------------|---------------|------------------|----------------|------------------------|--------------------|-------------------------|--------------------------|-------------------------|----------------|---------------------------|--------------|------------------|--------------------------|-------------------|
| Congo                  | 4                                   | 9              | 5                       | 2            | 3             | 8                 | 10                | 6               | 12       | 1               | 11                   | 14                              | 15             | 17                         | 13             | 19                                   | 21            | 26                   | 20             | 22            | 18               | 16             | 23                     | 30                 | 27                      | 25                       | 24                      | 28             | 33                        | 32           | 29               | 31                       | 34                |
| Gabon                  | 6                                   | 10             | 4                       | 1            | 2             | 7                 | 9                 | 3               | 12       | 5               | 11                   | 15                              | 13             | 16                         | 14             | 20                                   | 19            | 26                   | 23             | 21            | 17               | 18             | 22                     | 29                 | 24                      | 25                       | 28                      | 27             | 33                        | 32           | 30               | 31                       | 34                |
| Equatorial Guinea      | 2                                   | 10             | 4                       | 1            | 3             | 8                 | 9                 | 5               | 12       | 6               | 11                   | 14                              | 15             | 16                         | 13             | 21                                   | 18            | 23                   | 25             | 19            | 17               | 20             | 22                     | 29                 | 24                      | 26                       | 27                      | 28             | 33                        | 32           | 30               | 31                       | 34                |
| Central Europe         | 1                                   | 5              | 2                       | 8            | 3             | 17                | 4                 | 6               | 10       | 14              | 16                   | 11                              | 9              | 18                         | 13             | 15                                   | 12            | 20                   | 27             | 19            | 23               | 22             | 24                     | 31                 | 21                      | 26                       | 29                      | 28             | 25                        | 33           | 30               | 32                       | 34                |
| Poland                 | 1                                   | 3              | 2                       | 14           | 4             | 17                | 5                 | 6               | 9        | 15              | 16                   | 11                              | 8              | 19                         | 12             | 13                                   | 10            | 25                   | 26             | 18            | 21               | 22             | 23                     | 33                 | 20                      | 27                       | 29                      | 28             | 24                        | 30           | 31               | 32                       | 34                |
| Romania                | 1                                   | 3              | 2                       | 6            | 4             | 19                | 5                 | 7               | 12       | 9               | 18                   | 10                              | 11             | 14                         | 13             | 20                                   | 16            | 17                   | 24             | 15            | 26               | 22             | 23                     | 28                 | 25                      | 21                       | 29                      | 30             | 27                        | 33           | 31               | 32                       | 34                |
| Czech Republic         | 1                                   | 7              | 2                       | 10           | 4             | 16                | 3                 | 5               | 9        | 17              | 15                   | 14                              | 12             | 18                         | 13             | 11                                   | 6             | 23                   | 24             | 26            | 19               | 21             | 22                     | 33                 | 20                      | 27                       | 30                      | 28             | 25                        | 31           | 29               | 32                       | 34                |
| Hungary                | 1                                   | 5              | 2                       | 10           | 3             | 16                | 4                 | 6               | 8        | 19              | 17                   | 14                              | 9              | 12                         | 13             | 15                                   | 11            | 18                   | 26             | 20            | 24               | 23             | 22                     | 28                 | 21                      | 27                       | 30                      | 29             | 25                        | 34           | 32               | 31                       | 33                |
| Serbia                 | 1                                   | 6              | 2                       | 8            | 3             | 18                | 4                 | 5               | 11       | 12              | 16                   | 9                               | 10             | 19                         | 13             | 15                                   | 14            | 24                   | 27             | 17            | 25               | 22             | 20                     | 31                 | 21                      | 23                       | 29                      | 30             | 26                        | 34           | 28               | 32                       | 33                |
| Bulgaria               | 1                                   | 3              | 2                       | 7            | 4             | 19                | 5                 | 6               | 11       | 13              | 17                   | 8                               | 10             | 18                         | 12             | 20                                   | 15            | 24                   | 25             | 14            | 26               | 16             | 22                     | 32                 | 21                      | 23                       | 30                      | 29             | 27                        | 34           | 28               | 31                       | 33                |
| Slovakia               | 1                                   | 5              | 2                       | 8            | 3             | 17                | 4                 | 6               | 11       | 19              | 18                   | 10                              | 14             | 15                         | 13             | 12                                   | 9             | 16                   | 27             | 22            | 23               | 20             | 24                     | 31                 | 21                      | 26                       | 28                      | 29             | 25                        | 34           | 30               | 33                       | 32                |
| Croatia                | 1                                   | 4              | 2                       | 7            | 3             | 16                | 6                 | 5               | 10       | 19              | 14                   | 9                               | 11             | 17                         | 13             | 15                                   | 12            | 22                   | 27             | 20            | 21               | 23             | 24                     | 33                 | 18                      | 26                       | 31                      | 29             | 25                        | 28           | 32               | 30                       | 34                |
| Bosnia and Herzegovina | 1                                   | 3              | 2                       | 6            | 4             | 17                | 5                 | 7               | 10       | 15              | 18                   | 8                               | 11             | 19                         | 13             | 12                                   | 14            | 24                   | 27             | 16            | 25               | 20             | 22                     | 32                 | 21                      | 26                       | 28                      | 29             | 23                        | 34           | 30               | 31                       | 33                |
| Albania                | 1                                   | 2              | 6                       | 3            | 9             | 15                | 8                 | 4               | 10       | 14              | 17                   | 7                               | 22             | 18                         | 16             | 21                                   | 13            | 23                   | 11             | 12            | 25               | 20             | 26                     | 29                 | 24                      | 19                       | 30                      | 27             | 34                        | 31           | 28               | 33                       | 32                |
| Macedonia              | 1                                   | 3              | 2                       | 6            | 4             | 20                | 5                 | 7               | 11       | 14              | 18                   | 9                               | 10             | 21                         | 13             | 17                                   | 19            | 27                   | 24             | 12            | 26               | 16             | 22                     | 33                 | 15                      | 23                       | 29                      | 31             | 25                        | 34           | 28               | 30                       | 32                |
| Slovenia               | 1                                   | 6              | 2                       | 7            | 4             | 17                | 5                 | 3               | 8        | 20              | 11                   | 15                              | 10             | 23                         | 13             | 14                                   | 12            | 18                   | 27             | 24            | 19               | 21             | 25                     | 33                 | 16                      | 26                       | 29                      | 31             | 22                        | 28           | 32               | 30                       | 34                |
| Montenegro             | 1                                   | 6              | 2                       | 7            | 3             | 15                | 5                 | 4               | 9        | 13              | 19                   | 8                               | 11             | 18                         | 12             | 17                                   | 16            | 26                   | 31             | 10            | 25               | 23             | 20                     | 34                 | 22                      | 24                       | 28                      | 29             | 21                        | 33           | 27               | 30                       | 32                |
| Central Asia           | 1                                   | 2              | 5                       | 3            | 4             | 6                 | 8                 | 12              | 10       | 11              | 15                   | 9                               | 16             | 17                         | 13             | 22                                   | 14            | 24                   | 19             | 18            | 27               | 20             | 21                     | 29                 | 26                      | 25                       | 23                      | 30             | 31                        | 34           | 28               | 32                       | 33                |
| Uzbekistan             | 2                                   | 1              | 5                       | 4            | 3             | 8                 | 11                | 14              | 9        | 10              | 12                   | 6                               | 21             | 13                         | 17             | 27                                   | 16            | 23                   | 19             | 15            | 28               | 20             | 18                     | 26                 | 29                      | 25                       | 22                      | 33             | 30                        | 34           | 24               | 31                       | 32                |
| Kazakhstan             | 1                                   | 2              | 3                       | 6            | 4             | 5                 | 7                 | 13              | 10       | 9               | 18                   | 12                              | 16             | 15                         | 11             | 20                                   | 14            | 22                   | 25             | 19            | 26               | 17             | 21                     | 28                 | 23                      | 27                       | 24                      | 29             | 31                        | 33           | 30               | 32                       | 34                |
| Azerbaijan             | 1                                   | 2              | 4                       | 3            | 6             | 5                 | 7                 | 11              | 8        | 12              | 18                   | 10                              | 17             | 20                         | 16             | 19                                   | 15            | 27                   | 13             | 14            | 25               | 22             | 21                     | 30                 | 26                      | 24                       | 23                      | 29             | 31                        | 34           | 28               | 33                       | 32                |
| Tajikistan             | 4                                   | 1              | 6                       | 5            | 8             | 2                 | 10                | 11              | 7        | 13              | 15                   | 9                               | 16             | 17                         | 12             | 21                                   | 19            | 24                   | 14             | 23            | 28               | 22             | 20                     | 29                 | 25                      | 26                       | 18                      | 30             | 31                        | 34           | 27               | 33                       | 32                |
| Kyrgyzstan             | 2                                   | 1              | 6                       | 3            | 4             | 9                 | 8                 | 13              | 10       | 7               | 17                   | 11                              | 18             | 15                         | 12             | 21                                   | 14            | 25                   | 19             | 23            | 27               | 16             | 20                     | 29                 | 26                      | 22                       | 24                      | 28             | 32                        | 34           | 30               | 33                       | 31                |
| Turkmenistan           | 3                                   | 1              | 8                       | 6            | 4             | 2                 | 11                | 16              | 10       | 9               | 18                   | 7                               | 21             | 13                         | 14             | 17                                   | 12            | 19                   | 15             | 22            | 23               | 26             | 20                     | 25                 | 28                      | 27                       | 24                      | 31             | 32                        | 34           | 29               | 33                       | 30                |
| Georgia                | 1                                   | 2              | 4                       | 5            | 3             | 18                | 7                 | 8               | 9        | 11              | 17                   | 12                              | 10             | 18                         | 15             | 21                                   | 19            | 25                   | 20             | 13            | 28               | 14             | 24                     | 32                 | 22                      | 23                       | 27                      | 30             | 29                        | 33           | 26               | 34                       | 31                |

| Country                | Tracheal, bronchus, and lung cancer | Stomach cancer | Colon and rectum cancer | Liver cancer | Breast cancer | Esophageal cancer | Pancreatic cancer | Prostate cancer | Leukemia | Cervical cancer | Non-Hodgkin lymphoma | Brain and nervous system cancer | Bladder cancer | Lip and oral cavity cancer | Ovarian cancer | Gallbladder and biliary tract cancer | Kidney cancer | Other pharynx cancer | Other leukemia | Larynx cancer | Multiple myeloma | Uterine cancer | Acute myeloid leukemia | Nasopharynx cancer | Malignant skin melanoma | Non-melanoma skin cancer | Acute lymphoid leukemia | Thyroid cancer | Chronic lymphoid leukemia | Mesothelioma | Hodgkin lymphoma | Chronic myeloid leukemia | Testicular cancer |
|------------------------|-------------------------------------|----------------|-------------------------|--------------|---------------|-------------------|-------------------|-----------------|----------|-----------------|----------------------|---------------------------------|----------------|----------------------------|----------------|--------------------------------------|---------------|----------------------|----------------|---------------|------------------|----------------|------------------------|--------------------|-------------------------|--------------------------|-------------------------|----------------|---------------------------|--------------|------------------|--------------------------|-------------------|
| Armenia                | 1                                   | 3              | 4                       | 5            | 2             | 19                | 6                 | 8               | 11       | 12              | 17                   | 9                               | 10             | 21                         | 13             | 20                                   | 16            | 28                   | 15             | 14            | 25               | 18             | 22                     | 31                 | 29                      | 23                       | 24                      | 27             | 30                        | 26           | 33               | 32                       | 34                |
| Mongolia               | 3                                   | 2              | 7                       | 1            | 8             | 4                 | 9                 | 17              | 11       | 6               | 12                   | 10                              | 23             | 15                         | 13             | 14                                   | 16            | 27                   | 25             | 20            | 26               | 18             | 19                     | 30                 | 32                      | 21                       | 22                      | 24             | 29                        | 33           | 31               | 28                       | 34                |
| Southern SSA           | 1                                   | 9              | 6                       | 8            | 5             | 3                 | 10                | 4               | 11       | 2               | 12                   | 18                              | 13             | 15                         | 14             | 25                                   | 24            | 28                   | 17             | 19            | 20               | 21             | 23                     | 30                 | 22                      | 16                       | 27                      | 29             | 33                        | 26           | 31               | 32                       | 34                |
| South Africa           | 1                                   | 11             | 6                       | 8            | 4             | 3                 | 9                 | 5               | 10       | 2               | 15                   | 18                              | 17             | 12                         | 14             | 24                                   | 21            | 27                   | 13             | 19            | 20               | 23             | 22                     | 29                 | 25                      | 16                       | 28                      | 31             | 33                        | 26           | 30               | 32                       | 34                |
| Zimbabwe               | 8                                   | 5              | 7                       | 3            | 6             | 4                 | 11                | 2               | 13       | 1               | 9                    | 15                              | 12             | 24                         | 14             | 25                                   | 27            | 29                   | 22             | 19            | 18               | 16             | 23                     | 31                 | 20                      | 17                       | 26                      | 21             | 33                        | 32           | 28               | 30                       | 34                |
| Namibia                | 6                                   | 10             | 4                       | 12           | 2             | 16                | 9                 | 3               | 11       | 5               | 8                    | 15                              | 19             | 7                          | 17             | 26                                   | 24            | 20                   | 25             | 18            | 22               | 23             | 21                     | 29                 | 14                      | 13                       | 28                      | 30             | 34                        | 27           | 31               | 32                       | 33                |
| Botswana               | 1                                   | 9              | 8                       | 7            | 6             | 3                 | 10                | 4               | 11       | 2               | 13                   | 15                              | 19             | 12                         | 16             | 25                                   | 23            | 26                   | 17             | 18            | 20               | 24             | 21                     | 28                 | 22                      | 14                       | 29                      | 31             | 34                        | 27           | 30               | 32                       | 33                |
| Lesotho                | 1                                   | 6              | 7                       | 9            | 4             | 3                 | 11                | 5               | 10       | 2               | 18                   | 17                              | 16             | 14                         | 19             | 22                                   | 23            | 30                   | 12             | 15            | 21               | 20             | 24                     | 28                 | 25                      | 13                       | 29                      | 32             | 34                        | 26           | 27               | 31                       | 33                |
| Swaziland              | 1                                   | 9              | 7                       | 8            | 6             | 3                 | 11                | 4               | 10       | 2               | 16                   | 15                              | 18             | 12                         | 19             | 24                                   | 23            | 27                   | 14             | 17            | 20               | 21             | 22                     | 28                 | 25                      | 13                       | 26                      | 31             | 34                        | 29           | 30               | 32                       | 33                |
| Southern Latin America | 1                                   | 3              | 2                       | 11           | 4             | 10                | 6                 | 5               | 12       | 9               | 14                   | 16                              | 15             | 22                         | 17             | 8                                    | 13            | 29                   | 18             | 21            | 19               | 20             | 23                     | 34                 | 24                      | 25                       | 26                      | 27             | 28                        | 31           | 32               | 33                       | 30                |
| Argentina              | 1                                   | 4              | 2                       | 12           | 3             | 10                | 6                 | 5               | 11       | 8               | 14                   | 16                              | 15             | 22                         | 17             | 9                                    | 13            | 30                   | 18             | 19            | 21               | 20             | 23                     | 34                 | 24                      | 25                       | 26                      | 27             | 28                        | 29           | 32               | 33                       | 31                |
| Chile                  | 2                                   | 1              | 3                       | 9            | 6             | 11                | 7                 | 4               | 12       | 10              | 14                   | 18                              | 15             | 24                         | 17             | 5                                    | 13            | 29                   | 19             | 25            | 16               | 22             | 20                     | 34                 | 23                      | 21                       | 26                      | 27             | 30                        | 32           | 33               | 31                       | 28                |
| Uruguay                | 1                                   | 4              | 2                       | 17           | 5             | 9                 | 6                 | 3               | 11       | 10              | 14                   | 16                              | 13             | 22                         | 15             | 7                                    | 12            | 27                   | 19             | 20            | 18               | 21             | 23                     | 32                 | 24                      | 26                       | 31                      | 28             | 25                        | 33           | 30               | 29                       | 34                |
| Andean Latin America   | 2                                   | 1              | 4                       | 5            | 7             | 19                | 10                | 3               | 8        | 6               | 11                   | 13                              | 21             | 24                         | 15             | 12                                   | 17            | 28                   | 14             | 27            | 18               | 16             | 22                     | 34                 | 26                      | 25                       | 20                      | 23             | 33                        | 32           | 29               | 31                       | 30                |
| Peru                   | 2                                   | 1              | 4                       | 5            | 7             | 20                | 9                 | 3               | 8        | 6               | 11                   | 13                              | 19             | 23                         | 15             | 12                                   | 16            | 28                   | 14             | 27            | 18               | 17             | 21                     | 34                 | 26                      | 24                       | 22                      | 25             | 33                        | 30           | 29               | 32                       | 31                |
| Ecuador                | 3                                   | 1              | 5                       | 4            | 9             | 21                | 10                | 2               | 8        | 7               | 11                   | 12                              | 22             | 25                         | 17             | 13                                   | 18            | 28                   | 14             | 27            | 19               | 15             | 20                     | 33                 | 26                      | 24                       | 16                      | 23             | 34                        | 32           | 29               | 30                       | 31                |
| Bolivia                | 2                                   | 1              | 4                       | 6            | 7             | 17                | 10                | 3               | 8        | 5               | 12                   | 13                              | 19             | 25                         | 16             | 11                                   | 20            | 27                   | 14             | 26            | 18               | 15             | 23                     | 34                 | 28                      | 24                       | 22                      | 21             | 33                        | 32           | 29               | 31                       | 30                |
| Caribbean              | 1                                   | 5              | 3                       | 8            | 4             | 12                | 10                | 2               | 9        | 7               | 11                   | 14                              | 15             | 18                         | 20             | 23                                   | 21            | 25                   | 17             | 13            | 19               | 16             | 24                     | 28                 | 29                      | 22                       | 26                      | 30             | 32                        | 33           | 27               | 31                       | 34                |
| Cuba                   | 1                                   | 6              | 3                       | 8            | 4             | 10                | 7                 | 2               | 12       | 13              | 15                   | 14                              | 11             | 17                         | 20             | 22                                   | 21            | 23                   | 25             | 9             | 18               | 16             | 24                     | 30                 | 29                      | 19                       | 31                      | 32             | 28                        | 33           | 27               | 26                       | 34                |
| Haiti                  | 5                                   | 4              | 6                       | 10           | 2             | 14                | 12                | 1               | 7        | 3               | 11                   | 15                              | 18             | 21                         | 17             | 16                                   | 24            | 27                   | 9              | 19            | 20               | 13             | 25                     | 30                 | 31                      | 26                       | 22                      | 29             | 32                        | 33           | 23               | 28                       | 34                |
| Dominican Republic     | 2                                   | 7              | 3                       | 4            | 5             | 15                | 10                | 1               | 9        | 8               | 14                   | 12                              | 22             | 13                         | 21             | 23                                   | 26            | 18                   | 11             | 16            | 17               | 20             | 24                     | 25                 | 29                      | 19                       | 27                      | 28             | 31                        | 33           | 30               | 32                       | 34                |
| Jamaica                | 2                                   | 5              | 3                       | 11           | 4             | 15                | 10                | 1               | 8        | 6               | 9                    | 18                              | 17             | 22                         | 14             | 20                                   | 21            | 25                   | 12             | 19            | 16               | 13             | 23                     | 29                 | 28                      | 27                       | 24                      | 26             | 31                        | 33           | 32               | 30                       | 34                |
| Trinidad and Tobago    | 4                                   | 8              | 2                       | 11           | 3             | 18                | 7                 | 1               | 9        | 6               | 12                   | 16                              | 19             | 20                         | 10             | 23                                   | 17            | 24                   | 15             | 22            | 14               | 13             | 21                     | 28                 | 29                      | 27                       | 25                      | 26             | 32                        | 33           | 31               | 30                       | 34                |
| Guyana                 | 6                                   | 7              | 4                       | 8            | 2             | 15                | 10                | 1               | 9        | 3               | 12                   | 16                              | 21             | 20                         | 11             | 19                                   | 17            | 27                   | 13             | 22            | 18               | 14             | 30                     | 32                 | 24                      | 25                       | 23                      | 29             | 33                        | 31           | 28               | 26                       | 34                |
| Suriname               | 2                                   | 8              | 1                       | 6            | 4             | 21                | 9                 | 3               | 10       | 5               | 12                   | 11                              | 17             | 19                         | 13             | 16                                   | 18            | 29                   | 14             | 22            | 15               | 20             | 23                     | 24                 | 26                      | 27                       | 30                      | 25             | 32                        | 33           | 28               | 31                       | 34                |

| Country                          | Tracheal, bronchus, and lung cancer | Stomach cancer | Colon and rectum cancer | Liver cancer | Breast cancer | Esophageal cancer | Pancreatic cancer | Prostate cancer | Leukemia | Cervical cancer | Non-Hodgkin lymphoma | Brain and nervous system cancer | Bladder cancer | Lip and oral cavity cancer | Ovarian cancer | Gallbladder and biliary tract cancer | Kidney cancer | Other pharynx cancer | Other leukemia | Larynx cancer | Multiple myeloma | Uterine cancer | Acute myeloid leukemia | Nasopharynx cancer | Malignant skin melanoma | Non-melanoma skin cancer | Acute lymphoid leukemia | Thyroid cancer | Chronic lymphoid leukemia | Mesothelioma | Hodgkin lymphoma | Chronic myeloid leukemia | Testicular cancer |
|----------------------------------|-------------------------------------|----------------|-------------------------|--------------|---------------|-------------------|-------------------|-----------------|----------|-----------------|----------------------|---------------------------------|----------------|----------------------------|----------------|--------------------------------------|---------------|----------------------|----------------|---------------|------------------|----------------|------------------------|--------------------|-------------------------|--------------------------|-------------------------|----------------|---------------------------|--------------|------------------|--------------------------|-------------------|
| The Bahamas                      | 4                                   | 5              | 3                       | 9            | 2             | 13                | 10                | 1               | 8        | 7               | 14                   | 18                              | 22             | 16                         | 12             | 20                                   | 21            | 24                   | 19             | 17            | 11               | 15             | 23                     | 29                 | 25                      | 26                       | 31                      | 30             | 27                        | 33           | 32               | 28                       | 34                |
| Belize                           | 1                                   | 5              | 4                       | 6            | 8             | 15                | 9                 | 2               | 10       | 3               | 13                   | 12                              | 18             | 19                         | 20             | 17                                   | 21            | 25                   | 11             | 16            | 22               | 14             | 29                     | 30                 | 28                      | 23                       | 24                      | 31             | 33                        | 27           | 26               | 32                       | 34                |
| Barbados                         | 4                                   | 5              | 2                       | 12           | 3             | 14                | 7                 | 1               | 8        | 9               | 11                   | 17                              | 18             | 21                         | 16             | 20                                   | 19            | 24                   | 15             | 23            | 10               | 13             | 22                     | 28                 | 26                      | 27                       | 31                      | 25             | 30                        | 33           | 32               | 29                       | 34                |
| Saint Lucia                      | 3                                   | 5              | 4                       | 11           | 2             | 13                | 8                 | 1               | 9        | 7               | 10                   | 20                              | 15             | 17                         | 16             | 22                                   | 21            | 24                   | 14             | 19            | 12               | 18             | 23                     | 26                 | 27                      | 29                       | 30                      | 25             | 28                        | 34           | 31               | 32                       | 33                |
| Saint Vincent and the Grenadines | 4                                   | 6              | 3                       | 10           | 2             | 20                | 11                | 1               | 8        | 5               | 9                    | 17                              | 18             | 14                         | 15             | 21                                   | 23            | 24                   | 12             | 16            | 19               | 13             | 25                     | 29                 | 26                      | 22                       | 30                      | 28             | 27                        | 33           | 31               | 32                       | 34                |
| Grenada                          | 4                                   | 8              | 2                       | 11           | 3             | 12                | 9                 | 1               | 10       | 7               | 6                    | 16                              | 19             | 18                         | 17             | 20                                   | 23            | 25                   | 14             | 21            | 15               | 13             | 22                     | 30                 | 26                      | 27                       | 29                      | 24             | 28                        | 32           | 33               | 31                       | 34                |
| Antigua and Barbuda              | 4                                   | 5              | 3                       | 8            | 2             | 16                | 10                | 1               | 7        | 9               | 12                   | 15                              | 17             | 19                         | 13             | 20                                   | 22            | 26                   | 11             | 21            | 14               | 18             | 23                     | 28                 | 25                      | 24                       | 29                      | 27             | 32                        | 33           | 31               | 30                       | 34                |
| Dominica                         | 2                                   | 3              | 5                       | 9            | 4             | 14                | 8                 | 1               | 7        | 11              | 10                   | 23                              | 15             | 16                         | 19             | 18                                   | 21            | 22                   | 13             | 17            | 12               | 20             | 24                     | 28                 | 27                      | 26                       | 25                      | 32             | 31                        | 33           | 29               | 30                       | 34                |
| Australasia                      | 1                                   | 8              | 2                       | 11           | 4             | 12                | 5                 | 3               | 6        | 25              | 10                   | 13                              | 14             | 22                         | 16             | 21                                   | 15            | 26                   | 27             | 29            | 18               | 23             | 17                     | 30                 | 9                       | 20                       | 28                      | 32             | 24                        | 19           | 33               | 31                       | 34                |
| Australia                        | 1                                   | 7              | 2                       | 11           | 4             | 12                | 5                 | 3               | 6        | 25              | 10                   | 13                              | 14             | 22                         | 16             | 21                                   | 15            | 26                   | 27             | 29            | 18               | 23             | 17                     | 30                 | 9                       | 20                       | 28                      | 32             | 24                        | 19           | 33               | 31                       | 34                |
| New Zealand                      | 1                                   | 9              | 2                       | 12           | 3             | 13                | 5                 | 4               | 6        | 25              | 10                   | 11                              | 17             | 24                         | 16             | 20                                   | 14            | 28                   | 26             | 29            | 15               | 21             | 18                     | 31                 | 8                       | 19                       | 27                      | 32             | 23                        | 22           | 33               | 30                       | 34                |
| Oceania                          | 1                                   | 3              | 6                       | 5            | 2             | 17                | 11                | 9               | 8        | 4               | 12                   | 16                              | 22             | 14                         | 19             | 24                                   | 29            | 18                   | 13             | 21            | 23               | 10             | 15                     | 20                 | 31                      | 25                       | 27                      | 28             | 34                        | 33           | 30               | 26                       | 32                |
| Papua New Guinea                 | 1                                   | 3              | 5                       | 8            | 2             | 20                | 12                | 9               | 6        | 4               | 13                   | 15                              | 23             | 16                         | 19             | 25                                   | 30            | 14                   | 11             | 21            | 26               | 10             | 17                     | 18                 | 31                      | 24                       | 27                      | 28             | 34                        | 33           | 29               | 22                       | 32                |
| Fiji                             | 6                                   | 9              | 4                       | 3            | 1             | 15                | 11                | 8               | 7        | 2               | 13                   | 16                              | 17             | 14                         | 19             | 23                                   | 26            | 22                   | 18             | 24            | 20               | 12             | 10                     | 29                 | 27                      | 28                       | 25                      | 21             | 34                        | 33           | 32               | 30                       | 31                |
| Solomon Islands                  | 1                                   | 4              | 6                       | 3            | 2             | 15                | 11                | 9               | 8        | 5               | 12                   | 17                              | 22             | 14                         | 19             | 26                                   | 28            | 18                   | 13             | 21            | 24               | 10             | 16                     | 20                 | 31                      | 23                       | 27                      | 29             | 34                        | 33           | 30               | 25                       | 32                |
| Vanuatu                          | 1                                   | 3              | 5                       | 6            | 2             | 18                | 10                | 9               | 8        | 4               | 12                   | 16                              | 22             | 14                         | 17             | 25                                   | 28            | 20                   | 13             | 21            | 24               | 11             | 15                     | 19                 | 30                      | 23                       | 26                      | 29             | 34                        | 32           | 31               | 27                       | 33                |
| Samoa                            | 4                                   | 2              | 3                       | 7            | 1             | 21                | 8                 | 5               | 10       | 9               | 11                   | 14                              | 18             | 25                         | 13             | 26                                   | 27            | 23                   | 16             | 28            | 19               | 12             | 20                     | 24                 | 15                      | 22                       | 30                      | 17             | 34                        | 33           | 32               | 29                       | 31                |
| Kiribati                         | 1                                   | 5              | 7                       | 3            | 2             | 12                | 10                | 13              | 8        | 11              | 9                    | 14                              | 26             | 4                          | 16             | 25                                   | 15            | 18                   | 17             | 20            | 28               | 21             | 19                     | 23                 | 30                      | 27                       | 29                      | 32             | 34                        | 33           | 31               | 24                       | 22                |
| Tonga                            | 1                                   | 4              | 7                       | 2            | 3             | 17                | 9                 | 5               | 10       | 6               | 8                    | 15                              | 20             | 13                         | 19             | 26                                   | 25            | 23                   | 21             | 22            | 16               | 14             | 18                     | 24                 | 28                      | 11                       | 27                      | 29             | 32                        | 33           | 31               | 30                       | 34                |
| Federated States of Micronesia   | 1                                   | 4              | 3                       | 5            | 2             | 18                | 10                | 7               | 9        | 8               | 12                   | 14                              | 22             | 15                         | 17             | 25                                   | 28            | 21                   | 16             | 20            | 19               | 11             | 13                     | 23                 | 30                      | 24                       | 26                      | 29             | 34                        | 32           | 31               | 27                       | 33                |
| Marshall Islands                 | 1                                   | 3              | 4                       | 5            | 2             | 17                | 10                | 9               | 7        | 8               | 11                   | 15                              | 23             | 16                         | 21             | 26                                   | 28            | 20                   | 14             | 19            | 22               | 12             | 13                     | 18                 | 29                      | 25                       | 24                      | 30             | 34                        | 33           | 31               | 27                       | 32                |

Colors correspond to the ranking, with dark red as the most common cancer and dark green as the least common cancer for the location indicated. Rankings do not include the “other cancer” group. The numbers inside each box indicate the ranking. Abbreviations: SSA: Sub-Saharan Africa; DRC: Democratic Republic of Congo; CAR: Central African Republic

eFigure 16: Cancer ranking by total mortality based on global level for developing and developed regions and all countries, both sexes, 2016

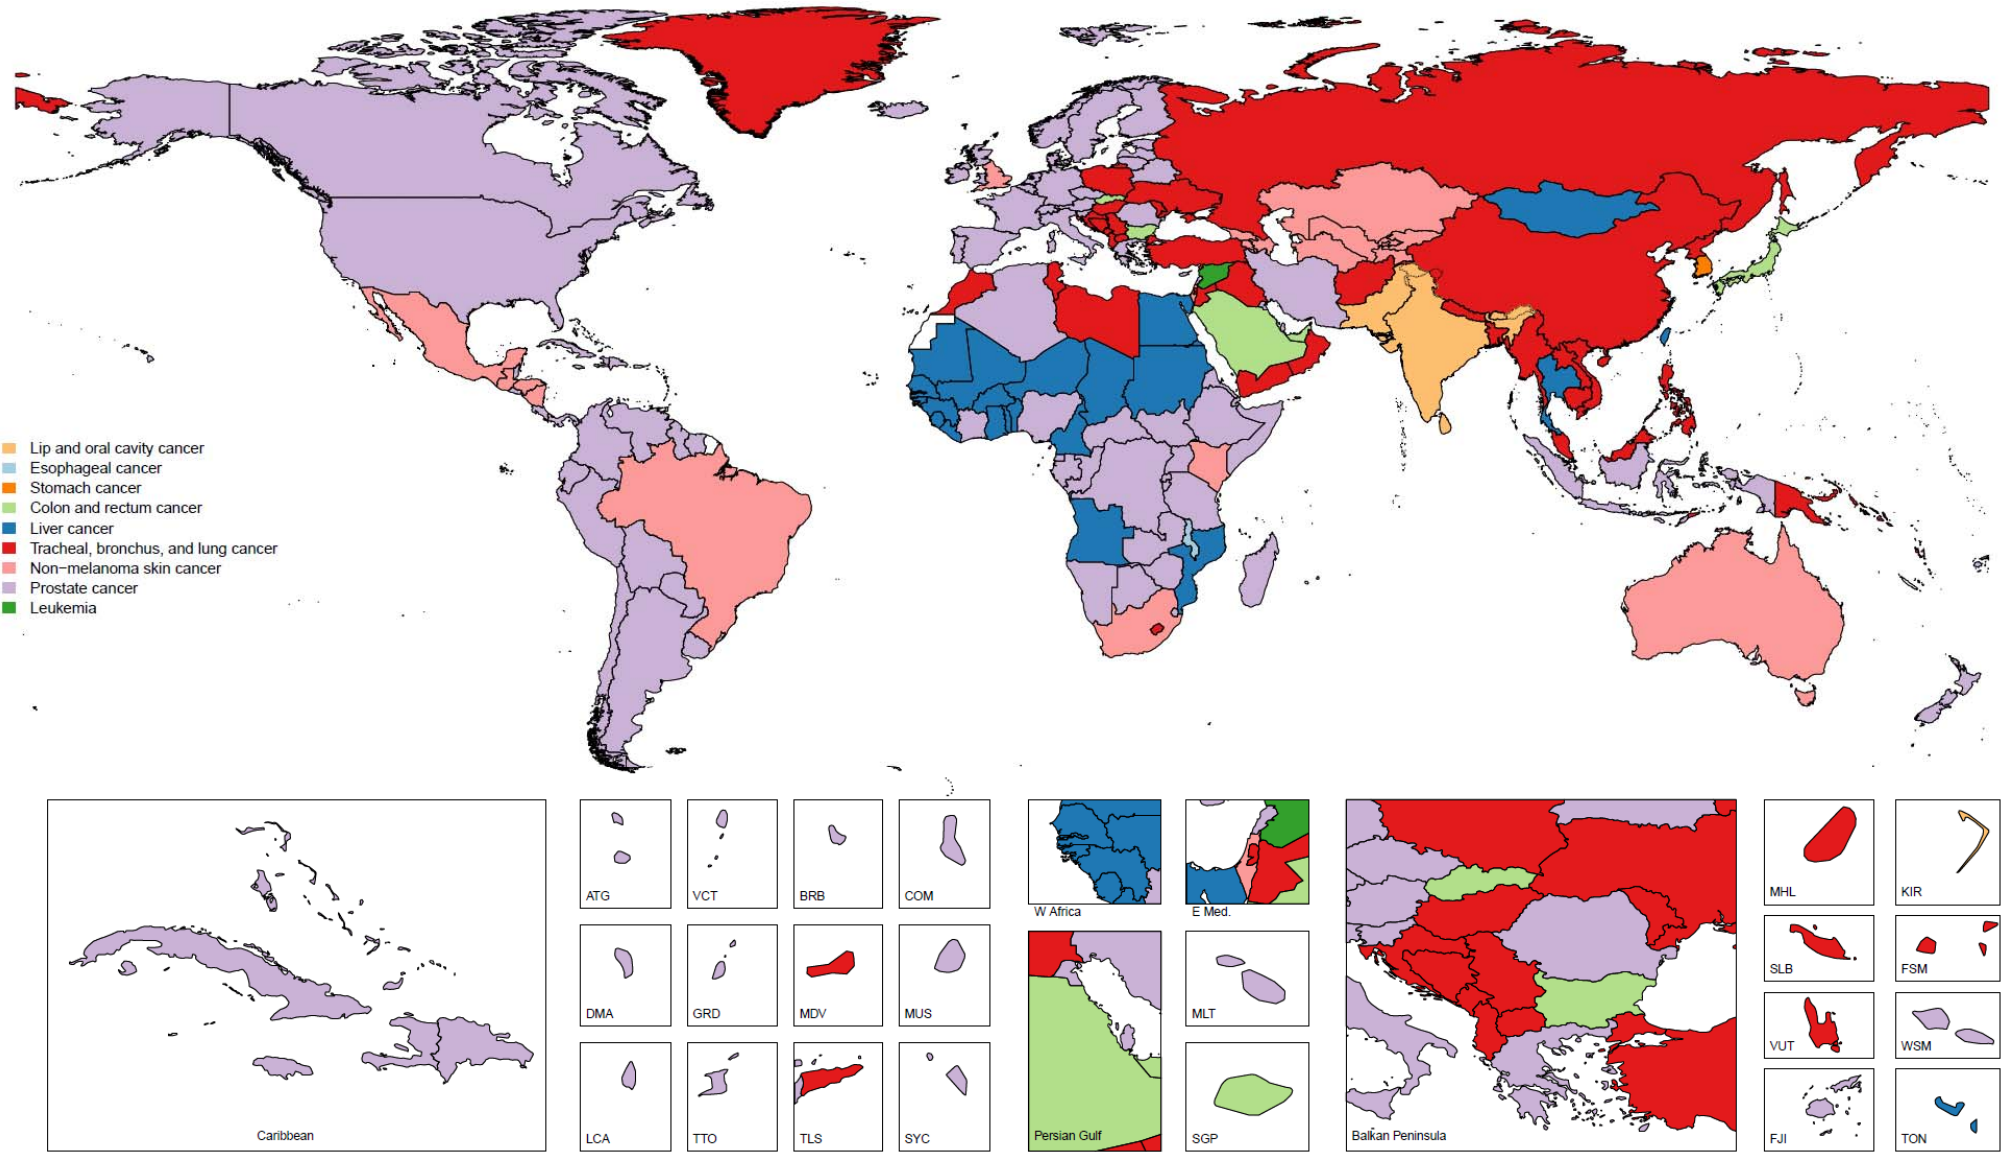

eFigure 17: Top-ranked cancers by absolute incident cases for all ages in males, 2016

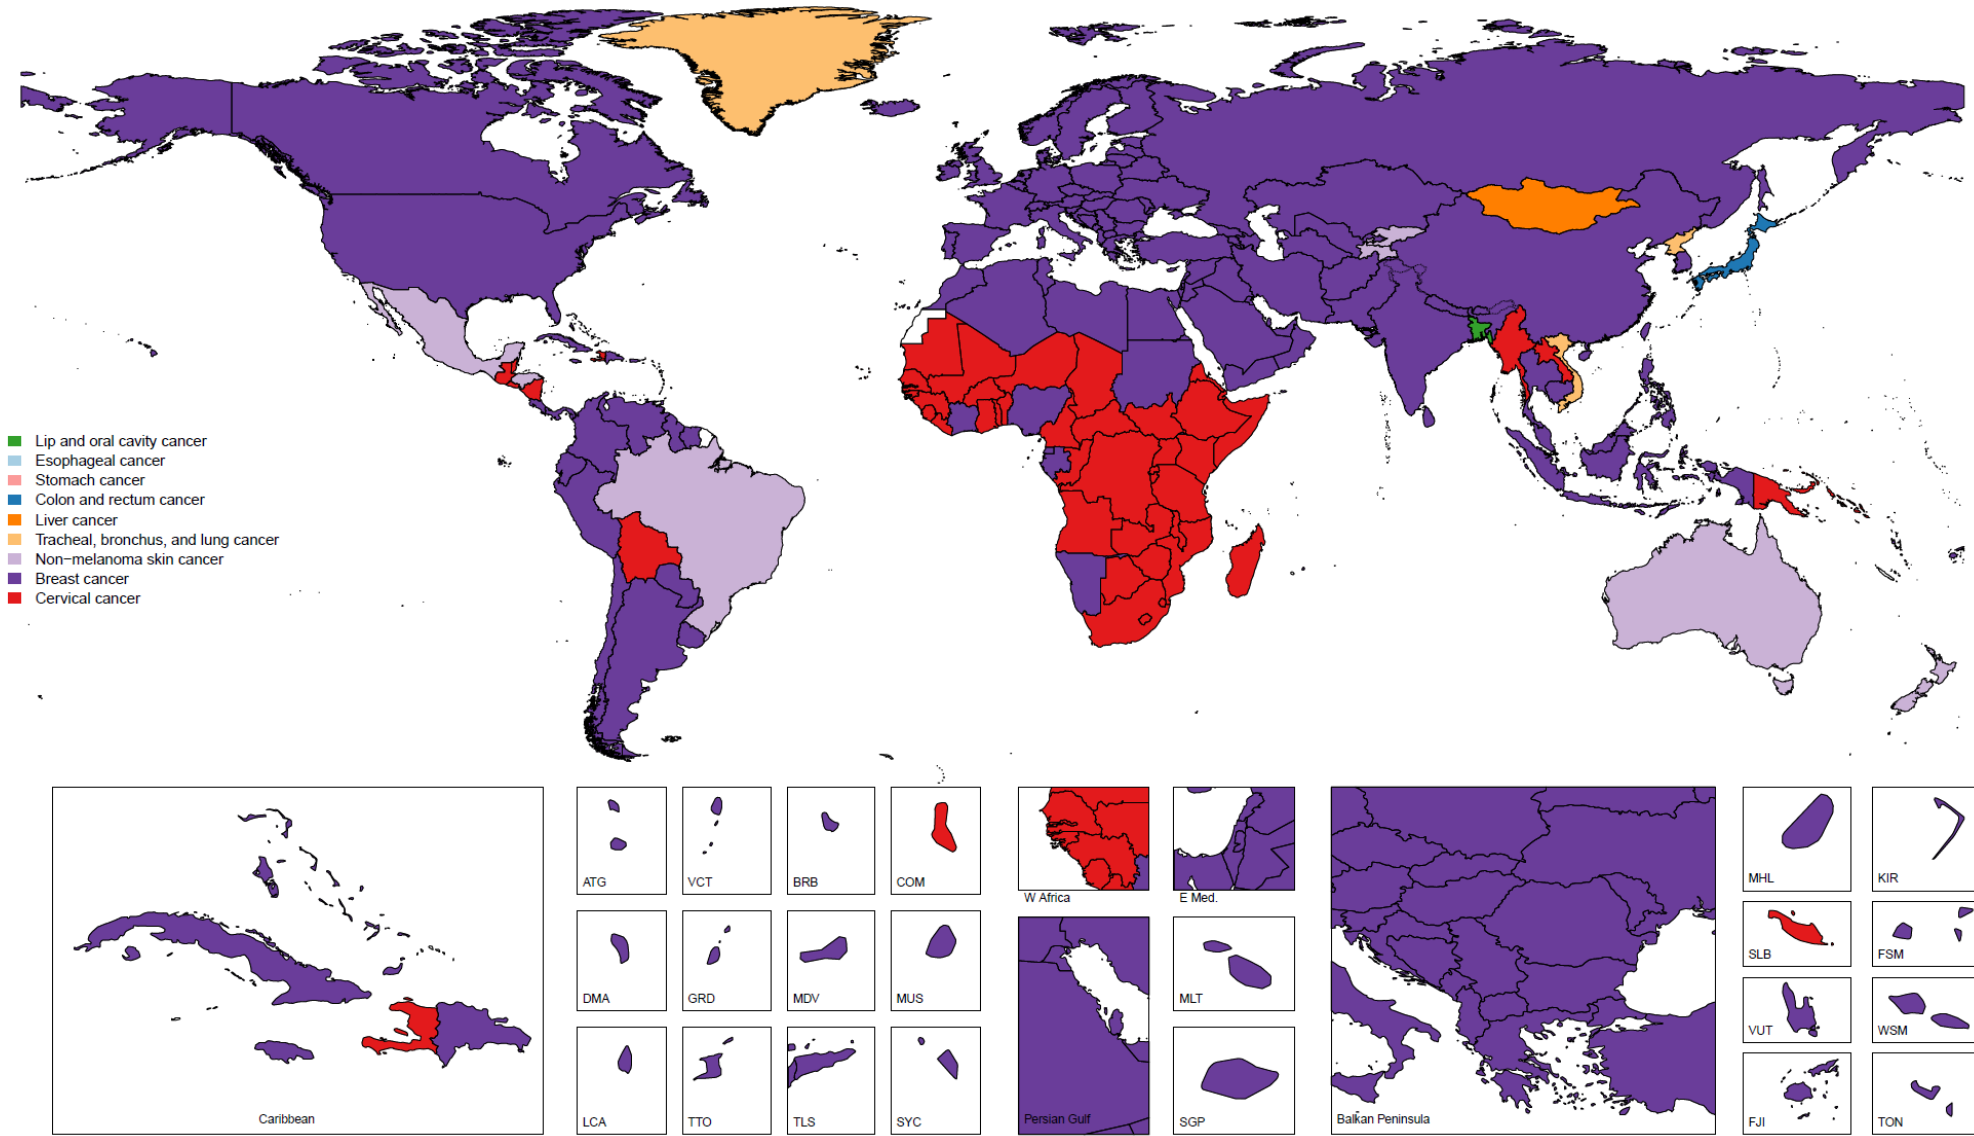

*eFigure 18: Top-ranked cancers by absolute incident cases for all ages in females, 2016*



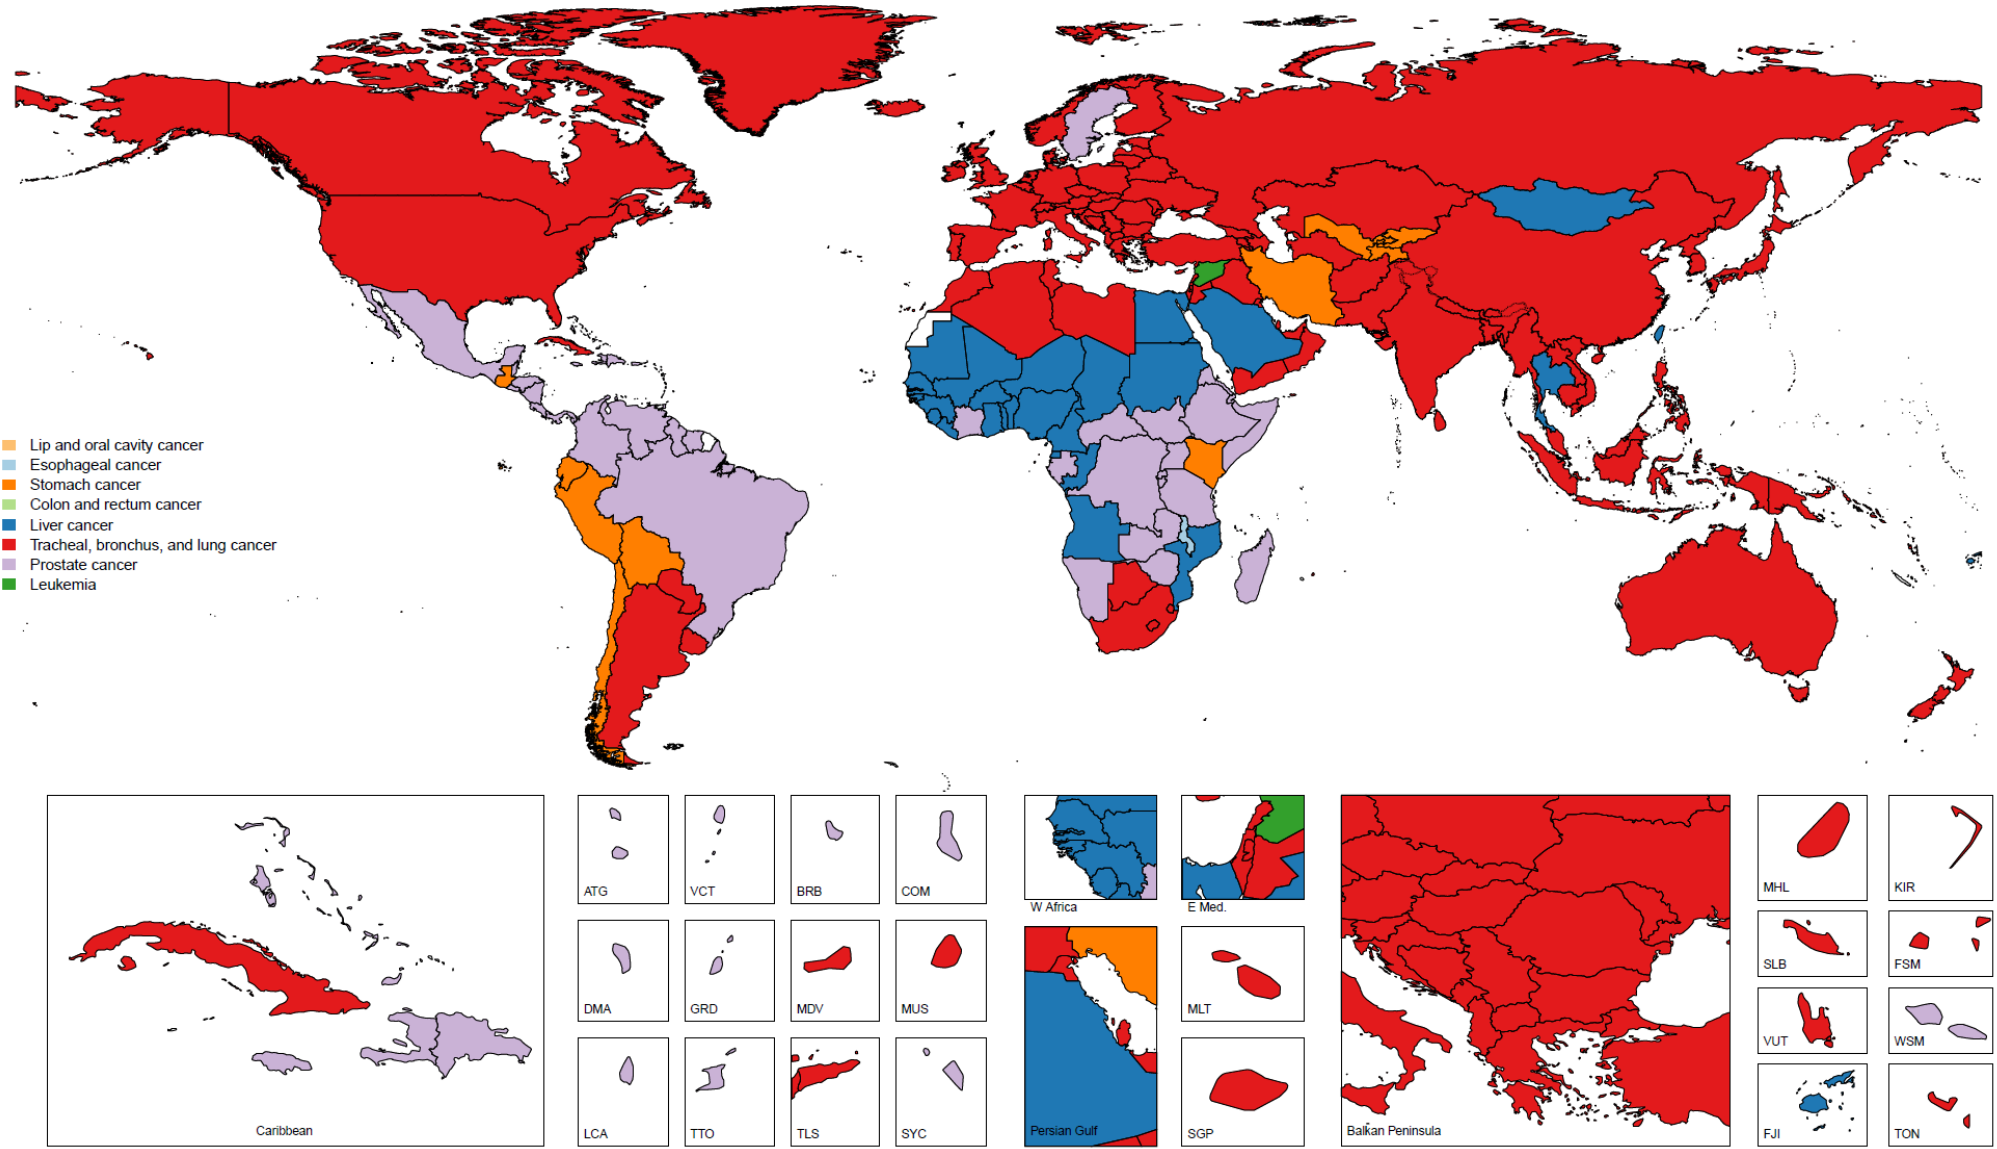

eFigure 19: Top-ranked cancers by absolute deaths for all ages in males, 2016

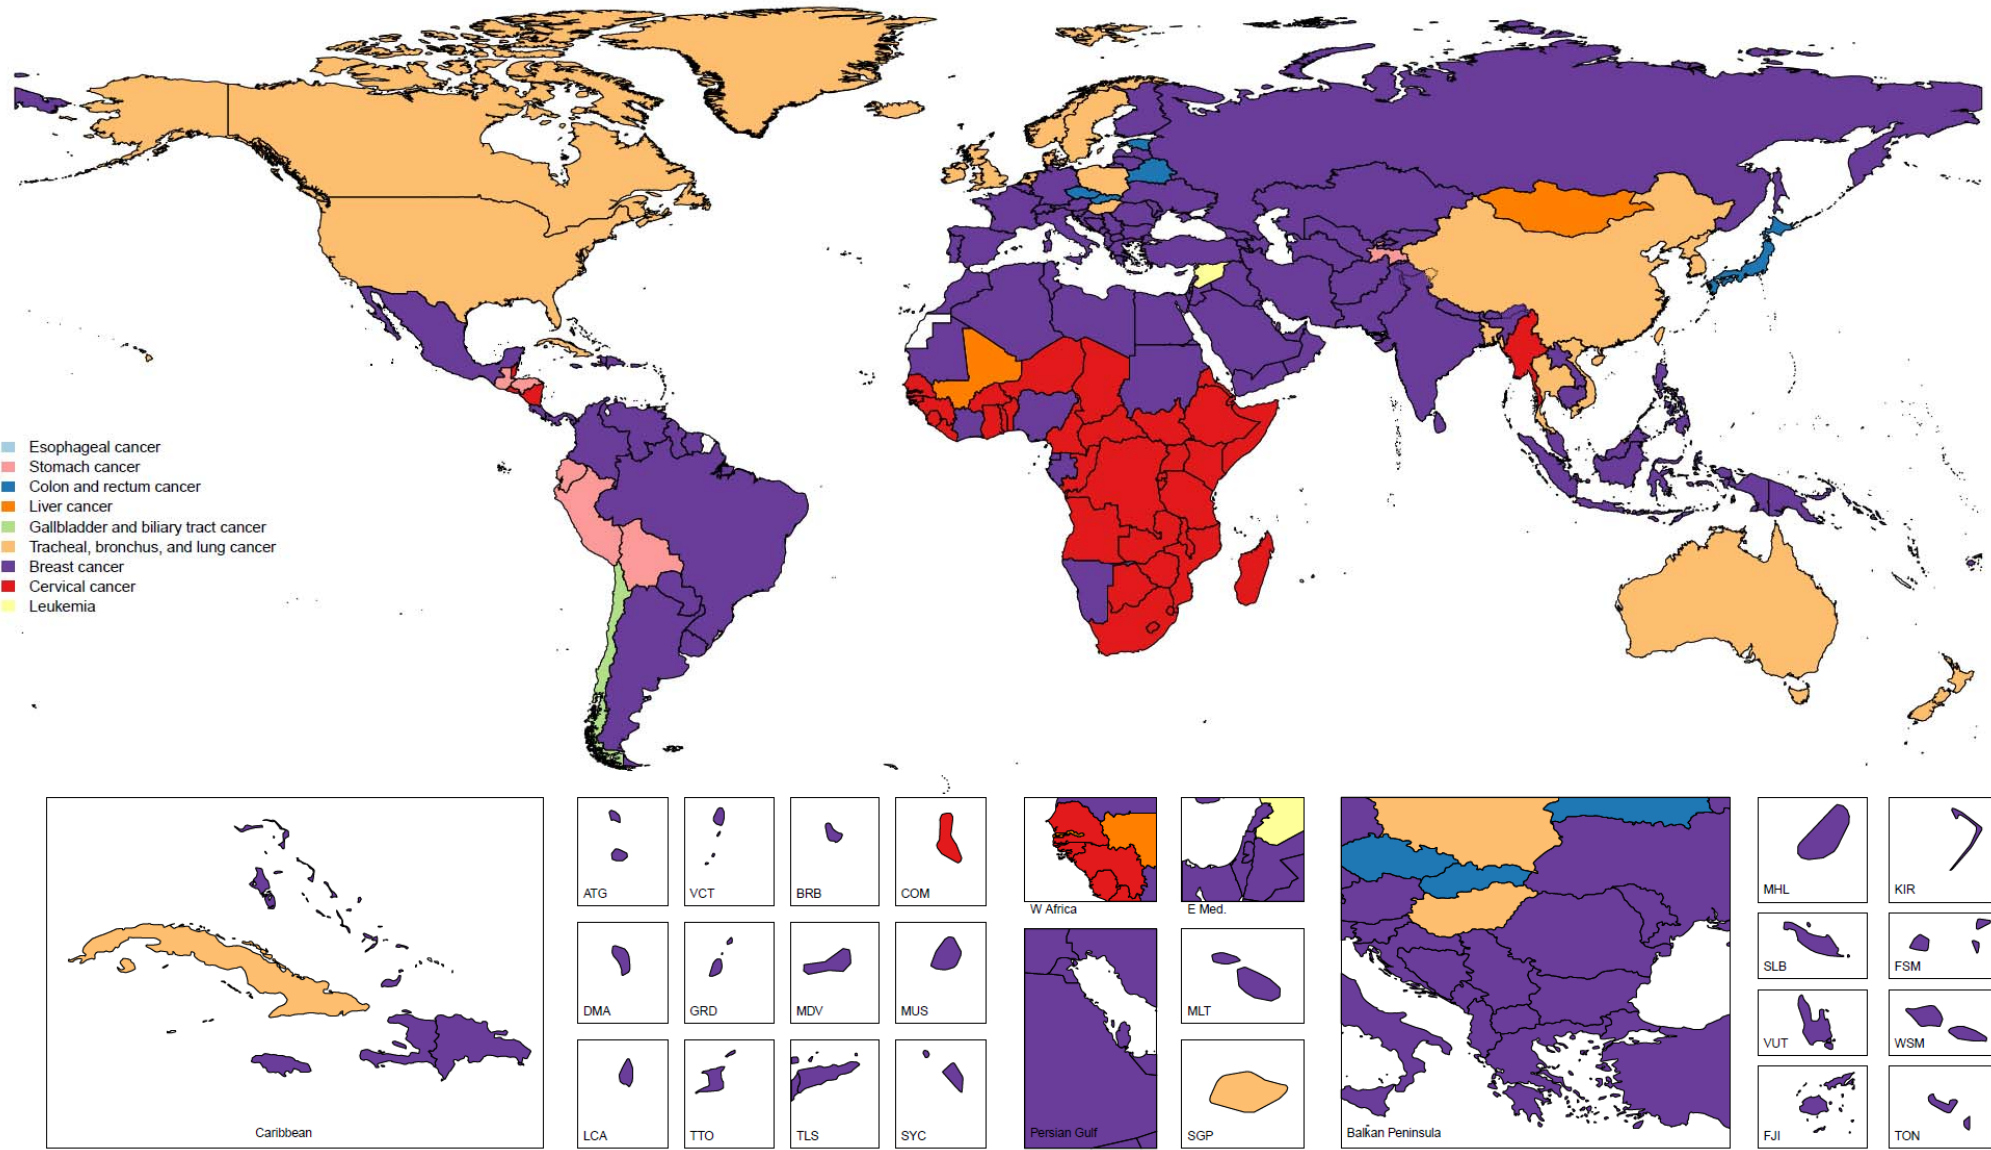

eFigure 20: Top-ranked cancers by absolute deaths for all ages in females, 2016

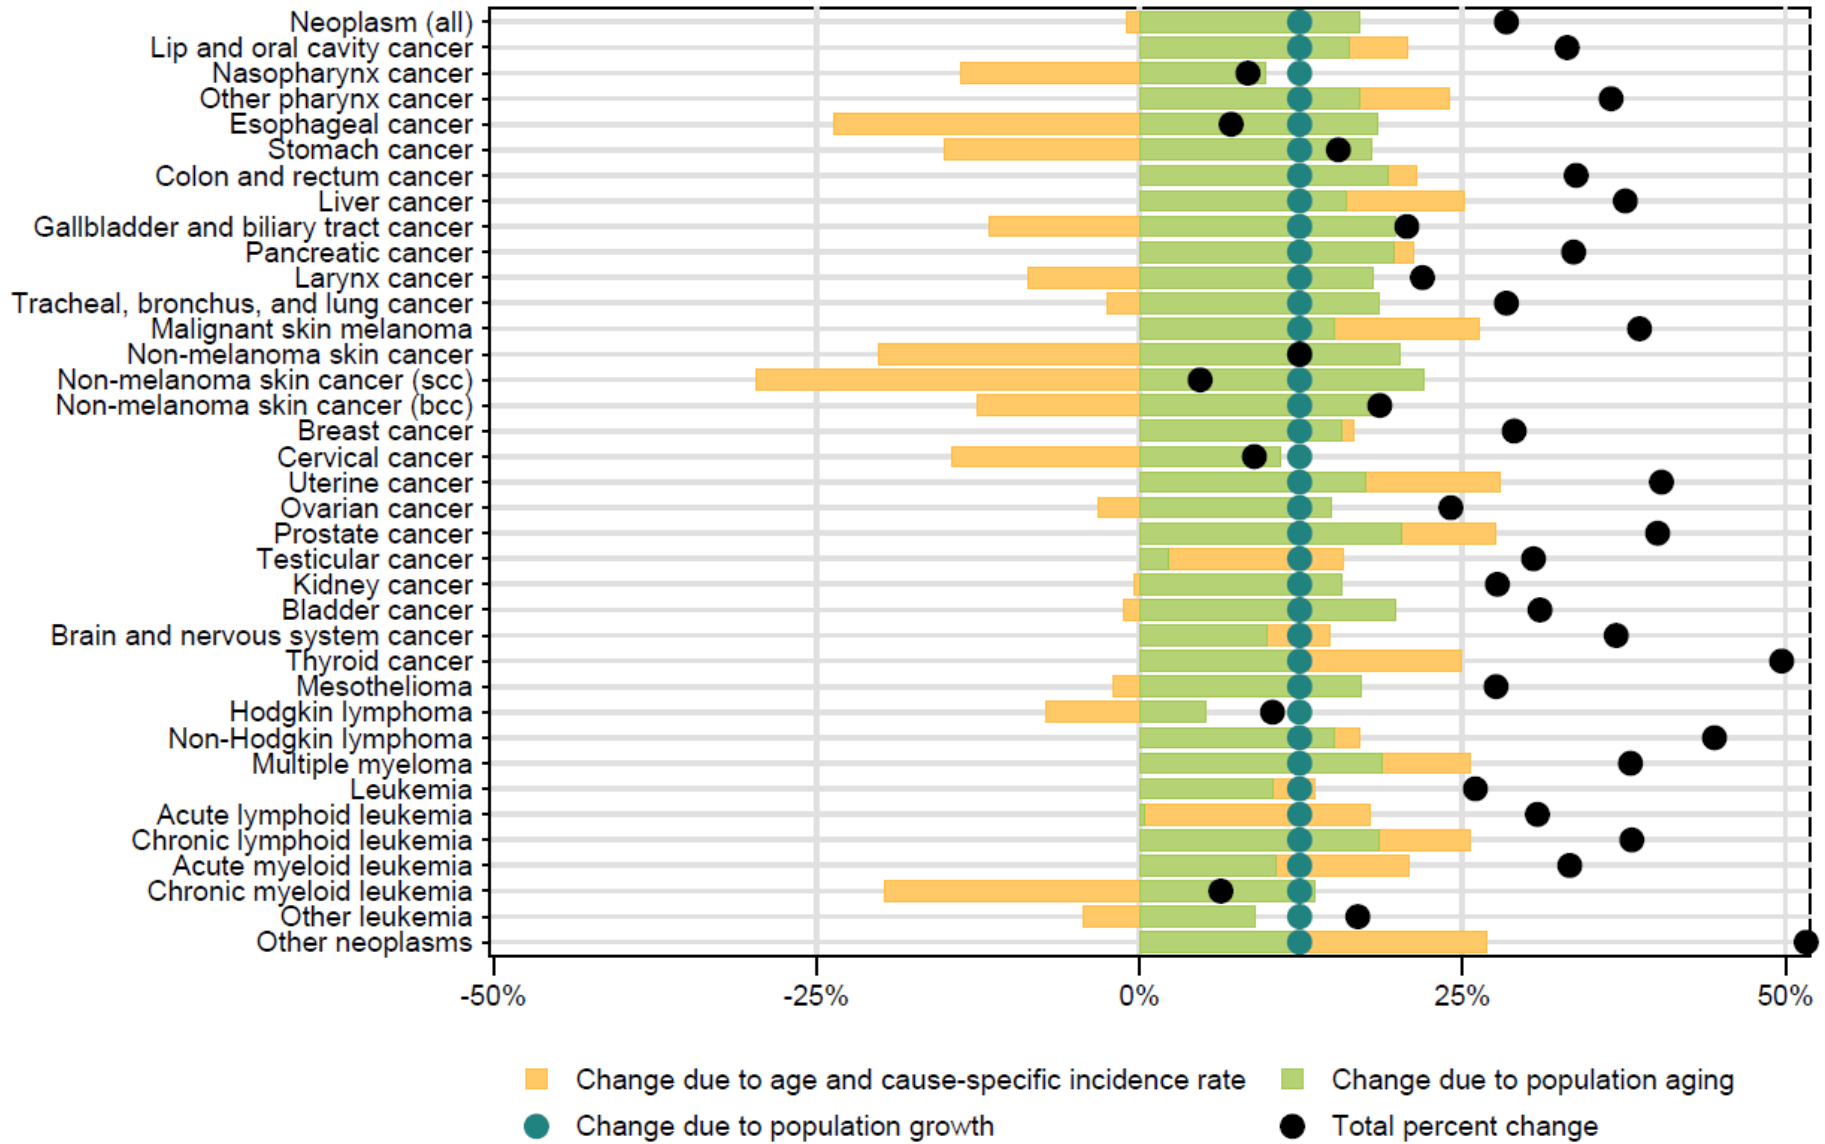

eFigure 21: Global Decomposition of Changes in Cancer Incident Cases due to Population Growth, Population Aging, and Changes in Age-specific Incidence Rates, Both Sexes, 2006 to 2016. Results are also presented in eTable 14. To estimate the effect of population growth we applied the population size of 2016 onto the rate, sex, and age structure of 2006. Since the global population grew by 12.4% between 2006 and 2016, and rates and age structure remained the same as in 2006, incidence due to all cancers increased by 12.4% in this counterfactual scenario. To estimate the effect of aging on incident cases we applied the age structure of 2016 onto the rate, sex distribution, and population size of 2006. The change in incident cases reported herein shows the proportion of the change in incident cases between 2006 and 2016 that can be attributed to the changing age structure of the population. To estimate the effect of changing incidence rates on the incident cases we applied the incidence rates for 2006 onto the population size and age structure of 2006. The change in incident cases reported herein shows the proportion of the change in incident cases between 2006 and 2016 that can be attributed to a change in incidence rates.



For the following figures, the y-axes differ in scale between male and female graphs and by cancer.

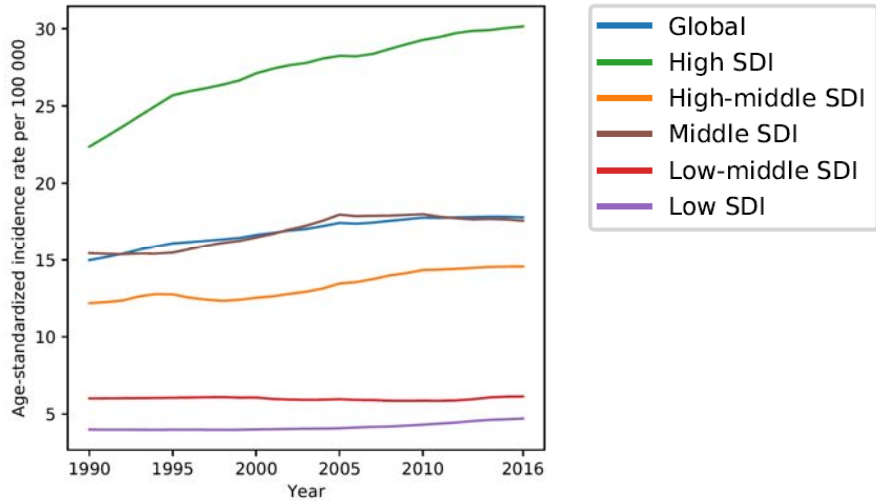

eFigure 22: Trends in Age-Standardized Incidence Rates for Tracheal, Bronchus, and Lung Cancer, 1990-2016, Female

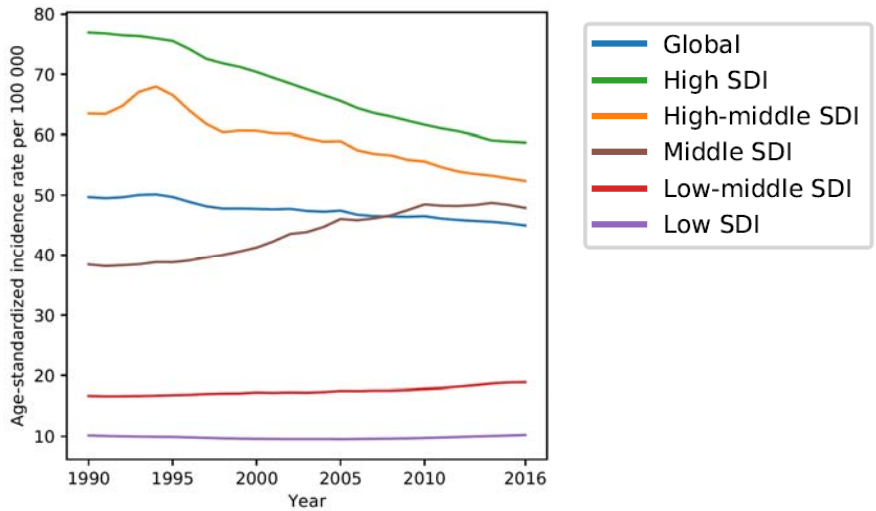

eFigure 23: Trends in Age-Standardized Incidence Rates for Tracheal, Bronchus, and Lung Cancer, 1990-2016, Male

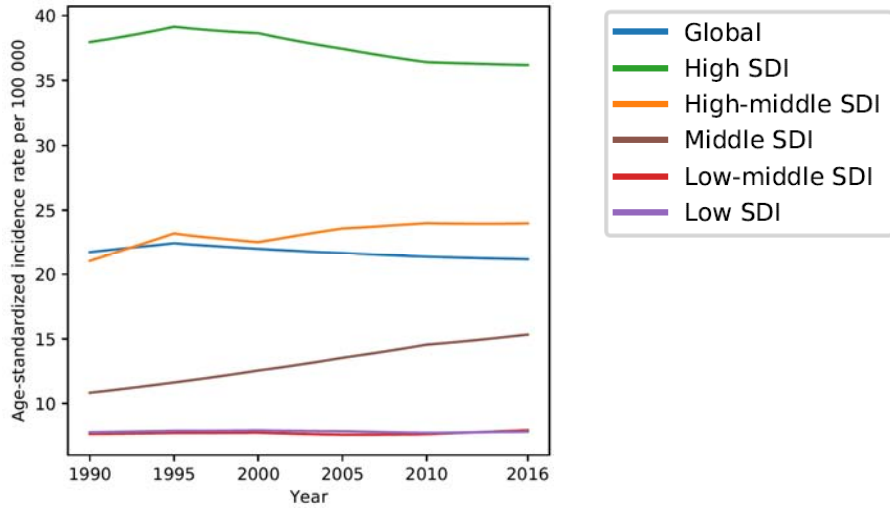

Figure 24: Trends in Age-Standardized Incidence Rates for Colon and Rectum Cancer, 1990-2016, Female

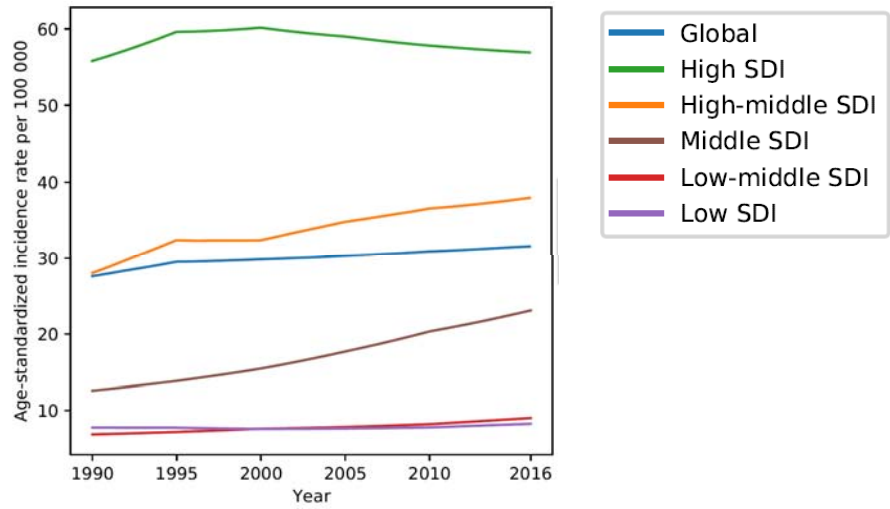

Figure 25: Trends in Age-Standardized Incidence Rates for Colon and Rectum Cancer, 1990-2016, Male

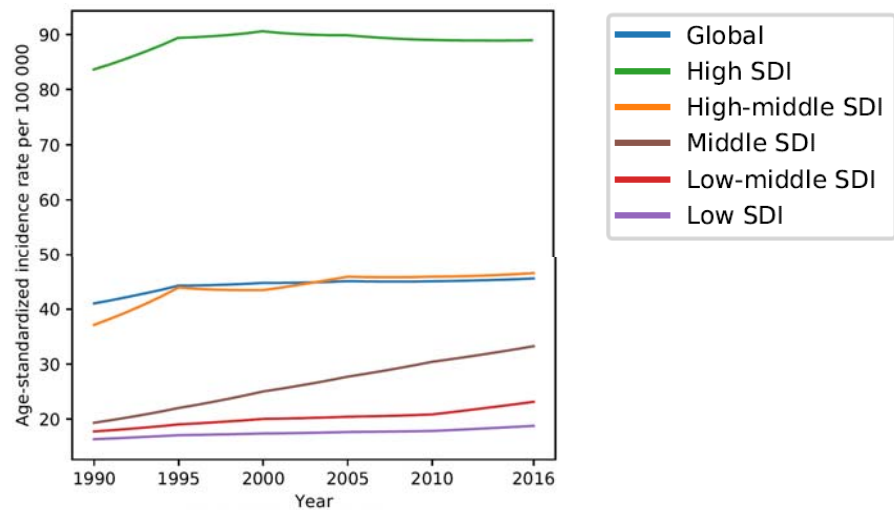

eFigure 26: Trends in Age-Standardized Incidence Rates for Breast Cancer, 1990-2016, Female

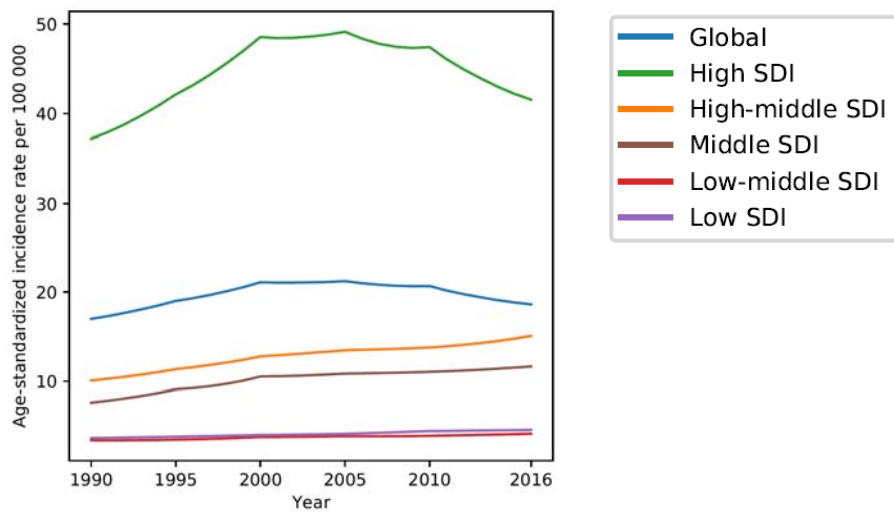

eFigure 27: Trends in Age-Standardized Incidence Rates for NMSC, 1990-2016, Female

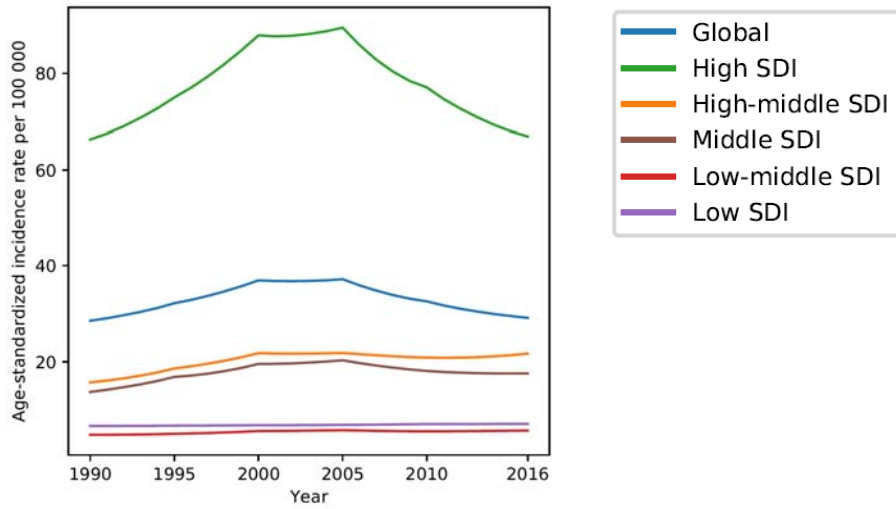

eFigure 28: Trends in Age-Standardized Incidence Rates for NMSC, 1990-2016, Male

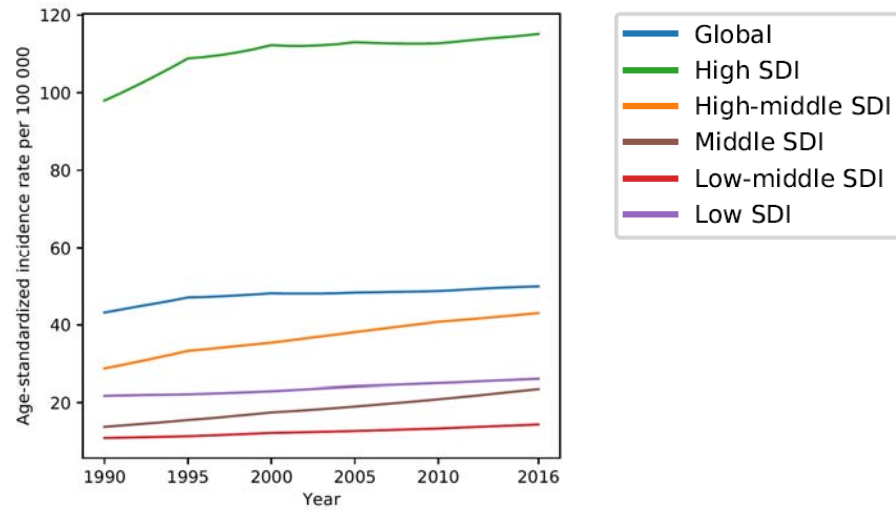

eFigure 29: Trends in Age-Standardized Incidence Rates for Prostate Cancer, 1990-2016, Male

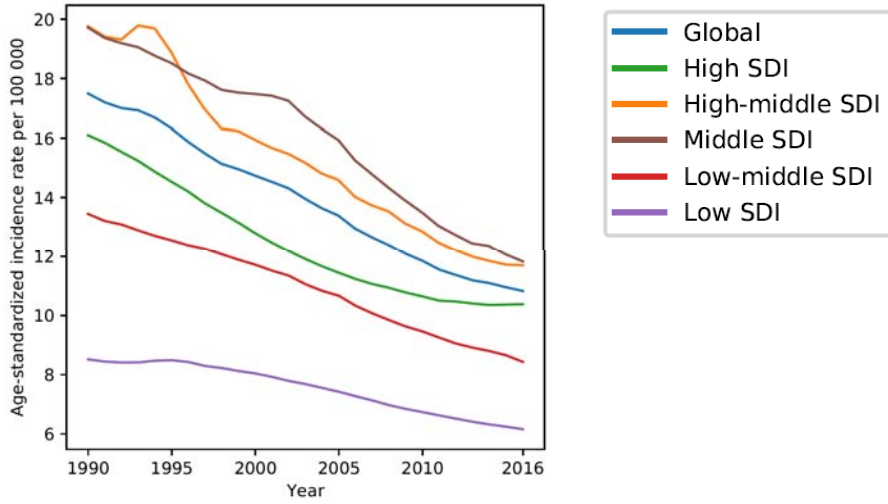

eFigure 30: Trends in Age-Standardized Incidence Rates for Stomach Cancer, 1990-2016, Female

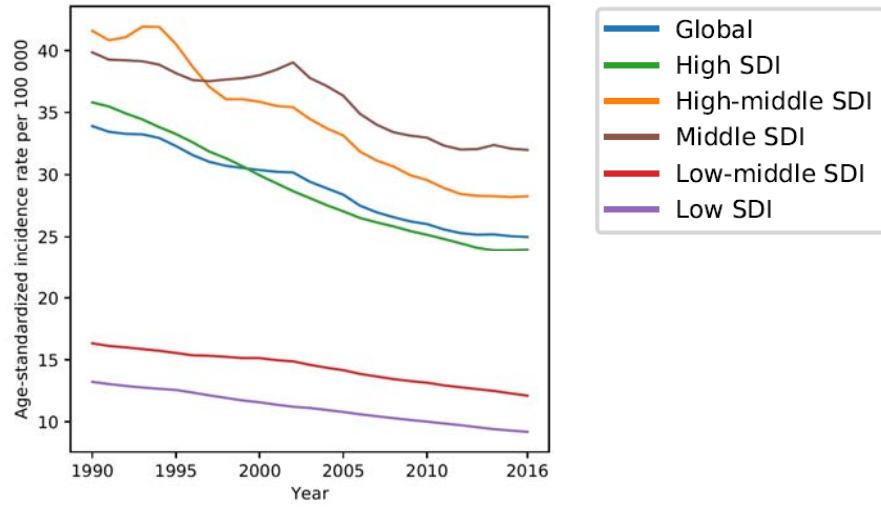

eFigure 31: Trends in Age-Standardized Incidence Rates for Stomach Cancer, 1990-2016, Male

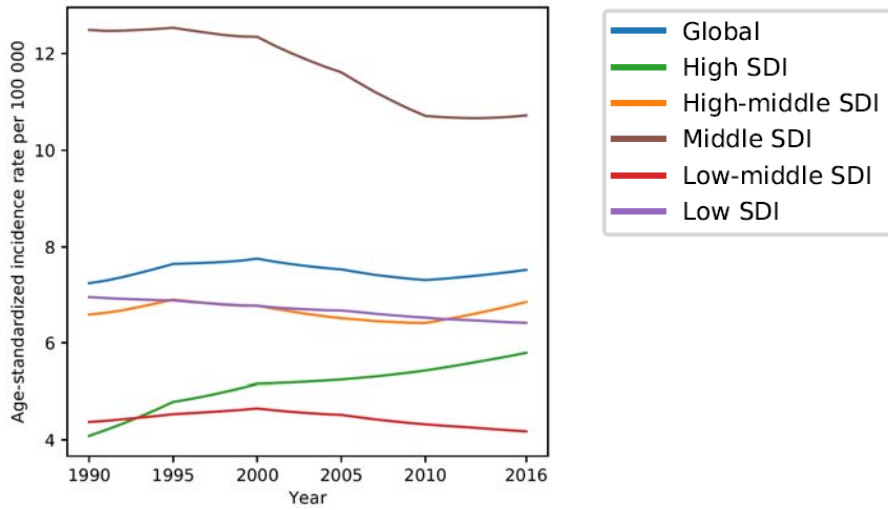

eFigure 32: Trends in Age-Standardized Incidence Rates for Liver Cancer, 1990-2016, Female

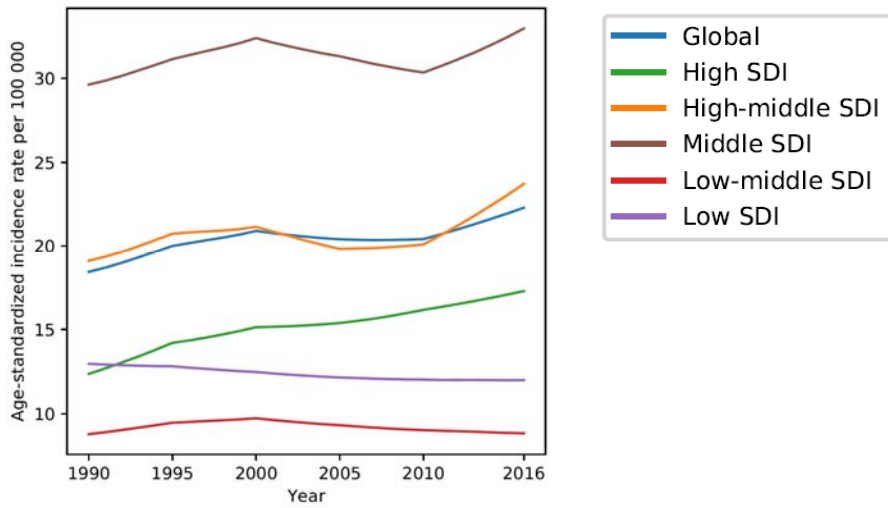

eFigure 33: Trends in Age-Standardized Incidence Rates for Liver Cancer, 1990-2016, Male

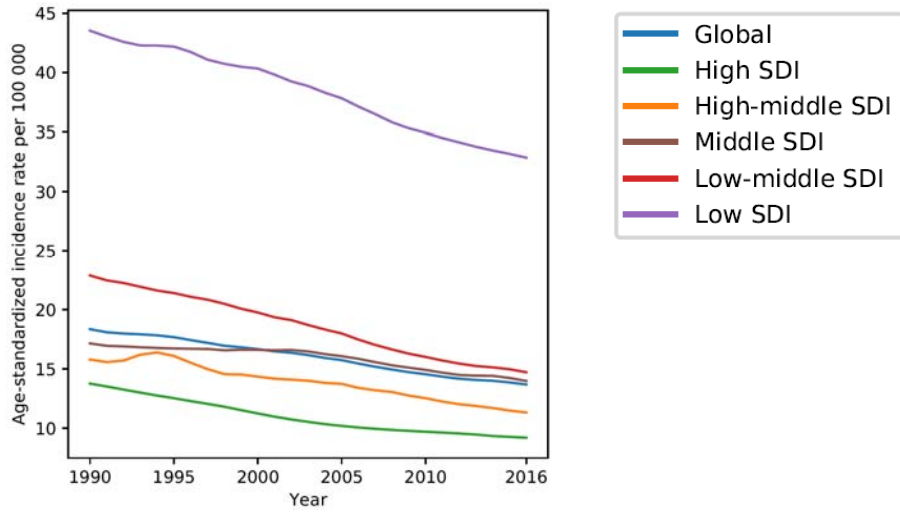

eFigure 34: Trends in Age-Standardized Incidence Rates for Cervical Cancer, 1990-2016, Female

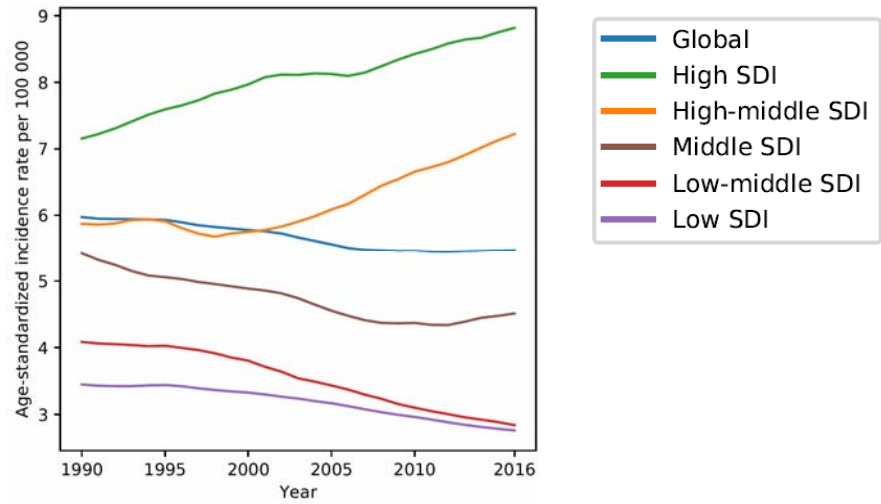

eFigure 35: Trends in Age-Standardized Incidence Rates for Leukemia, 1990-2016, Female

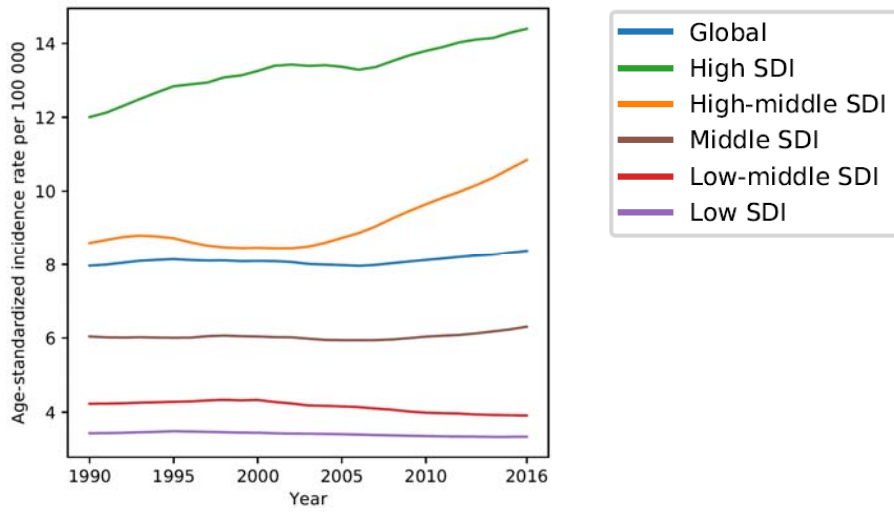

eFigure 36: Trends in Age-Standardized Incidence Rates for Leukemia, 1990-2016, Male

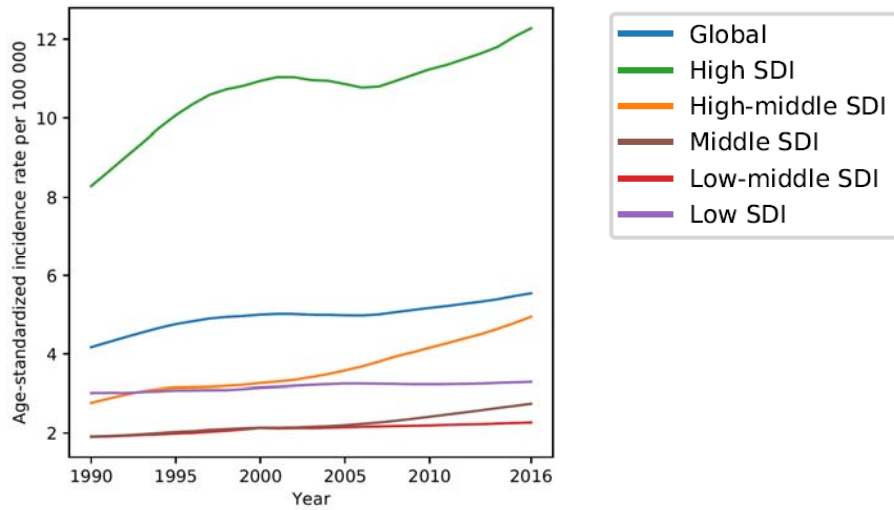

eFigure 37: Trends in Age-Standardized Incidence Rates for Non-Hodgkin lymphoma, 1990-2016, Female



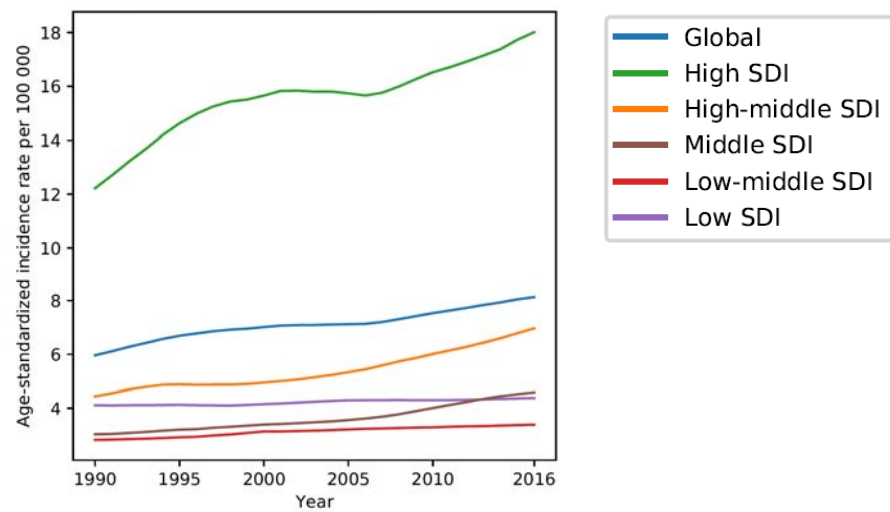

Figure 38: Trends in Age-Standardized Incidence Rates for Non-Hodgkin lymphoma, 1990-2016, Male

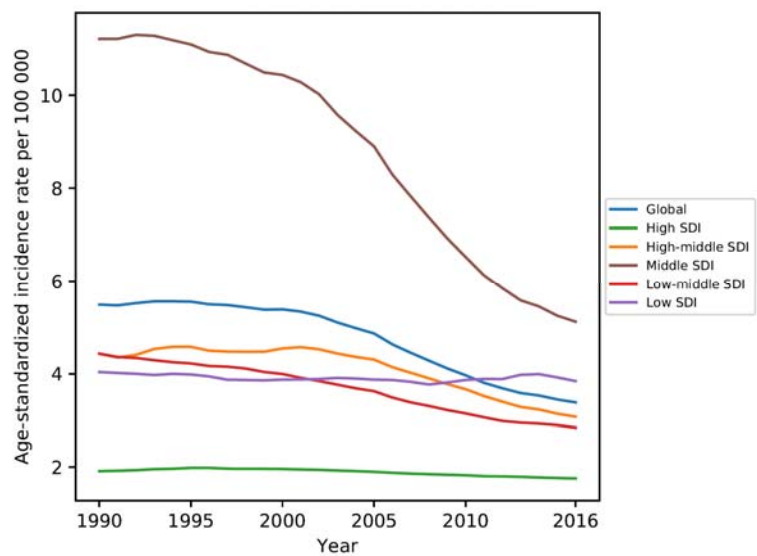

eFigure 39: Trends in Age-Standardized Incidence Rates for Esophageal Cancer, 1990-2016, Female

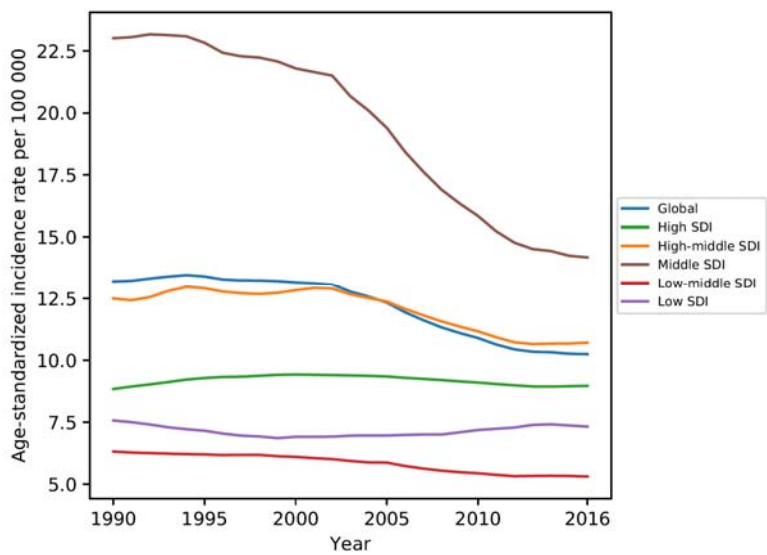

eFigure 40: Trends in Age-Standardized Incidence Rates for Esophageal Cancer, 1990-2016, Male

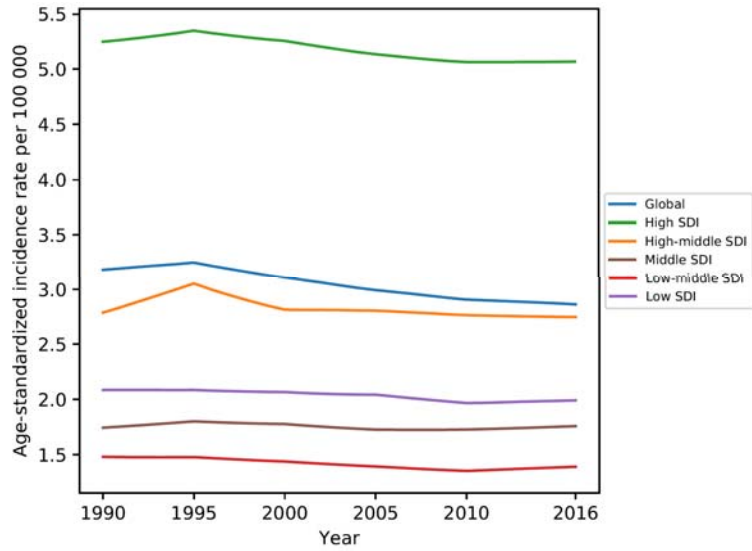

Figure 41: Trends in Age-Standardized Incidence Rates for Bladder Cancer, 1990-2016, Female

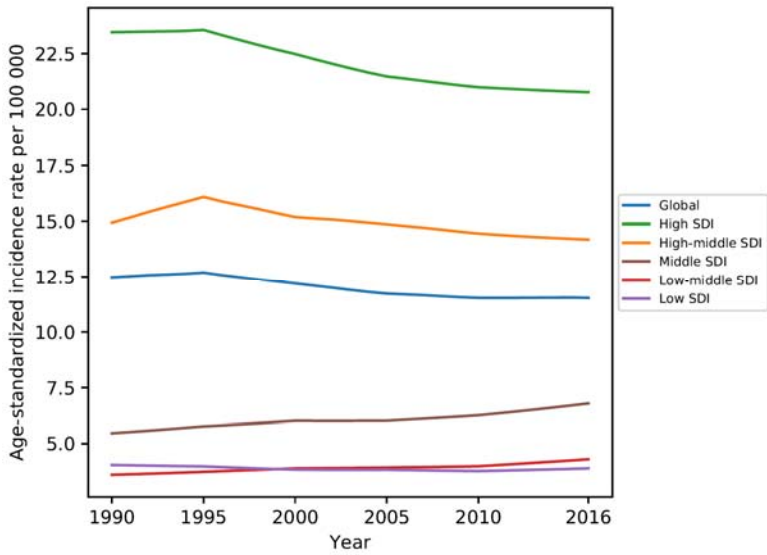

Figure 42: Trends in Age-Standardized Incidence Rates for Bladder Cancer, 1990-2016, Male

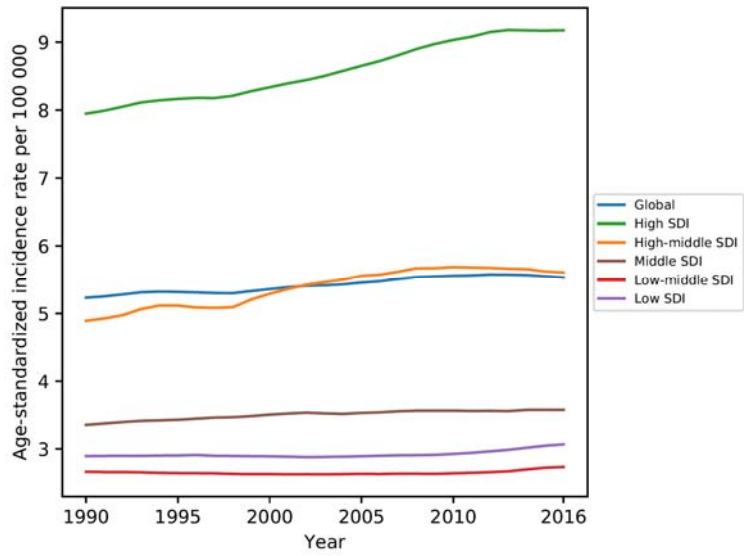

Figure 43: Trends in Age-Standardized Incidence Rates for Pancreatic Cancer, 1990-2016, Female

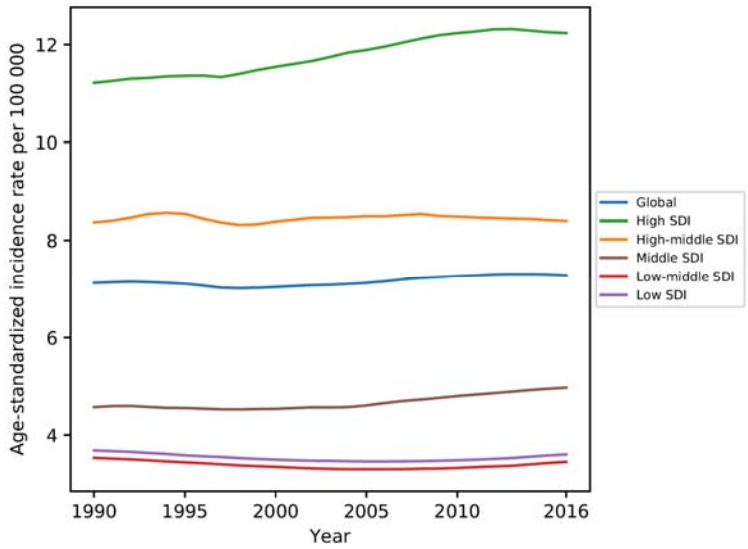

Figure 44: Trends in Age-Standardized Incidence Rates for Pancreatic Cancer, 1990-2016, Male

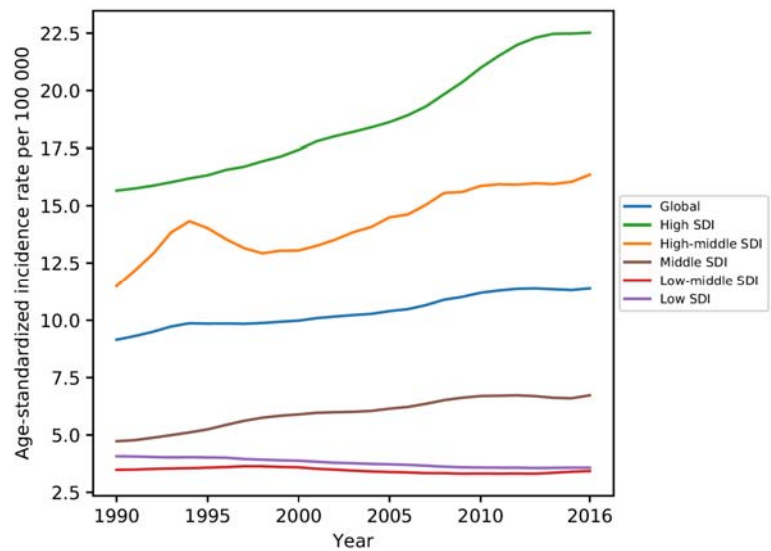

Figure 45: Trends in Age-Standardized Incidence Rates for Uterine Cancer, 1990-2016, Female

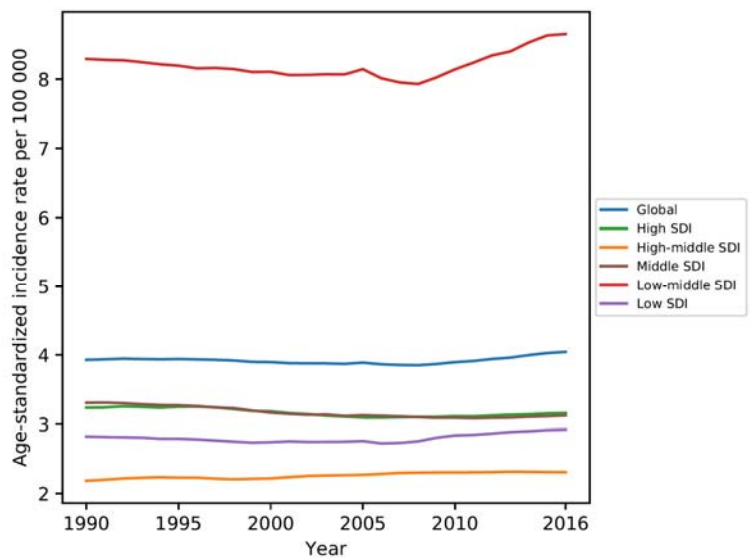

Figure 46: Trends in Age-Standardized Incidence Rates for Lip and oral cavity Cancer, 1990-2016, Female

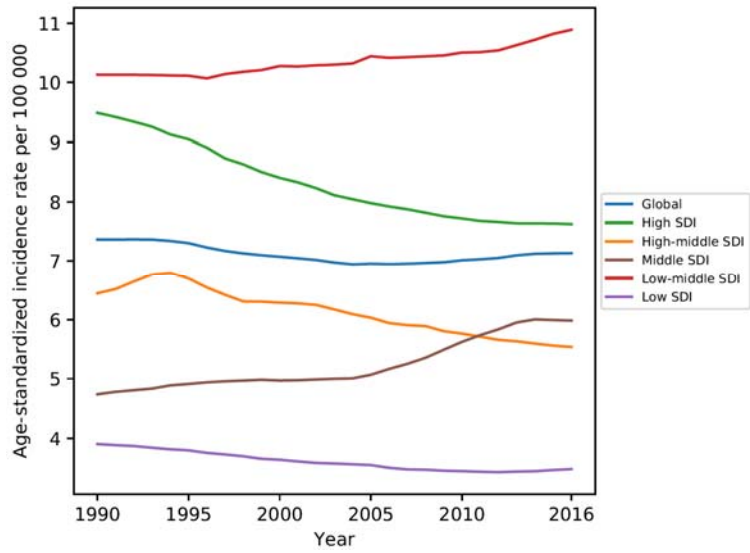

Figure 47: Trends in Age-Standardized Incidence Rates for Lip and oral cavity Cancer, 1990-2016, Male

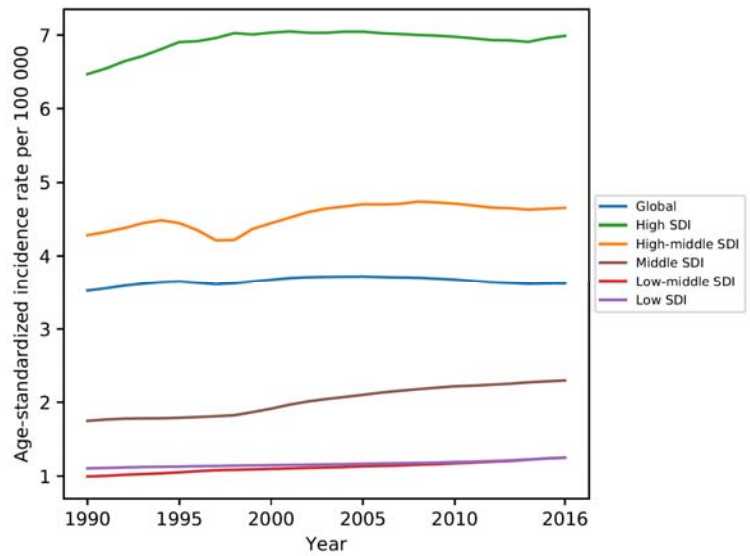

Figure 48: Trends in Age-Standardized Incidence Rates for Kidney Cancer, 1990-2016, Female

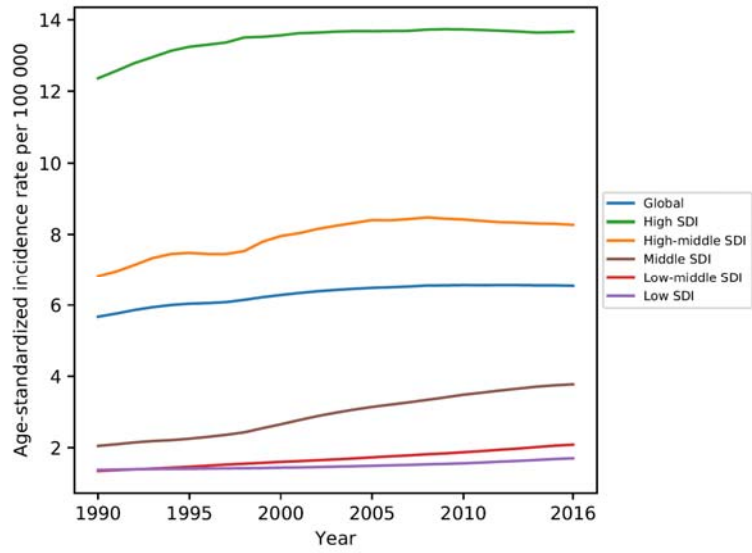

eFigure 49: Trends in Age-Standardized Incidence Rates for Kidney Cancer, 1990-2016, Male

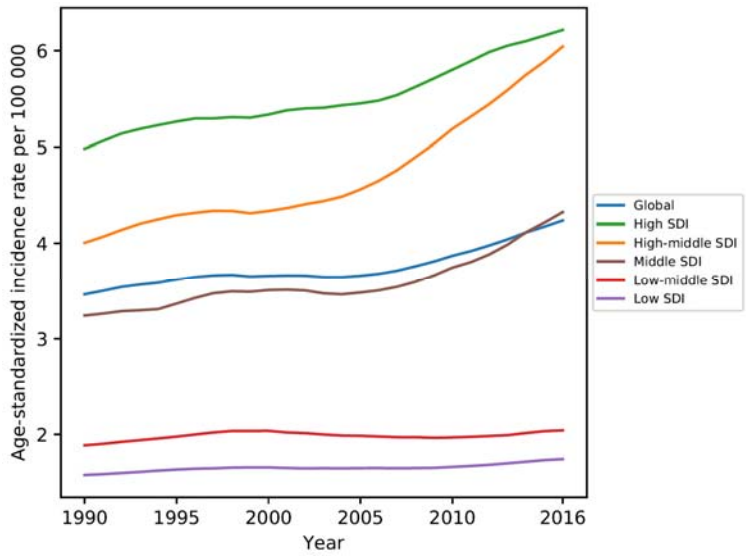

eFigure 50: Trends in Age-Standardized Incidence Rates for Brain and nervous system cancer, 1990-2016, Female

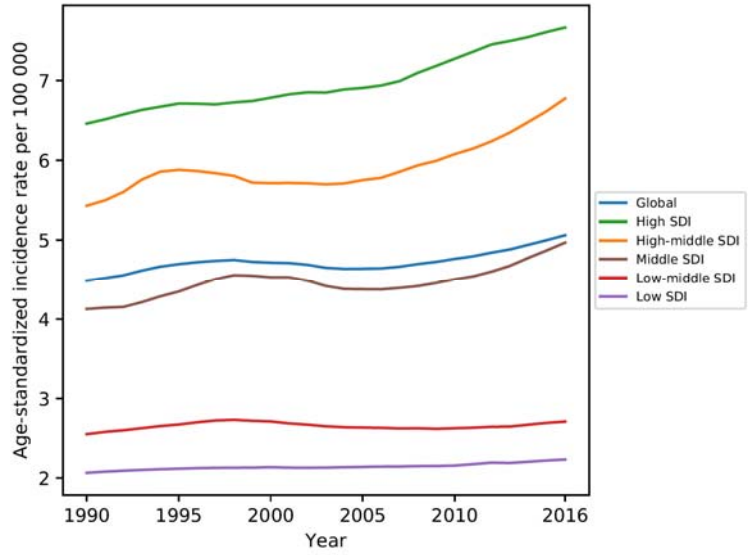

Figure 51: Trends in Age-Standardized Incidence Rates for Brain and nervous system cancer, 1990-2016, Male

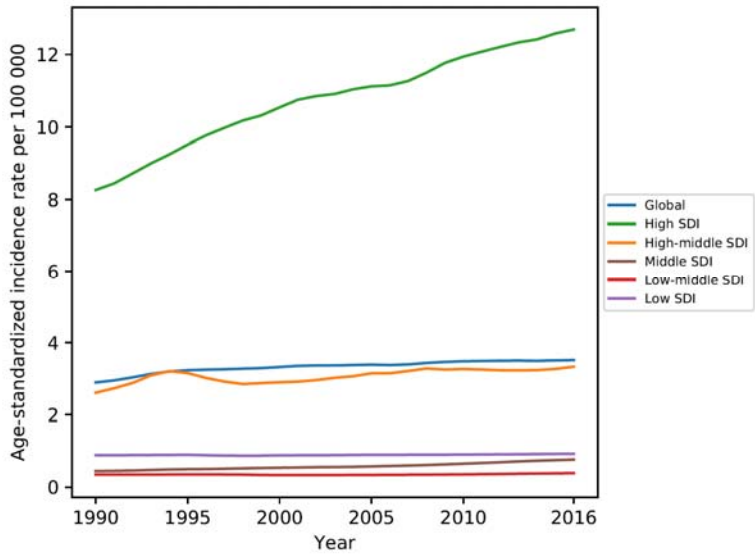

Figure 52: Trends in Age-Standardized Incidence Rates for Melanoma, 1990-2016, Female



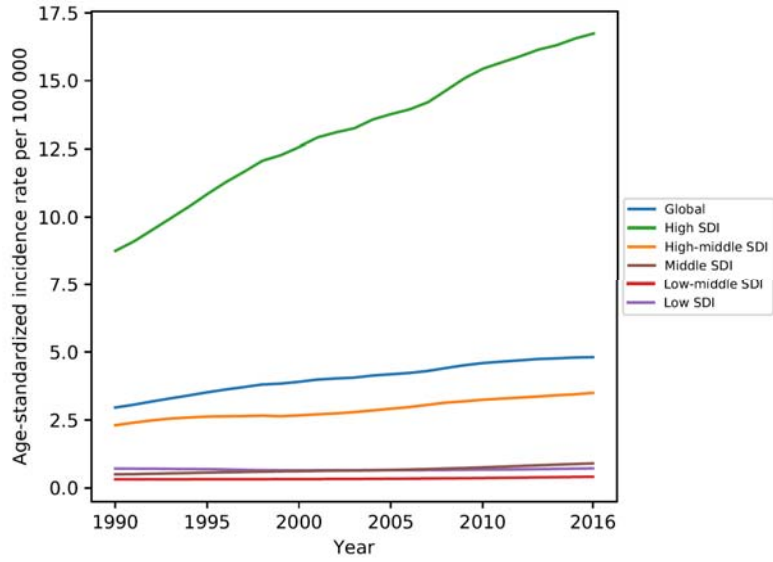

eFigure 53: Trends in Age-Standardized Incidence Rates for Melanoma, 1990-2016, Male

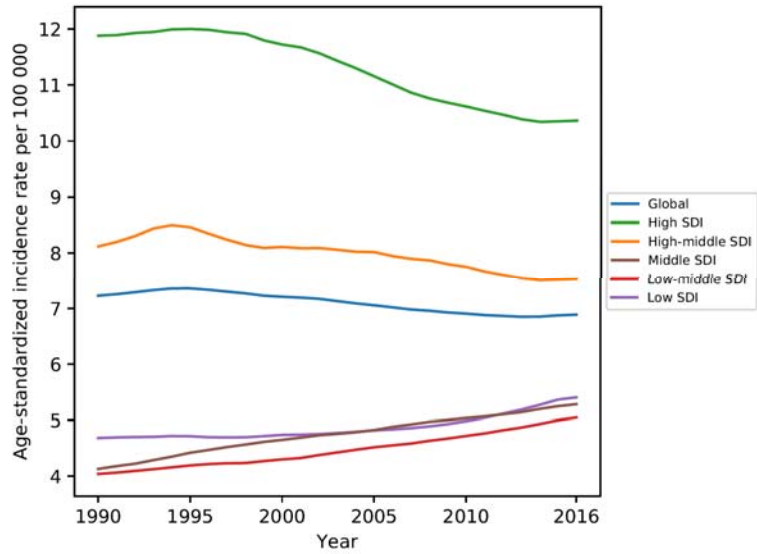

eFigure 54: Trends in Age-Standardized Incidence Rates for Ovarian Cancer, 1990-2016, Female

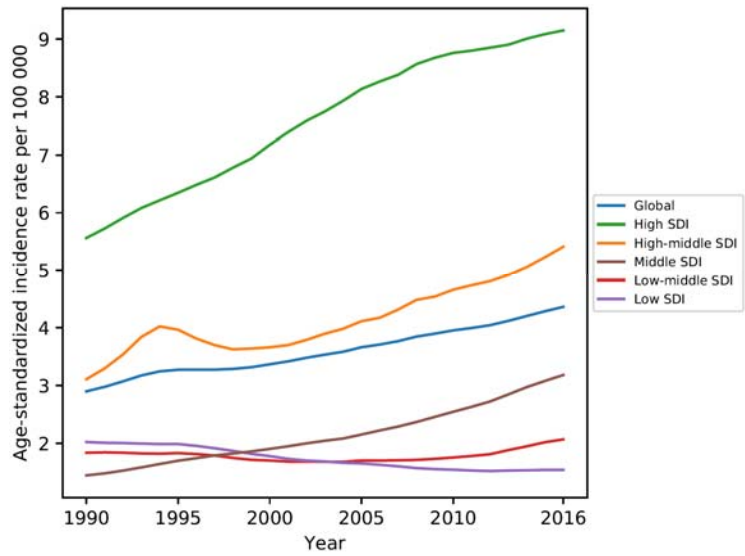

eFigure 55: Trends in Age-Standardized Incidence Rates for Thyroid Cancer, 1990-2016, Female

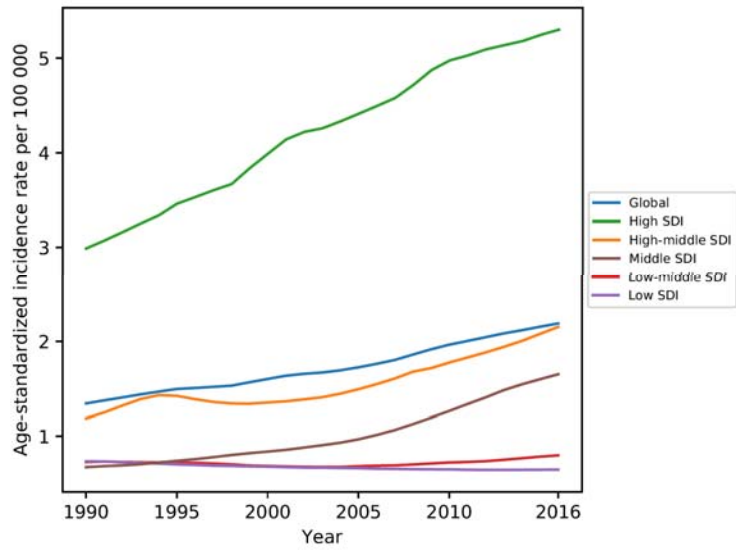

eFigure 56: Trends in Age-Standardized Incidence Rates for Thyroid Cancer, 1990-2016, Male

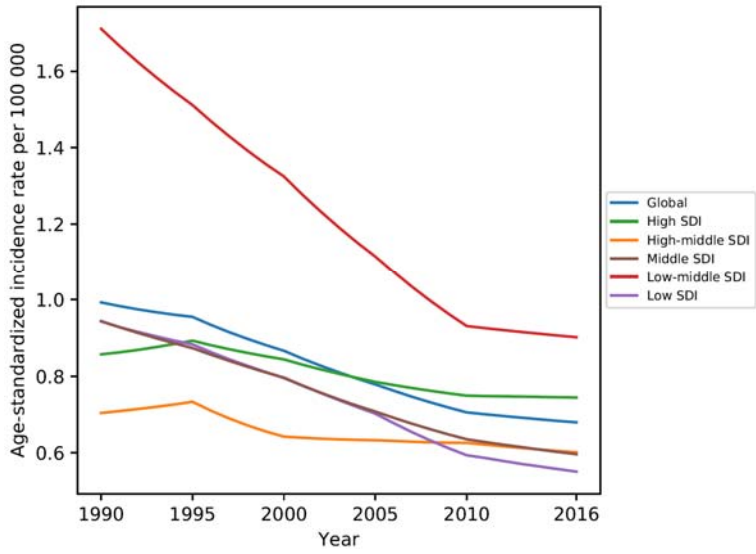

eFigure 57: Trends in Age-Standardized Incidence Rates for Larynx Cancer, 1990-2016, Female

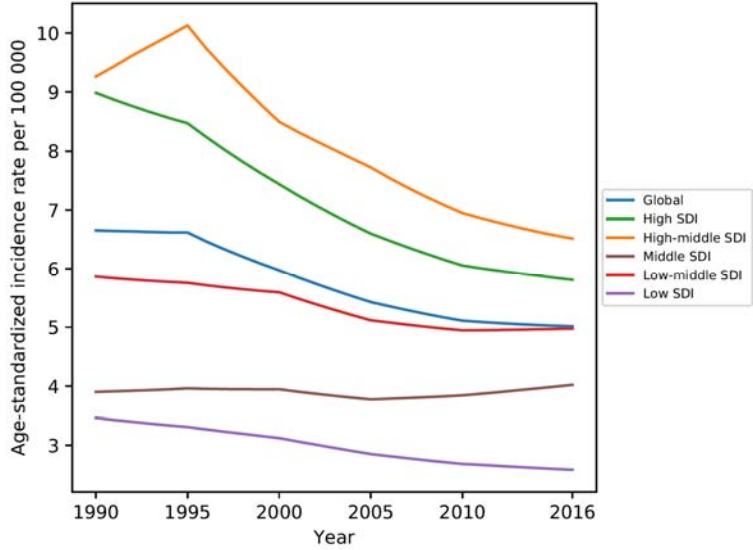

eFigure 58: Trends in Age-Standardized Incidence Rates for Larynx Cancer, 1990-2016, Male

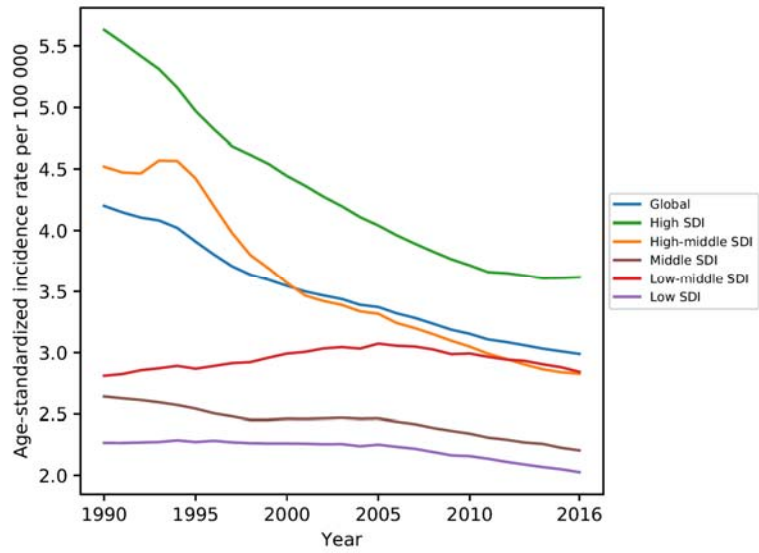

eFigure 59: Trends in Age-Standardized Incidence Rates for Gallbladder Cancer, 1990-2016, Female

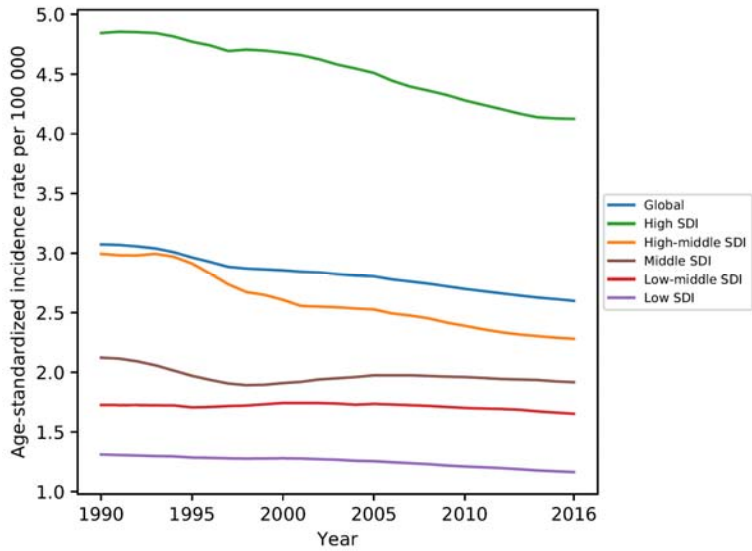

eFigure 60: Trends in Age-Standardized Incidence Rates for Gallbladder Cancer, 1990-2016, Male

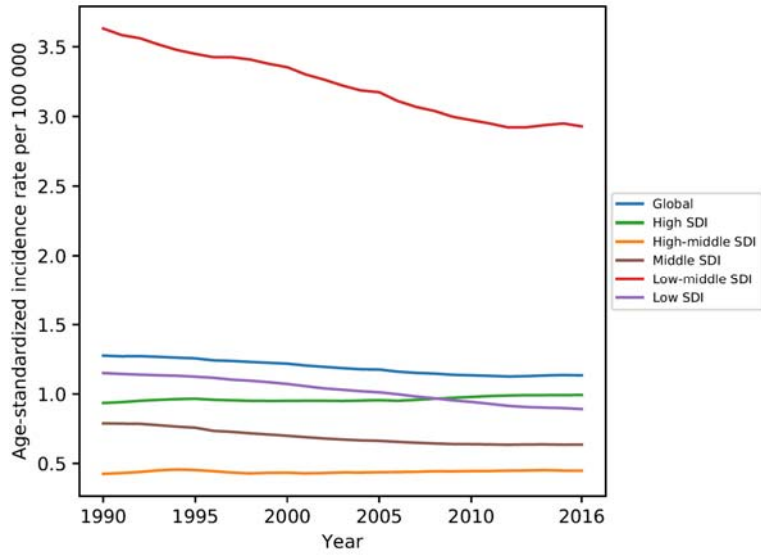

eFigure 61: Trends in Age-Standardized Incidence Rates for Other Pharynx Cancer, 1990-2016, Female

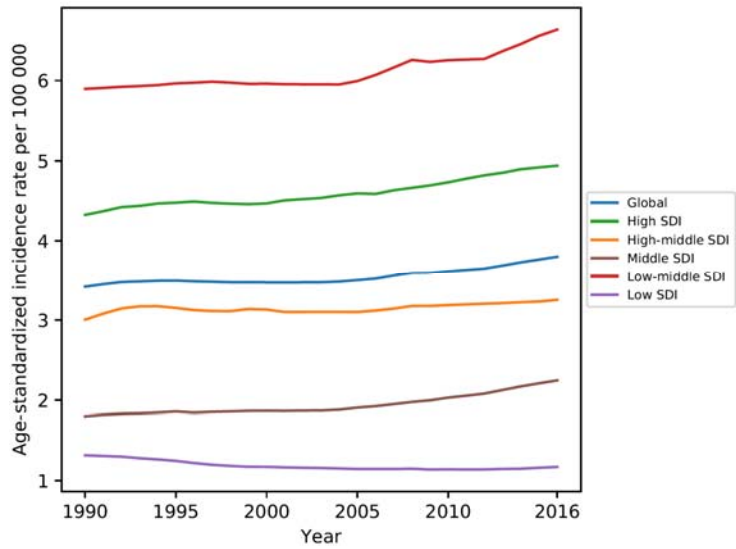

eFigure 62: Trends in Age-Standardized Incidence Rates for Other Pharynx Cancer, 1990-2016, Male

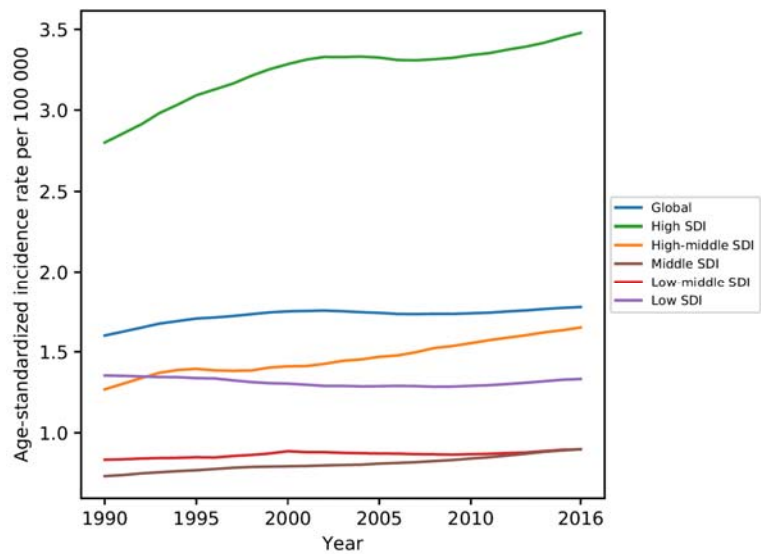

eFigure 63: Trends in Age-Standardized Incidence Rates for Multiple Myeloma, 1990-2016, Female

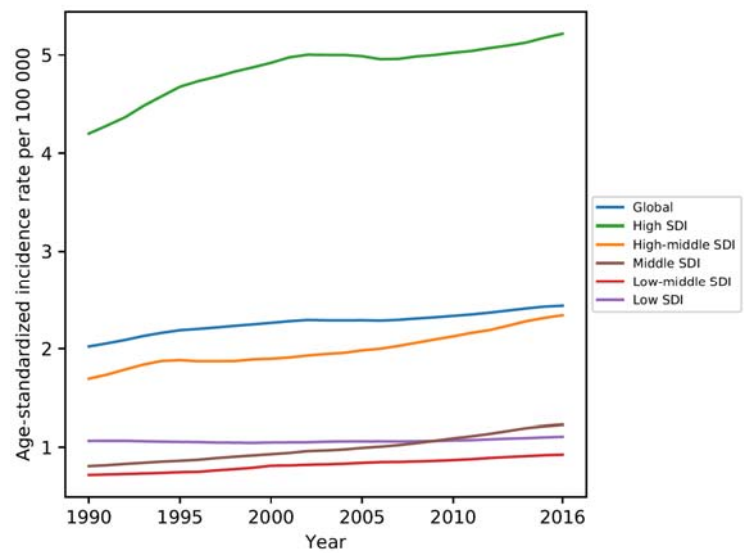

eFigure 64: Trends in Age-Standardized Incidence Rates for Multiple Myeloma, 1990-2016, Male

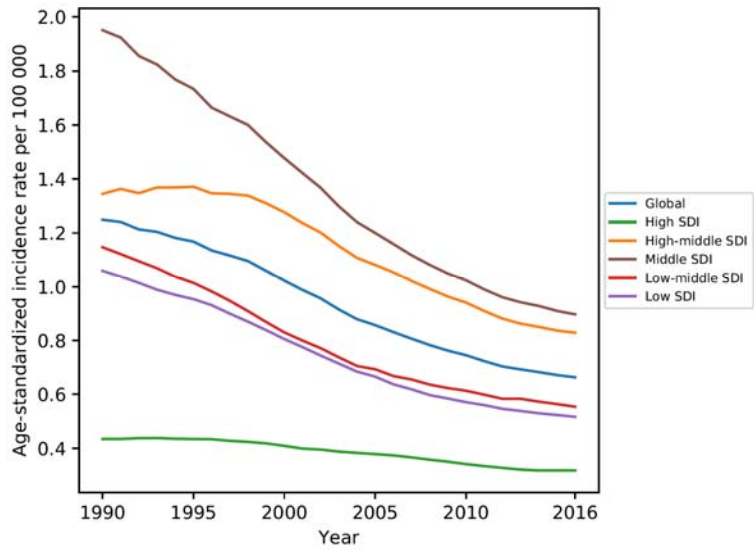

eFigure 65: Trends in Age-Standardized Incidence Rates for Nasopharynx Cancer, 1990-2016, Female

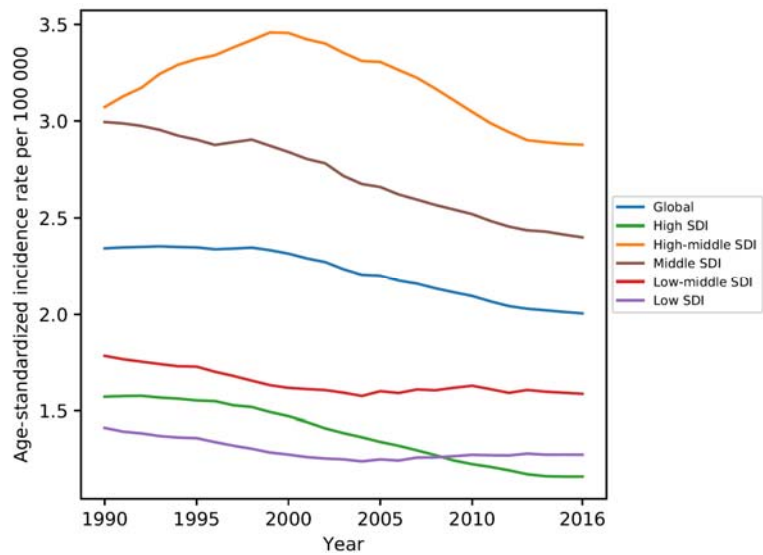

eFigure 66: Trends in Age-Standardized Incidence Rates for Nasopharynx Cancer, 1990-2016, Male

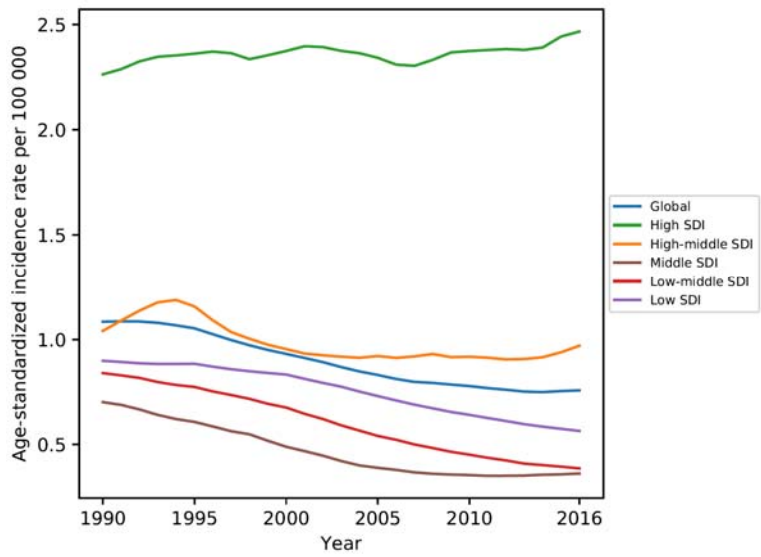

eFigure 67: Trends in Age-Standardized Incidence Rates for Hodgkin Lymphoma, 1990-2016, Female

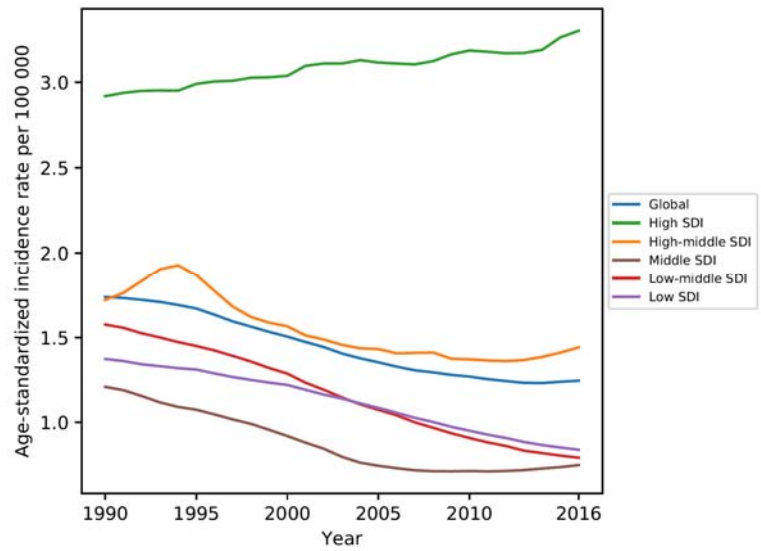

eFigure 68: Trends in Age-Standardized Incidence Rates for Hodgkin Lymphoma, 1990-2016, Male



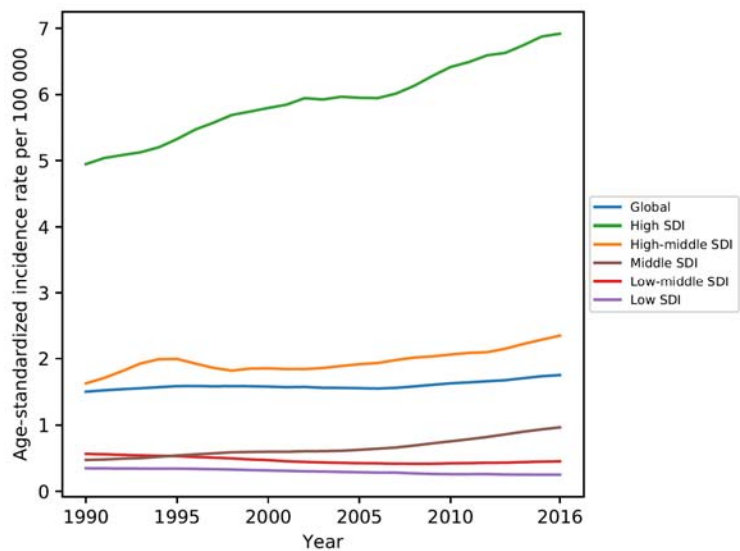

eFigure 69: Trends in Age-Standardized Incidence Rates for Testicular Cancer, 1990-2016, Male

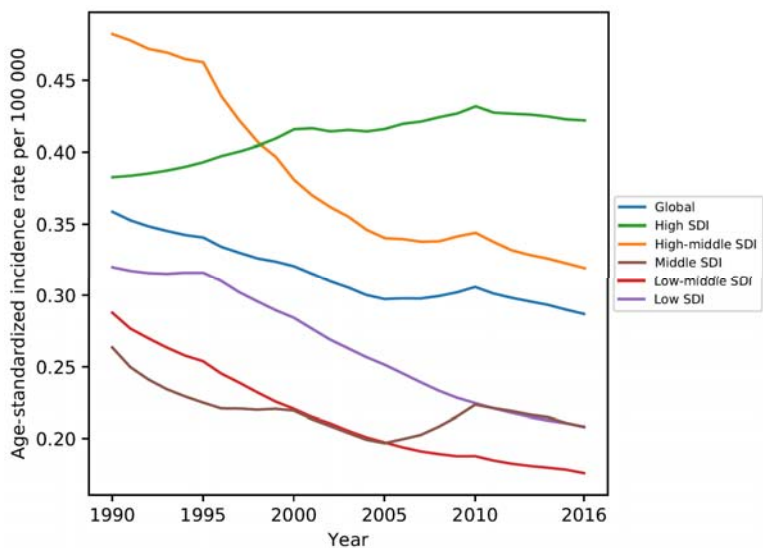

eFigure 70: Trends in Age-Standardized Incidence Rates for Mesothelioma, 1990-2016, Female

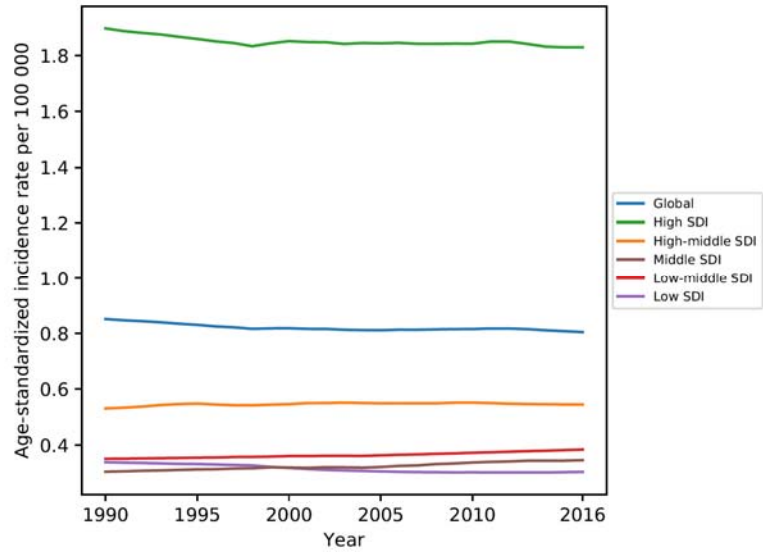

eFigure 71: Trends in Age-Standardized Incidence Rates for Mesothelioma, 1990-2016, Male
